# Supplementary material for: Genetic Influences on Behavioral Outcomes After Childhood TBI: A Novel Systems Biology-Informed Approach
Source: Front Genet. 2019 May 22;10:481. doi: 10.3389/fgene.2019.00481 (PMC6540783; doi:10.3389/fgene.2019.00481)
Supplement: Supplementary file 1 [file Table_1.XLSX]

## Sheet: enrichment
18 + Top 10% enrichment - BP-Pathways
S.No.	Category	ID	Title (or Source)	Verbose ID	Cluster 1_logP	Cluster 1_GeneSet	Curated Term
984	GO: Biological Process	GO:0002376	immune system process	GeneOntologyBiologicalProcess_GO:0002376_immune system process	4.2308	ACE,ADORA1,ADORA2A,APP,BCL2,BMX,BRAF,CASP3,CHRNA4,CHRNA7,CTNNB1,DBH,DRD2,GNAS,IGF1,KRAS,NTRK1,PACS1,PAFAH1B1,PAK1,PEX13,PPP3CB,PRKCA,PSEN1,PSEN2,SCN1A,SLC1A3,SNCA,SOD1,TYR	Immune system
990	GO: Biological Process	GO:0002682	regulation of immune system process	GeneOntologyBiologicalProcess_GO:0002682_regulation of immune system process	4.18624	ACE,ADORA1,ADORA2A,BCL2,CASP3,CTNNB1,DRD2,GNAS,IGF1,KRAS,PACS1,PAK1,PEX13,PPP3CB,PRKCA,PSEN1,PSEN2,SCN1A,SLC1A3,SNCA,SOD1	Immune system
1121	GO: Biological Process	GO:0002520	immune system development	GeneOntologyBiologicalProcess_GO:0002520_immune system development	3.65412	ACE,BCL2,BMX,BRAF,CASP3,CTNNB1,GNAS,NTRK1,PAFAH1B1,PPP3CB,PRKCA,PSEN1,PSEN2,SOD1,TYR	Immune system
1754	GO: Biological Process	GO:0034097	response to cytokine	GeneOntologyBiologicalProcess_GO:0034097_response to cytokine	2.2295	BCL2,CASP3,CTNNB1,KRAS,NTRK2,PAFAH1B1,PPP3CB,PRKCA,SNCA,SYNJ1,VLDLR	Immune system
1815	GO: Biological Process	GO:0002252	immune effector process	GeneOntologyBiologicalProcess_GO:0002252_immune effector process	2.13186	ACE,BCL2,DBH,PACS1,PAK1,PEX13,PPP3CB,PSEN1,PSEN2,SCN1A,SLC1A3	Immune system
2088	GO: Biological Process	GO:0002768	immune response-regulating cell surface receptor signaling pathway	GeneOntologyBiologicalProcess_GO:0002768_immune response-regulating cell surface receptor signaling pathway	1.79402	BCL2,KRAS,PAK1,PPP3CB,PSEN1,PSEN2	Immune system
2197	GO: Biological Process	GO:0032467	positive regulation of cytokinesis	GeneOntologyBiologicalProcess_GO:0032467_positive regulation of cytokinesis	1.72791	DRD2,DRD3	Immune system
2668	Pathway	1269203	Innate Immune System	Pathway_1269203_Innate Immune System	1.87915	APP,BCL2,BRAF,CTNNB1,DLG4,GRIN1,GRIN2A,GRIN2B,GRIN2D,ITPR3,KRAS,NOS1,PAK1,PPP3CB,PRKCA,PSEN1,SNAP25,TSC2	Immune system
12	GO: Biological Process	GO:0051967	negative regulation of synaptic transmission, glutamatergic	GeneOntologyBiologicalProcess_GO:0051967_negative regulation of synaptic transmission, glutamatergic	10	ADORA1,DRD2,GRIK1,GRIK2	Glutamate receptor signaling
72	GO: Biological Process	GO:0035249	synaptic transmission, glutamatergic	GeneOntologyBiologicalProcess_GO:0035249_synaptic transmission, glutamatergic	10	ADORA1,ADORA2A,ADRB2,CDK5,DRD1,DRD2,GRIK1,GRIK2,GRIN1,GRIN2D,GRM7,KALRN,LRRK2,NLGN1,NTRK1,NTRK2,PAK1,PSEN1,RELN	Glutamate receptor signaling
254	GO: Biological Process	GO:0007215	glutamate receptor signaling pathway	GeneOntologyBiologicalProcess_GO:0007215_glutamate receptor signaling pathway	10	APP,CDK5R1,DLG4,FMR1,GRIA1,GRIA3,GRIK1,GRIK2,GRIN1,GRIN2A,GRIN2B,GRIN2D,GRM7,NLGN1,RELN	Glutamate receptor signaling
274	GO: Biological Process	GO:0035235	ionotropic glutamate receptor signaling pathway	GeneOntologyBiologicalProcess_GO:0035235_ionotropic glutamate receptor signaling pathway	10	APP,CDK5R1,GRIA1,GRIA3,GRIK1,GRIK2,GRIN1,GRIN2A,GRIN2B,GRIN2D	Glutamate receptor signaling
352	GO: Biological Process	GO:0014047	glutamate secretion	GeneOntologyBiologicalProcess_GO:0014047_glutamate secretion	10	ADORA1,ADORA2A,BDNF,GRIN2B,GRM7,NTRK2,PAK1,SLC1A3,SNAP25,SNCA	Glutamate receptor signaling
370	GO: Biological Process	GO:0014048	regulation of glutamate secretion	GeneOntologyBiologicalProcess_GO:0014048_regulation of glutamate secretion	10	ADORA1,ADORA2A,GRIN2B,GRM7,SNCA	Glutamate receptor signaling
462	GO: Biological Process	GO:0051968	positive regulation of synaptic transmission, glutamatergic	GeneOntologyBiologicalProcess_GO:0051968_positive regulation of synaptic transmission, glutamatergic	10	ADORA2A,DRD1,NLGN1,NTRK1,NTRK2,RELN	Glutamate receptor signaling
634	GO: Biological Process	GO:0051966	regulation of synaptic transmission, glutamatergic	GeneOntologyBiologicalProcess_GO:0051966_regulation of synaptic transmission, glutamatergic	10	ADORA1,ADORA2A,DRD1,DRD2,GRIK1,GRIK2,GRM7,KALRN,LRRK2,NLGN1,NTRK1,NTRK2,PSEN1,RELN	Glutamate receptor signaling
731	GO: Biological Process	GO:0097688	glutamate receptor clustering	GeneOntologyBiologicalProcess_GO:0097688_glutamate receptor clustering	5.78783	APOE,DLG4,NLGN1	Glutamate receptor signaling
732	GO: Biological Process	GO:0097113	AMPA glutamate receptor clustering	GeneOntologyBiologicalProcess_GO:0097113_AMPA glutamate receptor clustering	5.78783	APOE,DLG4,NLGN1	Glutamate receptor signaling
764	GO: Biological Process	GO:0097114	NMDA glutamate receptor clustering	GeneOntologyBiologicalProcess_GO:0097114_NMDA glutamate receptor clustering	5.48855	APOE,NLGN1,RELN	Glutamate receptor signaling
1268	GO: Biological Process	GO:1900449	regulation of glutamate receptor signaling pathway	GeneOntologyBiologicalProcess_GO:1900449_regulation of glutamate receptor signaling pathway	3.13951	DLG4,NLGN1,RELN	Glutamate receptor signaling
1311	GO: Biological Process	GO:0014050	negative regulation of glutamate secretion	GeneOntologyBiologicalProcess_GO:0014050_negative regulation of glutamate secretion	2.97334	ADORA1,GRM7	Glutamate receptor signaling
1389	GO: Biological Process	GO:0014049	positive regulation of glutamate secretion	GeneOntologyBiologicalProcess_GO:0014049_positive regulation of glutamate secretion	2.79241	ADORA2A,GRIN2B	Glutamate receptor signaling
1849	GO: Biological Process	GO:0015813	L-glutamate transport	GeneOntologyBiologicalProcess_GO:0015813_L-glutamate transport	2.07754	PSEN1,SLC1A3	Glutamate receptor signaling
1992	GO: Biological Process	GO:0006540	glutamate decarboxylation to succinate	GeneOntologyBiologicalProcess_GO:0006540_glutamate decarboxylation to succinate	1.95737	GAD1	Glutamate receptor signaling
2040	GO: Biological Process	GO:0006536	glutamate metabolic process	GeneOntologyBiologicalProcess_GO:0006536_glutamate metabolic process	1.87007	GAD1,SLC1A3	Glutamate receptor signaling
2102	GO: Biological Process	GO:0061535	glutamate secretion, neurotransmission	GeneOntologyBiologicalProcess_GO:0061535_glutamate secretion, neurotransmission	1.78247	PAK1	Glutamate receptor signaling
2272	GO: Biological Process	GO:1900451	positive regulation of glutamate receptor signaling pathway	GeneOntologyBiologicalProcess_GO:1900451_positive regulation of glutamate receptor signaling pathway	1.65872	RELN	Glutamate receptor signaling
2340	Pathway	1268799	Unblocking of NMDA receptor, glutamate binding and activation	Pathway_1268799_Unblocking of NMDA receptor, glutamate binding and activation	10	DLG4,GRIA1,GRIA3,GRIN1,GRIN2A,GRIN2B,GRIN2D	Glutamate receptor signaling
2350	Pathway	P00039	Metabotropic glutamate receptor group III pathway	Pathway_P00039_Metabotropic glutamate receptor group III pathway	10	GRIA1,GRIA3,GRIK1,GRIK2,GRIN1,GRIN2A,GRIN2B,GRIN2D,GRM7,SLC1A3,SNAP25	Glutamate receptor signaling
2364	Pathway	P00037	Ionotropic glutamate receptor pathway	Pathway_P00037_Ionotropic glutamate receptor pathway	10	GRIA1,GRIA3,GRIK1,GRIK2,GRIN1,GRIN2A,GRIN2B,GRIN2D,SLC1A3,SNAP25	Glutamate receptor signaling
2372	Pathway	1268798	Activation of NMDA receptor upon glutamate binding and postsynaptic events	Pathway_1268798_Activation of NMDA receptor upon glutamate binding and postsynaptic events	10	BRAF,DLG4,GRIA1,GRIA3,GRIN1,GRIN2A,GRIN2B,GRIN2D	Glutamate receptor signaling
2391	Pathway	213818	Glutamatergic synapse	Pathway_213818_Glutamatergic synapse	10	DLG4,GNAS,GRIA1,GRIA3,GRIK1,GRIK2,GRIN1,GRIN2A,GRIN2B,GRIN2D,GRM7,ITPR3,PPP3CB,PRKCA,SLC1A3	Glutamate receptor signaling
2393	Pathway	P00041	Metabotropic glutamate receptor group I pathway	Pathway_P00041_Metabotropic glutamate receptor group I pathway	5.98744	GRIK1,GRIN1,GRIN2A,GRIN2B,GRIN2D	Glutamate receptor signaling
2410	Pathway	M16626	Regulation of ck1/cdk5 by type 1 glutamate receptors	Pathway_M16626_Regulation of ck1/cdk5 by type 1 glutamate receptors	5.10008	CDK5,CDK5R1,DRD1,DRD2	Glutamate receptor signaling
2438	Pathway	1268794	Glutamate Binding, Activation of AMPA Receptors and Synaptic Plasticity	Pathway_1268794_Glutamate Binding, Activation of AMPA Receptors and Synaptic Plasticity	3.96016	DLG4,GRIA1,GRIA3,PRKCA	Glutamate receptor signaling
2440	Pathway	1268808	Activation of Kainate Receptors upon glutamate binding	Pathway_1268808_Activation of Kainate Receptors upon glutamate binding	3.96016	DLG3,DLG4,GRIK1,GRIK2	Glutamate receptor signaling
2561	Pathway	PW:0000027	glutamate metabolic	Pathway_PW:0000027_glutamate metabolic	2.34476	ABAT,GAD1	Glutamate receptor signaling
2647	Pathway	MAP00251_Glutamate_metabolism	MAP00251 Glutamate metabolism	Pathway_MAP00251_Glutamate_metabolism_MAP00251 Glutamate metabolism	1.97365	ABAT,GAD1	Glutamate receptor signaling
2	GO: Biological Process	GO:0090494	dopamine uptake	GeneOntologyBiologicalProcess_GO:0090494_dopamine uptake	10	DRD1,DRD2,DRD3,DRD4,SLC6A3,SNCA	Dopamine signaling
32	GO: Biological Process	GO:0007212	dopamine receptor signaling pathway	GeneOntologyBiologicalProcess_GO:0007212_dopamine receptor signaling pathway	10	DRD1,DRD2,DRD3,DRD4,DRD5,GNAS,LRRK2	Dopamine signaling
39	GO: Biological Process	GO:0001963	synaptic transmission, dopaminergic	GeneOntologyBiologicalProcess_GO:0001963_synaptic transmission, dopaminergic	10	ADORA2A,CDK5,CHRNA7,DRD1,DRD2,DRD3,DRD4,DRD5,SLC6A3,SLC6A4,SNCA,TH	Dopamine signaling
63	GO: Biological Process	GO:0032225	regulation of synaptic transmission, dopaminergic	GeneOntologyBiologicalProcess_GO:0032225_regulation of synaptic transmission, dopaminergic	10	CHRNA7,DRD1,DRD2,DRD3,DRD4,SLC6A4,SNCA	Dopamine signaling
97	GO: Biological Process	GO:0042053	regulation of dopamine metabolic process	GeneOntologyBiologicalProcess_GO:0042053_regulation of dopamine metabolic process	10	ABAT,COMT,DRD1,DRD4,SLC6A3,SNCA	Dopamine signaling
440	GO: Biological Process	GO:0015872	dopamine transport	GeneOntologyBiologicalProcess_GO:0015872_dopamine transport	10	ABAT,CHRNA4,DRD1,DRD2,DRD3,DRD4,SLC18A2,SLC6A3,SNCA	Dopamine signaling
465	GO: Biological Process	GO:0014046	dopamine secretion	GeneOntologyBiologicalProcess_GO:0014046_dopamine secretion	10	ABAT,CHRNA4,DRD2,DRD3,SNCA	Dopamine signaling
490	GO: Biological Process	GO:0042417	dopamine metabolic process	GeneOntologyBiologicalProcess_GO:0042417_dopamine metabolic process	10	ABAT,AGTR2,COMT,DBH,DRD1,DRD2,DRD3,DRD4,GRIN2A,MAOA,SLC6A3,SNCA,TH	Dopamine signaling
494	GO: Biological Process	GO:0051584	regulation of dopamine uptake involved in synaptic transmission	GeneOntologyBiologicalProcess_GO:0051584_regulation of dopamine uptake involved in synaptic transmission	10	DRD1,DRD2,DRD3,DRD4,SNCA	Dopamine signaling
589	GO: Biological Process	GO:0014059	regulation of dopamine secretion	GeneOntologyBiologicalProcess_GO:0014059_regulation of dopamine secretion	10	ABAT,CHRNA4,DRD2,DRD3,SNCA	Dopamine signaling
624	GO: Biological Process	GO:0007191	adenylate cyclase-activating dopamine receptor signaling pathway	GeneOntologyBiologicalProcess_GO:0007191_adenylate cyclase-activating dopamine receptor signaling pathway	10	DRD1,DRD3,DRD5,GNAS	Dopamine signaling
661	GO: Biological Process	GO:0042420	dopamine catabolic process	GeneOntologyBiologicalProcess_GO:0042420_dopamine catabolic process	10	COMT,DBH,MAOA,SLC6A3	Dopamine signaling
701	GO: Biological Process	GO:0042416	dopamine biosynthetic process	GeneOntologyBiologicalProcess_GO:0042416_dopamine biosynthetic process	10	AGTR2,SLC6A3,SNCA,TH	Dopamine signaling
704	GO: Biological Process	GO:0051583	dopamine uptake involved in synaptic transmission	GeneOntologyBiologicalProcess_GO:0051583_dopamine uptake involved in synaptic transmission	10	DRD1,DRD2,DRD3,DRD4,SLC6A3,SNCA	Dopamine signaling
766	GO: Biological Process	GO:0007195	adenylate cyclase-inhibiting dopamine receptor signaling pathway	GeneOntologyBiologicalProcess_GO:0007195_adenylate cyclase-inhibiting dopamine receptor signaling pathway	5.48855	DRD2,DRD3,DRD4	Dopamine signaling
840	GO: Biological Process	GO:0060159	regulation of dopamine receptor signaling pathway	GeneOntologyBiologicalProcess_GO:0060159_regulation of dopamine receptor signaling pathway	5.04489	DRD2,DRD3,LRRK2	Dopamine signaling
891	GO: Biological Process	GO:0060158	phospholipase C-activating dopamine receptor signaling pathway	GeneOntologyBiologicalProcess_GO:0060158_phospholipase C-activating dopamine receptor signaling pathway	4.7174	DRD1,DRD2,DRD5	Dopamine signaling
1033	GO: Biological Process	GO:0045963	negative regulation of dopamine metabolic process	GeneOntologyBiologicalProcess_GO:0045963_negative regulation of dopamine metabolic process	4.04309	COMT,SNCA	Dopamine signaling
1034	GO: Biological Process	GO:0060160	negative regulation of dopamine receptor signaling pathway	GeneOntologyBiologicalProcess_GO:0060160_negative regulation of dopamine receptor signaling pathway	4.04309	DRD2,DRD3	Dopamine signaling
1089	GO: Biological Process	GO:0051586	positive regulation of dopamine uptake involved in synaptic transmission	GeneOntologyBiologicalProcess_GO:0051586_positive regulation of dopamine uptake involved in synaptic transmission	3.74363	DRD2,DRD4	Dopamine signaling
1096	GO: Biological Process	GO:0060161	positive regulation of dopamine receptor signaling pathway	GeneOntologyBiologicalProcess_GO:0060161_positive regulation of dopamine receptor signaling pathway	3.74363	DRD3,LRRK2	Dopamine signaling
1155	GO: Biological Process	GO:0032227	negative regulation of synaptic transmission, dopaminergic	GeneOntologyBiologicalProcess_GO:0032227_negative regulation of synaptic transmission, dopaminergic	3.52336	SLC6A4,SNCA	Dopamine signaling
1158	GO: Biological Process	GO:0033602	negative regulation of dopamine secretion	GeneOntologyBiologicalProcess_GO:0033602_negative regulation of dopamine secretion	3.52336	ABAT,DRD2	Dopamine signaling
1283	GO: Biological Process	GO:0032226	positive regulation of synaptic transmission, dopaminergic	GeneOntologyBiologicalProcess_GO:0032226_positive regulation of synaptic transmission, dopaminergic	3.08091	DRD2,DRD4	Dopamine signaling
1687	GO: Biological Process	GO:0051585	negative regulation of dopamine uptake involved in synaptic transmission	GeneOntologyBiologicalProcess_GO:0051585_negative regulation of dopamine uptake involved in synaptic transmission	2.25481	SNCA	Dopamine signaling
1720	GO: Biological Process	GO:0006585	dopamine biosynthetic process from tyrosine	GeneOntologyBiologicalProcess_GO:0006585_dopamine biosynthetic process from tyrosine	2.25481	TH	Dopamine signaling
2338	Pathway	P05912	Dopamine receptor mediated signaling pathway	Pathway_P05912_Dopamine receptor mediated signaling pathway	10	COMT,DBH,DRD1,DRD2,DRD3,DRD4,DRD5,MAOA,SLC18A2,SLC6A3,SNAP25,TH	Dopamine signaling
2363	Pathway	PW:0000394	dopamine signaling	Pathway_PW:0000394_dopamine signaling	10	DRD1,DRD2,DRD3,DRD4,DRD5	Dopamine signaling
2368	Pathway	469199	Dopaminergic synapse	Pathway_469199_Dopaminergic synapse	10	COMT,DRD1,DRD2,DRD3,DRD4,DRD5,GNAS,GRIA1,GRIA3,GRIN2A,GRIN2B,ITPR3,MAOA,PPP3CB,PRKCA,SCN1A,SLC18A2,SLC6A3,TH	Dopamine signaling
2386	Pathway	1269556	Dopamine receptors	Pathway_1269556_Dopamine receptors	10	DRD1,DRD2,DRD3,DRD4,DRD5	Dopamine signaling
2398	Pathway	1268779	Dopamine clearance from the synaptic cleft	Pathway_1268779_Dopamine clearance from the synaptic cleft	5.72556	COMT,MAOA,SLC6A3	Dopamine signaling
2405	Pathway	413357	Catecholamine biosynthesis, tyrosine => dopamine => noradrenaline => adrenaline	Pathway_413357_Catecholamine biosynthesis, tyrosine => dopamine => noradrenaline => adrenaline	5.33012	DBH,TH,TYR	Dopamine signaling
2451	Pathway	142324	dopamine degradation	Pathway_142324_dopamine degradation	3.73741	COMT,MAOA	Dopamine signaling
2453	Pathway	1268780	Enzymatic degradation of dopamine by COMT	Pathway_1268780_Enzymatic degradation of dopamine by COMT	3.73741	COMT,MAOA	Dopamine signaling
2454	Pathway	1268781	Enzymatic degradation of Dopamine by monoamine oxidase	Pathway_1268781_Enzymatic degradation of Dopamine by monoamine oxidase	3.73741	COMT,MAOA	Dopamine signaling
2498	Pathway	1268772	Dopamine Neurotransmitter Release Cycle	Pathway_1268772_Dopamine Neurotransmitter Release Cycle	3.12663	SLC18A2,SNAP25,SYN1	Dopamine signaling
472	GO: Biological Process	GO:0042428	serotonin metabolic process	GeneOntologyBiologicalProcess_GO:0042428_serotonin metabolic process	10	ATP2B2,GRIN2A,MAOA,TPH2	Serotonin signaling
734	GO: Biological Process	GO:0051610	serotonin uptake	GeneOntologyBiologicalProcess_GO:0051610_serotonin uptake	5.78783	NOS1,SLC6A4,SNCA	Serotonin signaling
807	GO: Biological Process	GO:0006837	serotonin transport	GeneOntologyBiologicalProcess_GO:0006837_serotonin transport	5.22337	NOS1,SLC18A2,SLC6A4,SNCA	Serotonin signaling
1097	GO: Biological Process	GO:0051611	regulation of serotonin uptake	GeneOntologyBiologicalProcess_GO:0051611_regulation of serotonin uptake	3.74363	NOS1,SNCA	Serotonin signaling
1103	GO: Biological Process	GO:0051612	negative regulation of serotonin uptake	GeneOntologyBiologicalProcess_GO:0051612_negative regulation of serotonin uptake	3.74363	NOS1,SNCA	Serotonin signaling
1731	GO: Biological Process	GO:0006587	serotonin biosynthetic process from tryptophan	GeneOntologyBiologicalProcess_GO:0006587_serotonin biosynthetic process from tryptophan	2.25481	TPH2	Serotonin signaling
2154	GO: Biological Process	GO:0042427	serotonin biosynthetic process	GeneOntologyBiologicalProcess_GO:0042427_serotonin biosynthetic process	1.78247	TPH2	Serotonin signaling
2387	Pathway	525336	Serotonergic synapse	Pathway_525336_Serotonergic synapse	10	APP,BRAF,CASP3,GNAS,ITPR3,KCND2,KRAS,MAOA,PRKCA,SLC18A2,SLC6A4,TPH2	Serotonin signaling
2450	Pathway	1268782	Serotonin clearance from the synaptic cleft	Pathway_1268782_Serotonin clearance from the synaptic cleft	3.73741	MAOA,SLC6A4	Serotonin signaling
2465	Pathway	1268770	Serotonin Neurotransmitter Release Cycle	Pathway_1268770_Serotonin Neurotransmitter Release Cycle	3.45076	SLC18A2,SNAP25,SYN1	Serotonin signaling
2388	Pathway	83050	Calcium signaling pathway	Pathway_83050_Calcium signaling pathway	10	ADORA2A,ADRB2,ATP2B2,CHRNA7,DRD1,DRD5,GNAS,GRIN1,GRIN2A,GRIN2D,ITPR3,NOS1,PPP3CB,PRKCA	Calcium signaling
24	GO: Biological Process	GO:0051963	regulation of synapse assembly	GeneOntologyBiologicalProcess_GO:0051963_regulation of synapse assembly	10	BDNF,GRIN1,MECP2,NLGN1,NTRK1,NTRK2,PRKCA	Synapse assembly
119	GO: Biological Process	GO:0050803	regulation of synapse structure or activity	GeneOntologyBiologicalProcess_GO:0050803_regulation of synapse structure or activity	10	ADORA1,ADORA2A,AGT,APOE,APP,ATP2B2,BDNF,BRAF,CDK5,DLG4,DRD1,DRD2,DRD5,FMR1,GRIA1,GRIK1,GRIK2,GRIN1,GRIN2A,GRIN2B,ITPR3,KRAS,MAPT,MECP2,NLGN1,NOS1,NTRK1,NTRK2,PAK1,PPP3CB,PRKCA,PSEN1,PSEN2,RELN,SNAP25,SNCA	Synapse assembly
129	GO: Biological Process	GO:0099643	signal release from synapse	GeneOntologyBiologicalProcess_GO:0099643_signal release from synapse	10	ADORA2A,BRAF,CDK5,CHAT,DRD4,FMR1,GAD1,LRRK2,NGF,NLGN1,NTRK2,PAK1,PSEN1,SLC18A2,SNAP25,SNCA,SYN1,SYNJ1	Synapse assembly
172	GO: Biological Process	GO:0050808	synapse organization	GeneOntologyBiologicalProcess_GO:0050808_synapse organization	10	APOE,APP,ATP2B2,BDNF,CDK5,CHAT,CTNNB1,DLG4,DRD1,DRD2,GRIN1,IL1RAPL1,LRRK2,MECP2,NLGN1,NTRK1,NTRK2,PAK1,PRKCA,RELN,SNCA	Synapse assembly
279	GO: Biological Process	GO:0007416	synapse assembly	GeneOntologyBiologicalProcess_GO:0007416_synapse assembly	10	APP,BDNF,CDK5,DRD1,DRD2,GRIN1,IL1RAPL1,MECP2,NLGN1,NTRK1,NTRK2,PRKCA,RELN	Synapse assembly
302	GO: Biological Process	GO:0097120	receptor localization to synapse	GeneOntologyBiologicalProcess_GO:0097120_receptor localization to synapse	10	DLG3,DLG4,NLGN1,RELN	Synapse assembly
318	GO: Biological Process	GO:0050807	regulation of synapse organization	GeneOntologyBiologicalProcess_GO:0050807_regulation of synapse organization	10	APOE,BDNF,DRD2,GRIN1,MECP2,NLGN1,NTRK1,NTRK2,PRKCA,RELN	Synapse assembly
670	GO: Biological Process	GO:0035418	protein localization to synapse	GeneOntologyBiologicalProcess_GO:0035418_protein localization to synapse	10	CDK5,DLG3,DLG4,NLGN1,RELN	Synapse assembly
747	GO: Biological Process	GO:0051965	positive regulation of synapse assembly	GeneOntologyBiologicalProcess_GO:0051965_positive regulation of synapse assembly	5.65087	BDNF,MECP2,NLGN1,NTRK1,NTRK2,PRKCA	Synapse assembly
2379	Pathway	1427849	Protein-protein interactions at synapses	Pathway_1427849_Protein-protein interactions at synapses	10	DLG3,DLG4,GRIA1,GRIA3,GRIN1,GRIN2A,GRIN2B,GRIN2D,NLGN1	Synapse assembly
11	GO: Biological Process	GO:0001505	regulation of neurotransmitter levels	GeneOntologyBiologicalProcess_GO:0001505_regulation of neurotransmitter levels	10	ABAT,ADORA2A,BRAF,CDK5,CHAT,COMT,DBH,DRD1,DRD2,DRD3,DRD4,FMR1,GABRA2,GAD1,LRRK2,MAOA,NGF,NLGN1,NOS1,NTRK2,PAK1,PSEN1,SLC18A2,SLC1A3,SLC6A3,SLC6A4,SNAP25,SNCA,SYN1,SYNJ1,TH	Neurotransmitter signaling
77	GO: Biological Process	GO:0051580	regulation of neurotransmitter uptake	GeneOntologyBiologicalProcess_GO:0051580_regulation of neurotransmitter uptake	10	DRD1,DRD2,DRD3,DRD4,NOS1,SNCA	Neurotransmitter signaling
151	GO: Biological Process	GO:0006836	neurotransmitter transport	GeneOntologyBiologicalProcess_GO:0006836_neurotransmitter transport	10	ADORA2A,BRAF,CDK5,CHAT,DRD1,DRD2,DRD3,DRD4,FMR1,GABRA2,GAD1,LRRK2,NGF,NLGN1,NOS1,NTRK2,PAK1,PSEN1,SLC18A2,SLC1A3,SLC6A3,SLC6A4,SNAP25,SNCA,SYN1,SYNJ1,TH	Neurotransmitter signaling
188	GO: Biological Process	GO:0042136	neurotransmitter biosynthetic process	GeneOntologyBiologicalProcess_GO:0042136_neurotransmitter biosynthetic process	10	CHAT,GAD1,NOS1,SLC6A3,TH	Neurotransmitter signaling
208	GO: Biological Process	GO:0001504	neurotransmitter uptake	GeneOntologyBiologicalProcess_GO:0001504_neurotransmitter uptake	10	DRD1,DRD2,DRD3,DRD4,NOS1,SLC1A3,SLC6A3,SLC6A4,SNAP25,SNCA	Neurotransmitter signaling
270	GO: Biological Process	GO:0098810	neurotransmitter reuptake	GeneOntologyBiologicalProcess_GO:0098810_neurotransmitter reuptake	10	DRD1,DRD2,DRD3,DRD4,NOS1,SLC6A3,SLC6A4,SNCA	Neurotransmitter signaling
309	GO: Biological Process	GO:0051590	positive regulation of neurotransmitter transport	GeneOntologyBiologicalProcess_GO:0051590_positive regulation of neurotransmitter transport	10	ADORA2A,DRD2,DRD4,NLGN1,SNCA	Neurotransmitter signaling
425	GO: Biological Process	GO:0007269	neurotransmitter secretion	GeneOntologyBiologicalProcess_GO:0007269_neurotransmitter secretion	10	ADORA2A,BRAF,CDK5,CHAT,DRD4,FMR1,GAD1,LRRK2,NGF,NLGN1,NTRK2,PAK1,PSEN1,SLC18A2,SNAP25,SNCA,SYN1,SYNJ1	Neurotransmitter signaling
566	GO: Biological Process	GO:0042133	neurotransmitter metabolic process	GeneOntologyBiologicalProcess_GO:0042133_neurotransmitter metabolic process	10	ABAT,CHAT,COMT,DBH,GAD1,MAOA,NOS1,SLC6A3,TH	Neurotransmitter signaling
569	GO: Biological Process	GO:0051588	regulation of neurotransmitter transport	GeneOntologyBiologicalProcess_GO:0051588_regulation of neurotransmitter transport	10	ADORA2A,BRAF,DRD1,DRD2,DRD3,DRD4,FMR1,LRRK2,NGF,NLGN1,NOS1,NTRK2,SLC18A2,SNCA,SYN1	Neurotransmitter signaling
622	GO: Biological Process	GO:0072578	neurotransmitter-gated ion channel clustering	GeneOntologyBiologicalProcess_GO:0072578_neurotransmitter-gated ion channel clustering	10	APOE,DLG4,NLGN1,RELN	Neurotransmitter signaling
630	GO: Biological Process	GO:0051589	negative regulation of neurotransmitter transport	GeneOntologyBiologicalProcess_GO:0051589_negative regulation of neurotransmitter transport	10	BRAF,FMR1,NOS1,SLC18A2,SNCA	Neurotransmitter signaling
699	GO: Biological Process	GO:0046928	regulation of neurotransmitter secretion	GeneOntologyBiologicalProcess_GO:0046928_regulation of neurotransmitter secretion	10	ADORA2A,BRAF,DRD4,FMR1,LRRK2,NGF,NLGN1,NTRK2,SNCA,SYN1	Neurotransmitter signaling
894	GO: Biological Process	GO:0042135	neurotransmitter catabolic process	GeneOntologyBiologicalProcess_GO:0042135_neurotransmitter catabolic process	4.7174	ABAT,COMT,MAOA	Neurotransmitter signaling
944	GO: Biological Process	GO:0099601	regulation of neurotransmitter receptor activity	GeneOntologyBiologicalProcess_GO:0099601_regulation of neurotransmitter receptor activity	4.44344	CHRNA4,DLG4,NLGN1,RELN	Neurotransmitter signaling
1022	GO: Biological Process	GO:0001956	positive regulation of neurotransmitter secretion	GeneOntologyBiologicalProcess_GO:0001956_positive regulation of neurotransmitter secretion	4.05889	ADORA2A,NLGN1,SNCA	Neurotransmitter signaling
1027	GO: Biological Process	GO:0015842	aminergic neurotransmitter loading into synaptic vesicle	GeneOntologyBiologicalProcess_GO:0015842_aminergic neurotransmitter loading into synaptic vesicle	4.04309	SLC18A2,TH	Neurotransmitter signaling
1030	GO: Biological Process	GO:0098700	neurotransmitter loading into synaptic vesicle	GeneOntologyBiologicalProcess_GO:0098700_neurotransmitter loading into synaptic vesicle	4.04309	SLC18A2,TH	Neurotransmitter signaling
1100	GO: Biological Process	GO:0051581	negative regulation of neurotransmitter uptake	GeneOntologyBiologicalProcess_GO:0051581_negative regulation of neurotransmitter uptake	3.74363	NOS1,SNCA	Neurotransmitter signaling
1162	GO: Biological Process	GO:0051582	positive regulation of neurotransmitter uptake	GeneOntologyBiologicalProcess_GO:0051582_positive regulation of neurotransmitter uptake	3.52336	DRD2,DRD4	Neurotransmitter signaling
1458	GO: Biological Process	GO:0046929	negative regulation of neurotransmitter secretion	GeneOntologyBiologicalProcess_GO:0046929_negative regulation of neurotransmitter secretion	2.64381	BRAF,FMR1	Neurotransmitter signaling
1931	GO: Biological Process	GO:0042137	sequestering of neurotransmitter	GeneOntologyBiologicalProcess_GO:0042137_sequestering of neurotransmitter	1.95737	SLC18A2	Neurotransmitter signaling
2346	Pathway	M4557	Biosynthesis of neurotransmitters	Pathway_M4557_Biosynthesis of neurotransmitters	10	DBH,GAD1,HDC,TH	Neurotransmitter signaling
2351	Pathway	1268778	Neurotransmitter Clearance In The Synaptic Cleft	Pathway_1268778_Neurotransmitter Clearance In The Synaptic Cleft	10	COMT,MAOA,SLC6A3,SLC6A4	Neurotransmitter signaling
2354	Pathway	1268786	Neurotransmitter Receptor Binding And Downstream Transmission In The Postsynaptic Cell	Pathway_1268786_Neurotransmitter Receptor Binding And Downstream Transmission In The Postsynaptic Cell	10	BRAF,CHRNA4,CHRNA7,DLG3,DLG4,GABRA2,GRIA1,GRIA3,GRIK1,GRIK2,GRIN1,GRIN2A,GRIN2B,GRIN2D,PRKCA	Neurotransmitter signaling
2365	Pathway	1268768	Neurotransmitter Release Cycle	Pathway_1268768_Neurotransmitter Release Cycle	10	ABAT,CHAT,GAD1,MAOA,SLC18A2,SLC1A3,SNAP25,SYN1	Neurotransmitter signaling
2341	Pathway	1268763	Neuronal System	Pathway_1268763_Neuronal System	10	ABAT,BRAF,CHAT,CHRNA4,CHRNA7,COMT,DLG3,DLG4,GABRA2,GAD1,GRIA1,GRIA3,GRIK1,GRIK2,GRIN1,GRIN2A,GRIN2B,GRIN2D,KCNAB1,KCND2,KCNMA1,MAOA,NLGN1,PRKCA,SLC18A2,SLC1A3,SLC6A3,SLC6A4,SNAP25,SYN1	Neuronal system
184	GO: Biological Process	GO:0030902	hindbrain development	GeneOntologyBiologicalProcess_GO:0030902_hindbrain development	10	ABAT,AGTR2,ATP2B2,BCL2,CDK5,CDK5R1,CTNNB1,GRIN1,IGF1,MECP2,SLC6A4	Brain development
503	GO: Biological Process	GO:0007420	brain development	GeneOntologyBiologicalProcess_GO:0007420_brain development	10	ABAT,AGTR2,APP,ATP2B2,BCL2,CASP3,CDK5,CDK5R1,CTNNB1,DRD1,DRD2,GRIN1,IGF1,KCNAB1,KRAS,LRRK2,MAPT,MECP2,NKX2-1,NTRK2,PAFAH1B1,PAK1,PEX13,PSEN1,PSEN2,RELN,SLC6A3,SLC6A4,SRR,TH,VLDLR	Brain development
538	GO: Biological Process	GO:0030900	forebrain development	GeneOntologyBiologicalProcess_GO:0030900_forebrain development	10	APP,CASP3,CDK5,CDK5R1,CTNNB1,DRD1,DRD2,GRIN1,KRAS,LRRK2,NKX2-1,NTRK2,PAFAH1B1,PAK1,PEX13,PSEN1,PSEN2,RELN,SLC6A3,SLC6A4,TH,VLDLR	Brain development
19	GO: Biological Process	GO:0043069	negative regulation of programmed cell death	GeneOntologyBiologicalProcess_GO:0043069_negative regulation of programmed cell death	10	ADORA1,ADORA2A,AGT,AGTR2,APOE,AR,BCL2,BDNF,BRAF,CASP3,CTNNB1,GRIK2,GRIN1,IGF1,KRAS,LRRK2,MECP2,NGF,NOS1,NTF4,NTRK1,NTRK2,PRKCA,PSEN1,PSEN2,SNCA,SOD1	Cell death
48	GO: Biological Process	GO:0043068	positive regulation of programmed cell death	GeneOntologyBiologicalProcess_GO:0043068_positive regulation of programmed cell death	10	ACE,ADORA2A,ADRB2,AGT,AGTR2,BCL2,CASP3,CDK5,CDK5R1,CTNNB1,GRIK2,GRIN1,GRIN2A,KALRN,KCNMA1,LRRK2,NGF,NTRK1,PSEN1,PSEN2,SNCA,SOD1	Cell death
416	GO: Biological Process	GO:0010942	positive regulation of cell death	GeneOntologyBiologicalProcess_GO:0010942_positive regulation of cell death	10	ACE,ADORA2A,ADRB2,AGT,AGTR2,APOE,BCL2,CASP3,CDK5,CDK5R1,CTNNB1,GRIK2,GRIN1,GRIN2A,GRIN2B,KALRN,KCNMA1,LRRK2,NGF,NOS1,NTRK1,PSEN1,PSEN2,SNCA,SOD1	Cell death
559	GO: Biological Process	GO:0060548	negative regulation of cell death	GeneOntologyBiologicalProcess_GO:0060548_negative regulation of cell death	10	ADORA1,ADORA2A,AGT,AGTR2,APOE,AR,BCL2,BDNF,BRAF,CASP3,CDK5,CTNNB1,GRIK2,GRIN1,IGF1,KRAS,LRRK2,MECP2,NGB,NGF,NOS1,NPC1,NTF4,NTRK1,NTRK2,PRKCA,PSEN1,PSEN2,SNCA,SOD1	Cell death
599	GO: Biological Process	GO:0010941	regulation of cell death	GeneOntologyBiologicalProcess_GO:0010941_regulation of cell death	10	ACE,ADORA1,ADORA2A,ADRB2,AGT,AGTR2,APOE,AR,BCL2,BDNF,BRAF,CASP3,CDK5,CDK5R1,CTNNB1,DBH,GRIK2,GRIN1,GRIN2A,GRIN2B,GRM7,IGF1,KALRN,KCNMA1,KRAS,LRRK2,MECP2,NGB,NGF,NOS1,NPC1,NTF4,NTRK1,NTRK2,PRKCA,PSEN1,PSEN2,SNCA,SOD1	Cell death
614	GO: Biological Process	GO:0008219	cell death	GeneOntologyBiologicalProcess_GO:0008219_cell death	10	ACE,ADORA1,ADORA2A,ADRB2,AGT,AGTR2,APOE,APP,AR,BCL2,BDNF,BMX,BRAF,CASP3,CDK5,CDK5R1,CTNNB1,DBH,GRIK2,GRIN1,GRIN2A,GRIN2B,GRM7,IGF1,KALRN,KCNMA1,KRAS,LRRK2,MAPT,MECP2,NGB,NGF,NOS1,NPC1,NTF4,NTRK1,NTRK2,PAK1,PRKCA,PSEN1,PSEN2,SNCA,SOD1	Cell death
652	GO: Biological Process	GO:0043067	regulation of programmed cell death	GeneOntologyBiologicalProcess_GO:0043067_regulation of programmed cell death	10	ACE,ADORA1,ADORA2A,ADRB2,AGT,AGTR2,APOE,AR,BCL2,BDNF,BRAF,CASP3,CDK5,CDK5R1,CTNNB1,DBH,GRIK2,GRIN1,GRIN2A,IGF1,KALRN,KCNMA1,KRAS,LRRK2,MECP2,NGF,NOS1,NTF4,NTRK1,NTRK2,PRKCA,PSEN1,PSEN2,SNCA,SOD1	Cell death
680	GO: Biological Process	GO:0012501	programmed cell death	GeneOntologyBiologicalProcess_GO:0012501_programmed cell death	10	ACE,ADORA1,ADORA2A,ADRB2,AGT,AGTR2,APOE,APP,AR,BCL2,BDNF,BMX,BRAF,CASP3,CDK5,CDK5R1,CTNNB1,DBH,GRIK2,GRIN1,GRIN2A,IGF1,KALRN,KCNMA1,KRAS,LRRK2,MAPT,MECP2,NGB,NGF,NOS1,NTF4,NTRK1,NTRK2,PAK1,PRKCA,PSEN1,PSEN2,SNCA,SOD1	Cell death
973	GO: Biological Process	GO:0036473	cell death in response to oxidative stress	GeneOntologyBiologicalProcess_GO:0036473_cell death in response to oxidative stress	4.28141	BCL2,LRRK2,MAPT,NGB,SOD1	Cell death
1207	GO: Biological Process	GO:0046668	regulation of retinal cell programmed cell death	GeneOntologyBiologicalProcess_GO:0046668_regulation of retinal cell programmed cell death	3.34884	BCL2,BDNF	Cell death
1318	GO: Biological Process	GO:0046666	retinal cell programmed cell death	GeneOntologyBiologicalProcess_GO:0046666_retinal cell programmed cell death	2.97334	BCL2,BDNF	Cell death
1468	GO: Biological Process	GO:0010623	programmed cell death involved in cell development	GeneOntologyBiologicalProcess_GO:0010623_programmed cell death involved in cell development	2.62485	BCL2,BDNF,NTRK1	Cell death
1554	GO: Biological Process	GO:1903201	regulation of oxidative stress-induced cell death	GeneOntologyBiologicalProcess_GO:1903201_regulation of oxidative stress-induced cell death	2.45605	LRRK2,NGB,SOD1	Cell death
1757	GO: Biological Process	GO:1903206	negative regulation of hydrogen peroxide-induced cell death	GeneOntologyBiologicalProcess_GO:1903206_negative regulation of hydrogen peroxide-induced cell death	2.2262	LRRK2,NGB	Cell death
1893	GO: Biological Process	GO:1903205	regulation of hydrogen peroxide-induced cell death	GeneOntologyBiologicalProcess_GO:1903205_regulation of hydrogen peroxide-induced cell death	2.01247	LRRK2,NGB	Cell death
1917	GO: Biological Process	GO:0046671	negative regulation of retinal cell programmed cell death	GeneOntologyBiologicalProcess_GO:0046671_negative regulation of retinal cell programmed cell death	1.95737	BCL2	Cell death
2004	GO: Biological Process	GO:0036474	cell death in response to hydrogen peroxide	GeneOntologyBiologicalProcess_GO:0036474_cell death in response to hydrogen peroxide	1.95236	LRRK2,NGB	Cell death
2200	GO: Biological Process	GO:1903202	negative regulation of oxidative stress-induced cell death	GeneOntologyBiologicalProcess_GO:1903202_negative regulation of oxidative stress-induced cell death	1.72791	LRRK2,NGB	Cell death
2502	Pathway	83060	Apoptosis	Pathway_83060_Apoptosis	3.11951	BCL2,CASP3,ITPR3,KRAS,NGF,NTRK1	Cell death
2529	Pathway	M5060	The TNF-type receptor Fas induces apoptosis on ligand binding.	Pathway_M5060_The TNF-type receptor Fas induces apoptosis on ligand binding.	2.67165	BCL2,CASP3	Cell death
2545	Pathway	1269447	Cell death signalling via NRAGE, NRIF and NADE	Pathway_1269447_Cell death signalling via NRAGE, NRIF and NADE	2.48159	CASP3,KALRN,NGF,PSEN2	Cell death
2584	Pathway	1269449	NRIF signals cell death from the nucleus	Pathway_1269449_NRIF signals cell death from the nucleus	2.22012	NGF,PSEN2	Cell death
2587	Pathway	PW:0000009	programmed cell death	Pathway_PW:0000009_programmed cell death	2.22012	BCL2,CASP3	Cell death
2596	Pathway	137974	Caspase cascade in apoptosis	Pathway_137974_Caspase cascade in apoptosis	2.14917	APP,BCL2,CASP3	Cell death
2653	Pathway	M5290	Role of MEF2D in T-cell Apoptosis	Pathway_M5290_Role of MEF2D in T-cell Apoptosis	1.93239	PPP3CB,PRKCA	Cell death
2660	Pathway	1270262	Apoptosis	Pathway_1270262_Apoptosis	1.91959	BCL2,BMX,CASP3,CTNNB1,MAPT	Cell death
2667	Pathway	1270261	Programmed Cell Death	Pathway_1270261_Programmed Cell Death	1.88999	BCL2,BMX,CASP3,CTNNB1,MAPT	Cell death
1055	GO: Biological Process	GO:0050727	regulation of inflammatory response	GeneOntologyBiologicalProcess_GO:0050727_regulation of inflammatory response	3.93803	ACE,ACE2,ADORA1,ADORA2A,ADRB2,AGT,APOE,CHRNA7,PRKCA	Inflammatory response
1230	GO: Biological Process	GO:0050728	negative regulation of inflammatory response	GeneOntologyBiologicalProcess_GO:0050728_negative regulation of inflammatory response	3.2506	ADORA1,ADORA2A,ADRB2,APOE,CHRNA7	Inflammatory response
1418	GO: Biological Process	GO:0006954	inflammatory response	GeneOntologyBiologicalProcess_GO:0006954_inflammatory response	2.7187	ACE,ACE2,ADORA1,ADORA2A,ADRB2,AGT,AGTR2,APOE,CHRNA7,NTRK2,PRKCA	Inflammatory response
2441	Pathway	948277	Inflammatory mediator regulation of TRP channels	Pathway_948277_Inflammatory mediator regulation of TRP channels	3.94652	GNAS,IGF1,ITPR3,NGF,NTRK1,PRKCA	Inflammatory response
2602	Pathway	1269253	Inflammasomes	Pathway_1269253_Inflammasomes	2.11221	APP,BCL2	Inflammatory response
2355	Pathway	1268766	Transmission across Chemical Synapses	Pathway_1268766_Transmission across Chemical Synapses	10	ABAT,BRAF,CHAT,CHRNA4,CHRNA7,COMT,DLG3,DLG4,GABRA2,GAD1,GRIA1,GRIA3,GRIK1,GRIK2,GRIN1,GRIN2A,GRIN2B,GRIN2D,MAOA,PRKCA,SLC18A2,SLC1A3,SLC6A3,SLC6A4,SNAP25,SYN1
1	GO: Biological Process	GO:0031960	response to corticosteroid	GeneOntologyBiologicalProcess_GO:0031960_response to corticosteroid	10	ADRB2,AGTR2,BCL2,CASP3,IGF1,KCNMA1,KRAS,MT-ND3,SLC18A2,TH,TPH2
3	GO: Biological Process	GO:0045935	positive regulation of nucleobase-containing compound metabolic process	GeneOntologyBiologicalProcess_GO:0045935_positive regulation of nucleobase-containing compound metabolic process	10	ADORA2A,ADRB2,AGT,AGTR2,APOE,APP,AR,BDNF,CTNNB1,DRD1,DRD2,DRD3,DRD5,GNAS,GRIN1,IGF1,KRAS,MECP2,NGF,NKX2-1,NOS1,NTRK1,PBX3,PPP3CB,PRKCA,PSEN1,RELN,TSC2
4	GO: Biological Process	GO:0051223	regulation of protein transport	GeneOntologyBiologicalProcess_GO:0051223_regulation of protein transport	10	ABAT,ADORA2A,AGT,AGTR2,CASR,CDK5,CDK5R1,DRD2,DRD3,DRD4,GNAS,IGF1,ITPR3,LRRK2,NOS1,PPP3CB,PRKCA,SNAP25
5	GO: Biological Process	GO:0003015	heart process	GeneOntologyBiologicalProcess_GO:0003015_heart process	10	ACE,ACE2,ADORA1,ADRB2,AGT,AGTR2,ATP2B2,CHRNA7,DRD2,ITPR3,KCND2,NOS1,PRKCA,PSEN2,SOD1,TH
6	GO: Biological Process	GO:0019229	regulation of vasoconstriction	GeneOntologyBiologicalProcess_GO:0019229_regulation of vasoconstriction	10	ACE,ACE2,AGT,CASR,DBH,DRD1,NOS1
7	GO: Biological Process	GO:0007616	long-term memory	GeneOntologyBiologicalProcess_GO:0007616_long-term memory	10	DRD2,GRIA1,GRIN1,MECP2,NTF4,NTRK2,RELN,SNAP25
8	GO: Biological Process	GO:1900371	regulation of purine nucleotide biosynthetic process	GeneOntologyBiologicalProcess_GO:1900371_regulation of purine nucleotide biosynthetic process	10	ADORA2A,ADRB2,APOE,DRD1,DRD2,DRD3,DRD4,DRD5,GNAS,GRM7,NOS1,PRKCA
9	GO: Biological Process	GO:0019233	sensory perception of pain	GeneOntologyBiologicalProcess_GO:0019233_sensory perception of pain	10	ACE,ADORA1,ADRB2,CDK5,CHRNA4,COMT,GRIN1,GRIN2A,GRIN2B,GRIN2D,KCND2,MECP2,NGF,NOS1,NTRK1
10	GO: Biological Process	GO:0043410	positive regulation of MAPK cascade	GeneOntologyBiologicalProcess_GO:0043410_positive regulation of MAPK cascade	10	ADORA1,ADRB2,AGT,AR,BRAF,CHRNA7,CTNNB1,DRD2,DRD4,IGF1,KRAS,LRRK2,NGF,NTRK1,NTRK2,PAK1,PRKCA,PSEN1,SOD1,WWC1
13	GO: Biological Process	GO:0006820	anion transport	GeneOntologyBiologicalProcess_GO:0006820_anion transport	10	ABAT,ACE,ACE2,ADORA1,ADORA2A,AGT,AGTR2,APOE,BDNF,CHRNA4,DRD1,DRD2,DRD3,DRD4,GABRA2,GRIK1,GRIN2B,GRM7,NOS1,NTRK2,PAK1,PSEN1,SLC1A3,SNAP25,SNCA
14	GO: Biological Process	GO:0044281	small molecule metabolic process	GeneOntologyBiologicalProcess_GO:0044281_small molecule metabolic process	10	ABAT,ADH1C,ADORA2A,ADRB2,AGT,APOE,APP,ATP2B2,BDNF,CHAT,COMT,CTNNB1,DBH,DLG3,DLG4,DRD1,DRD2,DRD3,DRD4,DRD5,FAAH,GAD1,GNAS,GRM7,HDC,IGF1,KCNMA1,LRRK2,MECP2,NOS1,NPC1,PAFAH1B1,PEX13,PRKCA,SLC1A3,SNCA,SOD1,SRR,SYNJ1,TH,TPH2,TYR,VLDLR
15	GO: Biological Process	GO:0022610	biological adhesion	GeneOntologyBiologicalProcess_GO:0022610_biological adhesion	10	ABAT,ACE2,ADORA2A,ADRB2,AGT,APP,BCL2,BMX,BRAF,CASP3,CDK5,CDK5R1,CHRNA7,CTNNB1,GNAS,IGF1,IL1RAPL1,NLGN1,PAK1,PPP3CB,PRKCA,PSEN1,PSEN2,RELN,SOD1
16	GO: Biological Process	GO:0032504	multicellular organism reproduction	GeneOntologyBiologicalProcess_GO:0032504_multicellular organism reproduction	10	ACE,ADRB2,AGT,APP,AR,BCL2,CHAT,CHRNA7,COMT,CTNNB1,DBH,DRD1,DRD4,DRD5,GRIN1,IGF1,PAFAH1B1,SLC6A4,SOD1,TH
17	GO: Biological Process	GO:0009605	response to external stimulus	GeneOntologyBiologicalProcess_GO:0009605_response to external stimulus	10	ABAT,ACE,ACE2,ADORA1,ADORA2A,ADRB2,AGT,APOE,APP,ATP2B2,BCL2,BDNF,BRAF,CASP3,CASR,CDK5,CDK5R1,CHAT,CHRNA7,COMT,CTNNB1,DRD1,DRD2,DRD3,FMR1,GRIN1,GRIN2A,GRIN2B,GRIN2D,IGF1,KCNMA1,KRAS,LRRK2,MAPT,MECP2,NKX2-1,NOS1,NPC1,NTRK1,NTRK2,PACS1,PEX13,PRKCA,RELN,SCN1A,SLC18A2,SLC1A3,SLC6A3,SLC6A4,SNCA,SOD1,SRR,TH,TPH2,TSC2,TYR,VLDLR
18	GO: Biological Process	GO:1900273	positive regulation of long-term synaptic potentiation	GeneOntologyBiologicalProcess_GO:1900273_positive regulation of long-term synaptic potentiation	10	DRD1,DRD2,GRIN2A,GRIN2B,NOS1,RELN
20	GO: Biological Process	GO:0009914	hormone transport	GeneOntologyBiologicalProcess_GO:0009914_hormone transport	10	ABAT,ADORA1,AGT,AGTR2,CASR,DRD2,GNAS,ITPR3,NOS1,PPP3CB,PRKCA,SLC18A2,SNAP25
21	GO: Biological Process	GO:0033674	positive regulation of kinase activity	GeneOntologyBiologicalProcess_GO:0033674_positive regulation of kinase activity	10	ACE,ADORA1,ADRB2,AGT,BRAF,CDK5,CDK5R1,CHRNA7,DRD2,DRD4,IGF1,KRAS,LRRK2,NGF,NTRK1,PAK1,PSEN1,RELN,SNCA,SOD1,VLDLR
22	GO: Biological Process	GO:0009449	gamma-aminobutyric acid biosynthetic process	GeneOntologyBiologicalProcess_GO:0009449_gamma-aminobutyric acid biosynthetic process	10	ABAT,GAD1,SLC1A3
23	GO: Biological Process	GO:0051240	positive regulation of multicellular organismal process	GeneOntologyBiologicalProcess_GO:0051240_positive regulation of multicellular organismal process	10	ABAT,ACE,ACE2,ADORA2A,ADRB2,AGT,AGTR2,APOE,AR,BCL2,BDNF,BRAF,CASR,CHRNA7,CTNNB1,DBH,DRD2,DRD3,DRD4,FMR1,GNAS,IGF1,IL1RAPL1,KALRN,KCNMA1,MAPT,MECP2,NGF,NLGN1,NOS1,NTRK1,NTRK2,PAFAH1B1,PRKCA,PSEN1,PSEN2,RELN,SLC6A3,SOD1,SYNJ1,VLDLR
25	GO: Biological Process	GO:0021987	cerebral cortex development	GeneOntologyBiologicalProcess_GO:0021987_cerebral cortex development	10	CDK5,CDK5R1,CTNNB1,GRIN1,NKX2-1,NTRK2,PAFAH1B1,PEX13,PSEN1,RELN,TH,VLDLR
26	GO: Biological Process	GO:0007622	rhythmic behavior	GeneOntologyBiologicalProcess_GO:0007622_rhythmic behavior	10	ADORA1,ADORA2A,CHAT,DRD1,DRD2,DRD3,KCND2,KCNMA1,NLGN1,TH
27	GO: Biological Process	GO:0043085	positive regulation of catalytic activity	GeneOntologyBiologicalProcess_GO:0043085_positive regulation of catalytic activity	10	ACE,ADORA1,ADORA2A,ADRB2,AGT,AGTR2,APOE,APP,BCL2,BRAF,CASP3,CASR,CDK5,CDK5R1,CHRNA7,CTNNB1,DLG4,DRD1,DRD2,DRD4,DRD5,GNAS,GRIN1,GRIN2A,GRIN2B,GRIN2D,IGF1,KALRN,KRAS,LRRK2,NGB,NGF,NOS1,NTRK1,PAK1,PRKCA,PSEN1,PSEN2,RELN,SNCA,SOD1,TSC2,VLDLR
28	GO: Biological Process	GO:0009306	protein secretion	GeneOntologyBiologicalProcess_GO:0009306_protein secretion	10	ABAT,ADORA2A,AGT,AGTR2,CASR,DRD2,DRD3,DRD4,GNAS,IGF1,ITPR3,NOS1,PAFAH1B1,PPP3CB,PRKCA,SLC18A2,SNAP25
29	GO: Biological Process	GO:0035150	regulation of tube size	GeneOntologyBiologicalProcess_GO:0035150_regulation of tube size	10	ACE,ACE2,ADORA1,ADORA2A,ADRB2,AGT,AGTR2,APOE,CASR,DBH,DRD1,DRD5,KCNMA1,NOS1,SLC6A4,SOD1
30	GO: Biological Process	GO:0050905	neuromuscular process	GeneOntologyBiologicalProcess_GO:0050905_neuromuscular process	10	ADORA2A,APP,ATP2B2,DLG4,DRD1,DRD2,DRD3,GRIN1,GRIN2A,GRIN2B,GRIN2D,KCNMA1,MECP2,PAFAH1B1,SCN1A,SLC1A3,SLC6A3
31	GO: Biological Process	GO:0006171	cAMP biosynthetic process	GeneOntologyBiologicalProcess_GO:0006171_cAMP biosynthetic process	10	ADORA2A,ADRB2,DRD1,DRD2,DRD3,DRD4,DRD5,GNAS,GRM7,PRKCA
33	GO: Biological Process	GO:0016482	cytosolic transport	GeneOntologyBiologicalProcess_GO:0016482_cytosolic transport	10	AGTR2,BCL2,BRAF,CDK5,CTNNB1,DRD1,FMR1,IGF1,LRRK2,NGF,NLGN1,NOS1,PPP3CB,PSEN1,SNAP25,SNCA,SYN1,SYNJ1
34	GO: Biological Process	GO:0072593	reactive oxygen species metabolic process	GeneOntologyBiologicalProcess_GO:0072593_reactive oxygen species metabolic process	10	ACE2,AGT,AGTR2,BCL2,DRD5,IGF1,LRRK2,NOS1,SLC18A2,SNCA,SOD1
35	GO: Biological Process	GO:0099504	synaptic vesicle cycle	GeneOntologyBiologicalProcess_GO:0099504_synaptic vesicle cycle	10	BRAF,CDK5,FMR1,LRRK2,NLGN1,PSEN1,SLC18A2,SNAP25,SNCA,SYN1,SYNJ1,TH
36	GO: Biological Process	GO:0040012	regulation of locomotion	GeneOntologyBiologicalProcess_GO:0040012_regulation of locomotion	10	ACE,ADORA1,ADORA2A,AGT,AGTR2,APOE,BCL2,BRAF,CASR,CDK5,DACH1,DRD1,DRD2,DRD3,DRD5,IGF1,LRRK2,NKX2-1,PAK1,PRKCA,RELN,SNCA
37	GO: Biological Process	GO:0021953	central nervous system neuron differentiation	GeneOntologyBiologicalProcess_GO:0021953_central nervous system neuron differentiation	10	ATP2B2,CDK5,CTNNB1,DRD1,DRD2,NKX2-1,NTRK2,PAFAH1B1,PRKCA,PSEN1
38	GO: Biological Process	GO:0042127	regulation of cell proliferation	GeneOntologyBiologicalProcess_GO:0042127_regulation of cell proliferation	10	ACE,ACE2,ADORA1,ADORA2A,ADRB2,AGT,AGTR2,APOE,AR,BCL2,BDNF,BMX,BRAF,CASP3,CASR,CHRNA7,COMT,CTNNB1,DACH1,DBH,DLG3,DRD2,DRD3,GNAS,IGF1,KRAS,LRRK2,MECP2,NGF,NOS1,NTRK1,NTRK2,PAK1,PRKCA,SLC6A4,TSC2
40	GO: Biological Process	GO:0031324	negative regulation of cellular metabolic process	GeneOntologyBiologicalProcess_GO:0031324_negative regulation of cellular metabolic process	10	ACE2,ADORA2A,AGT,APOE,APP,AR,BCL2,CASP3,CDK5,CDK5R1,COMT,CTNNB1,DACH1,DLG3,DLG4,DRD1,DRD2,DRD3,DRD4,DRD5,DYRK1A,FMR1,GRM7,IGF1,LRRK2,MECP2,NGF,NKX2-1,NOS1,NPC1,PAFAH1B1,PRKCA,PSEN1,PSEN2,SLC18A2,SNCA,TSC2,VLDLR,WWC1
41	GO: Biological Process	GO:0070838	divalent metal ion transport	GeneOntologyBiologicalProcess_GO:0070838_divalent metal ion transport	10	ACE,ADORA2A,ADRB2,AGT,ATP2B2,BCL2,CASR,CDK5,CHRNA4,CHRNA7,CTNNB1,DRD1,DRD2,DRD4,FMR1,GRIN1,GRIN2A,GRIN2B,GRM7,IGF1,IL1RAPL1,ITPR3,NGF,NOS1,PSEN1,PSEN2,SNCA
42	GO: Biological Process	GO:0014823	response to activity	GeneOntologyBiologicalProcess_GO:0014823_response to activity	10	AGT,CTNNB1,DRD1,IGF1,NOS1,NTRK1,TH,TPH2
43	GO: Biological Process	GO:0010001	glial cell differentiation	GeneOntologyBiologicalProcess_GO:0010001_glial cell differentiation	10	ADORA2A,AGT,CDK5,CTNNB1,DRD1,DRD3,IGF1,KRAS,MECP2,NKX2-1,NTRK2,RELN,SOD1
44	GO: Biological Process	GO:0002016	regulation of blood volume by renin-angiotensin	GeneOntologyBiologicalProcess_GO:0002016_regulation of blood volume by renin-angiotensin	10	ACE,ACE2,AGT,AGTR2,DRD3,NKX2-1
45	GO: Biological Process	GO:0001508	action potential	GeneOntologyBiologicalProcess_GO:0001508_action potential	10	CHRNA4,CHRNA7,DRD1,FMR1,GRIA1,GRIK2,GRIN2A,GRIN2B,KCND2,KCNMA1,SCN1A
46	GO: Biological Process	GO:0048813	dendrite morphogenesis	GeneOntologyBiologicalProcess_GO:0048813_dendrite morphogenesis	10	CDK5,CDK5R1,DLG4,GRIN1,IL1RAPL1,KALRN,LRRK2,NLGN1,PAFAH1B1,RELN,VLDLR
47	GO: Biological Process	GO:0031401	positive regulation of protein modification process	GeneOntologyBiologicalProcess_GO:0031401_positive regulation of protein modification process	10	ACE,ADORA1,ADRB2,AGT,AGTR2,AR,BCL2,BDNF,BRAF,CDK5,CDK5R1,CHRNA7,CTNNB1,DRD2,DRD4,DYRK1A,FMR1,GNAS,IGF1,KRAS,LRRK2,NGF,NOS1,NTRK1,NTRK2,PAK1,PRKCA,PSEN1,RELN,SNCA,SOD1,VLDLR,WWC1
49	GO: Biological Process	GO:0030810	positive regulation of nucleotide biosynthetic process	GeneOntologyBiologicalProcess_GO:0030810_positive regulation of nucleotide biosynthetic process	10	ADORA2A,ADRB2,APOE,DRD1,DRD5,GNAS,NOS1,PRKCA
50	GO: Biological Process	GO:0007611	learning or memory	GeneOntologyBiologicalProcess_GO:0007611_learning or memory	10	ADRB2,APP,BDNF,BRAF,CASP3,CDK5,CHAT,CHRNA7,COMT,DBH,DLG4,DRD1,DRD2,DRD3,DRD4,DRD5,GRIA1,GRIN1,GRIN2A,GRIN2B,GRM7,IGF1,ITPR3,KALRN,KCNAB1,KRAS,MECP2,NGF,NTF4,NTRK1,NTRK2,PAFAH1B1,PAK1,PPP3CB,PRKCA,PSEN1,PSEN2,RELN,SLC6A4,SNAP25,SYNJ1,TH,VLDLR
51	GO: Biological Process	GO:0055085	transmembrane transport	GeneOntologyBiologicalProcess_GO:0055085_transmembrane transport	10	ACE,AGT,ATP2B2,BCL2,CASR,CHRNA4,CHRNA7,CTNNB1,DLG3,DLG4,DRD1,DRD2,DRD3,DRD4,FMR1,GABRA2,GRIA1,GRIA3,GRIK1,GRIK2,GRIN1,GRIN2A,GRIN2B,GRIN2D,GRM7,IL1RAPL1,ITPR3,KCNAB1,KCND2,KCNMA1,NGF,NLGN1,NOS1,PEX13,PSEN1,RELN,SCN1A,SLC18A2,SLC1A3,SLC6A3,SLC6A4,SNAP25,SNCA
52	GO: Biological Process	GO:0007194	negative regulation of adenylate cyclase activity	GeneOntologyBiologicalProcess_GO:0007194_negative regulation of adenylate cyclase activity	10	DRD2,DRD3,DRD4,GRM7,PRKCA
53	GO: Biological Process	GO:0050880	regulation of blood vessel size	GeneOntologyBiologicalProcess_GO:0050880_regulation of blood vessel size	10	ACE,ACE2,ADORA1,ADORA2A,ADRB2,AGT,AGTR2,APOE,CASR,DBH,DRD1,DRD5,KCNMA1,NOS1,SLC6A4,SOD1
54	GO: Biological Process	GO:0031644	regulation of neurological system process	GeneOntologyBiologicalProcess_GO:0031644_regulation of neurological system process	10	ADORA1,ADRB2,AGT,COMT,FMR1,GRIN2A,GRIN2D,NOS1
55	GO: Biological Process	GO:0019725	cellular homeostasis	GeneOntologyBiologicalProcess_GO:0019725_cellular homeostasis	10	AGT,AGTR2,APOE,APP,ATP2B2,BCL2,CASR,CHRNA7,DLG4,DRD1,DRD2,DRD3,DRD4,DRD5,GRIK2,GRIN1,IGF1,ITPR3,KCNMA1,LRRK2,NGF,NOS1,PPP3CB,PRKCA,PSEN1,PSEN2,SNCA,SOD1,TH
56	GO: Biological Process	GO:0000186	activation of MAPKK activity	GeneOntologyBiologicalProcess_GO:0000186_activation of MAPKK activity	10	ADORA1,BRAF,LRRK2,NGF,NTRK1,PSEN1
57	GO: Biological Process	GO:0045936	negative regulation of phosphate metabolic process	GeneOntologyBiologicalProcess_GO:0045936_negative regulation of phosphate metabolic process	10	ACE2,ADORA2A,APOE,CASP3,DLG3,DRD1,DRD2,DRD3,DRD4,DRD5,GRM7,IGF1,LRRK2,NOS1,PAFAH1B1,PRKCA,PSEN1,PSEN2,SNCA,TSC2
58	GO: Biological Process	GO:1904062	regulation of cation transmembrane transport	GeneOntologyBiologicalProcess_GO:1904062_regulation of cation transmembrane transport	10	AGT,DRD1,DRD2,DRD3,DRD4,FMR1,KCNAB1,NGF,NOS1,SNCA
59	GO: Biological Process	GO:0090066	regulation of anatomical structure size	GeneOntologyBiologicalProcess_GO:0090066_regulation of anatomical structure size	10	ACE,ACE2,ADORA1,ADORA2A,ADRB2,AGT,AGTR2,APOE,ATP2B2,BDNF,CASR,CDK5,CDK5R1,DBH,DRD1,DRD5,KCNMA1,LRRK2,MAPT,NGF,NOS1,PAFAH1B1,SLC6A4,SOD1,TSC2
60	GO: Biological Process	GO:0032989	cellular component morphogenesis	GeneOntologyBiologicalProcess_GO:0032989_cellular component morphogenesis	10	ADORA2A,APOE,APP,AR,ATP2B2,BCL2,BDNF,BRAF,CASP3,CDK5,CDK5R1,CTNNB1,DLG4,DRD2,GRIN1,IL1RAPL1,KALRN,KRAS,LRRK2,MAPT,NGF,NKX2-1,NLGN1,NTF4,NTRK1,NTRK2,PAFAH1B1,PAK1,PPP3CB,PRKCA,PSEN1,RELN,SLC1A3,SOD1,VLDLR
61	GO: Biological Process	GO:0010033	response to organic substance	GeneOntologyBiologicalProcess_GO:0010033_response to organic substance	10	ABAT,ACE,ADH1C,ADORA2A,ADRB2,AGT,AGTR2,APP,AR,BCL2,BDNF,BRAF,CASP3,CDK5,CDK5R1,CHAT,CHRNA4,CHRNA7,COMT,CTNNB1,DBH,DLG4,DRD1,DRD2,DRD3,DRD4,DRD5,FMR1,GNAS,GRIN1,GRIN2A,GRIN2B,IGF1,ITPR3,KALRN,KCNMA1,KRAS,LRRK2,MAPT,MECP2,MT-ND3,NGF,NKX2-1,NOS1,NPC1,NTRK1,NTRK2,PAFAH1B1,PAK1,PPP3CB,PRKCA,SLC18A2,SLC1A3,SLC6A3,SLC6A4,SNCA,SOD1,SRR,SYNJ1,TH,TPH2,TSC2,TYR,VLDLR
62	GO: Biological Process	GO:0050773	regulation of dendrite development	GeneOntologyBiologicalProcess_GO:0050773_regulation of dendrite development	10	APOE,CDK5,CDK5R1,FMR1,GRIN1,IL1RAPL1,KALRN,LRRK2,NLGN1,NTRK2,PAFAH1B1,PSEN1,RELN,VLDLR
64	GO: Biological Process	GO:0038179	neurotrophin signaling pathway	GeneOntologyBiologicalProcess_GO:0038179_neurotrophin signaling pathway	10	AGT,AGTR2,CASP3,NGF,NTRK1,NTRK2
65	GO: Biological Process	GO:0042325	regulation of phosphorylation	GeneOntologyBiologicalProcess_GO:0042325_regulation of phosphorylation	10	ACE,ACE2,ADORA1,ADORA2A,ADRB2,AGT,APOE,APP,AR,BCL2,BDNF,BRAF,CASP3,CDK5,CDK5R1,CHRNA7,CTNNB1,DRD1,DRD2,DRD4,DRD5,FMR1,GNAS,GRIK2,GRIN2B,IGF1,KRAS,LRRK2,NGF,NOS1,NTRK1,NTRK2,PAFAH1B1,PAK1,PRKCA,PSEN1,PSEN2,RELN,SNCA,SOD1,TSC2,VLDLR,WWC1
66	GO: Biological Process	GO:0000902	cell morphogenesis	GeneOntologyBiologicalProcess_GO:0000902_cell morphogenesis	10	ADORA2A,APOE,APP,AR,ATP2B2,BCL2,BDNF,BRAF,CASP3,CDK5,CDK5R1,CTNNB1,DLG4,DRD2,GRIN1,IL1RAPL1,KALRN,KRAS,LRRK2,MAPT,NGF,NKX2-1,NLGN1,NTF4,NTRK1,NTRK2,PAFAH1B1,PAK1,PPP3CB,PRKCA,PSEN1,RELN,SLC1A3,SOD1,VLDLR
67	GO: Biological Process	GO:0043408	regulation of MAPK cascade	GeneOntologyBiologicalProcess_GO:0043408_regulation of MAPK cascade	10	ACE2,ADORA1,ADRB2,AGT,APOE,AR,BRAF,CHRNA7,CTNNB1,DRD2,DRD4,GRIK2,GRIN2B,IGF1,KRAS,LRRK2,NGF,NTRK1,NTRK2,PAFAH1B1,PAK1,PRKCA,PSEN1,SOD1,TSC2,WWC1
68	GO: Biological Process	GO:0007628	adult walking behavior	GeneOntologyBiologicalProcess_GO:0007628_adult walking behavior	10	CHAT,DRD1,DRD2,KCNMA1,MAPT,NPC1,SCN1A
69	GO: Biological Process	GO:0050982	detection of mechanical stimulus	GeneOntologyBiologicalProcess_GO:0050982_detection of mechanical stimulus	10	ATP2B2,GRIN2A,GRIN2B,GRIN2D,IGF1,NTRK1
70	GO: Biological Process	GO:0044703	multi-organism reproductive process	GeneOntologyBiologicalProcess_GO:0044703_multi-organism reproductive process	10	ABAT,ACE,ADRB2,AGT,APP,AR,BCL2,COMT,CTNNB1,DRD1,DRD4,DRD5,GNAS,GRIN1,IGF1,MAPT,NOS1,PAFAH1B1,SLC6A4,SOD1,TH
71	GO: Biological Process	GO:0015696	ammonium transport	GeneOntologyBiologicalProcess_GO:0015696_ammonium transport	10	ABAT,ADORA2A,CHRNA4,DRD1,DRD2,DRD3,DRD4,NOS1,PSEN1,SLC18A2,SLC6A3,SLC6A4,SNCA
73	GO: Biological Process	GO:0050793	regulation of developmental process	GeneOntologyBiologicalProcess_GO:0050793_regulation of developmental process	10	ACE,ADRB2,AGT,AGTR2,APOE,APP,AR,BCL2,BDNF,BRAF,CDK5,CDK5R1,CHRNA7,CTNNB1,DRD2,DRD3,FMR1,GNAS,GRIN1,IGF1,IL1RAPL1,KALRN,KRAS,LRRK2,MAPT,MECP2,NGF,NKX2-1,NLGN1,NOS1,NTF4,NTRK1,NTRK2,PAFAH1B1,PRKCA,PSEN1,RELN,SLC6A3,SLC6A4,SNAP25,SOD1,SYNJ1,VLDLR,WWC1
74	GO: Biological Process	GO:0001932	regulation of protein phosphorylation	GeneOntologyBiologicalProcess_GO:0001932_regulation of protein phosphorylation	10	ACE,ACE2,ADORA1,ADORA2A,ADRB2,AGT,APOE,APP,AR,BCL2,BDNF,BRAF,CASP3,CDK5,CDK5R1,CHRNA7,CTNNB1,DRD1,DRD2,DRD4,DRD5,FMR1,GNAS,GRIK2,GRIN2B,IGF1,KRAS,LRRK2,NGF,NOS1,NTRK1,NTRK2,PAFAH1B1,PAK1,PRKCA,PSEN1,PSEN2,RELN,SNCA,SOD1,TSC2,VLDLR,WWC1
75	GO: Biological Process	GO:0048588	developmental cell growth	GeneOntologyBiologicalProcess_GO:0048588_developmental cell growth	10	AGT,AGTR2,APOE,APP,BDNF,CDK5,CDK5R1,MAPT,NGF,PAFAH1B1,PPP3CB
76	GO: Biological Process	GO:0040013	negative regulation of locomotion	GeneOntologyBiologicalProcess_GO:0040013_negative regulation of locomotion	10	ADORA1,ADORA2A,AGTR2,APOE,BCL2,BRAF,DACH1,DRD1,DRD2,DRD5,NKX2-1
78	GO: Biological Process	GO:0031399	regulation of protein modification process	GeneOntologyBiologicalProcess_GO:0031399_regulation of protein modification process	10	ACE,ACE2,ADORA1,ADORA2A,ADRB2,AGT,AGTR2,APOE,APP,AR,BCL2,BDNF,BRAF,CASP3,CDK5,CDK5R1,CHRNA7,CTNNB1,DLG3,DRD1,DRD2,DRD4,DRD5,DYRK1A,FMR1,GNAS,GRIK2,GRIN2B,IGF1,KRAS,LRRK2,MECP2,NGF,NOS1,NTRK1,NTRK2,PAFAH1B1,PAK1,PRKCA,PSEN1,PSEN2,RELN,SNCA,SOD1,TSC2,VLDLR,WWC1
79	GO: Biological Process	GO:0033993	response to lipid	GeneOntologyBiologicalProcess_GO:0033993_response to lipid	10	ACE,ADH1C,ADRB2,AGTR2,AR,BCL2,BDNF,CASP3,COMT,CTNNB1,DRD1,DRD4,GNAS,IGF1,KCNMA1,KRAS,MECP2,MT-ND3,NKX2-1,NOS1,NPC1,NTRK2,PAK1,PRKCA,SLC18A2,SLC6A4,SNCA,SRR,SYNJ1,TH,TPH2,TYR,VLDLR
80	GO: Biological Process	GO:0023056	positive regulation of signaling	GeneOntologyBiologicalProcess_GO:0023056_positive regulation of signaling	10	ABAT,ADORA1,ADORA2A,ADRB2,AGT,AGTR2,AR,BCL2,BDNF,BRAF,CASR,CHRNA7,CTNNB1,DLG4,DRD1,DRD2,DRD3,DRD4,FMR1,GNAS,GRIA1,GRIK1,GRIK2,GRIN1,GRIN2A,GRIN2B,IGF1,ITPR3,KRAS,LRRK2,MECP2,NGF,NLGN1,NOS1,NTRK1,NTRK2,PAFAH1B1,PAK1,PPP3CB,PRKCA,PSEN1,PSEN2,RELN,SLC1A3,SNAP25,SNCA,SOD1,SYNJ1,WWC1
81	GO: Biological Process	GO:0015844	monoamine transport	GeneOntologyBiologicalProcess_GO:0015844_monoamine transport	10	ABAT,ADORA2A,AGT,AGTR2,CHRNA4,CHRNA7,DRD1,DRD2,DRD3,DRD4,MECP2,NOS1,SLC18A2,SLC6A3,SLC6A4,SNCA
82	GO: Biological Process	GO:0051338	regulation of transferase activity	GeneOntologyBiologicalProcess_GO:0051338_regulation of transferase activity	10	ACE,ADORA1,ADORA2A,ADRB2,AGT,APOE,APP,BRAF,CASP3,CDK5,CDK5R1,CHRNA7,CTNNB1,DRD1,DRD2,DRD4,DRD5,IGF1,KRAS,LRRK2,NGF,NTRK1,PAK1,PRKCA,PSEN1,PSEN2,RELN,SNCA,SOD1,TSC2,VLDLR
83	GO: Biological Process	GO:0072657	protein localization to membrane	GeneOntologyBiologicalProcess_GO:0072657_protein localization to membrane	10	ADORA1,APOE,AR,BCL2,BRAF,CDK5,CDK5R1,DLG3,DLG4,GRIK2,GRIN2B,KALRN,NLGN1,NPC1,PACS1,PAK1,RELN,TSC2
84	GO: Biological Process	GO:0010959	regulation of metal ion transport	GeneOntologyBiologicalProcess_GO:0010959_regulation of metal ion transport	10	ACE,ADORA1,ADORA2A,ADRB2,AGT,ATP2B2,BCL2,CASR,CTNNB1,DRD1,DRD2,DRD3,DRD4,FMR1,GNAS,IGF1,KCNAB1,NGF,NOS1,SNCA
85	GO: Biological Process	GO:0045776	negative regulation of blood pressure	GeneOntologyBiologicalProcess_GO:0045776_negative regulation of blood pressure	10	ABAT,ADORA1,ADRB2,AGTR2,DRD2,DRD3,DRD5,GNAS,NOS1
86	GO: Biological Process	GO:0009187	cyclic nucleotide metabolic process	GeneOntologyBiologicalProcess_GO:0009187_cyclic nucleotide metabolic process	10	ADORA2A,ADRB2,APOE,ATP2B2,DRD1,DRD2,DRD3,DRD4,DRD5,GNAS,GRM7,NOS1,PRKCA
87	GO: Biological Process	GO:0045471	response to ethanol	GeneOntologyBiologicalProcess_GO:0045471_response to ethanol	10	ABAT,ADH1C,CHAT,CHRNA7,DBH,DRD1,DRD2,DRD3,DRD4,GRIN1,GRIN2A,GRIN2B,NKX2-1,NOS1,NTRK1,PRKCA,SLC6A3,SOD1,TH
88	GO: Biological Process	GO:0014074	response to purine-containing compound	GeneOntologyBiologicalProcess_GO:0014074_response to purine-containing compound	10	ADORA2A,APP,BRAF,IGF1,ITPR3,SLC6A3,SLC6A4,SOD1,TYR
89	GO: Biological Process	GO:0009612	response to mechanical stimulus	GeneOntologyBiologicalProcess_GO:0009612_response to mechanical stimulus	10	AGT,ATP2B2,CTNNB1,DRD2,GRIN2A,GRIN2B,GRIN2D,IGF1,NOS1,NTRK1,NTRK2,SLC1A3
90	GO: Biological Process	GO:0098660	inorganic ion transmembrane transport	GeneOntologyBiologicalProcess_GO:0098660_inorganic ion transmembrane transport	10	AGT,ATP2B2,DRD1,DRD2,DRD3,DRD4,FMR1,GABRA2,GRIN1,GRIN2A,GRM7,IL1RAPL1,ITPR3,KCNAB1,KCND2,KCNMA1,NGF,NOS1,PSEN1,SCN1A,SLC6A3,SNAP25,SNCA
91	GO: Biological Process	GO:0021537	telencephalon development	GeneOntologyBiologicalProcess_GO:0021537_telencephalon development	10	CASP3,CDK5,CDK5R1,CTNNB1,DRD1,DRD2,GRIN1,LRRK2,NKX2-1,NTRK2,PAFAH1B1,PEX13,PSEN1,RELN,TH,VLDLR
92	GO: Biological Process	GO:0006898	receptor-mediated endocytosis	GeneOntologyBiologicalProcess_GO:0006898_receptor-mediated endocytosis	10	ADRB2,APOE,CDK5,DLG4,DRD2,DRD3,FMR1,GRIA1,NLGN1,PRKCA,SNCA,SYNJ1,VLDLR
93	GO: Biological Process	GO:0051649	establishment of localization in cell	GeneOntologyBiologicalProcess_GO:0051649_establishment of localization in cell	10	ADORA1,ADORA2A,ADRB2,AGT,AGTR2,APOE,APP,BCL2,BRAF,CDK5,CDK5R1,CHAT,CTNNB1,DRD1,DRD2,DRD3,DRD4,FMR1,GAD1,GNAS,GRIA1,GRIK2,IGF1,ITPR3,LRRK2,MAPT,NGF,NLGN1,NOS1,NPC1,NTRK2,PACS1,PAFAH1B1,PAK1,PEX13,PPP3CB,PSEN1,SLC18A2,SLC1A3,SLC6A3,SLC6A4,SNAP25,SNCA,SOD1,SYN1,SYNJ1,TH,TSC2,WWC1
94	GO: Biological Process	GO:0051962	positive regulation of nervous system development	GeneOntologyBiologicalProcess_GO:0051962_positive regulation of nervous system development	10	ACE,APOE,BCL2,BDNF,BRAF,CTNNB1,DRD2,FMR1,IGF1,IL1RAPL1,KALRN,MAPT,MECP2,NGF,NLGN1,NTRK1,NTRK2,PAFAH1B1,PRKCA,PSEN1,RELN,SYNJ1,VLDLR
95	GO: Biological Process	GO:0018193	peptidyl-amino acid modification	GeneOntologyBiologicalProcess_GO:0018193_peptidyl-amino acid modification	10	ACE,ADORA1,AGT,APP,BCL2,BDNF,BMX,BRAF,CDK5,CDK5R1,CTNNB1,DYRK1A,IGF1,LRRK2,MECP2,NOS1,NTRK1,NTRK2,PAK1,PRKCA,PSEN1,PSEN2,RELN,SNCA
96	GO: Biological Process	GO:0065008	regulation of biological quality	GeneOntologyBiologicalProcess_GO:0065008_regulation of biological quality	10	ABAT,ACE,ACE2,ADH1C,ADORA1,ADORA2A,ADRB2,AGT,AGTR2,APOE,APP,AR,ATP2B2,BCL2,BDNF,BRAF,CASP3,CASR,CDK5,CDK5R1,CHAT,CHRNA4,CHRNA7,COMT,CTNNB1,DBH,DLG4,DRD1,DRD2,DRD3,DRD4,DRD5,FMR1,GABRA2,GAD1,GNAS,GRIA1,GRIK1,GRIK2,GRIN1,GRIN2A,GRIN2B,GRIN2D,IGF1,ITPR3,KCND2,KCNMA1,KRAS,LRRK2,MAOA,MAPT,MECP2,NGF,NKX2-1,NLGN1,NOS1,NPC1,NTRK1,NTRK2,PAFAH1B1,PAK1,PPP3CB,PRKCA,PSEN1,PSEN2,RELN,SCN1A,SLC18A2,SLC1A3,SLC6…
98	GO: Biological Process	GO:0009314	response to radiation	GeneOntologyBiologicalProcess_GO:0009314_response to radiation	10	APP,BCL2,BRAF,CASP3,CDK5,DBH,DRD1,DRD2,DRD3,DRD4,DRD5,FMR1,GRIN1,GRIN2A,KRAS,MECP2,NTRK1,NTRK2,SLC1A3,TH,TYR
99	GO: Biological Process	GO:0031400	negative regulation of protein modification process	GeneOntologyBiologicalProcess_GO:0031400_negative regulation of protein modification process	10	ACE2,ADORA2A,APOE,CASP3,CDK5,CTNNB1,DLG3,DRD1,DRD5,IGF1,LRRK2,MECP2,NOS1,PAFAH1B1,PRKCA,PSEN1,PSEN2,SNCA,TSC2
100	GO: Biological Process	GO:0048013	ephrin receptor signaling pathway	GeneOntologyBiologicalProcess_GO:0048013_ephrin receptor signaling pathway	10	CDK5R1,GRIN1,GRIN2B,KALRN,NTRK1,PAK1,PSEN2
101	GO: Biological Process	GO:1905114	cell surface receptor signaling pathway involved in cell-cell signaling	GeneOntologyBiologicalProcess_GO:1905114_cell surface receptor signaling pathway involved in cell-cell signaling	10	ABAT,ADORA1,ADORA2A,ADRB2,BDNF,CDK5,CHRNA4,CHRNA7,DLG4,DRD2,DRD4,GABRA2,GRIK1,GRIK2,GRIN1,GRIN2A,GRIN2B,GRIN2D,LRRK2,MECP2,NLGN1,RELN,SNCA
102	GO: Biological Process	GO:0060999	positive regulation of dendritic spine development	GeneOntologyBiologicalProcess_GO:0060999_positive regulation of dendritic spine development	10	APOE,FMR1,KALRN,NLGN1,PAFAH1B1,PSEN1,RELN
103	GO: Biological Process	GO:0008016	regulation of heart contraction	GeneOntologyBiologicalProcess_GO:0008016_regulation of heart contraction	10	ACE2,ADORA1,ADRB2,AGT,AGTR2,ATP2B2,CHRNA7,DRD2,ITPR3,KCND2,NOS1,PRKCA,TH
104	GO: Biological Process	GO:0022030	telencephalon glial cell migration	GeneOntologyBiologicalProcess_GO:0022030_telencephalon glial cell migration	10	CDK5,CDK5R1,CTNNB1,PAFAH1B1,RELN
105	GO: Biological Process	GO:0006812	cation transport	GeneOntologyBiologicalProcess_GO:0006812_cation transport	10	ABAT,ACE,ACE2,ADORA1,ADORA2A,ADRB2,AGT,ATP2B2,BCL2,CASR,CDK5,CHRNA4,CHRNA7,CTNNB1,DRD1,DRD2,DRD3,DRD4,FMR1,GNAS,GRIN1,GRIN2A,GRIN2B,GRIN2D,GRM7,IGF1,IL1RAPL1,ITPR3,KCNAB1,KCND2,KCNMA1,NGF,NOS1,PSEN1,PSEN2,SCN1A,SLC18A2,SLC6A3,SLC6A4,SNAP25,SNCA
106	GO: Biological Process	GO:0051347	positive regulation of transferase activity	GeneOntologyBiologicalProcess_GO:0051347_positive regulation of transferase activity	10	ACE,ADORA1,ADRB2,AGT,BRAF,CDK5,CDK5R1,CHRNA7,CTNNB1,DRD2,DRD4,IGF1,KRAS,LRRK2,NGF,NTRK1,PAK1,PSEN1,RELN,SNCA,SOD1,VLDLR
107	GO: Biological Process	GO:0043066	negative regulation of apoptotic process	GeneOntologyBiologicalProcess_GO:0043066_negative regulation of apoptotic process	10	ADORA1,ADORA2A,AGT,AGTR2,APOE,AR,BCL2,BDNF,BRAF,CASP3,CTNNB1,GRIK2,GRIN1,IGF1,KRAS,LRRK2,MECP2,NGF,NOS1,NTF4,NTRK1,NTRK2,PRKCA,PSEN1,PSEN2,SNCA,SOD1
108	GO: Biological Process	GO:0043576	regulation of respiratory gaseous exchange	GeneOntologyBiologicalProcess_GO:0043576_regulation of respiratory gaseous exchange	10	ADORA1,GRIN1,MECP2,NLGN1,PBX3
109	GO: Biological Process	GO:0050770	regulation of axonogenesis	GeneOntologyBiologicalProcess_GO:0050770_regulation of axonogenesis	10	APOE,BDNF,BRAF,CDK5,CDK5R1,GRIN1,MAPT,NGF,NTRK2,PAFAH1B1,PSEN1
110	GO: Biological Process	GO:0043524	negative regulation of neuron apoptotic process	GeneOntologyBiologicalProcess_GO:0043524_negative regulation of neuron apoptotic process	10	ADORA2A,AGT,AGTR2,APOE,BCL2,BDNF,BRAF,GRIK2,GRIN1,KRAS,MECP2,NGF,NTF4,NTRK1,NTRK2,PSEN1,SNCA,SOD1
111	GO: Biological Process	GO:0035176	social behavior	GeneOntologyBiologicalProcess_GO:0035176_social behavior	10	DLG4,DRD1,DRD3,DRD4,GAD1,GRIN1,KALRN,KRAS,MECP2,PPP3CB,SLC6A4,TH
112	GO: Biological Process	GO:0051952	regulation of amine transport	GeneOntologyBiologicalProcess_GO:0051952_regulation of amine transport	10	ABAT,ADORA1,ADORA2A,AGT,AGTR2,CHRNA4,CHRNA7,DRD1,DRD2,DRD3,DRD4,GRIK1,GRIN2B,GRM7,SNCA
113	GO: Biological Process	GO:0009966	regulation of signal transduction	GeneOntologyBiologicalProcess_GO:0009966_regulation of signal transduction	10	ABAT,ACE2,ADORA1,ADORA2A,ADRB2,AGT,AGTR2,APOE,APP,AR,BCL2,BDNF,BRAF,CDK5,CDK5R1,CHRNA4,CHRNA7,CTNNB1,DBH,DLG4,DRD2,DRD3,DRD4,DYRK1A,GNAS,GRIK2,GRIN1,GRIN2A,GRIN2B,IGF1,KALRN,KRAS,LRRK2,NGF,NKX2-1,NLGN1,NOS1,NTRK1,NTRK2,PAFAH1B1,PAK1,PRKCA,PSEN1,PSEN2,RELN,SNCA,SOD1,TSC2,WWC1
114	GO: Biological Process	GO:0034762	regulation of transmembrane transport	GeneOntologyBiologicalProcess_GO:0034762_regulation of transmembrane transport	10	ACE,AGT,BCL2,CASR,CHRNA4,CTNNB1,DLG4,DRD1,DRD2,DRD3,DRD4,FMR1,GRIK1,GRIN1,GRIN2A,GRIN2D,KCNAB1,KCND2,KCNMA1,NGF,NLGN1,NOS1,RELN,SCN1A,SNCA
115	GO: Biological Process	GO:0007631	feeding behavior	GeneOntologyBiologicalProcess_GO:0007631_feeding behavior	10	ACE,ACE2,ADORA2A,AGT,APP,BDNF,DACH1,DRD1,DRD2,GRIN1,GRIN2B,GRM7,NKX2-1,NTRK2,PEX13,TH
116	GO: Biological Process	GO:0006835	dicarboxylic acid transport	GeneOntologyBiologicalProcess_GO:0006835_dicarboxylic acid transport	10	ABAT,ADORA1,ADORA2A,BDNF,GRIN2B,GRM7,NTRK2,PAK1,PSEN1,SLC1A3,SNAP25,SNCA
117	GO: Biological Process	GO:1901698	response to nitrogen compound	GeneOntologyBiologicalProcess_GO:1901698_response to nitrogen compound	10	ABAT,ADORA2A,ADRB2,AGT,AGTR2,APP,BCL2,BRAF,CASP3,CDK5,CDK5R1,CHRNA4,CHRNA7,CTNNB1,DBH,DLG4,DRD1,DRD2,DRD3,DRD4,DRD5,FMR1,GNAS,GRIN1,GRIN2A,IGF1,ITPR3,KALRN,LRRK2,NOS1,NTRK1,NTRK2,PAK1,PRKCA,SLC18A2,SLC1A3,SLC6A3,SLC6A4,SNCA,SOD1,SRR,TH,TSC2,TYR,VLDLR
118	GO: Biological Process	GO:0019336	phenol-containing compound catabolic process	GeneOntologyBiologicalProcess_GO:0019336_phenol-containing compound catabolic process	10	COMT,DBH,MAOA,SLC6A3
120	GO: Biological Process	GO:0006865	amino acid transport	GeneOntologyBiologicalProcess_GO:0006865_amino acid transport	10	ABAT,ACE2,ADORA1,ADORA2A,AGT,BDNF,GRIK1,GRIN2B,GRM7,NTRK2,PAK1,PSEN1,SLC1A3,SNAP25,SNCA
121	GO: Biological Process	GO:0051173	positive regulation of nitrogen compound metabolic process	GeneOntologyBiologicalProcess_GO:0051173_positive regulation of nitrogen compound metabolic process	10	ABAT,ADORA2A,ADRB2,AGT,AGTR2,APOE,APP,AR,BDNF,COMT,CTNNB1,DRD1,DRD2,DRD3,DRD5,FMR1,GNAS,GRIN1,IGF1,KRAS,MECP2,NGF,NKX2-1,NOS1,NTRK1,PBX3,PPP3CB,PRKCA,PSEN1,RELN,TSC2
122	GO: Biological Process	GO:0032269	negative regulation of cellular protein metabolic process	GeneOntologyBiologicalProcess_GO:0032269_negative regulation of cellular protein metabolic process	10	ACE2,ADORA2A,AGT,APOE,APP,CASP3,CDK5,CTNNB1,DLG3,DRD1,DRD5,FMR1,IGF1,LRRK2,MECP2,NGF,NOS1,PAFAH1B1,PRKCA,PSEN1,PSEN2,SNCA,TSC2
123	GO: Biological Process	GO:0050790	regulation of catalytic activity	GeneOntologyBiologicalProcess_GO:0050790_regulation of catalytic activity	10	ACE,ADORA1,ADORA2A,ADRB2,AGT,AGTR2,APOE,APP,AR,BCL2,BRAF,CASP3,CASR,CDK5,CDK5R1,CHRNA7,CTNNB1,DLG3,DLG4,DRD1,DRD2,DRD3,DRD4,DRD5,GNAS,GRIN1,GRIN2A,GRIN2B,GRIN2D,GRM7,IGF1,KALRN,KRAS,LRRK2,NGB,NGF,NOS1,NTRK1,NTRK2,PAFAH1B1,PAK1,PRKCA,PSEN1,PSEN2,RELN,SNCA,SOD1,TSC2,VLDLR
124	GO: Biological Process	GO:1901564	organonitrogen compound metabolic process	GeneOntologyBiologicalProcess_GO:1901564_organonitrogen compound metabolic process	10	ABAT,ACE,ACE2,ADORA2A,ADRB2,AGT,AGTR2,APOE,APP,ATP2B2,BACE1,BDNF,CHAT,COMT,DBH,DLG3,DLG4,DRD1,DRD2,DRD3,DRD4,DRD5,FMR1,GAD1,GNAS,GRIN2A,GRM7,HDC,IGF1,LRRK2,MAOA,MECP2,NGF,NOS1,PAFAH1B1,PRKCA,PSEN1,PSEN2,RELN,SLC1A3,SLC6A3,SNCA,SOD1,SRR,TH,TPH2,TYR
125	GO: Biological Process	GO:0033135	regulation of peptidyl-serine phosphorylation	GeneOntologyBiologicalProcess_GO:0033135_regulation of peptidyl-serine phosphorylation	10	AGT,BCL2,BDNF,BRAF,NOS1,NTRK2,PAK1,SNCA
126	GO: Biological Process	GO:0042752	regulation of circadian rhythm	GeneOntologyBiologicalProcess_GO:0042752_regulation of circadian rhythm	10	ADORA1,ADORA2A,DRD1,DRD2,DRD3,DRD4,NKX2-1,NLGN1
127	GO: Biological Process	GO:0007568	aging	GeneOntologyBiologicalProcess_GO:0007568_aging	10	ABAT,ADRB2,AGT,APOE,BCL2,IGF1,KRAS,LRRK2,NOS1,NTRK1,NTRK2,SLC18A2,SLC6A3,SNCA,SOD1,SRR,TH
128	GO: Biological Process	GO:0006873	cellular ion homeostasis	GeneOntologyBiologicalProcess_GO:0006873_cellular ion homeostasis	10	AGT,AGTR2,APOE,APP,ATP2B2,BCL2,CASR,CHRNA7,DLG4,DRD1,DRD2,DRD3,DRD4,DRD5,GRIK2,GRIN1,ITPR3,KCNMA1,LRRK2,NGF,NOS1,PRKCA,PSEN1,PSEN2,SNCA,SOD1
130	GO: Biological Process	GO:0001967	suckling behavior	GeneOntologyBiologicalProcess_GO:0001967_suckling behavior	10	APP,DACH1,GRIN1,GRIN2B,PEX13
131	GO: Biological Process	GO:0090257	regulation of muscle system process	GeneOntologyBiologicalProcess_GO:0090257_regulation of muscle system process	10	ABAT,ACE2,ADORA1,ADRB2,AGT,IGF1,KCNMA1,NOS1,PRKCA,SOD1
132	GO: Biological Process	GO:0048754	branching morphogenesis of an epithelial tube	GeneOntologyBiologicalProcess_GO:0048754_branching morphogenesis of an epithelial tube	10	AGT,AGTR2,AR,BCL2,CASR,CTNNB1,IGF1,KRAS,NKX2-1,PAK1
133	GO: Biological Process	GO:0055065	metal ion homeostasis	GeneOntologyBiologicalProcess_GO:0055065_metal ion homeostasis	10	ADORA1,ADORA2A,AGT,AGTR2,APOE,APP,ATP2B2,BCL2,CASR,CHRNA7,COMT,DLG4,DRD1,DRD2,DRD3,DRD4,DRD5,GNAS,GRIK2,GRIN1,ITPR3,KCNMA1,NGF,NOS1,PRKCA,PSEN1,PSEN2,SNCA,SOD1
134	GO: Biological Process	GO:0044248	cellular catabolic process	GeneOntologyBiologicalProcess_GO:0044248_cellular catabolic process	10	ABAT,ACE,ACE2,ADRB2,APOE,BCL2,CASP3,CDK5,CDK5R1,COMT,CTNNB1,DBH,DRD1,FAAH,FMR1,GAD1,HDC,IGF1,LRRK2,MAOA,MAPT,NOS1,NPC1,PEX13,PSEN1,PSEN2,SLC6A3,SNCA,TSC2
135	GO: Biological Process	GO:0071407	cellular response to organic cyclic compound	GeneOntologyBiologicalProcess_GO:0071407_cellular response to organic cyclic compound	10	AGTR2,APP,AR,BDNF,CASP3,CTNNB1,DRD1,DRD5,GNAS,IGF1,ITPR3,LRRK2,MT-ND3,NOS1,NPC1,NTRK1,NTRK2,PAK1,SLC6A4,SNCA,SOD1,TH
136	GO: Biological Process	GO:0060997	dendritic spine morphogenesis	GeneOntologyBiologicalProcess_GO:0060997_dendritic spine morphogenesis	10	CDK5,CDK5R1,DLG4,KALRN,LRRK2,NLGN1,PAFAH1B1,RELN
137	GO: Biological Process	GO:0098657	import into cell	GeneOntologyBiologicalProcess_GO:0098657_import into cell	10	AGT,DRD1,DRD2,DRD3,DRD4,NOS1,SLC1A3,SLC6A3,SLC6A4,SNAP25,SNCA
138	GO: Biological Process	GO:0009967	positive regulation of signal transduction	GeneOntologyBiologicalProcess_GO:0009967_positive regulation of signal transduction	10	ABAT,ADORA1,ADORA2A,ADRB2,AGT,AGTR2,AR,BCL2,BDNF,BRAF,CHRNA7,CTNNB1,DLG4,DRD2,DRD3,DRD4,GNAS,GRIN1,GRIN2A,IGF1,KRAS,LRRK2,NGF,NLGN1,NOS1,NTRK1,NTRK2,PAFAH1B1,PAK1,PRKCA,PSEN1,PSEN2,RELN,SOD1,WWC1
139	GO: Biological Process	GO:1903530	regulation of secretion by cell	GeneOntologyBiologicalProcess_GO:1903530_regulation of secretion by cell	10	ABAT,ADORA1,ADORA2A,AGT,AGTR2,BRAF,CASR,CDK5,CHRNA4,CHRNA7,DRD2,DRD3,DRD4,FMR1,GNAS,GRIN2B,GRM7,IGF1,IL1RAPL1,ITPR3,LRRK2,NGF,NLGN1,NOS1,NTRK2,PPP3CB,PRKCA,SNAP25,SNCA,SYN1
140	GO: Biological Process	GO:0045595	regulation of cell differentiation	GeneOntologyBiologicalProcess_GO:0045595_regulation of cell differentiation	10	ACE,AGT,APOE,APP,AR,BCL2,BDNF,BRAF,CDK5,CDK5R1,CTNNB1,DRD2,DRD3,FMR1,GNAS,GRIN1,IGF1,IL1RAPL1,KALRN,KRAS,LRRK2,MAPT,MECP2,NGF,NKX2-1,NLGN1,NOS1,NTF4,NTRK1,NTRK2,PAFAH1B1,PRKCA,PSEN1,RELN,SLC6A4,SNAP25,SOD1,SYNJ1,VLDLR
141	GO: Biological Process	GO:0010469	regulation of receptor activity	GeneOntologyBiologicalProcess_GO:0010469_regulation of receptor activity	10	ADORA1,APP,CDK5,CHRNA4,DLG4,NLGN1,NOS1,PSEN1,PSEN2,RELN
142	GO: Biological Process	GO:0022410	circadian sleep/wake cycle process	GeneOntologyBiologicalProcess_GO:0022410_circadian sleep/wake cycle process	10	ADORA1,ADORA2A,DRD1,DRD2,DRD3,NLGN1
143	GO: Biological Process	GO:0009416	response to light stimulus	GeneOntologyBiologicalProcess_GO:0009416_response to light stimulus	10	APP,BCL2,BRAF,CASP3,CDK5,DBH,DRD1,DRD2,DRD3,DRD4,DRD5,FMR1,GRIN1,GRIN2A,KRAS,MECP2,NTRK2,SLC1A3,TH,TYR
144	GO: Biological Process	GO:0030336	negative regulation of cell migration	GeneOntologyBiologicalProcess_GO:0030336_negative regulation of cell migration	10	ADORA1,AGTR2,APOE,BCL2,BRAF,DACH1,DRD1,DRD2,DRD5,NKX2-1
145	GO: Biological Process	GO:0051098	regulation of binding	GeneOntologyBiologicalProcess_GO:0051098_regulation of binding	10	ACE,ADRB2,APP,BCL2,CDK5,CTNNB1,FMR1,IGF1,LRRK2,NGF,PACS1,PSEN1,PSEN2
146	GO: Biological Process	GO:0051954	positive regulation of amine transport	GeneOntologyBiologicalProcess_GO:0051954_positive regulation of amine transport	10	ABAT,ADORA2A,AGT,CHRNA4,DRD2,DRD4,GRIK1,GRIN2B
147	GO: Biological Process	GO:0051049	regulation of transport	GeneOntologyBiologicalProcess_GO:0051049_regulation of transport	10	ABAT,ACE,ADORA1,ADORA2A,ADRB2,AGT,AGTR2,APOE,ATP2B2,BCL2,BRAF,CASR,CDK5,CDK5R1,CHRNA4,CHRNA7,COMT,CTNNB1,DLG4,DRD1,DRD2,DRD3,DRD4,FMR1,GNAS,GRIK1,GRIN1,GRIN2A,GRIN2B,GRIN2D,GRM7,IGF1,IL1RAPL1,ITPR3,KCNAB1,KCND2,KCNMA1,LRRK2,MAPT,NGF,NLGN1,NOS1,NTRK2,PPP3CB,PRKCA,RELN,SCN1A,SLC18A2,SNAP25,SNCA,SYN1,SYNJ1,TSC2,WWC1
148	GO: Biological Process	GO:0006753	nucleoside phosphate metabolic process	GeneOntologyBiologicalProcess_GO:0006753_nucleoside phosphate metabolic process	10	ADORA2A,ADRB2,APOE,ATP2B2,BDNF,DLG3,DLG4,DRD1,DRD2,DRD3,DRD4,DRD5,GNAS,GRM7,IGF1,LRRK2,MECP2,NOS1,PRKCA,SNCA
149	GO: Biological Process	GO:0051402	neuron apoptotic process	GeneOntologyBiologicalProcess_GO:0051402_neuron apoptotic process	10	ADORA2A,AGT,AGTR2,APOE,APP,BCL2,BDNF,BRAF,CASP3,CDK5,CDK5R1,CTNNB1,GRIK2,GRIN1,KCNMA1,KRAS,MECP2,NGF,NTF4,NTRK1,NTRK2,PSEN1,SNCA,SOD1
150	GO: Biological Process	GO:0048584	positive regulation of response to stimulus	GeneOntologyBiologicalProcess_GO:0048584_positive regulation of response to stimulus	10	ABAT,ACE,ADORA1,ADORA2A,ADRB2,AGT,AGTR2,AR,BCL2,BDNF,BRAF,CASR,CHRNA7,CTNNB1,DLG4,DRD1,DRD2,DRD3,DRD4,FMR1,GNAS,GRIN1,GRIN2A,IGF1,KRAS,LRRK2,NGF,NLGN1,NOS1,NTRK1,NTRK2,PAFAH1B1,PAK1,PPP3CB,PRKCA,PSEN1,PSEN2,RELN,SNCA,SOD1,TSC2,WWC1
152	GO: Biological Process	GO:0050954	sensory perception of mechanical stimulus	GeneOntologyBiologicalProcess_GO:0050954_sensory perception of mechanical stimulus	10	ATP2B2,CASP3,GRIN2A,GRIN2B,GRIN2D,GRM7,IGF1,KCNMA1,NTRK1,SLC1A3,SOD1,TH
153	GO: Biological Process	GO:0007270	neuron-neuron synaptic transmission	GeneOntologyBiologicalProcess_GO:0007270_neuron-neuron synaptic transmission	10	ADORA1,ADORA2A,ADRB2,BDNF,CDK5,CHRNA7,DRD1,DRD2,DRD3,DRD4,DRD5,GRIK1,GRIK2,GRIN1,GRIN2D,GRM7,KALRN,KRAS,LRRK2,NLGN1,NTRK1,NTRK2,PAK1,PSEN1,RELN,SLC6A3,SLC6A4,SNCA,TH
154	GO: Biological Process	GO:0040008	regulation of growth	GeneOntologyBiologicalProcess_GO:0040008_regulation of growth	10	ADRB2,AGT,AGTR2,APOE,APP,AR,BCL2,BDNF,CDK5,CDK5R1,DRD2,DRD3,GNAS,IGF1,MAPT,NGF,PAFAH1B1,SLC6A3,SLC6A4,SOD1,WWC1
155	GO: Biological Process	GO:0009991	response to extracellular stimulus	GeneOntologyBiologicalProcess_GO:0009991_response to extracellular stimulus	10	ADRB2,APOE,BCL2,CASP3,CDK5,CDK5R1,CHAT,CHRNA7,COMT,DRD1,IGF1,LRRK2,MAPT,NOS1,NPC1,NTRK1,SLC18A2,SLC6A4,SOD1,TH,TPH2,TSC2,TYR,VLDLR
156	GO: Biological Process	GO:0043434	response to peptide hormone	GeneOntologyBiologicalProcess_GO:0043434_response to peptide hormone	10	AGT,AGTR2,BRAF,CTNNB1,DRD1,GNAS,IGF1,NOS1,PAK1,PRKCA,TH,TSC2,VLDLR
157	GO: Biological Process	GO:0014072	response to isoquinoline alkaloid	GeneOntologyBiologicalProcess_GO:0014072_response to isoquinoline alkaloid	10	DRD1,DRD2,DRD3,GRIN1,SRR
158	GO: Biological Process	GO:0045184	establishment of protein localization	GeneOntologyBiologicalProcess_GO:0045184_establishment of protein localization	10	ABAT,ADORA1,ADORA2A,AGT,AGTR2,APOE,AR,BCL2,BRAF,CASR,CDK5,CDK5R1,CTNNB1,DLG4,DRD1,DRD2,DRD3,DRD4,GNAS,GRIK2,IGF1,ITPR3,LRRK2,NLGN1,NOS1,NPC1,PACS1,PAFAH1B1,PEX13,PPP3CB,PRKCA,PSEN1,PSEN2,SLC18A2,SNAP25,TSC2,VLDLR
159	GO: Biological Process	GO:0030534	adult behavior	GeneOntologyBiologicalProcess_GO:0030534_adult behavior	10	ABAT,ADH1C,APP,CDK5,CHAT,CHRNA4,CHRNA7,DBH,DRD1,DRD2,DRD3,DRD4,GRIK1,GRIN1,GRIN2D,GRM7,KALRN,KCNMA1,MAPT,MECP2,NGF,NOS1,NPC1,NTF4,PAFAH1B1,PBX3,SCN1A,SNCA
160	GO: Biological Process	GO:0042493	response to drug	GeneOntologyBiologicalProcess_GO:0042493_response to drug	10	ABAT,BCL2,BDNF,BRAF,CASP3,CHAT,COMT,CTNNB1,DRD1,DRD2,DRD3,GAD1,GNAS,GRIN2A,NOS1,NPC1,NTRK1,PPP3CB,SLC18A2,SLC1A3,SLC6A3,SLC6A4,SNCA,SOD1,SRR,TH,VLDLR
161	GO: Biological Process	GO:0003044	regulation of systemic arterial blood pressure mediated by a chemical signal	GeneOntologyBiologicalProcess_GO:0003044_regulation of systemic arterial blood pressure mediated by a chemical signal	10	ACE,ACE2,ADRB2,AGT,AGTR2,DRD3,DRD5,NKX2-1
162	GO: Biological Process	GO:0090659	walking behavior	GeneOntologyBiologicalProcess_GO:0090659_walking behavior	10	CHAT,DRD1,DRD2,KCNMA1,MAPT,NPC1,SCN1A
163	GO: Biological Process	GO:1900542	regulation of purine nucleotide metabolic process	GeneOntologyBiologicalProcess_GO:1900542_regulation of purine nucleotide metabolic process	10	ADORA2A,ADRB2,APOE,DRD1,DRD2,DRD3,DRD4,DRD5,GNAS,GRM7,IGF1,NOS1,PRKCA,SNCA
164	GO: Biological Process	GO:0033036	macromolecule localization	GeneOntologyBiologicalProcess_GO:0033036_macromolecule localization	10	ABAT,ACE,ADORA1,ADORA2A,AGT,AGTR2,APOE,AR,BCL2,BRAF,CASR,CDK5,CDK5R1,CTNNB1,DLG3,DLG4,DRD1,DRD2,DRD3,DRD4,FMR1,GNAS,GRIK2,GRIN2A,GRIN2B,IGF1,ITPR3,KALRN,LRRK2,MECP2,NLGN1,NOS1,NPC1,PACS1,PAFAH1B1,PAK1,PEX13,PPP3CB,PRKCA,PSEN1,PSEN2,RELN,SLC18A2,SNAP25,TSC2,VLDLR
165	GO: Biological Process	GO:0050805	negative regulation of synaptic transmission	GeneOntologyBiologicalProcess_GO:0050805_negative regulation of synaptic transmission	10	ADORA1,BDNF,BRAF,DRD1,DRD2,DRD5,FMR1,GRIA1,GRIK1,GRIK2,LRRK2,MAPT,NOS1,SLC6A4,SNCA
166	GO: Biological Process	GO:0015874	norepinephrine transport	GeneOntologyBiologicalProcess_GO:0015874_norepinephrine transport	10	ADORA2A,AGT,AGTR2,CHRNA7,SNCA
167	GO: Biological Process	GO:0043393	regulation of protein binding	GeneOntologyBiologicalProcess_GO:0043393_regulation of protein binding	10	ACE,ADRB2,APP,BCL2,CDK5,LRRK2,NGF,PACS1,PSEN1,PSEN2
168	GO: Biological Process	GO:0006468	protein phosphorylation	GeneOntologyBiologicalProcess_GO:0006468_protein phosphorylation	10	ACE,ACE2,ADORA1,ADORA2A,ADRB2,AGT,ANKK1,APOE,APP,AR,BCL2,BDNF,BMX,BRAF,CASP3,CASR,CDK5,CDK5R1,CHRNA7,CTNNB1,DLG4,DRD1,DRD2,DRD4,DRD5,DYRK1A,FMR1,GNAS,GRIK2,GRIN1,GRIN2A,GRIN2B,GRIN2D,IGF1,KALRN,KRAS,LRRK2,NGF,NOS1,NTRK1,NTRK2,PAFAH1B1,PAK1,PPP3CB,PRKCA,PSEN1,PSEN2,RELN,SNCA,SOD1,TSC2,VLDLR,WWC1
169	GO: Biological Process	GO:1901135	carbohydrate derivative metabolic process	GeneOntologyBiologicalProcess_GO:1901135_carbohydrate derivative metabolic process	10	ADORA2A,ADRB2,APOE,ATP2B2,BCL2,BDNF,CTNNB1,DLG3,DLG4,DRD1,DRD2,DRD3,DRD4,DRD5,GNAS,GRM7,IGF1,LRRK2,MECP2,NOS1,NPC1,PRKCA,PSEN1,SNCA,TH
170	GO: Biological Process	GO:0043113	receptor clustering	GeneOntologyBiologicalProcess_GO:0043113_receptor clustering	10	APOE,CDK5,DLG3,DLG4,GRIK2,GRIN2B,NLGN1,PAK1,RELN
171	GO: Biological Process	GO:0061024	membrane organization	GeneOntologyBiologicalProcess_GO:0061024_membrane organization	10	ADORA1,APOE,AR,BCL2,BRAF,CDK5,CDK5R1,DLG3,DLG4,GRIA1,GRIK2,GRIN2B,IL1RAPL1,KALRN,NLGN1,NPC1,PACS1,PAFAH1B1,PAK1,PRKCA,RELN,SNAP25,SNCA,SOD1,TSC2
173	GO: Biological Process	GO:1901616	organic hydroxy compound catabolic process	GeneOntologyBiologicalProcess_GO:1901616_organic hydroxy compound catabolic process	10	ADH1C,APOE,COMT,DBH,MAOA,SLC6A3,SYNJ1
174	GO: Biological Process	GO:0097305	response to alcohol	GeneOntologyBiologicalProcess_GO:0097305_response to alcohol	10	ABAT,ADH1C,ADRB2,AGTR2,CASP3,CHAT,CHRNA7,CTNNB1,DBH,DRD1,DRD2,DRD3,DRD4,GRIN1,GRIN2A,GRIN2B,IGF1,MECP2,NKX2-1,NOS1,NTRK1,PRKCA,SLC18A2,SLC6A3,SLC6A4,SOD1,TH,TYR
175	GO: Biological Process	GO:0010562	positive regulation of phosphorus metabolic process	GeneOntologyBiologicalProcess_GO:0010562_positive regulation of phosphorus metabolic process	10	ACE,ADORA1,ADORA2A,ADRB2,AGT,AGTR2,APOE,AR,BCL2,BDNF,BRAF,CDK5,CDK5R1,CHRNA7,CTNNB1,DRD1,DRD2,DRD4,DRD5,FMR1,GNAS,IGF1,KRAS,LRRK2,NGF,NOS1,NTRK1,NTRK2,PAK1,PRKCA,PSEN1,RELN,SNCA,SOD1,VLDLR,WWC1
176	GO: Biological Process	GO:0040014	regulation of multicellular organism growth	GeneOntologyBiologicalProcess_GO:0040014_regulation of multicellular organism growth	10	ADRB2,AGT,APP,BCL2,DRD2,DRD3,GNAS,IGF1,SLC6A3,SOD1
177	GO: Biological Process	GO:0010605	negative regulation of macromolecule metabolic process	GeneOntologyBiologicalProcess_GO:0010605_negative regulation of macromolecule metabolic process	10	ACE,ACE2,ADORA2A,AGT,APOE,APP,AR,CASP3,CDK5,CDK5R1,CTNNB1,DACH1,DLG3,DLG4,DRD1,DRD3,DRD5,DYRK1A,FMR1,GRIN2A,IGF1,LRRK2,MECP2,NGF,NKX2-1,NOS1,PAFAH1B1,PRKCA,PSEN1,PSEN2,SNCA,TSC2,VLDLR,WWC1
178	GO: Biological Process	GO:0008361	regulation of cell size	GeneOntologyBiologicalProcess_GO:0008361_regulation of cell size	10	APOE,ATP2B2,BDNF,CDK5,CDK5R1,KCNMA1,MAPT,NGF,PAFAH1B1,TSC2
179	GO: Biological Process	GO:0019220	regulation of phosphate metabolic process	GeneOntologyBiologicalProcess_GO:0019220_regulation of phosphate metabolic process	10	ACE,ACE2,ADORA1,ADORA2A,ADRB2,AGT,AGTR2,APOE,APP,AR,BCL2,BDNF,BRAF,CASP3,CDK5,CDK5R1,CHRNA7,CTNNB1,DLG3,DRD1,DRD2,DRD3,DRD4,DRD5,FMR1,GNAS,GRIK2,GRIN2B,GRM7,IGF1,KRAS,LRRK2,NGF,NOS1,NTRK1,NTRK2,PAFAH1B1,PAK1,PRKCA,PSEN1,PSEN2,RELN,SNCA,SOD1,TSC2,VLDLR,WWC1
180	GO: Biological Process	GO:0030154	cell differentiation	GeneOntologyBiologicalProcess_GO:0030154_cell differentiation	10	ACE,ADORA2A,ADRB2,AGT,AGTR2,APOE,APP,AR,ATP2B2,BCL2,BDNF,BMX,BRAF,CASP3,CDK5,CDK5R1,CHAT,CTNNB1,DLG4,DRD1,DRD2,DRD3,FMR1,GNAS,GRIN1,GRIN2A,IGF1,IL1RAPL1,KALRN,KCNAB1,KCNMA1,KRAS,LRRK2,MAPT,MECP2,NGB,NGF,NKX2-1,NLGN1,NOS1,NTF4,NTRK1,NTRK2,PAFAH1B1,PAK1,PBX3,PEX13,PPP3CB,PRKCA,PSEN1,PSEN2,RELN,SLC1A3,SLC6A4,SNAP25,SOD1,SYNJ1,TH,VLDLR
181	GO: Biological Process	GO:0090493	catecholamine uptake	GeneOntologyBiologicalProcess_GO:0090493_catecholamine uptake	10	DRD1,DRD2,DRD3,DRD4,SLC6A3,SNCA
182	GO: Biological Process	GO:0010038	response to metal ion	GeneOntologyBiologicalProcess_GO:0010038_response to metal ion	10	ABAT,APP,BCL2,BRAF,CASP3,CASR,CTNNB1,DRD2,GRIN1,GRIN2A,ITPR3,KCNMA1,LRRK2,MECP2,NOS1,NPC1,SLC18A2,SLC6A3,SNCA,SOD1,TH,TPH2
183	GO: Biological Process	GO:0048519	negative regulation of biological process	GeneOntologyBiologicalProcess_GO:0048519_negative regulation of biological process	10	ABAT,ACE,ACE2,ADORA1,ADORA2A,ADRB2,AGT,AGTR2,APOE,APP,AR,BCL2,BDNF,BRAF,CASP3,CDK5,CDK5R1,CHRNA7,COMT,CTNNB1,DACH1,DLG3,DLG4,DRD1,DRD2,DRD3,DRD4,DRD5,DYRK1A,FMR1,GNAS,GRIA1,GRIK1,GRIK2,GRIN1,GRIN2A,GRM7,IGF1,IL1RAPL1,ITPR3,KCNAB1,KCNMA1,KRAS,LRRK2,MAPT,MECP2,NGB,NGF,NKX2-1,NLGN1,NOS1,NPC1,NTF4,NTRK1,NTRK2,PAFAH1B1,PAK1,PPP3CB,PRKCA,PSEN1,PSEN2,SLC18A2,SLC6A3,SLC6A4,SNCA,SOD1,TSC2,VLDLR,WWC1
185	GO: Biological Process	GO:0051934	catecholamine uptake involved in synaptic transmission	GeneOntologyBiologicalProcess_GO:0051934_catecholamine uptake involved in synaptic transmission	10	DRD1,DRD2,DRD3,DRD4,SLC6A3,SNCA
186	GO: Biological Process	GO:0034766	negative regulation of ion transmembrane transport	GeneOntologyBiologicalProcess_GO:0034766_negative regulation of ion transmembrane transport	10	ACE,AGT,DRD2,DRD3,DRD4,FMR1,KCNAB1
187	GO: Biological Process	GO:0072521	purine-containing compound metabolic process	GeneOntologyBiologicalProcess_GO:0072521_purine-containing compound metabolic process	10	ADORA2A,ADRB2,APOE,ATP2B2,BDNF,DLG3,DLG4,DRD1,DRD2,DRD3,DRD4,DRD5,GNAS,GRM7,IGF1,LRRK2,MECP2,NOS1,PRKCA,SNCA
189	GO: Biological Process	GO:0099565	chemical synaptic transmission, postsynaptic	GeneOntologyBiologicalProcess_GO:0099565_chemical synaptic transmission, postsynaptic	10	ABAT,ADORA1,ADORA2A,ADRB2,BDNF,CDK5,CHRNA4,CHRNA7,DLG4,DRD2,DRD4,GABRA2,GRIK1,GRIK2,GRIN1,GRIN2A,GRIN2B,GRIN2D,LRRK2,MECP2,NLGN1,RELN,SNCA
190	GO: Biological Process	GO:0015031	protein transport	GeneOntologyBiologicalProcess_GO:0015031_protein transport	10	ABAT,ADORA1,ADORA2A,AGT,AGTR2,APOE,CASR,CDK5,CDK5R1,CTNNB1,DRD1,DRD2,DRD3,DRD4,GNAS,GRIK2,IGF1,ITPR3,LRRK2,NLGN1,NOS1,PACS1,PAFAH1B1,PEX13,PPP3CB,PRKCA,PSEN1,PSEN2,SLC18A2,SNAP25,TSC2,VLDLR
191	GO: Biological Process	GO:0006952	defense response	GeneOntologyBiologicalProcess_GO:0006952_defense response	10	ACE,ACE2,ADORA1,ADORA2A,ADRB2,AGT,AGTR2,APOE,APP,BCL2,BDNF,BMX,CHRNA7,DRD1,DRD2,DRD4,GRIK2,GRIN2B,GRM7,KALRN,KRAS,MECP2,NTRK2,PACS1,PAK1,PEX13,PRKCA,SCN1A,SLC1A3,SNCA
192	GO: Biological Process	GO:0007565	female pregnancy	GeneOntologyBiologicalProcess_GO:0007565_female pregnancy	10	ADRB2,AGT,AR,BCL2,COMT,GNAS,IGF1,MAPT,NOS1,SOD1
193	GO: Biological Process	GO:0048639	positive regulation of developmental growth	GeneOntologyBiologicalProcess_GO:0048639_positive regulation of developmental growth	10	ADRB2,AGT,APOE,BCL2,BDNF,DRD2,IGF1,MAPT,NGF,PAFAH1B1,SLC6A3
194	GO: Biological Process	GO:0051668	localization within membrane	GeneOntologyBiologicalProcess_GO:0051668_localization within membrane	10	APOE,CDK5,DLG3,DLG4,GRIA1,GRIK2,GRIN2B,NLGN1,PAK1,RELN,TSC2
195	GO: Biological Process	GO:0008283	cell proliferation	GeneOntologyBiologicalProcess_GO:0008283_cell proliferation	10	ACE,ACE2,ADORA1,ADORA2A,ADRB2,AGT,AGTR2,APOE,AR,BCL2,BDNF,BMX,BRAF,CASP3,CASR,CDK5,CDK5R1,CHRNA7,COMT,CTNNB1,DACH1,DBH,DLG3,DRD2,DRD3,GNAS,IGF1,KRAS,LRRK2,MECP2,NGF,NOS1,NTRK1,NTRK2,PAFAH1B1,PAK1,PPP3CB,PRKCA,PSEN1,SLC6A4,TSC2,TYR
196	GO: Biological Process	GO:2000026	regulation of multicellular organismal development	GeneOntologyBiologicalProcess_GO:2000026_regulation of multicellular organismal development	10	ACE,ADRB2,AGT,AGTR2,APOE,APP,AR,BCL2,BDNF,BRAF,CDK5,CDK5R1,CHRNA7,CTNNB1,DRD2,DRD3,FMR1,GNAS,GRIN1,IGF1,IL1RAPL1,KALRN,LRRK2,MAPT,MECP2,NGF,NKX2-1,NLGN1,NOS1,NTF4,NTRK1,NTRK2,PAFAH1B1,PRKCA,PSEN1,RELN,SLC6A4,SNAP25,SOD1,SYNJ1,VLDLR
197	GO: Biological Process	GO:0099531	presynaptic process involved in chemical synaptic transmission	GeneOntologyBiologicalProcess_GO:0099531_presynaptic process involved in chemical synaptic transmission	10	ADORA2A,BRAF,CDK5,CHAT,DRD1,DRD2,DRD3,DRD4,FMR1,GAD1,LRRK2,NGF,NLGN1,NTRK2,PAK1,PSEN1,SLC18A2,SLC6A3,SNAP25,SNCA,SYN1,SYNJ1
198	GO: Biological Process	GO:0035556	intracellular signal transduction	GeneOntologyBiologicalProcess_GO:0035556_intracellular signal transduction	10	ACE2,ADORA1,ADRB2,AGT,AGTR2,APOE,AR,BCL2,BMX,BRAF,CASP3,CASR,CDK5,CDK5R1,CHRNA7,CTNNB1,DLG4,DRD1,DRD2,DRD3,DRD4,DYRK1A,GNAS,GRIK2,GRIN1,GRIN2A,GRIN2B,GRIN2D,IGF1,ITPR3,KALRN,KRAS,LRRK2,MAPT,NGF,NLGN1,NOS1,NTRK1,NTRK2,PAFAH1B1,PAK1,PPP3CB,PRKCA,PSEN1,PSEN2,RELN,SOD1,SYNJ1,TSC2,WWC1
199	GO: Biological Process	GO:0015850	organic hydroxy compound transport	GeneOntologyBiologicalProcess_GO:0015850_organic hydroxy compound transport	10	ABAT,ADORA2A,AGT,AGTR2,APOE,CHRNA4,CHRNA7,DRD1,DRD2,DRD3,DRD4,MECP2,NOS1,NPC1,PSEN1,SLC18A2,SLC6A3,SLC6A4,SNCA
200	GO: Biological Process	GO:0051961	negative regulation of nervous system development	GeneOntologyBiologicalProcess_GO:0051961_negative regulation of nervous system development	10	APOE,APP,BDNF,CDK5,CDK5R1,CTNNB1,DRD3,MECP2,NLGN1,PAFAH1B1,PSEN1,SLC6A4
201	GO: Biological Process	GO:0042423	catecholamine biosynthetic process	GeneOntologyBiologicalProcess_GO:0042423_catecholamine biosynthetic process	10	AGTR2,DBH,HDC,SLC6A3,SNCA,TH
202	GO: Biological Process	GO:0042391	regulation of membrane potential	GeneOntologyBiologicalProcess_GO:0042391_regulation of membrane potential	10	ABAT,ADORA1,ADORA2A,ADRB2,AGT,BCL2,BDNF,CDK5,CHRNA4,CHRNA7,DLG4,DRD1,DRD4,FMR1,GRIA1,GRIK1,GRIK2,GRIN1,GRIN2A,GRIN2B,GRIN2D,KCND2,KCNMA1,LRRK2,MECP2,NLGN1,PSEN1,RELN,SCN1A,SNCA,SOD1
203	GO: Biological Process	GO:0051641	cellular localization	GeneOntologyBiologicalProcess_GO:0051641_cellular localization	10	ABAT,ADORA1,ADORA2A,ADRB2,AGT,AGTR2,APOE,APP,AR,BCL2,BRAF,CASR,CDK5,CDK5R1,CHAT,CHRNA4,CHRNA7,CTNNB1,DLG3,DLG4,DRD1,DRD2,DRD3,DRD4,FMR1,GAD1,GNAS,GRIA1,GRIK2,GRIN2B,GRM7,IGF1,IL1RAPL1,ITPR3,KALRN,LRRK2,MAPT,NGF,NLGN1,NOS1,NPC1,NTRK2,PACS1,PAFAH1B1,PAK1,PEX13,PPP3CB,PRKCA,PSEN1,RELN,SLC18A2,SLC1A3,SLC6A3,SLC6A4,SNAP25,SNCA,SOD1,SYN1,SYNJ1,TH,TSC2,WWC1
204	GO: Biological Process	GO:0023061	signal release	GeneOntologyBiologicalProcess_GO:0023061_signal release	10	ABAT,ADORA1,ADORA2A,AGT,AGTR2,BRAF,CASR,CDK5,CHAT,DRD2,DRD4,FMR1,GAD1,GNAS,ITPR3,LRRK2,NGF,NLGN1,NOS1,NTRK2,PAK1,PPP3CB,PRKCA,PSEN1,SLC18A2,SNAP25,SNCA,SYN1,SYNJ1
205	GO: Biological Process	GO:0030431	sleep	GeneOntologyBiologicalProcess_GO:0030431_sleep	10	ADORA1,ADORA2A,DRD1,DRD2,DRD3,GRIN2A,SNAP25
206	GO: Biological Process	GO:0007588	excretion	GeneOntologyBiologicalProcess_GO:0007588_excretion	10	ADORA1,ADORA2A,AGT,AGTR2,COMT,DRD2,DRD3,GNAS,KCNMA1
207	GO: Biological Process	GO:0008285	negative regulation of cell proliferation	GeneOntologyBiologicalProcess_GO:0008285_negative regulation of cell proliferation	10	ACE2,ADORA1,ADORA2A,AGT,AGTR2,APOE,AR,BCL2,BDNF,CASP3,COMT,CTNNB1,DACH1,DLG3,DRD2,IGF1,NOS1,NTRK1,PAK1,PRKCA,SLC6A4,TSC2
209	GO: Biological Process	GO:0022008	neurogenesis	GeneOntologyBiologicalProcess_GO:0022008_neurogenesis	10	ACE,ADORA2A,AGT,APOE,APP,ATP2B2,BCL2,BDNF,BRAF,CASP3,CDK5,CDK5R1,CHAT,CTNNB1,DLG4,DRD1,DRD2,DRD3,FMR1,GRIN1,GRIN2A,IGF1,IL1RAPL1,KALRN,KCNMA1,KRAS,LRRK2,MAPT,MECP2,NGB,NGF,NKX2-1,NLGN1,NOS1,NTF4,NTRK1,NTRK2,PAFAH1B1,PAK1,PBX3,PEX13,PPP3CB,PRKCA,PSEN1,RELN,SLC1A3,SLC6A4,SNAP25,SOD1,SYNJ1,TH,VLDLR
210	GO: Biological Process	GO:0043086	negative regulation of catalytic activity	GeneOntologyBiologicalProcess_GO:0043086_negative regulation of catalytic activity	10	ADORA2A,AGT,APOE,APP,CASP3,DLG3,DRD1,DRD2,DRD3,DRD4,DRD5,GRM7,IGF1,LRRK2,NGF,NOS1,PRKCA,PSEN1,PSEN2,SNCA,TSC2
211	GO: Biological Process	GO:0071705	nitrogen compound transport	GeneOntologyBiologicalProcess_GO:0071705_nitrogen compound transport	10	ABAT,ACE2,ADORA1,ADORA2A,AGT,AGTR2,BDNF,CASR,CHRNA4,CHRNA7,DRD1,DRD2,DRD3,DRD4,FMR1,GNAS,GRIK1,GRIN2B,GRM7,ITPR3,MECP2,NOS1,NTRK2,PAK1,PPP3CB,PRKCA,PSEN1,SLC18A2,SLC1A3,SLC6A3,SLC6A4,SNAP25,SNCA,TH
212	GO: Biological Process	GO:0017156	calcium ion regulated exocytosis	GeneOntologyBiologicalProcess_GO:0017156_calcium ion regulated exocytosis	10	BRAF,CDK5,FMR1,LRRK2,NLGN1,PPP3CB,PSEN1,SNAP25,SYN1,SYNJ1
213	GO: Biological Process	GO:0006584	catecholamine metabolic process	GeneOntologyBiologicalProcess_GO:0006584_catecholamine metabolic process	10	ABAT,AGTR2,COMT,DBH,DRD1,DRD2,DRD3,DRD4,GRIN2A,HDC,MAOA,SLC6A3,SNCA,TH
214	GO: Biological Process	GO:0048169	regulation of long-term neuronal synaptic plasticity	GeneOntologyBiologicalProcess_GO:0048169_regulation of long-term neuronal synaptic plasticity	10	AGT,BDNF,DLG4,DRD1,DRD2,DRD5,GRIK1,GRIK2,GRIN1,GRIN2A,GRIN2B,KRAS,SNCA
215	GO: Biological Process	GO:0007409	axonogenesis	GeneOntologyBiologicalProcess_GO:0007409_axonogenesis	10	APOE,APP,BCL2,BDNF,BRAF,CDK5,CDK5R1,DRD2,GRIN1,KALRN,KRAS,MAPT,NGF,NKX2-1,NTRK1,NTRK2,PAFAH1B1,PAK1,PPP3CB,PRKCA,PSEN1,RELN
216	GO: Biological Process	GO:0044106	cellular amine metabolic process	GeneOntologyBiologicalProcess_GO:0044106_cellular amine metabolic process	10	ABAT,CHAT,COMT,DBH,DRD1,DRD4,HDC,MAOA,MECP2,PAFAH1B1,SLC6A3,SNCA,TPH2
217	GO: Biological Process	GO:0034220	ion transmembrane transport	GeneOntologyBiologicalProcess_GO:0034220_ion transmembrane transport	10	ACE,AGT,ATP2B2,CASR,CHRNA4,CHRNA7,CTNNB1,DLG3,DLG4,DRD1,DRD2,DRD3,DRD4,FMR1,GABRA2,GRIA1,GRIA3,GRIK1,GRIK2,GRIN1,GRIN2A,GRIN2B,GRIN2D,GRM7,IL1RAPL1,ITPR3,KCNAB1,KCND2,KCNMA1,NGF,NLGN1,NOS1,PSEN1,RELN,SCN1A,SLC1A3,SLC6A3,SNAP25,SNCA
218	GO: Biological Process	GO:0048511	rhythmic process	GeneOntologyBiologicalProcess_GO:0048511_rhythmic process	10	ADORA1,ADORA2A,ADRB2,AGT,BCL2,CDK5,CDK5R1,CHAT,CHRNA7,DRD1,DRD2,DRD3,DRD4,DYRK1A,GRIN1,GRIN2A,GRIN2B,KCND2,KCNMA1,NKX2-1,NLGN1,NTRK1,NTRK2,SLC6A4,SOD1,TH,TPH2
219	GO: Biological Process	GO:0001666	response to hypoxia	GeneOntologyBiologicalProcess_GO:0001666_response to hypoxia	10	ABAT,ADORA1,ADRB2,BCL2,CASP3,CHAT,CHRNA4,CHRNA7,DRD1,DRD2,IGF1,KCND2,KCNMA1,MECP2,NOS1,PAK1,PSEN2,SLC6A4,TH,TSC2,VLDLR
220	GO: Biological Process	GO:0019226	transmission of nerve impulse	GeneOntologyBiologicalProcess_GO:0019226_transmission of nerve impulse	10	AGT,CHRNA7,DRD1,DRD5,FMR1,GRIA1,GRIK2,GRM7,KCND2,KCNMA1,PAFAH1B1,SCN1A,SOD1
221	GO: Biological Process	GO:0051932	synaptic transmission, GABAergic	GeneOntologyBiologicalProcess_GO:0051932_synaptic transmission, GABAergic	10	ADORA1,ADORA2A,BDNF,DRD2,GRIK1,KRAS,NLGN1,PAK1
222	GO: Biological Process	GO:0003008	system process	GeneOntologyBiologicalProcess_GO:0003008_system process	10	ABAT,ACE,ACE2,ADORA1,ADORA2A,ADRB2,AGT,AGTR2,APOE,APP,AR,ATP2B2,BCL2,BDNF,BRAF,CASP3,CASR,CDK5,CHAT,CHRNA4,CHRNA7,COMT,DBH,DLG4,DRD1,DRD2,DRD3,DRD4,DRD5,FMR1,GNAS,GRIA1,GRIK2,GRIN1,GRIN2A,GRIN2B,GRIN2D,GRM7,IGF1,ITPR3,KALRN,KCNAB1,KCND2,KCNMA1,KRAS,MECP2,NGB,NGF,NKX2-1,NLGN1,NOS1,NTF4,NTRK1,NTRK2,PAFAH1B1,PAK1,PBX3,PPP3CB,PRKCA,PSEN1,PSEN2,RELN,SCN1A,SLC1A3,SLC6A3,SLC6A4,SNAP25,SOD1,SYNJ1,TH,TYR,…
223	GO: Biological Process	GO:0070588	calcium ion transmembrane transport	GeneOntologyBiologicalProcess_GO:0070588_calcium ion transmembrane transport	10	ATP2B2,DRD1,DRD2,DRD4,FMR1,GRIN1,GRIN2A,GRM7,IL1RAPL1,ITPR3,NGF,NOS1,PSEN1,SNCA
224	GO: Biological Process	GO:0072511	divalent inorganic cation transport	GeneOntologyBiologicalProcess_GO:0072511_divalent inorganic cation transport	10	ACE,ADORA2A,ADRB2,AGT,ATP2B2,BCL2,CASR,CDK5,CHRNA4,CHRNA7,CTNNB1,DRD1,DRD2,DRD4,FMR1,GRIN1,GRIN2A,GRIN2B,GRM7,IGF1,IL1RAPL1,ITPR3,NGF,NOS1,PSEN1,PSEN2,SNCA
225	GO: Biological Process	GO:0051239	regulation of multicellular organismal process	GeneOntologyBiologicalProcess_GO:0051239_regulation of multicellular organismal process	10	ABAT,ACE,ACE2,ADORA1,ADORA2A,ADRB2,AGT,AGTR2,APOE,APP,AR,ATP2B2,BCL2,BDNF,BRAF,CASR,CDK5,CDK5R1,CHRNA7,COMT,CTNNB1,DBH,DRD1,DRD2,DRD3,DRD4,FMR1,GNAS,GRIN1,GRIN2A,GRIN2D,IGF1,IL1RAPL1,ITPR3,KALRN,KCND2,KCNMA1,LRRK2,MAPT,MECP2,NGF,NKX2-1,NLGN1,NOS1,NTF4,NTRK1,NTRK2,PAFAH1B1,PBX3,PRKCA,PSEN1,PSEN2,RELN,SLC6A3,SLC6A4,SNAP25,SOD1,SYNJ1,TH,VLDLR,WWC1
226	GO: Biological Process	GO:0051924	regulation of calcium ion transport	GeneOntologyBiologicalProcess_GO:0051924_regulation of calcium ion transport	10	ACE,ADORA2A,ADRB2,AGT,ATP2B2,BCL2,CASR,CTNNB1,DRD1,DRD2,DRD4,FMR1,IGF1,NGF,NOS1,SNCA
227	GO: Biological Process	GO:0071868	cellular response to monoamine stimulus	GeneOntologyBiologicalProcess_GO:0071868_cellular response to monoamine stimulus	10	APP,DRD1,DRD5,GNAS,LRRK2,NOS1,SNCA
228	GO: Biological Process	GO:0018209	peptidyl-serine modification	GeneOntologyBiologicalProcess_GO:0018209_peptidyl-serine modification	10	AGT,BCL2,BDNF,BRAF,CDK5,CDK5R1,DYRK1A,LRRK2,NOS1,NTRK2,PAK1,PRKCA,SNCA
229	GO: Biological Process	GO:0045859	regulation of protein kinase activity	GeneOntologyBiologicalProcess_GO:0045859_regulation of protein kinase activity	10	ACE,ADORA1,ADORA2A,ADRB2,AGT,APOE,APP,BRAF,CASP3,CDK5,CDK5R1,CHRNA7,DRD1,DRD2,DRD4,DRD5,IGF1,KRAS,LRRK2,NGF,NTRK1,PAK1,PRKCA,PSEN1,PSEN2,RELN,SNCA,SOD1,TSC2,VLDLR
230	GO: Biological Process	GO:0044706	multi-multicellular organism process	GeneOntologyBiologicalProcess_GO:0044706_multi-multicellular organism process	10	ADRB2,AGT,AR,BCL2,COMT,GNAS,IGF1,MAPT,NOS1,SLC6A4,SOD1
231	GO: Biological Process	GO:1901699	cellular response to nitrogen compound	GeneOntologyBiologicalProcess_GO:1901699_cellular response to nitrogen compound	10	AGT,AGTR2,APP,CDK5R1,CTNNB1,DRD1,DRD5,FMR1,GNAS,GRIN2A,IGF1,ITPR3,LRRK2,NOS1,NTRK1,NTRK2,PAK1,PRKCA,SLC18A2,SLC6A4,SNCA,SOD1,TH,TSC2,VLDLR
232	GO: Biological Process	GO:0032268	regulation of cellular protein metabolic process	GeneOntologyBiologicalProcess_GO:0032268_regulation of cellular protein metabolic process	10	ACE,ACE2,ADORA1,ADORA2A,ADRB2,AGT,AGTR2,APOE,APP,AR,BCL2,BDNF,BRAF,CASP3,CDK5,CDK5R1,CHRNA7,CTNNB1,DLG3,DRD1,DRD2,DRD4,DRD5,DYRK1A,FMR1,GNAS,GRIK2,GRIN2B,IGF1,KRAS,LRRK2,MECP2,NGF,NOS1,NTRK1,NTRK2,PAFAH1B1,PAK1,PRKCA,PSEN1,PSEN2,RELN,SNCA,SOD1,TSC2,VLDLR,WWC1
233	GO: Biological Process	GO:0010769	regulation of cell morphogenesis involved in differentiation	GeneOntologyBiologicalProcess_GO:0010769_regulation of cell morphogenesis involved in differentiation	10	APOE,BDNF,BRAF,CDK5,CDK5R1,CTNNB1,GRIN1,IL1RAPL1,KALRN,LRRK2,MAPT,NGF,NKX2-1,NLGN1,NTRK2,PAFAH1B1,PSEN1,RELN
234	GO: Biological Process	GO:0042749	regulation of circadian sleep/wake cycle	GeneOntologyBiologicalProcess_GO:0042749_regulation of circadian sleep/wake cycle	10	ADORA1,ADORA2A,DRD1,DRD2,DRD3,NLGN1
235	GO: Biological Process	GO:0097164	ammonium ion metabolic process	GeneOntologyBiologicalProcess_GO:0097164_ammonium ion metabolic process	10	ABAT,AGTR2,ATP2B2,CHAT,COMT,DBH,DRD1,DRD2,DRD3,DRD4,GRIN2A,HDC,MAOA,MECP2,PAFAH1B1,SLC6A3,SNCA,TH,TPH2
236	GO: Biological Process	GO:0016358	dendrite development	GeneOntologyBiologicalProcess_GO:0016358_dendrite development	10	APOE,APP,BDNF,CDK5,CDK5R1,CHAT,DLG4,FMR1,GRIN1,IL1RAPL1,KALRN,LRRK2,MECP2,NLGN1,NTRK2,PAFAH1B1,PAK1,PSEN1,RELN,VLDLR
237	GO: Biological Process	GO:0022603	regulation of anatomical structure morphogenesis	GeneOntologyBiologicalProcess_GO:0022603_regulation of anatomical structure morphogenesis	10	ADRB2,AGT,AGTR2,APOE,AR,BCL2,BDNF,BRAF,CDK5,CDK5R1,CHRNA7,CTNNB1,GRIN1,IL1RAPL1,KALRN,LRRK2,MAPT,NGF,NKX2-1,NLGN1,NTRK1,NTRK2,PAFAH1B1,PRKCA,PSEN1,RELN
238	GO: Biological Process	GO:0019932	second-messenger-mediated signaling	GeneOntologyBiologicalProcess_GO:0019932_second-messenger-mediated signaling	10	AGT,AGTR2,APOE,DRD1,DRD4,GNAS,IGF1,ITPR3,LRRK2,NOS1,NTRK2,PPP3CB
239	GO: Biological Process	GO:0051350	negative regulation of lyase activity	GeneOntologyBiologicalProcess_GO:0051350_negative regulation of lyase activity	10	DRD2,DRD3,DRD4,GRM7,PRKCA
240	GO: Biological Process	GO:0007623	circadian rhythm	GeneOntologyBiologicalProcess_GO:0007623_circadian rhythm	10	ADORA1,ADORA2A,DRD1,DRD2,DRD3,DRD4,DYRK1A,KCND2,KCNMA1,NKX2-1,NLGN1,NTRK1,NTRK2,SLC6A4,TH,TPH2
241	GO: Biological Process	GO:0071900	regulation of protein serine/threonine kinase activity	GeneOntologyBiologicalProcess_GO:0071900_regulation of protein serine/threonine kinase activity	10	ADORA1,AGT,APOE,BRAF,CASP3,CDK5R1,CHRNA7,DRD4,IGF1,KRAS,LRRK2,NGF,NTRK1,PAK1,PRKCA,PSEN1,SNCA,SOD1,TSC2
242	GO: Biological Process	GO:0080134	regulation of response to stress	GeneOntologyBiologicalProcess_GO:0080134_regulation of response to stress	10	ABAT,ACE,ACE2,ADORA1,ADORA2A,ADRB2,AGT,APOE,BRAF,CASP3,CDK5,CDK5R1,CHRNA7,DRD2,DYRK1A,FMR1,GRIK2,KRAS,LRRK2,NGB,NPC1,PACS1,PAFAH1B1,PAK1,PEX13,PRKCA,SCN1A,SLC1A3,SNCA,SOD1,TSC2
243	GO: Biological Process	GO:0030334	regulation of cell migration	GeneOntologyBiologicalProcess_GO:0030334_regulation of cell migration	10	ACE,ADORA1,AGT,AGTR2,APOE,BCL2,BRAF,CDK5,DACH1,DRD1,DRD2,DRD5,IGF1,NKX2-1,PAK1,PRKCA,RELN
244	GO: Biological Process	GO:0007632	visual behavior	GeneOntologyBiologicalProcess_GO:0007632_visual behavior	10	APP,BRAF,CDK5,DBH,DRD1,DRD2,DRD3,DRD5,GRIN1,GRIN2A,KRAS,MECP2
245	GO: Biological Process	GO:0032228	regulation of synaptic transmission, GABAergic	GeneOntologyBiologicalProcess_GO:0032228_regulation of synaptic transmission, GABAergic	10	ADORA1,ADORA2A,BDNF,DRD2,GRIK1,KRAS,NLGN1
246	GO: Biological Process	GO:0022604	regulation of cell morphogenesis	GeneOntologyBiologicalProcess_GO:0022604_regulation of cell morphogenesis	10	APOE,BDNF,BRAF,CDK5,CDK5R1,CTNNB1,GRIN1,IL1RAPL1,KALRN,LRRK2,MAPT,NGF,NKX2-1,NLGN1,NTRK2,PAFAH1B1,PSEN1,RELN
247	GO: Biological Process	GO:0042311	vasodilation	GeneOntologyBiologicalProcess_GO:0042311_vasodilation	10	ACE,ACE2,ADORA1,ADORA2A,ADRB2,AGT,AGTR2,APOE,CASR,DRD1,KCNMA1,NOS1,SOD1
248	GO: Biological Process	GO:0044087	regulation of cellular component biogenesis	GeneOntologyBiologicalProcess_GO:0044087_regulation of cellular component biogenesis	10	ACE,ACE2,AGT,APOE,BDNF,BRAF,CTNNB1,FMR1,GRIN1,LRRK2,MAPT,MECP2,NLGN1,NTRK1,NTRK2,PAK1,PRKCA,PSEN2,SNCA
249	GO: Biological Process	GO:0008306	associative learning	GeneOntologyBiologicalProcess_GO:0008306_associative learning	10	ADRB2,APP,BRAF,CDK5,CHRNA7,DBH,DRD1,DRD2,DRD3,DRD4,DRD5,GRIN1,GRIN2A,GRIN2B,GRM7,KRAS,MECP2,RELN,SNAP25
250	GO: Biological Process	GO:0008104	protein localization	GeneOntologyBiologicalProcess_GO:0008104_protein localization	10	ABAT,ADORA1,ADORA2A,AGT,AGTR2,APOE,AR,BCL2,BRAF,CASR,CDK5,CDK5R1,CTNNB1,DLG3,DLG4,DRD1,DRD2,DRD3,DRD4,GNAS,GRIK2,GRIN2A,GRIN2B,IGF1,ITPR3,KALRN,LRRK2,MECP2,NLGN1,NOS1,NPC1,PACS1,PAFAH1B1,PAK1,PEX13,PPP3CB,PRKCA,PSEN1,PSEN2,RELN,SLC18A2,SNAP25,TSC2,VLDLR
251	GO: Biological Process	GO:0070997	neuron death	GeneOntologyBiologicalProcess_GO:0070997_neuron death	10	ADORA2A,AGT,AGTR2,APOE,APP,BCL2,BDNF,BRAF,CASP3,CDK5,CDK5R1,CTNNB1,GRIK2,GRIN1,GRM7,IGF1,KCNMA1,KRAS,LRRK2,MECP2,NGF,NOS1,NTF4,NTRK1,NTRK2,PSEN1,SNCA,SOD1
252	GO: Biological Process	GO:0006464	cellular protein modification process	GeneOntologyBiologicalProcess_GO:0006464_cellular protein modification process	10	ACE,ACE2,ADORA1,ADORA2A,ADRB2,AGT,AGTR2,ANKK1,APOE,APP,AR,BCL2,BDNF,BMX,BRAF,CASP3,CASR,CDK5,CDK5R1,CHRNA7,CTNNB1,DLG3,DLG4,DRD1,DRD2,DRD4,DRD5,DYRK1A,FMR1,GAD1,GNAS,GRIK2,GRIN1,GRIN2A,GRIN2B,GRIN2D,IGF1,KALRN,KRAS,LRRK2,MECP2,NGF,NOS1,NPC1,NTRK1,NTRK2,PAFAH1B1,PAK1,PPP3CB,PRKCA,PSEN1,PSEN2,RELN,SNCA,SOD1,TSC2,VLDLR,WWC1
253	GO: Biological Process	GO:0000003	reproduction	GeneOntologyBiologicalProcess_GO:0000003_reproduction	10	ABAT,ACE,ADRB2,AGT,APP,AR,BCL2,CHAT,CHRNA7,COMT,CTNNB1,DACH1,DBH,DRD1,DRD4,DRD5,GNAS,GRIN1,IGF1,MAPT,NKX2-1,NOS1,NTRK1,PAFAH1B1,SLC6A4,SOD1,TH
255	GO: Biological Process	GO:0051349	positive regulation of lyase activity	GeneOntologyBiologicalProcess_GO:0051349_positive regulation of lyase activity	10	ADORA2A,ADRB2,DRD1,DRD5,GNAS,NOS1,PRKCA
256	GO: Biological Process	GO:0019228	neuronal action potential	GeneOntologyBiologicalProcess_GO:0019228_neuronal action potential	10	CHRNA7,DRD1,FMR1,GRIA1,GRIK2,KCND2,KCNMA1,SCN1A
257	GO: Biological Process	GO:0051926	negative regulation of calcium ion transport	GeneOntologyBiologicalProcess_GO:0051926_negative regulation of calcium ion transport	10	ACE,BCL2,DRD2,DRD4,FMR1,NOS1
258	GO: Biological Process	GO:0060429	epithelium development	GeneOntologyBiologicalProcess_GO:0060429_epithelium development	10	AGT,AGTR2,AR,ATP2B2,BCL2,BDNF,CASP3,CASR,CTNNB1,DLG3,GNAS,IGF1,KCNMA1,KRAS,NKX2-1,NTF4,NTRK1,PAFAH1B1,PAK1,PSEN1,PSEN2,SOD1,TSC2
259	GO: Biological Process	GO:0043269	regulation of ion transport	GeneOntologyBiologicalProcess_GO:0043269_regulation of ion transport	10	ABAT,ACE,ADORA1,ADORA2A,ADRB2,AGT,AGTR2,APOE,ATP2B2,BCL2,CASR,CHRNA4,CTNNB1,DLG4,DRD1,DRD2,DRD3,DRD4,FMR1,GNAS,GRIK1,GRIN1,GRIN2A,GRIN2B,GRIN2D,GRM7,IGF1,KCNAB1,KCND2,KCNMA1,NGF,NLGN1,NOS1,RELN,SCN1A,SNCA
260	GO: Biological Process	GO:0045927	positive regulation of growth	GeneOntologyBiologicalProcess_GO:0045927_positive regulation of growth	10	ADRB2,AGT,APOE,BCL2,BDNF,DRD2,IGF1,MAPT,NGF,PAFAH1B1,SLC6A3
261	GO: Biological Process	GO:0010035	response to inorganic substance	GeneOntologyBiologicalProcess_GO:0010035_response to inorganic substance	10	ABAT,APP,BCL2,BRAF,CASP3,CASR,CTNNB1,DRD2,FMR1,GRIN1,GRIN2A,ITPR3,KCNMA1,LRRK2,MECP2,NGB,NOS1,NPC1,NTRK1,SLC18A2,SLC1A3,SLC6A3,SNCA,SOD1,TH,TPH2
262	GO: Biological Process	GO:1900271	regulation of long-term synaptic potentiation	GeneOntologyBiologicalProcess_GO:1900271_regulation of long-term synaptic potentiation	10	DRD1,DRD2,GRIN2A,GRIN2B,NOS1,PAK1,RELN
263	GO: Biological Process	GO:0048699	generation of neurons	GeneOntologyBiologicalProcess_GO:0048699_generation of neurons	10	ACE,ADORA2A,APOE,APP,ATP2B2,BCL2,BDNF,BRAF,CASP3,CDK5,CDK5R1,CHAT,CTNNB1,DLG4,DRD1,DRD2,DRD3,FMR1,GRIN1,IL1RAPL1,KALRN,KCNMA1,KRAS,LRRK2,MAPT,MECP2,NGB,NGF,NKX2-1,NLGN1,NOS1,NTF4,NTRK1,NTRK2,PAFAH1B1,PAK1,PBX3,PEX13,PPP3CB,PRKCA,PSEN1,RELN,SLC1A3,SLC6A4,SNAP25,SOD1,SYNJ1,TH,VLDLR
264	GO: Biological Process	GO:0010817	regulation of hormone levels	GeneOntologyBiologicalProcess_GO:0010817_regulation of hormone levels	10	ABAT,ACE,ACE2,ADH1C,ADORA1,AGT,AGTR2,CASR,COMT,DRD2,GNAS,IGF1,ITPR3,KCNMA1,NGF,NOS1,PPP3CB,PRKCA,RELN,SLC18A2,SNAP25
265	GO: Biological Process	GO:0048011	neurotrophin TRK receptor signaling pathway	GeneOntologyBiologicalProcess_GO:0048011_neurotrophin TRK receptor signaling pathway	10	AGT,AGTR2,CASP3,NGF,NTRK1
266	GO: Biological Process	GO:0048265	response to pain	GeneOntologyBiologicalProcess_GO:0048265_response to pain	10	COMT,DBH,GRIK1,GRIN2B,NTRK1,RELN
267	GO: Biological Process	GO:0050432	catecholamine secretion	GeneOntologyBiologicalProcess_GO:0050432_catecholamine secretion	10	ABAT,ADORA2A,AGT,AGTR2,CHRNA4,CHRNA7,DRD2,DRD3,MECP2,SNCA
268	GO: Biological Process	GO:0002790	peptide secretion	GeneOntologyBiologicalProcess_GO:0002790_peptide secretion	10	ABAT,ADORA1,CASR,DRD2,GNAS,ITPR3,NOS1,PPP3CB,PRKCA,SLC18A2,SNAP25
269	GO: Biological Process	GO:0046058	cAMP metabolic process	GeneOntologyBiologicalProcess_GO:0046058_cAMP metabolic process	10	ADORA2A,ADRB2,DRD1,DRD2,DRD3,DRD4,DRD5,GNAS,GRM7,PRKCA
271	GO: Biological Process	GO:0051128	regulation of cellular component organization	GeneOntologyBiologicalProcess_GO:0051128_regulation of cellular component organization	10	ACE,ACE2,ADRB2,AGT,AGTR2,APOE,AR,BCL2,BDNF,BRAF,CDK5,CDK5R1,CTNNB1,DLG4,DRD2,DRD3,FMR1,GRIN1,IGF1,IL1RAPL1,KALRN,LRRK2,MAPT,MECP2,NGF,NKX2-1,NLGN1,NOS1,NTRK1,NTRK2,PAFAH1B1,PAK1,PRKCA,PSEN1,PSEN2,RELN,SNAP25,SNCA,SYNJ1,TSC2,VLDLR
272	GO: Biological Process	GO:0044089	positive regulation of cellular component biogenesis	GeneOntologyBiologicalProcess_GO:0044089_positive regulation of cellular component biogenesis	10	ACE2,AGT,APOE,BDNF,BRAF,CTNNB1,FMR1,MAPT,MECP2,NLGN1,NTRK1,NTRK2,PAK1,PRKCA
273	GO: Biological Process	GO:2000021	regulation of ion homeostasis	GeneOntologyBiologicalProcess_GO:2000021_regulation of ion homeostasis	10	ADORA1,ADORA2A,AGT,AGTR2,BCL2,COMT,DRD1,DRD2,DRD3,GNAS,ITPR3,LRRK2,NGF,NOS1,SNCA
275	GO: Biological Process	GO:0080135	regulation of cellular response to stress	GeneOntologyBiologicalProcess_GO:0080135_regulation of cellular response to stress	10	ADRB2,BRAF,CASP3,CDK5,CDK5R1,DYRK1A,FMR1,GRIK2,KRAS,LRRK2,NGB,NPC1,PAFAH1B1,PAK1,SNCA,SOD1,TSC2
276	GO: Biological Process	GO:0099537	trans-synaptic signaling	GeneOntologyBiologicalProcess_GO:0099537_trans-synaptic signaling	10	ABAT,ADORA1,ADORA2A,ADRB2,AGT,APOE,ATP2B2,BDNF,BRAF,CDK5,CHAT,CHRNA4,CHRNA7,CTNNB1,DBH,DLG3,DLG4,DRD1,DRD2,DRD3,DRD4,DRD5,FMR1,GABRA2,GAD1,GRIA1,GRIA3,GRIK1,GRIK2,GRIN1,GRIN2A,GRIN2B,GRIN2D,GRM7,ITPR3,KALRN,KCND2,KCNMA1,KRAS,LRRK2,MAPT,MECP2,NGF,NLGN1,NOS1,NTRK1,NTRK2,PAFAH1B1,PAK1,PPP3CB,PSEN1,PSEN2,RELN,SLC18A2,SLC1A3,SLC6A3,SLC6A4,SNAP25,SNCA,SYN1,SYNJ1,TH
277	GO: Biological Process	GO:0043412	macromolecule modification	GeneOntologyBiologicalProcess_GO:0043412_macromolecule modification	10	ACE,ACE2,ADORA1,ADORA2A,ADRB2,AGT,AGTR2,ANKK1,APOE,APP,AR,BCL2,BDNF,BMX,BRAF,CASP3,CASR,CDK5,CDK5R1,CHRNA7,CTNNB1,DLG3,DLG4,DRD1,DRD2,DRD4,DRD5,DYRK1A,FMR1,GAD1,GNAS,GRIK2,GRIN1,GRIN2A,GRIN2B,GRIN2D,IGF1,KALRN,KRAS,LRRK2,MECP2,NGF,NOS1,NPC1,NTRK1,NTRK2,PAFAH1B1,PAK1,PPP3CB,PRKCA,PSEN1,PSEN2,RELN,SNCA,SOD1,TSC2,VLDLR,WWC1
278	GO: Biological Process	GO:0030817	regulation of cAMP biosynthetic process	GeneOntologyBiologicalProcess_GO:0030817_regulation of cAMP biosynthetic process	10	ADORA2A,ADRB2,DRD1,DRD2,DRD3,DRD4,DRD5,GNAS,GRM7,PRKCA
280	GO: Biological Process	GO:0000904	cell morphogenesis involved in differentiation	GeneOntologyBiologicalProcess_GO:0000904_cell morphogenesis involved in differentiation	10	APOE,APP,AR,ATP2B2,BCL2,BDNF,BRAF,CASP3,CDK5,CDK5R1,CTNNB1,DLG4,DRD2,GRIN1,IL1RAPL1,KALRN,KRAS,LRRK2,MAPT,NGF,NKX2-1,NLGN1,NTRK1,NTRK2,PAFAH1B1,PAK1,PPP3CB,PRKCA,PSEN1,RELN,SLC1A3,SOD1,VLDLR
281	GO: Biological Process	GO:2000146	negative regulation of cell motility	GeneOntologyBiologicalProcess_GO:2000146_negative regulation of cell motility	10	ADORA1,AGTR2,APOE,BCL2,BRAF,DACH1,DRD1,DRD2,DRD5,NKX2-1
282	GO: Biological Process	GO:0051336	regulation of hydrolase activity	GeneOntologyBiologicalProcess_GO:0051336_regulation of hydrolase activity	10	ADORA2A,ADRB2,AGT,AGTR2,APP,CASP3,CASR,DLG3,DLG4,DRD2,GNAS,GRIN1,GRIN2A,GRIN2B,GRIN2D,IGF1,KALRN,LRRK2,NGF,NOS1,NTRK1,NTRK2,PAFAH1B1,SNCA,SOD1,TSC2
283	GO: Biological Process	GO:0006897	endocytosis	GeneOntologyBiologicalProcess_GO:0006897_endocytosis	10	ADORA1,ADORA2A,ADRB2,APOE,APP,CDK5,CHRNA7,DLG4,DRD2,DRD3,FMR1,GRIA1,LRRK2,NLGN1,NPC1,PAK1,PRKCA,SNCA,SYNJ1,TSC2,VLDLR
284	GO: Biological Process	GO:0060341	regulation of cellular localization	GeneOntologyBiologicalProcess_GO:0060341_regulation of cellular localization	10	ABAT,ADORA1,ADORA2A,AGT,AGTR2,AR,BCL2,BRAF,CASR,CDK5,CDK5R1,CHRNA4,CHRNA7,CTNNB1,DRD1,DRD2,DRD3,DRD4,FMR1,GNAS,GRIN2B,GRM7,IGF1,IL1RAPL1,ITPR3,KALRN,LRRK2,MAPT,NGF,NLGN1,NOS1,NTRK2,PPP3CB,PRKCA,SNAP25,SNCA,SYN1,SYNJ1,WWC1
285	GO: Biological Process	GO:0030804	positive regulation of cyclic nucleotide biosynthetic process	GeneOntologyBiologicalProcess_GO:0030804_positive regulation of cyclic nucleotide biosynthetic process	10	ADORA2A,ADRB2,APOE,DRD1,DRD5,GNAS,NOS1,PRKCA
286	GO: Biological Process	GO:0051174	regulation of phosphorus metabolic process	GeneOntologyBiologicalProcess_GO:0051174_regulation of phosphorus metabolic process	10	ACE,ACE2,ADORA1,ADORA2A,ADRB2,AGT,AGTR2,APOE,APP,AR,BCL2,BDNF,BRAF,CASP3,CDK5,CDK5R1,CHRNA7,CTNNB1,DLG3,DRD1,DRD2,DRD3,DRD4,DRD5,FMR1,GNAS,GRIK2,GRIN2B,GRM7,IGF1,KRAS,LRRK2,NGF,NOS1,NTRK1,NTRK2,PAFAH1B1,PAK1,PRKCA,PSEN1,PSEN2,RELN,SNCA,SOD1,TSC2,VLDLR,WWC1
287	GO: Biological Process	GO:0060134	prepulse inhibition	GeneOntologyBiologicalProcess_GO:0060134_prepulse inhibition	10	ADORA2A,DRD1,DRD2,DRD3,GRIN1,SLC6A3
288	GO: Biological Process	GO:0044093	positive regulation of molecular function	GeneOntologyBiologicalProcess_GO:0044093_positive regulation of molecular function	10	ACE,ADORA1,ADORA2A,ADRB2,AGT,AGTR2,APOE,APP,AR,BCL2,BDNF,BRAF,CASP3,CASR,CDK5,CDK5R1,CHRNA7,CTNNB1,DLG4,DRD1,DRD2,DRD4,DRD5,FMR1,GNAS,GRIN1,GRIN2A,GRIN2B,GRIN2D,IGF1,KALRN,KRAS,LRRK2,NGB,NGF,NOS1,NTRK1,PACS1,PAK1,PRKCA,PSEN1,PSEN2,RELN,SNCA,SOD1,TSC2,VLDLR
289	GO: Biological Process	GO:0006887	exocytosis	GeneOntologyBiologicalProcess_GO:0006887_exocytosis	10	APP,BRAF,CDK5,FMR1,IGF1,IL1RAPL1,LRRK2,NLGN1,PAK1,PPP3CB,PRKCA,PSEN1,SNAP25,SNCA,SOD1,SYN1,SYNJ1
290	GO: Biological Process	GO:0006816	calcium ion transport	GeneOntologyBiologicalProcess_GO:0006816_calcium ion transport	10	ACE,ADORA2A,ADRB2,AGT,ATP2B2,BCL2,CASR,CDK5,CHRNA4,CHRNA7,CTNNB1,DRD1,DRD2,DRD4,FMR1,GRIN1,GRIN2A,GRIN2B,GRM7,IGF1,IL1RAPL1,ITPR3,NGF,NOS1,PSEN1,PSEN2,SNCA
291	GO: Biological Process	GO:0046903	secretion	GeneOntologyBiologicalProcess_GO:0046903_secretion	10	ABAT,ACE,ADORA1,ADORA2A,AGT,AGTR2,APP,ATP2B2,BDNF,BRAF,CASR,CDK5,CHAT,CHRNA4,CHRNA7,COMT,DRD2,DRD3,DRD4,FMR1,GAD1,GNAS,GRIK1,GRIN2B,GRM7,IGF1,IL1RAPL1,ITPR3,KCNMA1,LRRK2,MECP2,NGF,NLGN1,NOS1,NTRK2,PAFAH1B1,PAK1,PPP3CB,PRKCA,PSEN1,SLC18A2,SLC1A3,SLC6A3,SNAP25,SNCA,SOD1,SYN1,SYNJ1
292	GO: Biological Process	GO:0042220	response to cocaine	GeneOntologyBiologicalProcess_GO:0042220_response to cocaine	10	ABAT,CDK5,DLG4,DRD1,DRD2,DRD3,DRD4,DRD5,KALRN,NOS1,SLC18A2,SLC6A3,SNCA
293	GO: Biological Process	GO:0001662	behavioral fear response	GeneOntologyBiologicalProcess_GO:0001662_behavioral fear response	10	BCL2,BDNF,DRD1,DRD4,GRIK2,GRIN2B,GRM7,KALRN,MECP2
294	GO: Biological Process	GO:0046879	hormone secretion	GeneOntologyBiologicalProcess_GO:0046879_hormone secretion	10	ABAT,ADORA1,AGT,AGTR2,CASR,DRD2,GNAS,ITPR3,NOS1,PPP3CB,PRKCA,SLC18A2,SNAP25
295	GO: Biological Process	GO:0055074	calcium ion homeostasis	GeneOntologyBiologicalProcess_GO:0055074_calcium ion homeostasis	10	AGT,APOE,APP,ATP2B2,BCL2,CASR,CHRNA7,DLG4,DRD1,DRD2,DRD3,DRD4,DRD5,GNAS,GRIK2,GRIN1,ITPR3,NGF,NOS1,PRKCA,PSEN1,PSEN2,SNCA
296	GO: Biological Process	GO:0050769	positive regulation of neurogenesis	GeneOntologyBiologicalProcess_GO:0050769_positive regulation of neurogenesis	10	ACE,APOE,BCL2,BDNF,BRAF,CTNNB1,DRD2,FMR1,IL1RAPL1,KALRN,MAPT,NGF,NLGN1,NTRK1,NTRK2,PAFAH1B1,PSEN1,RELN,SYNJ1,VLDLR
297	GO: Biological Process	GO:0007618	mating	GeneOntologyBiologicalProcess_GO:0007618_mating	10	ABAT,APP,AR,DRD1,DRD4,DRD5,GRIN1,SLC6A4,TH
298	GO: Biological Process	GO:0006793	phosphorus metabolic process	GeneOntologyBiologicalProcess_GO:0006793_phosphorus metabolic process	10	ACE,ACE2,ADORA1,ADORA2A,ADRB2,AGT,AGTR2,ANKK1,APOE,APP,AR,ATP2B2,BCL2,BDNF,BMX,BRAF,CASP3,CASR,CDK5,CDK5R1,CHAT,CHRNA7,CTNNB1,DLG3,DLG4,DRD1,DRD2,DRD3,DRD4,DRD5,DYRK1A,FMR1,GNAS,GRIK2,GRIN1,GRIN2A,GRIN2B,GRIN2D,GRM7,IGF1,KALRN,KRAS,LRRK2,MECP2,NGF,NKX2-1,NOS1,NTRK1,NTRK2,PAFAH1B1,PAK1,PPP3CB,PRKCA,PSEN1,PSEN2,RELN,SNCA,SOD1,SYNJ1,TSC2,VLDLR,WWC1
299	GO: Biological Process	GO:0010604	positive regulation of macromolecule metabolic process	GeneOntologyBiologicalProcess_GO:0010604_positive regulation of macromolecule metabolic process	10	ACE,ADORA1,ADRB2,AGT,AGTR2,APOE,APP,AR,BCL2,BDNF,BRAF,CASP3,CASR,CDK5,CDK5R1,CHRNA7,CTNNB1,DRD2,DRD3,DRD4,DYRK1A,FMR1,GNAS,GRIN1,IGF1,KRAS,LRRK2,MECP2,NGF,NKX2-1,NOS1,NTRK1,NTRK2,PAK1,PBX3,PPP3CB,PRKCA,PSEN1,PSEN2,RELN,SLC6A4,SNCA,SOD1,TSC2,VLDLR,WWC1
300	GO: Biological Process	GO:0014070	response to organic cyclic compound	GeneOntologyBiologicalProcess_GO:0014070_response to organic cyclic compound	10	ABAT,ADH1C,ADORA2A,ADRB2,AGTR2,APP,AR,BCL2,BDNF,BRAF,CASP3,CDK5,CHRNA4,CHRNA7,COMT,CTNNB1,DLG4,DRD1,DRD2,DRD3,DRD4,DRD5,GNAS,GRIN1,IGF1,ITPR3,KALRN,KCNMA1,KRAS,LRRK2,MECP2,MT-ND3,NOS1,NPC1,NTRK1,NTRK2,PAK1,PRKCA,SLC18A2,SLC6A3,SLC6A4,SNCA,SOD1,SRR,TH,TPH2,TYR
301	GO: Biological Process	GO:0046189	phenol-containing compound biosynthetic process	GeneOntologyBiologicalProcess_GO:0046189_phenol-containing compound biosynthetic process	10	AGTR2,DBH,HDC,SLC6A3,SNCA,TH,TPH2,TYR
303	GO: Biological Process	GO:1903792	negative regulation of anion transport	GeneOntologyBiologicalProcess_GO:1903792_negative regulation of anion transport	10	ABAT,ADORA1,AGTR2,APOE,DRD2,GRM7,NOS1,SNCA
304	GO: Biological Process	GO:0048732	gland development	GeneOntologyBiologicalProcess_GO:0048732_gland development	10	ADRB2,AR,ATP2B2,BCL2,BRAF,CTNNB1,DRD2,IGF1,NKX2-1,PSEN1,PSEN2,SLC6A3,SOD1,TYR
305	GO: Biological Process	GO:0051129	negative regulation of cellular component organization	GeneOntologyBiologicalProcess_GO:0051129_negative regulation of cellular component organization	10	ACE,APOE,AR,CDK5,CDK5R1,CTNNB1,DLG4,IGF1,LRRK2,MECP2,NKX2-1,NLGN1,PAFAH1B1,PSEN1,PSEN2,SNCA
306	GO: Biological Process	GO:0009712	catechol-containing compound metabolic process	GeneOntologyBiologicalProcess_GO:0009712_catechol-containing compound metabolic process	10	ABAT,AGTR2,COMT,DBH,DRD1,DRD2,DRD3,DRD4,GRIN2A,HDC,MAOA,SLC6A3,SNCA,TH
307	GO: Biological Process	GO:1900544	positive regulation of purine nucleotide metabolic process	GeneOntologyBiologicalProcess_GO:1900544_positive regulation of purine nucleotide metabolic process	10	ADORA2A,ADRB2,APOE,DRD1,DRD5,GNAS,IGF1,NOS1,PRKCA
308	GO: Biological Process	GO:0031281	positive regulation of cyclase activity	GeneOntologyBiologicalProcess_GO:0031281_positive regulation of cyclase activity	10	ADORA2A,ADRB2,DRD1,DRD5,GNAS,NOS1,PRKCA
310	GO: Biological Process	GO:0023014	signal transduction by protein phosphorylation	GeneOntologyBiologicalProcess_GO:0023014_signal transduction by protein phosphorylation	10	ACE2,ADORA1,ADRB2,AGT,APOE,AR,BRAF,CASR,CHRNA7,CTNNB1,DLG4,DRD2,DRD4,GRIK2,GRIN1,GRIN2A,GRIN2B,GRIN2D,IGF1,KRAS,LRRK2,NGF,NTRK1,NTRK2,PAFAH1B1,PAK1,PRKCA,PSEN1,SOD1,TSC2,WWC1
311	GO: Biological Process	GO:1903524	positive regulation of blood circulation	GeneOntologyBiologicalProcess_GO:1903524_positive regulation of blood circulation	10	ACE2,ADRB2,AGT,AGTR2,CASR,CHRNA7,DBH,KCNMA1,NOS1
312	GO: Biological Process	GO:0001763	morphogenesis of a branching structure	GeneOntologyBiologicalProcess_GO:0001763_morphogenesis of a branching structure	10	AGT,AGTR2,AR,BCL2,CASR,CTNNB1,DRD2,IGF1,KRAS,LRRK2,NKX2-1,PAK1
313	GO: Biological Process	GO:0019637	organophosphate metabolic process	GeneOntologyBiologicalProcess_GO:0019637_organophosphate metabolic process	10	ADORA2A,ADRB2,APOE,ATP2B2,BDNF,CHAT,DLG3,DLG4,DRD1,DRD2,DRD3,DRD4,DRD5,GNAS,GRM7,IGF1,LRRK2,MECP2,NKX2-1,NOS1,PAFAH1B1,PRKCA,SNCA,SYNJ1
314	GO: Biological Process	GO:0061097	regulation of protein tyrosine kinase activity	GeneOntologyBiologicalProcess_GO:0061097_regulation of protein tyrosine kinase activity	10	ACE,ADORA1,AGT,APP,PSEN1,PSEN2,RELN
315	GO: Biological Process	GO:0043112	receptor metabolic process	GeneOntologyBiologicalProcess_GO:0043112_receptor metabolic process	10	ACE2,APOE,CDK5,DLG4,DRD2,DRD3,FMR1,GRIA1,GRIA3,PSEN1,PSEN2,SNCA
316	GO: Biological Process	GO:0021700	developmental maturation	GeneOntologyBiologicalProcess_GO:0021700_developmental maturation	10	APP,BCL2,CDK5R1,CTNNB1,DLG4,GRIN1,IGF1,KCNMA1,LRRK2,MECP2,NGF,PSEN1,PSEN2,RELN
317	GO: Biological Process	GO:0048168	regulation of neuronal synaptic plasticity	GeneOntologyBiologicalProcess_GO:0048168_regulation of neuronal synaptic plasticity	10	AGT,APOE,BDNF,DLG4,DRD1,DRD2,DRD5,GRIK1,GRIK2,GRIN1,GRIN2A,GRIN2B,KRAS,SNCA
319	GO: Biological Process	GO:0065009	regulation of molecular function	GeneOntologyBiologicalProcess_GO:0065009_regulation of molecular function	10	ACE,ADORA1,ADORA2A,ADRB2,AGT,AGTR2,APOE,APP,AR,BCL2,BDNF,BRAF,CASP3,CASR,CDK5,CDK5R1,CHRNA4,CHRNA7,CTNNB1,DLG3,DLG4,DRD1,DRD2,DRD3,DRD4,DRD5,FMR1,GNAS,GRIN1,GRIN2A,GRIN2B,GRIN2D,GRM7,IGF1,KALRN,KCNAB1,KRAS,LRRK2,NGB,NGF,NLGN1,NOS1,NTRK1,NTRK2,PACS1,PAFAH1B1,PAK1,PRKCA,PSEN1,PSEN2,RELN,SNCA,SOD1,TSC2,VLDLR
320	GO: Biological Process	GO:0045761	regulation of adenylate cyclase activity	GeneOntologyBiologicalProcess_GO:0045761_regulation of adenylate cyclase activity	10	ADORA2A,ADRB2,DRD1,DRD2,DRD3,DRD4,DRD5,GNAS,GRM7,PRKCA
321	GO: Biological Process	GO:0009725	response to hormone	GeneOntologyBiologicalProcess_GO:0009725_response to hormone	10	ADH1C,ADRB2,AGT,AGTR2,AR,BCL2,BDNF,BRAF,CASP3,CTNNB1,DRD1,DRD4,GNAS,IGF1,KCNMA1,KRAS,MECP2,MT-ND3,NKX2-1,NOS1,NPC1,NTRK2,PAK1,PRKCA,SLC18A2,SLC6A4,TH,TPH2,TSC2,VLDLR
322	GO: Biological Process	GO:0030808	regulation of nucleotide biosynthetic process	GeneOntologyBiologicalProcess_GO:0030808_regulation of nucleotide biosynthetic process	10	ADORA2A,ADRB2,APOE,DRD1,DRD2,DRD3,DRD4,DRD5,GNAS,GRM7,NOS1,PRKCA
323	GO: Biological Process	GO:0010976	positive regulation of neuron projection development	GeneOntologyBiologicalProcess_GO:0010976_positive regulation of neuron projection development	10	APOE,BDNF,BRAF,FMR1,IL1RAPL1,KALRN,MAPT,NGF,NLGN1,NTRK1,NTRK2,PAFAH1B1,PSEN1,RELN,VLDLR
324	GO: Biological Process	GO:0006936	muscle contraction	GeneOntologyBiologicalProcess_GO:0006936_muscle contraction	10	ABAT,ACE2,ADORA1,ADRB2,AGT,DRD1,DRD2,KCNMA1,NOS1,PRKCA,PSEN2,SOD1
325	GO: Biological Process	GO:0051093	negative regulation of developmental process	GeneOntologyBiologicalProcess_GO:0051093_negative regulation of developmental process	10	ADRB2,AGT,APOE,APP,BCL2,BDNF,CDK5,CDK5R1,CTNNB1,DRD3,GNAS,IGF1,KRAS,MECP2,NKX2-1,NLGN1,PAFAH1B1,PSEN1,SLC6A4,WWC1
326	GO: Biological Process	GO:0051703	intraspecies interaction between organisms	GeneOntologyBiologicalProcess_GO:0051703_intraspecies interaction between organisms	10	DLG4,DRD1,DRD3,DRD4,GAD1,GRIN1,KALRN,KRAS,MECP2,PPP3CB,SLC6A4,TH
327	GO: Biological Process	GO:2000300	regulation of synaptic vesicle exocytosis	GeneOntologyBiologicalProcess_GO:2000300_regulation of synaptic vesicle exocytosis	10	BRAF,FMR1,LRRK2,NLGN1,SYN1
328	GO: Biological Process	GO:0031328	positive regulation of cellular biosynthetic process	GeneOntologyBiologicalProcess_GO:0031328_positive regulation of cellular biosynthetic process	10	ADORA2A,ADRB2,AGT,AGTR2,APOE,APP,AR,BDNF,CTNNB1,DRD1,DRD2,DRD3,DRD5,FMR1,GNAS,GRIN1,IGF1,KRAS,MECP2,NGF,NKX2-1,NOS1,NTRK1,PBX3,PPP3CB,PRKCA,PSEN1,RELN,SNCA,TSC2
329	GO: Biological Process	GO:0007613	memory	GeneOntologyBiologicalProcess_GO:0007613_memory	10	CHAT,CHRNA7,COMT,DBH,DRD1,DRD2,DRD4,GRIA1,GRIN1,GRIN2A,GRIN2B,GRM7,IGF1,ITPR3,KALRN,MECP2,NGF,NTF4,NTRK2,PPP3CB,PSEN1,PSEN2,RELN,SLC6A4,SNAP25,TH,VLDLR
330	GO: Biological Process	GO:0032880	regulation of protein localization	GeneOntologyBiologicalProcess_GO:0032880_regulation of protein localization	10	ABAT,ADORA2A,AGT,AGTR2,AR,BCL2,CASR,CDK5,CDK5R1,CTNNB1,DRD2,DRD3,DRD4,GNAS,IGF1,ITPR3,KALRN,LRRK2,NLGN1,NOS1,PPP3CB,PRKCA,SNAP25
331	GO: Biological Process	GO:0048585	negative regulation of response to stimulus	GeneOntologyBiologicalProcess_GO:0048585_negative regulation of response to stimulus	10	ABAT,ACE2,ADORA1,ADORA2A,ADRB2,AGT,AGTR2,APOE,AR,BCL2,CHRNA7,CTNNB1,DRD1,DRD2,DRD3,DYRK1A,GRIN1,IGF1,LRRK2,NGB,NKX2-1,NOS1,NPC1,PAFAH1B1,PPP3CB,PRKCA,PSEN1,PSEN2,SLC6A3,SNCA,TSC2,WWC1
332	GO: Biological Process	GO:0048513	animal organ development	GeneOntologyBiologicalProcess_GO:0048513_animal organ development	10	ABAT,ACE,ADRB2,AGT,AGTR2,APP,AR,ATP2B2,BCL2,BDNF,BMX,BRAF,CASP3,CDK5,CDK5R1,CHAT,CTNNB1,DRD1,DRD2,DRD4,GNAS,GRIN1,GRIN2B,IGF1,KCNAB1,KCNMA1,KRAS,LRRK2,MAPT,MECP2,NKX2-1,NTF4,NTRK1,NTRK2,PAFAH1B1,PAK1,PBX3,PEX13,PPP3CB,PRKCA,PSEN1,PSEN2,RELN,SLC6A3,SLC6A4,SOD1,SRR,TH,TSC2,TYR,VLDLR
333	GO: Biological Process	GO:0031325	positive regulation of cellular metabolic process	GeneOntologyBiologicalProcess_GO:0031325_positive regulation of cellular metabolic process	10	ABAT,ACE,ACE2,ADORA1,ADORA2A,ADRB2,AGT,AGTR2,APOE,APP,AR,BCL2,BDNF,BRAF,CASP3,CDK5,CDK5R1,CHRNA7,COMT,CTNNB1,DRD1,DRD2,DRD3,DRD4,DRD5,DYRK1A,FMR1,GNAS,GRIN1,IGF1,KRAS,LRRK2,MECP2,NGF,NKX2-1,NOS1,NTRK1,NTRK2,PAK1,PBX3,PPP3CB,PRKCA,PSEN1,PSEN2,RELN,SNCA,SOD1,TSC2,VLDLR,WWC1
334	GO: Biological Process	GO:0051704	multi-organism process	GeneOntologyBiologicalProcess_GO:0051704_multi-organism process	10	ABAT,ACE,ACE2,ADRB2,AGT,APOE,APP,AR,BCL2,CASP3,COMT,CTNNB1,DACH1,DLG4,DRD1,DRD3,DRD4,DRD5,FMR1,GAD1,GNAS,GRIN1,GRIN2B,IGF1,KALRN,KRAS,MAPT,MECP2,NKX2-1,NOS1,NPC1,PACS1,PAFAH1B1,PEX13,PPP3CB,PRKCA,SCN1A,SLC1A3,SLC6A4,SNCA,SOD1,SRR,TH,TSC2,VLDLR
335	GO: Biological Process	GO:0003012	muscle system process	GeneOntologyBiologicalProcess_GO:0003012_muscle system process	10	ABAT,ACE2,ADORA1,ADRB2,AGT,AGTR2,AR,DRD1,DRD2,IGF1,KCNMA1,NOS1,PRKCA,PSEN2,SOD1
336	GO: Biological Process	GO:0030802	regulation of cyclic nucleotide biosynthetic process	GeneOntologyBiologicalProcess_GO:0030802_regulation of cyclic nucleotide biosynthetic process	10	ADORA2A,ADRB2,APOE,DRD1,DRD2,DRD3,DRD4,DRD5,GNAS,GRM7,NOS1,PRKCA
337	GO: Biological Process	GO:0010647	positive regulation of cell communication	GeneOntologyBiologicalProcess_GO:0010647_positive regulation of cell communication	10	ABAT,ADORA1,ADORA2A,ADRB2,AGT,AGTR2,AR,BCL2,BDNF,BRAF,CASR,CHRNA7,CTNNB1,DLG4,DRD1,DRD2,DRD3,DRD4,FMR1,GNAS,GRIA1,GRIK1,GRIK2,GRIN1,GRIN2A,GRIN2B,IGF1,ITPR3,KRAS,LRRK2,MECP2,NGF,NLGN1,NOS1,NTRK1,NTRK2,PAFAH1B1,PAK1,PPP3CB,PRKCA,PSEN1,PSEN2,RELN,SLC1A3,SNAP25,SNCA,SOD1,SYNJ1,TSC2,WWC1
338	GO: Biological Process	GO:0036465	synaptic vesicle recycling	GeneOntologyBiologicalProcess_GO:0036465_synaptic vesicle recycling	10	CDK5,LRRK2,NLGN1,SNCA,SYNJ1
339	GO: Biological Process	GO:0032990	cell part morphogenesis	GeneOntologyBiologicalProcess_GO:0032990_cell part morphogenesis	10	ADORA2A,APOE,APP,BCL2,BDNF,BRAF,CDK5,CDK5R1,DLG4,DRD2,GRIN1,IL1RAPL1,KALRN,KRAS,LRRK2,MAPT,NGF,NKX2-1,NLGN1,NTF4,NTRK1,NTRK2,PAFAH1B1,PAK1,PPP3CB,PRKCA,PSEN1,RELN,VLDLR
340	GO: Biological Process	GO:0048609	multicellular organismal reproductive process	GeneOntologyBiologicalProcess_GO:0048609_multicellular organismal reproductive process	10	ACE,ADRB2,AGT,APP,AR,BCL2,CHAT,CHRNA7,COMT,CTNNB1,DBH,DRD1,DRD4,DRD5,GRIN1,IGF1,PAFAH1B1,SLC6A4,SOD1,TH
341	GO: Biological Process	GO:0006164	purine nucleotide biosynthetic process	GeneOntologyBiologicalProcess_GO:0006164_purine nucleotide biosynthetic process	10	ADORA2A,ADRB2,APOE,DRD1,DRD2,DRD3,DRD4,DRD5,GNAS,GRM7,NOS1,PRKCA
342	GO: Biological Process	GO:1902803	regulation of synaptic vesicle transport	GeneOntologyBiologicalProcess_GO:1902803_regulation of synaptic vesicle transport	10	BRAF,CDK5,FMR1,LRRK2,NLGN1,SNCA,SYN1,SYNJ1
343	GO: Biological Process	GO:0060080	inhibitory postsynaptic potential	GeneOntologyBiologicalProcess_GO:0060080_inhibitory postsynaptic potential	10	ABAT,ADORA2A,BDNF,CHRNA4,DRD4,GRIK1,GRIK2,NLGN1
344	GO: Biological Process	GO:0050708	regulation of protein secretion	GeneOntologyBiologicalProcess_GO:0050708_regulation of protein secretion	10	ABAT,ADORA2A,AGT,AGTR2,CASR,DRD2,DRD3,DRD4,GNAS,IGF1,ITPR3,NOS1,PPP3CB,PRKCA,SNAP25
345	GO: Biological Process	GO:0035637	multicellular organismal signaling	GeneOntologyBiologicalProcess_GO:0035637_multicellular organismal signaling	10	ACE2,AGT,ATP2B2,CHRNA7,DRD1,DRD5,FMR1,GRIA1,GRIK2,GRM7,ITPR3,KCND2,KCNMA1,NOS1,PAFAH1B1,SCN1A,SOD1
346	GO: Biological Process	GO:0032879	regulation of localization	GeneOntologyBiologicalProcess_GO:0032879_regulation of localization	10	ABAT,ACE,ADORA1,ADORA2A,ADRB2,AGT,AGTR2,APOE,AR,ATP2B2,BCL2,BRAF,CASR,CDK5,CDK5R1,CHRNA4,CHRNA7,COMT,CTNNB1,DACH1,DLG4,DRD1,DRD2,DRD3,DRD4,DRD5,FMR1,GNAS,GRIK1,GRIN1,GRIN2A,GRIN2B,GRIN2D,GRM7,IGF1,IL1RAPL1,ITPR3,KALRN,KCNAB1,KCND2,KCNMA1,LRRK2,MAPT,NGF,NKX2-1,NLGN1,NOS1,NTRK2,PAK1,PPP3CB,PRKCA,RELN,SCN1A,SLC18A2,SNAP25,SNCA,SYN1,SYNJ1,TSC2,WWC1
347	GO: Biological Process	GO:1900373	positive regulation of purine nucleotide biosynthetic process	GeneOntologyBiologicalProcess_GO:1900373_positive regulation of purine nucleotide biosynthetic process	10	ADORA2A,ADRB2,APOE,DRD1,DRD5,GNAS,NOS1,PRKCA
348	GO: Biological Process	GO:0045055	regulated exocytosis	GeneOntologyBiologicalProcess_GO:0045055_regulated exocytosis	10	APP,BRAF,CDK5,FMR1,IGF1,LRRK2,NLGN1,PPP3CB,PSEN1,SNAP25,SOD1,SYN1,SYNJ1
349	GO: Biological Process	GO:0050435	amyloid-beta metabolic process	GeneOntologyBiologicalProcess_GO:0050435_amyloid-beta metabolic process	10	ACE,APOE,BACE1,PSEN1,PSEN2
350	GO: Biological Process	GO:1901575	organic substance catabolic process	GeneOntologyBiologicalProcess_GO:1901575_organic substance catabolic process	10	ABAT,ACE,ACE2,ADH1C,ADORA1,ADRB2,APOE,BACE1,CASP3,CDK5,COMT,CTNNB1,DBH,DRD1,FAAH,FMR1,GAD1,GRIN2A,HDC,IGF1,LRRK2,MAOA,NOS1,PAFAH1B1,PEX13,PSEN1,PSEN2,SLC6A3,SYNJ1
351	GO: Biological Process	GO:0032102	negative regulation of response to external stimulus	GeneOntologyBiologicalProcess_GO:0032102_negative regulation of response to external stimulus	10	ABAT,ADORA1,ADORA2A,ADRB2,APOE,CHRNA7,DRD1,DRD2,DRD3,GRIN1,LRRK2,NPC1,SLC6A3
353	GO: Biological Process	GO:0048468	cell development	GeneOntologyBiologicalProcess_GO:0048468_cell development	10	ACE,ADORA2A,AGT,AGTR2,APOE,APP,AR,ATP2B2,BCL2,BDNF,BRAF,CASP3,CDK5,CDK5R1,CHAT,CTNNB1,DLG4,DRD1,DRD2,DRD3,FMR1,GRIN1,IGF1,IL1RAPL1,KALRN,KCNMA1,KRAS,LRRK2,MAPT,MECP2,NGB,NGF,NKX2-1,NLGN1,NOS1,NTF4,NTRK1,NTRK2,PAFAH1B1,PAK1,PBX3,PPP3CB,PRKCA,PSEN1,RELN,SLC1A3,SLC6A4,SNAP25,SOD1,SYNJ1,TH,VLDLR
354	GO: Biological Process	GO:0001976	neurological system process involved in regulation of systemic arterial blood pressure	GeneOntologyBiologicalProcess_GO:0001976_neurological system process involved in regulation of systemic arterial blood pressure	10	ACE2,AGT,AGTR2,CHRNA7,DRD2,MECP2
355	GO: Biological Process	GO:0007612	learning	GeneOntologyBiologicalProcess_GO:0007612_learning	10	ADRB2,APP,BDNF,BRAF,CDK5,CHRNA7,COMT,DBH,DLG4,DRD1,DRD2,DRD3,DRD4,DRD5,GRIN1,GRIN2A,GRIN2B,GRM7,KRAS,MECP2,NTRK2,PAK1,PPP3CB,RELN,SNAP25,SYNJ1,TH
356	GO: Biological Process	GO:0042327	positive regulation of phosphorylation	GeneOntologyBiologicalProcess_GO:0042327_positive regulation of phosphorylation	10	ACE,ADORA1,ADRB2,AGT,AR,BCL2,BDNF,BRAF,CDK5,CDK5R1,CHRNA7,CTNNB1,DRD2,DRD4,FMR1,GNAS,IGF1,KRAS,LRRK2,NGF,NTRK1,NTRK2,PAK1,PRKCA,PSEN1,RELN,SNCA,SOD1,VLDLR,WWC1
357	GO: Biological Process	GO:0021761	limbic system development	GeneOntologyBiologicalProcess_GO:0021761_limbic system development	10	CASP3,CDK5,CDK5R1,DRD1,DRD2,NKX2-1,PAFAH1B1,PAK1,RELN
358	GO: Biological Process	GO:0016079	synaptic vesicle exocytosis	GeneOntologyBiologicalProcess_GO:0016079_synaptic vesicle exocytosis	10	BRAF,CDK5,FMR1,LRRK2,NLGN1,PSEN1,SNAP25,SYN1,SYNJ1
359	GO: Biological Process	GO:0036293	response to decreased oxygen levels	GeneOntologyBiologicalProcess_GO:0036293_response to decreased oxygen levels	10	ABAT,ADORA1,ADRB2,BCL2,CASP3,CHAT,CHRNA4,CHRNA7,DRD1,DRD2,IGF1,KCND2,KCNMA1,MECP2,NOS1,PAK1,PSEN2,SLC6A4,TH,TSC2,VLDLR
360	GO: Biological Process	GO:0007600	sensory perception	GeneOntologyBiologicalProcess_GO:0007600_sensory perception	10	ACE,ADORA1,ADORA2A,ADRB2,ATP2B2,CASP3,CDK5,CHRNA4,COMT,DRD2,GNAS,GRIN1,GRIN2A,GRIN2B,GRIN2D,GRM7,IGF1,ITPR3,KCND2,KCNMA1,MECP2,NGB,NGF,NOS1,NTRK1,SLC1A3,SLC6A3,SOD1,TH,TYR
361	GO: Biological Process	GO:0072522	purine-containing compound biosynthetic process	GeneOntologyBiologicalProcess_GO:0072522_purine-containing compound biosynthetic process	10	ADORA2A,ADRB2,APOE,DRD1,DRD2,DRD3,DRD4,DRD5,GNAS,GRM7,NOS1,PRKCA
362	GO: Biological Process	GO:0042069	regulation of catecholamine metabolic process	GeneOntologyBiologicalProcess_GO:0042069_regulation of catecholamine metabolic process	10	ABAT,COMT,DRD1,DRD4,SLC6A3,SNCA
363	GO: Biological Process	GO:0060284	regulation of cell development	GeneOntologyBiologicalProcess_GO:0060284_regulation of cell development	10	ACE,APOE,APP,BCL2,BDNF,BRAF,CDK5,CDK5R1,CTNNB1,DRD2,DRD3,FMR1,GRIN1,IGF1,IL1RAPL1,KALRN,LRRK2,MAPT,MECP2,NGF,NKX2-1,NLGN1,NOS1,NTF4,NTRK1,NTRK2,PAFAH1B1,PSEN1,RELN,SLC6A4,SNAP25,SYNJ1,VLDLR
364	GO: Biological Process	GO:0035264	multicellular organism growth	GeneOntologyBiologicalProcess_GO:0035264_multicellular organism growth	10	ADRB2,AGT,APP,AR,BCL2,DRD2,DRD3,GNAS,IGF1,SLC6A3,SOD1
365	GO: Biological Process	GO:0035813	regulation of renal sodium excretion	GeneOntologyBiologicalProcess_GO:0035813_regulation of renal sodium excretion	10	ADORA1,ADORA2A,AGT,AGTR2,COMT,DRD2,DRD3,GNAS
366	GO: Biological Process	GO:0040011	locomotion	GeneOntologyBiologicalProcess_GO:0040011_locomotion	10	ACE,ACE2,ADORA1,ADORA2A,AGT,AGTR2,APOE,APP,ATP2B2,BCL2,BDNF,BRAF,CASR,CDK5,CDK5R1,CHRNA7,CTNNB1,DACH1,DBH,DRD1,DRD2,DRD3,DRD5,GRIN2A,IGF1,KRAS,LRRK2,MAPT,NKX2-1,NPC1,NTRK1,NTRK2,PAFAH1B1,PAK1,PEX13,PPP3CB,PRKCA,PSEN1,PSEN2,RELN,SNCA,TSC2,WWC1
367	GO: Biological Process	GO:0009713	catechol-containing compound biosynthetic process	GeneOntologyBiologicalProcess_GO:0009713_catechol-containing compound biosynthetic process	10	AGTR2,DBH,HDC,SLC6A3,SNCA,TH
368	GO: Biological Process	GO:0036211	protein modification process	GeneOntologyBiologicalProcess_GO:0036211_protein modification process	10	ACE,ACE2,ADORA1,ADORA2A,ADRB2,AGT,AGTR2,ANKK1,APOE,APP,AR,BCL2,BDNF,BMX,BRAF,CASP3,CASR,CDK5,CDK5R1,CHRNA7,CTNNB1,DLG3,DLG4,DRD1,DRD2,DRD4,DRD5,DYRK1A,FMR1,GAD1,GNAS,GRIK2,GRIN1,GRIN2A,GRIN2B,GRIN2D,IGF1,KALRN,KRAS,LRRK2,MECP2,NGF,NOS1,NPC1,NTRK1,NTRK2,PAFAH1B1,PAK1,PPP3CB,PRKCA,PSEN1,PSEN2,RELN,SNCA,SOD1,TSC2,VLDLR,WWC1
369	GO: Biological Process	GO:0050890	cognition	GeneOntologyBiologicalProcess_GO:0050890_cognition	10	ADORA1,ADRB2,APP,BDNF,BRAF,CASP3,CDK5,CHAT,CHRNA4,CHRNA7,COMT,DBH,DLG4,DRD1,DRD2,DRD3,DRD4,DRD5,GNAS,GRIA1,GRIN1,GRIN2A,GRIN2B,GRM7,IGF1,ITPR3,KALRN,KCNAB1,KRAS,MECP2,NGF,NTF4,NTRK1,NTRK2,PAFAH1B1,PAK1,PPP3CB,PRKCA,PSEN1,PSEN2,RELN,SLC6A4,SNAP25,SYNJ1,TH,VLDLR
371	GO: Biological Process	GO:0007189	adenylate cyclase-activating G-protein coupled receptor signaling pathway	GeneOntologyBiologicalProcess_GO:0007189_adenylate cyclase-activating G-protein coupled receptor signaling pathway	10	ADORA2A,ADRB2,DRD1,DRD2,DRD3,DRD5,GNAS
372	GO: Biological Process	GO:0009887	animal organ morphogenesis	GeneOntologyBiologicalProcess_GO:0009887_animal organ morphogenesis	10	AGT,AGTR2,AR,ATP2B2,BCL2,BDNF,BRAF,CTNNB1,GNAS,IGF1,KRAS,LRRK2,NKX2-1,NTF4,NTRK2,PAFAH1B1,PSEN1,PSEN2,SLC6A4,SOD1,TH
373	GO: Biological Process	GO:0050772	positive regulation of axonogenesis	GeneOntologyBiologicalProcess_GO:0050772_positive regulation of axonogenesis	10	APOE,BDNF,BRAF,MAPT,NGF,NTRK2,PAFAH1B1
374	GO: Biological Process	GO:0048878	chemical homeostasis	GeneOntologyBiologicalProcess_GO:0048878_chemical homeostasis	10	ADORA1,ADORA2A,AGT,AGTR2,APOE,APP,ATP2B2,BCL2,CASR,CHRNA7,COMT,DBH,DLG4,DRD1,DRD2,DRD3,DRD4,DRD5,GNAS,GRIK2,GRIN1,IGF1,ITPR3,KCNMA1,LRRK2,NGF,NOS1,NPC1,PPP3CB,PRKCA,PSEN1,PSEN2,SLC18A2,SNCA,SOD1,TH
375	GO: Biological Process	GO:0007399	nervous system development	GeneOntologyBiologicalProcess_GO:0007399_nervous system development	10	ABAT,ACE,ADORA1,ADORA2A,AGT,AGTR2,APOE,APP,ATP2B2,BCL2,BDNF,BRAF,CASP3,CDK5,CDK5R1,CHAT,CTNNB1,DLG3,DLG4,DRD1,DRD2,DRD3,DYRK1A,FMR1,GRIK1,GRIN1,GRIN2A,IGF1,IL1RAPL1,KALRN,KCNAB1,KCNMA1,KRAS,LRRK2,MAPT,MECP2,NGB,NGF,NKX2-1,NLGN1,NOS1,NTF4,NTRK1,NTRK2,PAFAH1B1,PAK1,PBX3,PEX13,PPP3CB,PRKCA,PSEN1,PSEN2,RELN,SLC1A3,SLC6A3,SLC6A4,SNAP25,SOD1,SRR,SYNJ1,TH,TSC2,VLDLR
376	GO: Biological Process	GO:0002087	regulation of respiratory gaseous exchange by neurological system process	GeneOntologyBiologicalProcess_GO:0002087_regulation of respiratory gaseous exchange by neurological system process	10	ADORA1,MECP2,NLGN1,PBX3
377	GO: Biological Process	GO:0055080	cation homeostasis	GeneOntologyBiologicalProcess_GO:0055080_cation homeostasis	10	ADORA1,ADORA2A,AGT,AGTR2,APOE,APP,ATP2B2,BCL2,CASR,CHRNA7,COMT,DLG4,DRD1,DRD2,DRD3,DRD4,DRD5,GNAS,GRIK2,GRIN1,ITPR3,KCNMA1,LRRK2,NGF,NOS1,PRKCA,PSEN1,PSEN2,SNCA,SOD1
378	GO: Biological Process	GO:0021895	cerebral cortex neuron differentiation	GeneOntologyBiologicalProcess_GO:0021895_cerebral cortex neuron differentiation	10	DRD1,DRD2,NKX2-1,PAFAH1B1,PSEN1
379	GO: Biological Process	GO:0048869	cellular developmental process	GeneOntologyBiologicalProcess_GO:0048869_cellular developmental process	10	ACE,ADORA2A,ADRB2,AGT,AGTR2,APOE,APP,AR,ATP2B2,BCL2,BDNF,BMX,BRAF,CASP3,CDK5,CDK5R1,CHAT,CTNNB1,DLG4,DRD1,DRD2,DRD3,FMR1,GNAS,GRIN1,GRIN2A,IGF1,IL1RAPL1,KALRN,KCNAB1,KCNMA1,KRAS,LRRK2,MAPT,MECP2,NGB,NGF,NKX2-1,NLGN1,NOS1,NTF4,NTRK1,NTRK2,PAFAH1B1,PAK1,PBX3,PEX13,PPP3CB,PRKCA,PSEN1,PSEN2,RELN,SLC1A3,SLC6A4,SNAP25,SOD1,SYNJ1,TH,VLDLR
380	GO: Biological Process	GO:0030799	regulation of cyclic nucleotide metabolic process	GeneOntologyBiologicalProcess_GO:0030799_regulation of cyclic nucleotide metabolic process	10	ADORA2A,ADRB2,APOE,DRD1,DRD2,DRD3,DRD4,DRD5,GNAS,GRM7,NOS1,PRKCA
381	GO: Biological Process	GO:0050804	modulation of chemical synaptic transmission	GeneOntologyBiologicalProcess_GO:0050804_modulation of chemical synaptic transmission	10	ABAT,ADORA1,ADORA2A,AGT,APOE,ATP2B2,BDNF,BRAF,CDK5,CHAT,CHRNA4,CHRNA7,DLG4,DRD1,DRD2,DRD3,DRD4,DRD5,FMR1,GRIA1,GRIK1,GRIK2,GRIN1,GRIN2A,GRIN2B,GRM7,ITPR3,KALRN,KRAS,LRRK2,MAPT,MECP2,NGF,NLGN1,NOS1,NTRK1,NTRK2,PAK1,PPP3CB,PSEN1,PSEN2,RELN,SLC1A3,SLC6A4,SNAP25,SNCA,SYN1,SYNJ1
382	GO: Biological Process	GO:0006950	response to stress	GeneOntologyBiologicalProcess_GO:0006950_response to stress	10	ABAT,ACE,ACE2,ADORA1,ADORA2A,ADRB2,AGT,AGTR2,APOE,APP,BCL2,BDNF,BMX,BRAF,CASP3,CASR,CDK5,CDK5R1,CHAT,CHRNA4,CHRNA7,COMT,DBH,DRD1,DRD2,DRD4,DRD5,DYRK1A,FMR1,GNAS,GRIK1,GRIK2,GRIN2A,GRIN2B,GRM7,IGF1,ITPR3,KALRN,KCND2,KCNMA1,KRAS,LRRK2,MAPT,MECP2,MT-ND1,MT-ND3,NGB,NKX2-1,NOS1,NPC1,NTRK1,NTRK2,PACS1,PAFAH1B1,PAK1,PEX13,PPP3CB,PRKCA,PSEN1,PSEN2,RELN,SCN1A,SLC18A2,SLC1A3,SLC6A4,SNCA,SOD1,TH,TSC2,VLDLR
383	GO: Biological Process	GO:0045777	positive regulation of blood pressure	GeneOntologyBiologicalProcess_GO:0045777_positive regulation of blood pressure	10	ACE,ADORA1,ADRB2,AGT,CHRNA7,DRD5
384	GO: Biological Process	GO:0050767	regulation of neurogenesis	GeneOntologyBiologicalProcess_GO:0050767_regulation of neurogenesis	10	ACE,APOE,APP,BCL2,BDNF,BRAF,CDK5,CDK5R1,CTNNB1,DRD2,DRD3,FMR1,GRIN1,IL1RAPL1,KALRN,LRRK2,MAPT,MECP2,NGF,NLGN1,NOS1,NTF4,NTRK1,NTRK2,PAFAH1B1,PSEN1,RELN,SLC6A4,SNAP25,SYNJ1,VLDLR
385	GO: Biological Process	GO:0070201	regulation of establishment of protein localization	GeneOntologyBiologicalProcess_GO:0070201_regulation of establishment of protein localization	10	ABAT,ADORA2A,AGT,AGTR2,AR,BCL2,CASR,CDK5,CDK5R1,DRD2,DRD3,DRD4,GNAS,IGF1,ITPR3,LRRK2,NOS1,PPP3CB,PRKCA,SNAP25
386	GO: Biological Process	GO:0021819	layer formation in cerebral cortex	GeneOntologyBiologicalProcess_GO:0021819_layer formation in cerebral cortex	10	CDK5,CDK5R1,CTNNB1,PAFAH1B1,RELN
387	GO: Biological Process	GO:0042424	catecholamine catabolic process	GeneOntologyBiologicalProcess_GO:0042424_catecholamine catabolic process	10	COMT,DBH,MAOA,SLC6A3
388	GO: Biological Process	GO:0042221	response to chemical	GeneOntologyBiologicalProcess_GO:0042221_response to chemical	10	ABAT,ACE,ADH1C,ADORA2A,ADRB2,AGT,AGTR2,APOE,APP,AR,BCL2,BDNF,BRAF,CASP3,CASR,CDK5,CDK5R1,CHAT,CHRNA4,CHRNA7,COMT,CTNNB1,DBH,DLG4,DRD1,DRD2,DRD3,DRD4,DRD5,FMR1,GAD1,GNAS,GRIA1,GRIA3,GRIN1,GRIN2A,GRIN2B,IGF1,ITPR3,KALRN,KCND2,KCNMA1,KRAS,LRRK2,MAPT,MECP2,MT-ND1,MT-ND3,NGB,NGF,NKX2-1,NOS1,NPC1,NTRK1,NTRK2,PAFAH1B1,PAK1,PPP3CB,PRKCA,RELN,SLC18A2,SLC1A3,SLC6A3,SLC6A4,SNCA,SOD1,SRR,SYNJ1,TH,TPH2,TSC2,T…
389	GO: Biological Process	GO:0043279	response to alkaloid	GeneOntologyBiologicalProcess_GO:0043279_response to alkaloid	10	ABAT,ADORA2A,BCL2,CASP3,CDK5,CHRNA4,CHRNA7,DLG4,DRD1,DRD2,DRD3,DRD4,DRD5,GRIN1,IGF1,KALRN,NOS1,NTRK1,SLC18A2,SLC6A3,SNCA,SRR,TH
390	GO: Biological Process	GO:0009893	positive regulation of metabolic process	GeneOntologyBiologicalProcess_GO:0009893_positive regulation of metabolic process	10	ABAT,ACE,ACE2,ADORA1,ADORA2A,ADRB2,AGT,AGTR2,APOE,APP,AR,BCL2,BDNF,BRAF,CASP3,CASR,CDK5,CDK5R1,CHRNA7,COMT,CTNNB1,DRD1,DRD2,DRD3,DRD4,DRD5,DYRK1A,FMR1,GNAS,GRIN1,IGF1,KRAS,LRRK2,MECP2,NGF,NKX2-1,NOS1,NTRK1,NTRK2,PAK1,PBX3,PPP3CB,PRKCA,PSEN1,PSEN2,RELN,SLC6A4,SNCA,SOD1,TSC2,VLDLR,WWC1
391	GO: Biological Process	GO:1901216	positive regulation of neuron death	GeneOntologyBiologicalProcess_GO:1901216_positive regulation of neuron death	10	APOE,CASP3,CDK5,CDK5R1,CTNNB1,GRIK2,KCNMA1,NOS1
392	GO: Biological Process	GO:0098916	anterograde trans-synaptic signaling	GeneOntologyBiologicalProcess_GO:0098916_anterograde trans-synaptic signaling	10	ABAT,ADORA1,ADORA2A,ADRB2,AGT,APOE,ATP2B2,BDNF,BRAF,CDK5,CHAT,CHRNA4,CHRNA7,CTNNB1,DBH,DLG3,DLG4,DRD1,DRD2,DRD3,DRD4,DRD5,FMR1,GABRA2,GAD1,GRIA1,GRIA3,GRIK1,GRIK2,GRIN1,GRIN2A,GRIN2B,GRIN2D,GRM7,ITPR3,KALRN,KCND2,KCNMA1,KRAS,LRRK2,MAPT,MECP2,NGF,NLGN1,NOS1,NTRK1,NTRK2,PAFAH1B1,PAK1,PPP3CB,PSEN1,PSEN2,RELN,SLC18A2,SLC1A3,SLC6A3,SLC6A4,SNAP25,SNCA,SYN1,SYNJ1,TH
393	GO: Biological Process	GO:0051960	regulation of nervous system development	GeneOntologyBiologicalProcess_GO:0051960_regulation of nervous system development	10	ACE,APOE,APP,BCL2,BDNF,BRAF,CDK5,CDK5R1,CTNNB1,DRD2,DRD3,FMR1,GRIN1,IGF1,IL1RAPL1,KALRN,LRRK2,MAPT,MECP2,NGF,NLGN1,NOS1,NTF4,NTRK1,NTRK2,PAFAH1B1,PRKCA,PSEN1,RELN,SLC6A4,SNAP25,SYNJ1,VLDLR
394	GO: Biological Process	GO:0051241	negative regulation of multicellular organismal process	GeneOntologyBiologicalProcess_GO:0051241_negative regulation of multicellular organismal process	10	ABAT,ADORA1,ADRB2,AGT,AGTR2,APOE,APP,BCL2,BDNF,CDK5,CDK5R1,CHRNA7,COMT,CTNNB1,DRD1,DRD2,DRD3,GNAS,IGF1,KCNMA1,MECP2,NKX2-1,NLGN1,NOS1,PAFAH1B1,PRKCA,PSEN1,SLC6A4,SOD1,WWC1
395	GO: Biological Process	GO:0003018	vascular process in circulatory system	GeneOntologyBiologicalProcess_GO:0003018_vascular process in circulatory system	10	ACE,ACE2,ADORA1,ADORA2A,ADRB2,AGT,AGTR2,APOE,CASR,DBH,DRD1,DRD5,KCNMA1,NOS1,SLC6A4,SOD1
396	GO: Biological Process	GO:0007610	behavior	GeneOntologyBiologicalProcess_GO:0007610_behavior	10	ABAT,ACE,ACE2,ADH1C,ADORA1,ADORA2A,ADRB2,AGT,AGTR2,APP,AR,ATP2B2,BCL2,BDNF,BRAF,CASP3,CASR,CDK5,CHAT,CHRNA4,CHRNA7,COMT,DACH1,DBH,DLG4,DRD1,DRD2,DRD3,DRD4,DRD5,GAD1,GRIA1,GRIK1,GRIK2,GRIN1,GRIN2A,GRIN2B,GRIN2D,GRM7,IGF1,ITPR3,KALRN,KCNAB1,KCND2,KCNMA1,KRAS,LRRK2,MAPT,MECP2,NGF,NKX2-1,NLGN1,NOS1,NPC1,NTF4,NTRK1,NTRK2,PAFAH1B1,PAK1,PBX3,PEX13,PPP3CB,PRKCA,PSEN1,PSEN2,RELN,SCN1A,SLC18A2,SLC1A3,SLC6A…
397	GO: Biological Process	GO:0008015	blood circulation	GeneOntologyBiologicalProcess_GO:0008015_blood circulation	10	ABAT,ACE,ACE2,ADORA1,ADORA2A,ADRB2,AGT,AGTR2,APOE,AR,ATP2B2,CASR,CHRNA7,DBH,DRD1,DRD2,DRD3,DRD5,GNAS,ITPR3,KCND2,KCNMA1,MECP2,NKX2-1,NOS1,PRKCA,PSEN2,SLC6A4,SOD1,TH
398	GO: Biological Process	GO:0014075	response to amine	GeneOntologyBiologicalProcess_GO:0014075_response to amine	10	ADORA2A,DBH,DRD1,DRD2,DRD3,DRD4,DRD5,GRIN1,GRIN2A,SLC18A2,SOD1,TH
399	GO: Biological Process	GO:0007169	transmembrane receptor protein tyrosine kinase signaling pathway	GeneOntologyBiologicalProcess_GO:0007169_transmembrane receptor protein tyrosine kinase signaling pathway	10	ADORA1,ADRB2,AGT,AGTR2,APP,AR,BDNF,BMX,CASP3,CDK5R1,CTNNB1,GRIN1,GRIN2B,IGF1,KALRN,KRAS,NGF,NTF4,NTRK1,NTRK2,PAK1,PRKCA,PSEN1,PSEN2,SNCA,TSC2
400	GO: Biological Process	GO:0055078	sodium ion homeostasis	GeneOntologyBiologicalProcess_GO:0055078_sodium ion homeostasis	10	ADORA1,ADORA2A,AGT,AGTR2,COMT,DRD2,DRD3,GNAS
401	GO: Biological Process	GO:0021795	cerebral cortex cell migration	GeneOntologyBiologicalProcess_GO:0021795_cerebral cortex cell migration	10	CDK5,CDK5R1,CTNNB1,NKX2-1,PAFAH1B1,PEX13,PSEN1,RELN
402	GO: Biological Process	GO:0071495	cellular response to endogenous stimulus	GeneOntologyBiologicalProcess_GO:0071495_cellular response to endogenous stimulus	10	AGT,AGTR2,APP,AR,BDNF,CTNNB1,DRD1,DRD5,GNAS,GRIN2A,IGF1,ITPR3,LRRK2,MT-ND3,NGF,NKX2-1,NOS1,NPC1,NTRK1,NTRK2,PAK1,PRKCA,SLC6A4,SNCA,SOD1,TH,TSC2,VLDLR
403	GO: Biological Process	GO:0007585	respiratory gaseous exchange	GeneOntologyBiologicalProcess_GO:0007585_respiratory gaseous exchange	10	ADORA1,ADRB2,CHRNA4,DACH1,GRIN1,MECP2,NLGN1,PBX3
404	GO: Biological Process	GO:0048489	synaptic vesicle transport	GeneOntologyBiologicalProcess_GO:0048489_synaptic vesicle transport	10	BRAF,CDK5,CTNNB1,FMR1,LRRK2,NLGN1,PSEN1,SNAP25,SNCA,SYN1,SYNJ1
405	GO: Biological Process	GO:0001934	positive regulation of protein phosphorylation	GeneOntologyBiologicalProcess_GO:0001934_positive regulation of protein phosphorylation	10	ACE,ADORA1,ADRB2,AGT,AR,BCL2,BDNF,BRAF,CDK5,CDK5R1,CHRNA7,CTNNB1,DRD2,DRD4,FMR1,GNAS,IGF1,KRAS,LRRK2,NGF,NTRK1,NTRK2,PAK1,PRKCA,PSEN1,RELN,SNCA,SOD1,VLDLR,WWC1
406	GO: Biological Process	GO:0060047	heart contraction	GeneOntologyBiologicalProcess_GO:0060047_heart contraction	10	ACE,ACE2,ADORA1,ADRB2,AGT,AGTR2,ATP2B2,CHRNA7,DRD2,ITPR3,KCND2,NOS1,PRKCA,PSEN2,SOD1,TH
407	GO: Biological Process	GO:0007166	cell surface receptor signaling pathway	GeneOntologyBiologicalProcess_GO:0007166_cell surface receptor signaling pathway	10	ABAT,ADORA1,ADORA2A,ADRB2,AGT,AGTR2,APOE,APP,AR,BCL2,BDNF,BMX,CASP3,CDK5,CDK5R1,CHRNA4,CHRNA7,CTNNB1,DBH,DLG4,DRD2,DRD4,FMR1,GABRA2,GRIA1,GRIA3,GRIK1,GRIK2,GRIN1,GRIN2A,GRIN2B,GRIN2D,GRM7,IGF1,KALRN,KRAS,LRRK2,MECP2,NGF,NKX2-1,NLGN1,NTF4,NTRK1,NTRK2,PAFAH1B1,PAK1,PPP3CB,PRKCA,PSEN1,PSEN2,RELN,SNCA,TSC2,VLDLR
408	GO: Biological Process	GO:0018108	peptidyl-tyrosine phosphorylation	GeneOntologyBiologicalProcess_GO:0018108_peptidyl-tyrosine phosphorylation	10	ACE,ADORA1,AGT,APP,BMX,DYRK1A,IGF1,NTRK1,NTRK2,PRKCA,PSEN1,PSEN2,RELN
409	GO: Biological Process	GO:1903649	regulation of cytoplasmic transport	GeneOntologyBiologicalProcess_GO:1903649_regulation of cytoplasmic transport	10	AGTR2,BCL2,BRAF,CDK5,DRD1,FMR1,IGF1,LRRK2,NGF,NLGN1,NOS1,PPP3CB,SNCA,SYN1,SYNJ1
410	GO: Biological Process	GO:0051656	establishment of organelle localization	GeneOntologyBiologicalProcess_GO:0051656_establishment of organelle localization	10	BRAF,CDK5,CTNNB1,FMR1,GRIA1,LRRK2,MAPT,NLGN1,PAFAH1B1,PSEN1,SNAP25,SNCA,SYN1,SYNJ1
411	GO: Biological Process	GO:0030182	neuron differentiation	GeneOntologyBiologicalProcess_GO:0030182_neuron differentiation	10	ADORA2A,APOE,APP,ATP2B2,BCL2,BDNF,BRAF,CASP3,CDK5,CDK5R1,CHAT,CTNNB1,DLG4,DRD1,DRD2,FMR1,GRIN1,IL1RAPL1,KALRN,KCNMA1,KRAS,LRRK2,MAPT,MECP2,NGB,NGF,NKX2-1,NLGN1,NTF4,NTRK1,NTRK2,PAFAH1B1,PAK1,PBX3,PPP3CB,PRKCA,PSEN1,RELN,SLC1A3,SLC6A4,SNAP25,SOD1,TH,VLDLR
412	GO: Biological Process	GO:0035094	response to nicotine	GeneOntologyBiologicalProcess_GO:0035094_response to nicotine	10	ABAT,BCL2,CASP3,CHRNA4,CHRNA7,DRD1,DRD2,IGF1,NOS1,NTRK1,SLC6A3,TH
413	GO: Biological Process	GO:0097480	establishment of synaptic vesicle localization	GeneOntologyBiologicalProcess_GO:0097480_establishment of synaptic vesicle localization	10	BRAF,CDK5,CTNNB1,FMR1,LRRK2,NLGN1,PSEN1,SNAP25,SNCA,SYN1,SYNJ1
414	GO: Biological Process	GO:0007167	enzyme linked receptor protein signaling pathway	GeneOntologyBiologicalProcess_GO:0007167_enzyme linked receptor protein signaling pathway	10	ADORA1,ADRB2,AGT,AGTR2,APP,AR,BDNF,BMX,CASP3,CDK5R1,CTNNB1,GRIN1,GRIN2B,IGF1,KALRN,KRAS,NGF,NKX2-1,NTF4,NTRK1,NTRK2,PAK1,PRKCA,PSEN1,PSEN2,SNCA,TSC2
415	GO: Biological Process	GO:1901700	response to oxygen-containing compound	GeneOntologyBiologicalProcess_GO:1901700_response to oxygen-containing compound	10	ABAT,ACE,ADH1C,ADRB2,AGT,AGTR2,APOE,APP,BCL2,BRAF,CASP3,CDK5,CDK5R1,CHAT,CHRNA7,COMT,CTNNB1,DBH,DLG4,DRD1,DRD2,DRD3,DRD4,DRD5,GNAS,GRIN1,GRIN2A,GRIN2B,IGF1,ITPR3,KALRN,KCNMA1,LRRK2,MECP2,MT-ND1,NGB,NKX2-1,NOS1,NTRK1,NTRK2,PAK1,PPP3CB,PRKCA,SLC18A2,SLC1A3,SLC6A3,SLC6A4,SNCA,SOD1,SRR,SYNJ1,TH,TSC2,TYR,VLDLR
417	GO: Biological Process	GO:0003081	regulation of systemic arterial blood pressure by renin-angiotensin	GeneOntologyBiologicalProcess_GO:0003081_regulation of systemic arterial blood pressure by renin-angiotensin	10	ACE,ACE2,AGT,AGTR2,DRD3,NKX2-1
418	GO: Biological Process	GO:0045666	positive regulation of neuron differentiation	GeneOntologyBiologicalProcess_GO:0045666_positive regulation of neuron differentiation	10	APOE,BCL2,BDNF,BRAF,FMR1,IL1RAPL1,KALRN,MAPT,NGF,NLGN1,NTRK1,NTRK2,PAFAH1B1,PSEN1,RELN,VLDLR
419	GO: Biological Process	GO:0050801	ion homeostasis	GeneOntologyBiologicalProcess_GO:0050801_ion homeostasis	10	ADORA1,ADORA2A,AGT,AGTR2,APOE,APP,ATP2B2,BCL2,CASR,CHRNA7,COMT,DLG4,DRD1,DRD2,DRD3,DRD4,DRD5,GNAS,GRIK2,GRIN1,ITPR3,KCNMA1,LRRK2,NGF,NOS1,PRKCA,PSEN1,PSEN2,SNCA,SOD1
420	GO: Biological Process	GO:1990267	response to transition metal nanoparticle	GeneOntologyBiologicalProcess_GO:1990267_response to transition metal nanoparticle	10	ABAT,BCL2,DRD2,GRIN1,GRIN2A,LRRK2,SLC18A2,SLC6A3,SNCA,SOD1,TH
421	GO: Biological Process	GO:0032270	positive regulation of cellular protein metabolic process	GeneOntologyBiologicalProcess_GO:0032270_positive regulation of cellular protein metabolic process	10	ACE,ADORA1,ADRB2,AGT,AGTR2,APOE,APP,AR,BCL2,BDNF,BRAF,CASP3,CDK5,CDK5R1,CHRNA7,CTNNB1,DRD2,DRD4,DYRK1A,FMR1,GNAS,IGF1,KRAS,LRRK2,NGF,NOS1,NTRK1,NTRK2,PAK1,PRKCA,PSEN1,PSEN2,RELN,SNCA,SOD1,VLDLR,WWC1
422	GO: Biological Process	GO:1903596	regulation of gap junction assembly	GeneOntologyBiologicalProcess_GO:1903596_regulation of gap junction assembly	10	ACE,ACE2,AGT
423	GO: Biological Process	GO:0001659	temperature homeostasis	GeneOntologyBiologicalProcess_GO:0001659_temperature homeostasis	10	ABAT,ADORA1,ADRB2,DBH,DRD1,DRD2
424	GO: Biological Process	GO:0006874	cellular calcium ion homeostasis	GeneOntologyBiologicalProcess_GO:0006874_cellular calcium ion homeostasis	10	AGT,APOE,APP,ATP2B2,BCL2,CASR,CHRNA7,DLG4,DRD1,DRD2,DRD3,DRD4,DRD5,GRIK2,GRIN1,ITPR3,NGF,NOS1,PRKCA,PSEN1,PSEN2,SNCA
426	GO: Biological Process	GO:0009260	ribonucleotide biosynthetic process	GeneOntologyBiologicalProcess_GO:0009260_ribonucleotide biosynthetic process	10	ADORA2A,ADRB2,APOE,DRD1,DRD2,DRD3,DRD4,DRD5,GNAS,GRM7,NOS1,PRKCA
427	GO: Biological Process	GO:0048666	neuron development	GeneOntologyBiologicalProcess_GO:0048666_neuron development	10	ADORA2A,APOE,APP,ATP2B2,BCL2,BDNF,BRAF,CDK5,CDK5R1,CHAT,DLG4,DRD1,DRD2,FMR1,GRIN1,IL1RAPL1,KALRN,KRAS,LRRK2,MAPT,MECP2,NGB,NGF,NKX2-1,NLGN1,NTF4,NTRK1,NTRK2,PAFAH1B1,PAK1,PBX3,PPP3CB,PRKCA,PSEN1,RELN,SLC1A3,SNAP25,SOD1,TH,VLDLR
428	GO: Biological Process	GO:0060079	excitatory postsynaptic potential	GeneOntologyBiologicalProcess_GO:0060079_excitatory postsynaptic potential	10	ADORA1,ADORA2A,ADRB2,BDNF,CDK5,DLG4,DRD4,GRIK1,GRIK2,GRIN1,GRIN2A,GRIN2B,GRIN2D,LRRK2,MECP2,NLGN1,RELN,SNCA
429	GO: Biological Process	GO:0051931	regulation of sensory perception	GeneOntologyBiologicalProcess_GO:0051931_regulation of sensory perception	10	ADORA1,ADRB2,COMT,GRIN2A,GRIN2D,NOS1
430	GO: Biological Process	GO:0010721	negative regulation of cell development	GeneOntologyBiologicalProcess_GO:0010721_negative regulation of cell development	10	APOE,APP,BCL2,BDNF,CDK5,CDK5R1,CTNNB1,DRD3,IGF1,MECP2,NKX2-1,NLGN1,PAFAH1B1,PSEN1,SLC6A4
431	GO: Biological Process	GO:0070887	cellular response to chemical stimulus	GeneOntologyBiologicalProcess_GO:0070887_cellular response to chemical stimulus	10	ADRB2,AGT,AGTR2,APP,AR,BCL2,BDNF,BRAF,CASP3,CDK5R1,CTNNB1,DRD1,DRD5,FMR1,GNAS,GRIN1,GRIN2A,IGF1,ITPR3,KCND2,KRAS,LRRK2,MAPT,MT-ND3,NGB,NGF,NKX2-1,NOS1,NPC1,NTRK1,NTRK2,PAFAH1B1,PAK1,PPP3CB,PRKCA,SLC18A2,SLC6A4,SNCA,SOD1,TH,TPH2,TSC2,VLDLR
432	GO: Biological Process	GO:0016477	cell migration	GeneOntologyBiologicalProcess_GO:0016477_cell migration	10	ACE,ADORA1,AGT,AGTR2,APOE,BCL2,BRAF,CDK5,CDK5R1,CTNNB1,DACH1,DBH,DRD1,DRD2,DRD5,IGF1,KRAS,LRRK2,MAPT,NKX2-1,NTRK2,PAFAH1B1,PAK1,PEX13,PRKCA,PSEN1,RELN,WWC1
433	GO: Biological Process	GO:0051648	vesicle localization	GeneOntologyBiologicalProcess_GO:0051648_vesicle localization	10	BRAF,CDK5,CTNNB1,FMR1,GRIA1,LRRK2,NLGN1,PAFAH1B1,PSEN1,SNAP25,SNCA,SYN1,SYNJ1
434	GO: Biological Process	GO:0010770	positive regulation of cell morphogenesis involved in differentiation	GeneOntologyBiologicalProcess_GO:0010770_positive regulation of cell morphogenesis involved in differentiation	10	APOE,BDNF,BRAF,CTNNB1,IL1RAPL1,KALRN,MAPT,NGF,NTRK2,PAFAH1B1,RELN
435	GO: Biological Process	GO:0051094	positive regulation of developmental process	GeneOntologyBiologicalProcess_GO:0051094_positive regulation of developmental process	10	ACE,ADRB2,AGT,AGTR2,APOE,AR,BCL2,BDNF,BRAF,CHRNA7,CTNNB1,DRD2,FMR1,GNAS,IGF1,IL1RAPL1,KALRN,KRAS,MAPT,MECP2,NGF,NLGN1,NTRK1,NTRK2,PAFAH1B1,PRKCA,PSEN1,RELN,SLC6A3,SYNJ1,VLDLR
436	GO: Biological Process	GO:0003013	circulatory system process	GeneOntologyBiologicalProcess_GO:0003013_circulatory system process	10	ABAT,ACE,ACE2,ADORA1,ADORA2A,ADRB2,AGT,AGTR2,APOE,AR,ATP2B2,CASR,CHRNA7,DBH,DRD1,DRD2,DRD3,DRD5,GNAS,ITPR3,KCND2,KCNMA1,MECP2,NKX2-1,NOS1,PRKCA,PSEN2,SLC6A4,SOD1,TH
437	GO: Biological Process	GO:0032409	regulation of transporter activity	GeneOntologyBiologicalProcess_GO:0032409_regulation of transporter activity	10	AGT,BCL2,CHRNA4,DLG4,DRD2,DRD3,DRD4,FMR1,KCNAB1,NLGN1,NOS1,RELN,SNCA
438	GO: Biological Process	GO:0046717	acid secretion	GeneOntologyBiologicalProcess_GO:0046717_acid secretion	10	ABAT,ACE,ADORA1,ADORA2A,AGTR2,BDNF,DRD2,DRD3,DRD4,GRIK1,GRIN2B,GRM7,NTRK2,PAK1,SLC1A3,SNAP25,SNCA
439	GO: Biological Process	GO:0015711	organic anion transport	GeneOntologyBiologicalProcess_GO:0015711_organic anion transport	10	ABAT,ACE,ACE2,ADORA1,ADORA2A,AGT,AGTR2,APOE,BDNF,DRD2,DRD3,DRD4,GRIK1,GRIN2B,GRM7,NTRK2,PAK1,PSEN1,SLC1A3,SNAP25,SNCA
441	GO: Biological Process	GO:0032412	regulation of ion transmembrane transporter activity	GeneOntologyBiologicalProcess_GO:0032412_regulation of ion transmembrane transporter activity	10	AGT,CHRNA4,DLG4,DRD2,DRD3,DRD4,FMR1,KCNAB1,NLGN1,NOS1,RELN
442	GO: Biological Process	GO:0016310	phosphorylation	GeneOntologyBiologicalProcess_GO:0016310_phosphorylation	10	ACE,ACE2,ADORA1,ADORA2A,ADRB2,AGT,ANKK1,APOE,APP,AR,BCL2,BDNF,BMX,BRAF,CASP3,CASR,CDK5,CDK5R1,CHRNA7,CTNNB1,DLG4,DRD1,DRD2,DRD4,DRD5,DYRK1A,FMR1,GNAS,GRIK2,GRIN1,GRIN2A,GRIN2B,GRIN2D,IGF1,KALRN,KRAS,LRRK2,MECP2,NGF,NOS1,NTRK1,NTRK2,PAFAH1B1,PAK1,PPP3CB,PRKCA,PSEN1,PSEN2,RELN,SNCA,SOD1,TSC2,VLDLR,WWC1
443	GO: Biological Process	GO:0048538	thymus development	GeneOntologyBiologicalProcess_GO:0048538_thymus development	10	BCL2,BRAF,CTNNB1,PSEN1,PSEN2,SOD1,TYR
444	GO: Biological Process	GO:0010646	regulation of cell communication	GeneOntologyBiologicalProcess_GO:0010646_regulation of cell communication	10	ABAT,ACE2,ADORA1,ADORA2A,ADRB2,AGT,AGTR2,APOE,APP,AR,ATP2B2,BCL2,BDNF,BRAF,CASP3,CASR,CDK5,CDK5R1,CHAT,CHRNA4,CHRNA7,CTNNB1,DBH,DLG4,DRD1,DRD2,DRD3,DRD4,DRD5,DYRK1A,FMR1,GNAS,GRIA1,GRIK1,GRIK2,GRIN1,GRIN2A,GRIN2B,GRM7,IGF1,ITPR3,KALRN,KRAS,LRRK2,MAPT,MECP2,NGF,NKX2-1,NLGN1,NOS1,NPC1,NTRK1,NTRK2,PAFAH1B1,PAK1,PPP3CB,PRKCA,PSEN1,PSEN2,RELN,SLC1A3,SLC6A4,SNAP25,SNCA,SOD1,SYN1,SYNJ1,TSC2,WWC1
445	GO: Biological Process	GO:0018958	phenol-containing compound metabolic process	GeneOntologyBiologicalProcess_GO:0018958_phenol-containing compound metabolic process	10	ABAT,AGTR2,ATP2B2,BCL2,COMT,DBH,DRD1,DRD2,DRD3,DRD4,GRIN2A,HDC,MAOA,RELN,SLC6A3,SNCA,TH,TPH2,TYR
446	GO: Biological Process	GO:0048545	response to steroid hormone	GeneOntologyBiologicalProcess_GO:0048545_response to steroid hormone	10	ADH1C,ADRB2,AGTR2,AR,BCL2,BDNF,CASP3,CTNNB1,DRD1,DRD4,IGF1,KCNMA1,KRAS,MECP2,MT-ND3,NOS1,NPC1,NTRK2,PAK1,PRKCA,SLC18A2,SLC6A4,TH,TPH2
447	GO: Biological Process	GO:0010975	regulation of neuron projection development	GeneOntologyBiologicalProcess_GO:0010975_regulation of neuron projection development	10	APOE,BDNF,BRAF,CDK5,CDK5R1,FMR1,GRIN1,IL1RAPL1,KALRN,LRRK2,MAPT,NGF,NLGN1,NTRK1,NTRK2,PAFAH1B1,PSEN1,RELN,SNAP25,VLDLR
448	GO: Biological Process	GO:0018105	peptidyl-serine phosphorylation	GeneOntologyBiologicalProcess_GO:0018105_peptidyl-serine phosphorylation	10	AGT,BCL2,BDNF,BRAF,CDK5,CDK5R1,DYRK1A,LRRK2,NOS1,NTRK2,PAK1,PRKCA,SNCA
449	GO: Biological Process	GO:0010648	negative regulation of cell communication	GeneOntologyBiologicalProcess_GO:0010648_negative regulation of cell communication	10	ACE2,ADORA1,ADRB2,AGT,AGTR2,APOE,AR,BCL2,BDNF,BRAF,CTNNB1,DRD1,DRD2,DRD3,DRD5,DYRK1A,FMR1,GRIA1,GRIK1,GRIK2,IGF1,LRRK2,MAPT,NKX2-1,NOS1,NPC1,PAFAH1B1,PRKCA,PSEN1,PSEN2,SLC6A4,SNCA,TSC2,WWC1
450	GO: Biological Process	GO:0007267	cell-cell signaling	GeneOntologyBiologicalProcess_GO:0007267_cell-cell signaling	10	ABAT,ADORA1,ADORA2A,ADRB2,AGT,AGTR2,APOE,AR,ATP2B2,BDNF,BRAF,CASR,CDK5,CDK5R1,CHAT,CHRNA4,CHRNA7,CTNNB1,DBH,DLG3,DLG4,DRD1,DRD2,DRD3,DRD4,DRD5,FMR1,GABRA2,GAD1,GNAS,GRIA1,GRIA3,GRIK1,GRIK2,GRIN1,GRIN2A,GRIN2B,GRIN2D,GRM7,ITPR3,KALRN,KCND2,KCNMA1,KRAS,LRRK2,MAPT,MECP2,NGF,NLGN1,NOS1,NTF4,NTRK1,NTRK2,PAFAH1B1,PAK1,PPP3CB,PRKCA,PSEN1,PSEN2,RELN,SLC18A2,SLC1A3,SLC6A3,SLC6A4,SNAP25,SNCA,SYN1,SYNJ1,TH
451	GO: Biological Process	GO:0009117	nucleotide metabolic process	GeneOntologyBiologicalProcess_GO:0009117_nucleotide metabolic process	10	ADORA2A,ADRB2,APOE,ATP2B2,BDNF,DLG3,DLG4,DRD1,DRD2,DRD3,DRD4,DRD5,GNAS,GRM7,IGF1,LRRK2,MECP2,NOS1,PRKCA,SNCA
452	GO: Biological Process	GO:0046390	ribose phosphate biosynthetic process	GeneOntologyBiologicalProcess_GO:0046390_ribose phosphate biosynthetic process	10	ADORA2A,ADRB2,APOE,DRD1,DRD2,DRD3,DRD4,DRD5,GNAS,GRM7,NOS1,PRKCA
453	GO: Biological Process	GO:0007187	G-protein coupled receptor signaling pathway, coupled to cyclic nucleotide second messenger	GeneOntologyBiologicalProcess_GO:0007187_G-protein coupled receptor signaling pathway, coupled to cyclic nucleotide second messenger	10	ADORA1,ADORA2A,ADRB2,AGT,AGTR2,CASR,DRD1,DRD2,DRD3,DRD4,DRD5,GNAS,GRM7
454	GO: Biological Process	GO:0051955	regulation of amino acid transport	GeneOntologyBiologicalProcess_GO:0051955_regulation of amino acid transport	10	ABAT,ADORA1,ADORA2A,AGT,GRIK1,GRIN2B,GRM7,SNCA
455	GO: Biological Process	GO:0032410	negative regulation of transporter activity	GeneOntologyBiologicalProcess_GO:0032410_negative regulation of transporter activity	10	AGT,DRD2,DRD3,DRD4,FMR1,KCNAB1,SNCA
456	GO: Biological Process	GO:0006875	cellular metal ion homeostasis	GeneOntologyBiologicalProcess_GO:0006875_cellular metal ion homeostasis	10	AGT,AGTR2,APOE,APP,ATP2B2,BCL2,CASR,CHRNA7,DLG4,DRD1,DRD2,DRD3,DRD4,DRD5,GRIK2,GRIN1,ITPR3,KCNMA1,NGF,NOS1,PRKCA,PSEN1,PSEN2,SNCA,SOD1
457	GO: Biological Process	GO:0051130	positive regulation of cellular component organization	GeneOntologyBiologicalProcess_GO:0051130_positive regulation of cellular component organization	10	ACE2,ADRB2,AGT,APOE,AR,BCL2,BDNF,BRAF,CDK5,CDK5R1,CTNNB1,DRD2,DRD3,FMR1,IGF1,IL1RAPL1,KALRN,MAPT,MECP2,NGF,NLGN1,NOS1,NTRK1,NTRK2,PAFAH1B1,PAK1,PRKCA,PSEN1,RELN,SNCA,SYNJ1,VLDLR
458	GO: Biological Process	GO:0070509	calcium ion import	GeneOntologyBiologicalProcess_GO:0070509_calcium ion import	10	ACE,CASR,CDK5,CTNNB1,DRD1,DRD2,ITPR3,NGF,NOS1,SNCA
459	GO: Biological Process	GO:0042745	circadian sleep/wake cycle	GeneOntologyBiologicalProcess_GO:0042745_circadian sleep/wake cycle	10	ADORA1,ADORA2A,DRD1,DRD2,DRD3,NLGN1,TH
460	GO: Biological Process	GO:0051048	negative regulation of secretion	GeneOntologyBiologicalProcess_GO:0051048_negative regulation of secretion	10	ABAT,ADORA1,AGTR2,BRAF,COMT,DRD2,DRD3,DRD4,FMR1,GNAS,GRM7,IL1RAPL1,NOS1,SNCA
461	GO: Biological Process	GO:0042063	gliogenesis	GeneOntologyBiologicalProcess_GO:0042063_gliogenesis	10	ADORA2A,AGT,CDK5,CDK5R1,CTNNB1,DRD1,DRD3,IGF1,KRAS,MECP2,NKX2-1,NTRK2,PAFAH1B1,RELN,SOD1,SYNJ1
463	GO: Biological Process	GO:0044057	regulation of system process	GeneOntologyBiologicalProcess_GO:0044057_regulation of system process	10	ABAT,ACE,ACE2,ADORA1,ADORA2A,ADRB2,AGT,AGTR2,ATP2B2,CASR,CHRNA7,COMT,DBH,DRD1,DRD2,DRD3,FMR1,GNAS,GRIN2A,GRIN2D,IGF1,ITPR3,KCND2,KCNMA1,MECP2,NLGN1,NOS1,PBX3,PRKCA,SOD1,TH
464	GO: Biological Process	GO:1901617	organic hydroxy compound biosynthetic process	GeneOntologyBiologicalProcess_GO:1901617_organic hydroxy compound biosynthetic process	10	AGTR2,APOE,CHAT,DBH,HDC,SLC6A3,SNCA,SOD1,TH,TPH2,TYR
466	GO: Biological Process	GO:0048512	circadian behavior	GeneOntologyBiologicalProcess_GO:0048512_circadian behavior	10	ADORA1,ADORA2A,DRD1,DRD2,DRD3,KCND2,KCNMA1,NLGN1,TH
467	GO: Biological Process	GO:0061564	axon development	GeneOntologyBiologicalProcess_GO:0061564_axon development	10	APOE,APP,BCL2,BDNF,BRAF,CDK5,CDK5R1,DRD2,GRIN1,KALRN,KRAS,MAPT,NGF,NKX2-1,NTRK1,NTRK2,PAFAH1B1,PAK1,PPP3CB,PRKCA,PSEN1,RELN
468	GO: Biological Process	GO:0051705	multi-organism behavior	GeneOntologyBiologicalProcess_GO:0051705_multi-organism behavior	10	APP,AR,DACH1,DLG4,DRD1,DRD3,DRD4,DRD5,GAD1,GRIN1,GRIN2B,KALRN,KRAS,MECP2,PEX13,PPP3CB,SLC6A4,TH
469	GO: Biological Process	GO:0098662	inorganic cation transmembrane transport	GeneOntologyBiologicalProcess_GO:0098662_inorganic cation transmembrane transport	10	AGT,ATP2B2,DRD1,DRD2,DRD3,DRD4,FMR1,GRIN1,GRIN2A,GRM7,IL1RAPL1,ITPR3,KCNAB1,KCND2,KCNMA1,NGF,NOS1,PSEN1,SCN1A,SLC6A3,SNAP25,SNCA
470	GO: Biological Process	GO:0021801	cerebral cortex radial glia guided migration	GeneOntologyBiologicalProcess_GO:0021801_cerebral cortex radial glia guided migration	10	CDK5,CDK5R1,CTNNB1,PAFAH1B1,RELN
471	GO: Biological Process	GO:0031280	negative regulation of cyclase activity	GeneOntologyBiologicalProcess_GO:0031280_negative regulation of cyclase activity	10	DRD2,DRD3,DRD4,GRM7,PRKCA
473	GO: Biological Process	GO:0001919	regulation of receptor recycling	GeneOntologyBiologicalProcess_GO:0001919_regulation of receptor recycling	10	GRIA1,GRIA3,PSEN1,PSEN2,SNCA
474	GO: Biological Process	GO:0009056	catabolic process	GeneOntologyBiologicalProcess_GO:0009056_catabolic process	10	ABAT,ACE,ACE2,ADH1C,ADORA1,ADRB2,APOE,BACE1,BCL2,CASP3,CDK5,CDK5R1,COMT,CTNNB1,DBH,DRD1,FAAH,FMR1,GAD1,GRIN2A,HDC,IGF1,LRRK2,MAOA,MAPT,NOS1,NPC1,PAFAH1B1,PEX13,PSEN1,PSEN2,SLC1A3,SLC6A3,SNCA,SYNJ1,TSC2
475	GO: Biological Process	GO:0030814	regulation of cAMP metabolic process	GeneOntologyBiologicalProcess_GO:0030814_regulation of cAMP metabolic process	10	ADORA2A,ADRB2,DRD1,DRD2,DRD3,DRD4,DRD5,GNAS,GRM7,PRKCA
476	GO: Biological Process	GO:0048870	cell motility	GeneOntologyBiologicalProcess_GO:0048870_cell motility	10	ACE,ADORA1,AGT,AGTR2,APOE,BCL2,BRAF,CDK5,CDK5R1,CHRNA7,CTNNB1,DACH1,DBH,DRD1,DRD2,DRD5,IGF1,KRAS,LRRK2,MAPT,NKX2-1,NTRK2,PAFAH1B1,PAK1,PEX13,PRKCA,PSEN1,RELN,WWC1
477	GO: Biological Process	GO:0045937	positive regulation of phosphate metabolic process	GeneOntologyBiologicalProcess_GO:0045937_positive regulation of phosphate metabolic process	10	ACE,ADORA1,ADORA2A,ADRB2,AGT,AGTR2,APOE,AR,BCL2,BDNF,BRAF,CDK5,CDK5R1,CHRNA7,CTNNB1,DRD1,DRD2,DRD4,DRD5,FMR1,GNAS,IGF1,KRAS,LRRK2,NGF,NOS1,NTRK1,NTRK2,PAK1,PRKCA,PSEN1,RELN,SNCA,SOD1,VLDLR,WWC1
478	GO: Biological Process	GO:0060322	head development	GeneOntologyBiologicalProcess_GO:0060322_head development	10	ABAT,AGTR2,APP,ATP2B2,BCL2,BRAF,CASP3,CDK5,CDK5R1,CTNNB1,DRD1,DRD2,GRIN1,IGF1,KCNAB1,KRAS,LRRK2,MAPT,MECP2,NKX2-1,NTRK2,PAFAH1B1,PAK1,PEX13,PSEN1,PSEN2,RELN,SLC6A3,SLC6A4,SRR,TH,VLDLR
479	GO: Biological Process	GO:0045664	regulation of neuron differentiation	GeneOntologyBiologicalProcess_GO:0045664_regulation of neuron differentiation	10	APOE,APP,BCL2,BDNF,BRAF,CDK5,CDK5R1,FMR1,GRIN1,IL1RAPL1,KALRN,LRRK2,MAPT,NGF,NLGN1,NTF4,NTRK1,NTRK2,PAFAH1B1,PSEN1,RELN,SLC6A4,SNAP25,VLDLR
480	GO: Biological Process	GO:1902531	regulation of intracellular signal transduction	GeneOntologyBiologicalProcess_GO:1902531_regulation of intracellular signal transduction	10	ACE2,ADORA1,ADRB2,AGT,APOE,AR,BCL2,BRAF,CDK5,CDK5R1,CHRNA7,CTNNB1,DRD2,DRD3,DRD4,DYRK1A,GNAS,GRIK2,GRIN2B,IGF1,KALRN,KRAS,LRRK2,NGF,NLGN1,NOS1,NTRK1,NTRK2,PAFAH1B1,PAK1,PRKCA,PSEN1,RELN,SOD1,TSC2,WWC1
481	GO: Biological Process	GO:0022029	telencephalon cell migration	GeneOntologyBiologicalProcess_GO:0022029_telencephalon cell migration	10	CDK5,CDK5R1,CTNNB1,DRD1,DRD2,LRRK2,NKX2-1,PAFAH1B1,PEX13,PSEN1,RELN
482	GO: Biological Process	GO:0043405	regulation of MAP kinase activity	GeneOntologyBiologicalProcess_GO:0043405_regulation of MAP kinase activity	10	ADORA1,APOE,BRAF,CHRNA7,DRD4,IGF1,KRAS,LRRK2,NGF,NTRK1,PAK1,PRKCA,PSEN1,SOD1,TSC2
483	GO: Biological Process	GO:0071417	cellular response to organonitrogen compound	GeneOntologyBiologicalProcess_GO:0071417_cellular response to organonitrogen compound	10	AGT,AGTR2,APP,CTNNB1,DRD1,DRD5,GNAS,GRIN2A,IGF1,ITPR3,LRRK2,NOS1,NTRK1,NTRK2,PAK1,PRKCA,SLC6A4,SNCA,SOD1,TH,TSC2,VLDLR
484	GO: Biological Process	GO:0048523	negative regulation of cellular process	GeneOntologyBiologicalProcess_GO:0048523_negative regulation of cellular process	10	ABAT,ACE,ACE2,ADORA1,ADORA2A,ADRB2,AGT,AGTR2,APOE,APP,AR,BCL2,BDNF,BRAF,CASP3,CDK5,CDK5R1,COMT,CTNNB1,DACH1,DLG3,DLG4,DRD1,DRD2,DRD3,DRD4,DRD5,DYRK1A,FMR1,GRIA1,GRIK1,GRIK2,GRIN1,GRM7,IGF1,IL1RAPL1,ITPR3,KCNAB1,KRAS,LRRK2,MAPT,MECP2,NGB,NGF,NKX2-1,NLGN1,NOS1,NPC1,NTF4,NTRK1,NTRK2,PAFAH1B1,PAK1,PRKCA,PSEN1,PSEN2,SLC18A2,SLC6A4,SNCA,SOD1,TSC2,VLDLR,WWC1
485	GO: Biological Process	GO:0019693	ribose phosphate metabolic process	GeneOntologyBiologicalProcess_GO:0019693_ribose phosphate metabolic process	10	ADORA2A,ADRB2,APOE,ATP2B2,BDNF,DLG3,DLG4,DRD1,DRD2,DRD3,DRD4,DRD5,GNAS,GRM7,IGF1,LRRK2,MECP2,NOS1,PRKCA,SNCA
486	GO: Biological Process	GO:0052652	cyclic purine nucleotide metabolic process	GeneOntologyBiologicalProcess_GO:0052652_cyclic purine nucleotide metabolic process	10	ADORA2A,ADRB2,APOE,DRD1,DRD2,DRD3,DRD4,DRD5,GNAS,GRM7,NOS1,PRKCA
487	GO: Biological Process	GO:0042596	fear response	GeneOntologyBiologicalProcess_GO:0042596_fear response	10	BCL2,BDNF,DBH,DRD1,DRD4,GRIK2,GRIN2B,GRM7,KALRN,MECP2
488	GO: Biological Process	GO:0010720	positive regulation of cell development	GeneOntologyBiologicalProcess_GO:0010720_positive regulation of cell development	10	ACE,APOE,BCL2,BDNF,BRAF,CTNNB1,DRD2,FMR1,IL1RAPL1,KALRN,MAPT,NGF,NLGN1,NTRK1,NTRK2,PAFAH1B1,PSEN1,RELN,SYNJ1,VLDLR
489	GO: Biological Process	GO:0048731	system development	GeneOntologyBiologicalProcess_GO:0048731_system development	10	ABAT,ACE,ADORA1,ADORA2A,ADRB2,AGT,AGTR2,APOE,APP,AR,ATP2B2,BCL2,BDNF,BMX,BRAF,CASP3,CDK5,CDK5R1,CHAT,CHRNA7,CTNNB1,DLG3,DLG4,DRD1,DRD2,DRD3,DRD4,DYRK1A,FMR1,GNAS,GRIK1,GRIN1,GRIN2A,GRIN2B,IGF1,IL1RAPL1,KALRN,KCNAB1,KCNMA1,KRAS,LRRK2,MAPT,MECP2,NGB,NGF,NKX2-1,NLGN1,NOS1,NTF4,NTRK1,NTRK2,PAFAH1B1,PAK1,PBX3,PEX13,PPP3CB,PRKCA,PSEN1,PSEN2,RELN,SLC1A3,SLC6A3,SLC6A4,SNAP25,SOD1,SRR,SYNJ1,TH,TSC2,TYR,VL…
491	GO: Biological Process	GO:0043270	positive regulation of ion transport	GeneOntologyBiologicalProcess_GO:0043270_positive regulation of ion transport	10	ABAT,ADORA1,ADORA2A,ADRB2,AGT,APOE,ATP2B2,CASR,CHRNA4,DRD1,DRD2,DRD4,GNAS,GRIK1,GRIN2B,NOS1,RELN,SNCA
492	GO: Biological Process	GO:0006140	regulation of nucleotide metabolic process	GeneOntologyBiologicalProcess_GO:0006140_regulation of nucleotide metabolic process	10	ADORA2A,ADRB2,APOE,DRD1,DRD2,DRD3,DRD4,DRD5,GNAS,GRM7,IGF1,NOS1,PRKCA,SNCA
493	GO: Biological Process	GO:0007268	chemical synaptic transmission	GeneOntologyBiologicalProcess_GO:0007268_chemical synaptic transmission	10	ABAT,ADORA1,ADORA2A,ADRB2,AGT,APOE,ATP2B2,BDNF,BRAF,CDK5,CHAT,CHRNA4,CHRNA7,CTNNB1,DBH,DLG3,DLG4,DRD1,DRD2,DRD3,DRD4,DRD5,FMR1,GABRA2,GAD1,GRIA1,GRIA3,GRIK1,GRIK2,GRIN1,GRIN2A,GRIN2B,GRIN2D,GRM7,ITPR3,KALRN,KCND2,KCNMA1,KRAS,LRRK2,MAPT,MECP2,NGF,NLGN1,NOS1,NTRK1,NTRK2,PAFAH1B1,PAK1,PPP3CB,PSEN1,PSEN2,RELN,SLC18A2,SLC1A3,SLC6A3,SLC6A4,SNAP25,SNCA,SYN1,SYNJ1,TH
495	GO: Biological Process	GO:0010563	negative regulation of phosphorus metabolic process	GeneOntologyBiologicalProcess_GO:0010563_negative regulation of phosphorus metabolic process	10	ACE2,ADORA2A,APOE,CASP3,DLG3,DRD1,DRD2,DRD3,DRD4,DRD5,GRM7,IGF1,LRRK2,NOS1,PAFAH1B1,PRKCA,PSEN1,PSEN2,SNCA,TSC2
496	GO: Biological Process	GO:0009611	response to wounding	GeneOntologyBiologicalProcess_GO:0009611_response to wounding	10	ABAT,ACE,ACE2,ADORA1,ADORA2A,ADRB2,AGT,APOE,BCL2,BRAF,CASP3,CDK5,CHRNA7,DRD2,DRD5,GNAS,GRIN2A,IGF1,ITPR3,NTRK1,PAK1,PRKCA,SLC1A3,SOD1
497	GO: Biological Process	GO:0018212	peptidyl-tyrosine modification	GeneOntologyBiologicalProcess_GO:0018212_peptidyl-tyrosine modification	10	ACE,ADORA1,AGT,APP,BMX,DYRK1A,IGF1,NTRK1,NTRK2,PRKCA,PSEN1,PSEN2,RELN
498	GO: Biological Process	GO:0060996	dendritic spine development	GeneOntologyBiologicalProcess_GO:0060996_dendritic spine development	10	APOE,CDK5,CDK5R1,DLG4,FMR1,KALRN,LRRK2,NLGN1,PAFAH1B1,PAK1,PSEN1,RELN
499	GO: Biological Process	GO:0006915	apoptotic process	GeneOntologyBiologicalProcess_GO:0006915_apoptotic process	10	ACE,ADORA1,ADORA2A,ADRB2,AGT,AGTR2,APOE,APP,AR,BCL2,BDNF,BMX,BRAF,CASP3,CDK5,CDK5R1,CTNNB1,DBH,GRIK2,GRIN1,GRIN2A,IGF1,KALRN,KCNMA1,KRAS,LRRK2,MAPT,MECP2,NGB,NGF,NOS1,NTF4,NTRK1,NTRK2,PAK1,PRKCA,PSEN1,PSEN2,SNCA,SOD1
500	GO: Biological Process	GO:0035265	organ growth	GeneOntologyBiologicalProcess_GO:0035265_organ growth	10	AGT,AGTR2,AR,BCL2,CTNNB1,IGF1,SLC6A4,SOD1,WWC1
501	GO: Biological Process	GO:0001964	startle response	GeneOntologyBiologicalProcess_GO:0001964_startle response	10	ADORA2A,DRD1,DRD2,DRD3,GRIN1,GRIN2A,GRIN2B,GRIN2D,MECP2,SLC6A3
502	GO: Biological Process	GO:0022414	reproductive process	GeneOntologyBiologicalProcess_GO:0022414_reproductive process	10	ABAT,ACE,ADRB2,AGT,APP,AR,BCL2,CHAT,CHRNA7,COMT,CTNNB1,DACH1,DBH,DRD1,DRD4,DRD5,GNAS,GRIN1,IGF1,MAPT,NKX2-1,NOS1,NTRK1,PAFAH1B1,SLC6A4,SOD1,TH
504	GO: Biological Process	GO:0046883	regulation of hormone secretion	GeneOntologyBiologicalProcess_GO:0046883_regulation of hormone secretion	10	ABAT,ADORA1,AGT,AGTR2,CASR,DRD2,GNAS,ITPR3,NOS1,PPP3CB,PRKCA,SNAP25
505	GO: Biological Process	GO:0001764	neuron migration	GeneOntologyBiologicalProcess_GO:0001764_neuron migration	10	CDK5,CDK5R1,CTNNB1,DRD1,DRD2,MAPT,NKX2-1,NTRK2,PAFAH1B1,PEX13,PSEN1,RELN
506	GO: Biological Process	GO:0031667	response to nutrient levels	GeneOntologyBiologicalProcess_GO:0031667_response to nutrient levels	10	ADRB2,APOE,BCL2,CASP3,CDK5,CDK5R1,CHAT,CHRNA7,COMT,DRD1,IGF1,LRRK2,MAPT,NOS1,NPC1,NTRK1,SLC18A2,SLC6A4,SOD1,TH,TPH2,TSC2,TYR,VLDLR
507	GO: Biological Process	GO:0048149	behavioral response to ethanol	GeneOntologyBiologicalProcess_GO:0048149_behavioral response to ethanol	10	ADH1C,CHRNA7,DBH,DRD2,DRD4
508	GO: Biological Process	GO:0050974	detection of mechanical stimulus involved in sensory perception	GeneOntologyBiologicalProcess_GO:0050974_detection of mechanical stimulus involved in sensory perception	10	ATP2B2,GRIN2A,GRIN2B,GRIN2D,IGF1,NTRK1
509	GO: Biological Process	GO:0098771	inorganic ion homeostasis	GeneOntologyBiologicalProcess_GO:0098771_inorganic ion homeostasis	10	ADORA1,ADORA2A,AGT,AGTR2,APOE,APP,ATP2B2,BCL2,CASR,CHRNA7,COMT,DLG4,DRD1,DRD2,DRD3,DRD4,DRD5,GNAS,GRIK2,GRIN1,ITPR3,KCNMA1,LRRK2,NGF,NOS1,PRKCA,PSEN1,PSEN2,SNCA,SOD1
510	GO: Biological Process	GO:0072507	divalent inorganic cation homeostasis	GeneOntologyBiologicalProcess_GO:0072507_divalent inorganic cation homeostasis	10	AGT,APOE,APP,ATP2B2,BCL2,CASR,CHRNA7,DLG4,DRD1,DRD2,DRD3,DRD4,DRD5,GNAS,GRIK2,GRIN1,ITPR3,NGF,NOS1,PRKCA,PSEN1,PSEN2,SNCA
511	GO: Biological Process	GO:0042310	vasoconstriction	GeneOntologyBiologicalProcess_GO:0042310_vasoconstriction	10	ACE,ACE2,AGT,CASR,DBH,DRD1,DRD5,NOS1,SLC6A4
512	GO: Biological Process	GO:0030073	insulin secretion	GeneOntologyBiologicalProcess_GO:0030073_insulin secretion	10	ABAT,CASR,DRD2,GNAS,ITPR3,NOS1,PPP3CB,PRKCA,SLC18A2,SNAP25
513	GO: Biological Process	GO:0035812	renal sodium excretion	GeneOntologyBiologicalProcess_GO:0035812_renal sodium excretion	10	ADORA1,ADORA2A,AGT,AGTR2,COMT,DRD2,DRD3,GNAS
514	GO: Biological Process	GO:0050802	circadian sleep/wake cycle, sleep	GeneOntologyBiologicalProcess_GO:0050802_circadian sleep/wake cycle, sleep	10	ADORA1,ADORA2A,DRD1,DRD2,DRD3
515	GO: Biological Process	GO:0042592	homeostatic process	GeneOntologyBiologicalProcess_GO:0042592_homeostatic process	10	ABAT,ADORA1,ADORA2A,ADRB2,AGT,AGTR2,APOE,APP,ATP2B2,BCL2,CASP3,CASR,CHRNA7,COMT,CTNNB1,DBH,DLG4,DRD1,DRD2,DRD3,DRD4,DRD5,GNAS,GRIK2,GRIN1,IGF1,ITPR3,KCNMA1,KRAS,LRRK2,NGF,NOS1,NPC1,PPP3CB,PRKCA,PSEN1,PSEN2,SLC18A2,SNCA,SOD1,TH
516	GO: Biological Process	GO:0044092	negative regulation of molecular function	GeneOntologyBiologicalProcess_GO:0044092_negative regulation of molecular function	10	ACE,ADORA2A,ADRB2,AGT,APOE,APP,CASP3,DLG3,DRD1,DRD2,DRD3,DRD4,DRD5,FMR1,GRM7,IGF1,KCNAB1,LRRK2,NGF,NOS1,PRKCA,PSEN1,PSEN2,SNCA,TSC2
517	GO: Biological Process	GO:0098801	regulation of renal system process	GeneOntologyBiologicalProcess_GO:0098801_regulation of renal system process	10	ADORA1,ADORA2A,AGT,AGTR2,COMT,DRD2,DRD3,GNAS
518	GO: Biological Process	GO:0051953	negative regulation of amine transport	GeneOntologyBiologicalProcess_GO:0051953_negative regulation of amine transport	10	ABAT,ADORA1,AGTR2,DRD2,GRM7,SNCA
519	GO: Biological Process	GO:0009150	purine ribonucleotide metabolic process	GeneOntologyBiologicalProcess_GO:0009150_purine ribonucleotide metabolic process	10	ADORA2A,ADRB2,APOE,ATP2B2,BDNF,DLG3,DLG4,DRD1,DRD2,DRD3,DRD4,DRD5,GNAS,GRM7,IGF1,LRRK2,MECP2,NOS1,PRKCA,SNCA
520	GO: Biological Process	GO:0007626	locomotory behavior	GeneOntologyBiologicalProcess_GO:0007626_locomotory behavior	10	ABAT,ADORA2A,APP,ATP2B2,CHAT,CHRNA4,DBH,DLG4,DRD1,DRD2,DRD3,DRD4,GAD1,GRIN1,GRIN2A,GRIN2D,KCND2,KCNMA1,LRRK2,MAPT,MECP2,NGF,NKX2-1,NPC1,NTF4,PAFAH1B1,PBX3,PEX13,PPP3CB,RELN,SCN1A,SLC18A2,SLC6A3,SNAP25,SNCA,SOD1,TH
521	GO: Biological Process	GO:0006163	purine nucleotide metabolic process	GeneOntologyBiologicalProcess_GO:0006163_purine nucleotide metabolic process	10	ADORA2A,ADRB2,APOE,ATP2B2,BDNF,DLG3,DLG4,DRD1,DRD2,DRD3,DRD4,DRD5,GNAS,GRM7,IGF1,LRRK2,MECP2,NOS1,PRKCA,SNCA
522	GO: Biological Process	GO:0060998	regulation of dendritic spine development	GeneOntologyBiologicalProcess_GO:0060998_regulation of dendritic spine development	10	APOE,CDK5,CDK5R1,FMR1,KALRN,LRRK2,NLGN1,PAFAH1B1,PSEN1,RELN
523	GO: Biological Process	GO:0048675	axon extension	GeneOntologyBiologicalProcess_GO:0048675_axon extension	10	APOE,BDNF,CDK5,CDK5R1,MAPT,NGF,PAFAH1B1,PPP3CB
524	GO: Biological Process	GO:0051247	positive regulation of protein metabolic process	GeneOntologyBiologicalProcess_GO:0051247_positive regulation of protein metabolic process	10	ACE,ADORA1,ADRB2,AGT,AGTR2,APOE,APP,AR,BCL2,BDNF,BRAF,CASP3,CDK5,CDK5R1,CHRNA7,CTNNB1,DRD2,DRD4,DYRK1A,FMR1,GNAS,IGF1,KRAS,LRRK2,NGF,NOS1,NTRK1,NTRK2,PAK1,PRKCA,PSEN1,PSEN2,RELN,SNCA,SOD1,VLDLR,WWC1
525	GO: Biological Process	GO:0051930	regulation of sensory perception of pain	GeneOntologyBiologicalProcess_GO:0051930_regulation of sensory perception of pain	10	ADORA1,ADRB2,COMT,GRIN2A,GRIN2D,NOS1
526	GO: Biological Process	GO:0022898	regulation of transmembrane transporter activity	GeneOntologyBiologicalProcess_GO:0022898_regulation of transmembrane transporter activity	10	AGT,BCL2,CHRNA4,DLG4,DRD2,DRD3,DRD4,FMR1,KCNAB1,NLGN1,NOS1,RELN
527	GO: Biological Process	GO:0032147	activation of protein kinase activity	GeneOntologyBiologicalProcess_GO:0032147_activation of protein kinase activity	10	ADORA1,ADRB2,AGT,BRAF,CHRNA7,DRD2,DRD4,IGF1,LRRK2,NGF,NTRK1,PSEN1,SOD1
528	GO: Biological Process	GO:0001975	response to amphetamine	GeneOntologyBiologicalProcess_GO:0001975_response to amphetamine	10	ADORA2A,DBH,DRD1,DRD2,DRD3,DRD4,DRD5,GRIN1,GRIN2A,SLC18A2,SOD1,TH
529	GO: Biological Process	GO:0044070	regulation of anion transport	GeneOntologyBiologicalProcess_GO:0044070_regulation of anion transport	10	ABAT,ADORA1,ADORA2A,AGT,AGTR2,APOE,CHRNA4,DRD1,DRD2,DRD3,DRD4,GRIK1,GRIN2B,GRM7,NOS1,SNCA
530	GO: Biological Process	GO:0033138	positive regulation of peptidyl-serine phosphorylation	GeneOntologyBiologicalProcess_GO:0033138_positive regulation of peptidyl-serine phosphorylation	10	AGT,BCL2,BDNF,BRAF,NTRK2,PAK1,SNCA
531	GO: Biological Process	GO:0044705	multi-organism reproductive behavior	GeneOntologyBiologicalProcess_GO:0044705_multi-organism reproductive behavior	10	APP,AR,DRD1,DRD5,GRIN1,TH
532	GO: Biological Process	GO:0009308	amine metabolic process	GeneOntologyBiologicalProcess_GO:0009308_amine metabolic process	10	ABAT,CHAT,COMT,DBH,DRD1,DRD4,HDC,MAOA,MECP2,PAFAH1B1,SLC6A3,SNCA,TPH2
533	GO: Biological Process	GO:0051050	positive regulation of transport	GeneOntologyBiologicalProcess_GO:0051050_positive regulation of transport	10	ABAT,ADORA1,ADORA2A,ADRB2,AGT,AGTR2,APOE,ATP2B2,BCL2,CASR,CDK5,CDK5R1,CHRNA4,DRD1,DRD2,DRD3,DRD4,FMR1,GNAS,GRIK1,GRIN2B,IGF1,NLGN1,NOS1,PPP3CB,PRKCA,RELN,SNAP25,SNCA,SYNJ1
534	GO: Biological Process	GO:0055067	monovalent inorganic cation homeostasis	GeneOntologyBiologicalProcess_GO:0055067_monovalent inorganic cation homeostasis	10	ADORA1,ADORA2A,AGT,AGTR2,BCL2,COMT,DRD2,DRD3,GNAS,KCNMA1,LRRK2
535	GO: Biological Process	GO:0046907	intracellular transport	GeneOntologyBiologicalProcess_GO:0046907_intracellular transport	10	ADORA1,ADRB2,AGT,AGTR2,APOE,APP,BCL2,BRAF,CDK5,CDK5R1,CTNNB1,DRD1,DRD2,FMR1,GNAS,GRIA1,GRIK2,IGF1,ITPR3,LRRK2,MAPT,NGF,NLGN1,NOS1,NPC1,PACS1,PAFAH1B1,PEX13,PPP3CB,PSEN1,SLC18A2,SLC1A3,SNAP25,SNCA,SOD1,SYN1,SYNJ1,TSC2,WWC1
536	GO: Biological Process	GO:0031344	regulation of cell projection organization	GeneOntologyBiologicalProcess_GO:0031344_regulation of cell projection organization	10	APOE,BDNF,BRAF,CDK5,CDK5R1,FMR1,GRIN1,IL1RAPL1,KALRN,LRRK2,MAPT,NGF,NLGN1,NTRK1,NTRK2,PAFAH1B1,PSEN1,RELN,SNAP25,VLDLR
537	GO: Biological Process	GO:1901215	negative regulation of neuron death	GeneOntologyBiologicalProcess_GO:1901215_negative regulation of neuron death	10	ADORA2A,AGT,AGTR2,APOE,BCL2,BDNF,BRAF,CDK5,CTNNB1,GRIK2,GRIN1,IGF1,KRAS,LRRK2,MECP2,NGF,NTF4,NTRK1,NTRK2,PSEN1,SNCA,SOD1
539	GO: Biological Process	GO:0009152	purine ribonucleotide biosynthetic process	GeneOntologyBiologicalProcess_GO:0009152_purine ribonucleotide biosynthetic process	10	ADORA2A,ADRB2,APOE,DRD1,DRD2,DRD3,DRD4,DRD5,GNAS,GRM7,NOS1,PRKCA
540	GO: Biological Process	GO:0071869	response to catecholamine	GeneOntologyBiologicalProcess_GO:0071869_response to catecholamine	10	APP,DRD1,DRD5,GNAS,LRRK2,NOS1,SNCA
541	GO: Biological Process	GO:0007417	central nervous system development	GeneOntologyBiologicalProcess_GO:0007417_central nervous system development	10	ABAT,ADORA2A,AGT,AGTR2,APP,ATP2B2,BCL2,CASP3,CDK5,CDK5R1,CTNNB1,DRD1,DRD2,DRD3,FMR1,GRIK1,GRIN1,IGF1,KCNAB1,KRAS,LRRK2,MAPT,MECP2,NKX2-1,NTRK2,PAFAH1B1,PAK1,PBX3,PEX13,PRKCA,PSEN1,PSEN2,RELN,SLC6A3,SLC6A4,SRR,TH,VLDLR
542	GO: Biological Process	GO:0045860	positive regulation of protein kinase activity	GeneOntologyBiologicalProcess_GO:0045860_positive regulation of protein kinase activity	10	ACE,ADORA1,ADRB2,AGT,BRAF,CDK5,CDK5R1,CHRNA7,DRD2,DRD4,IGF1,KRAS,LRRK2,NGF,NTRK1,PAK1,PSEN1,RELN,SNCA,SOD1,VLDLR
543	GO: Biological Process	GO:0032846	positive regulation of homeostatic process	GeneOntologyBiologicalProcess_GO:0032846_positive regulation of homeostatic process	10	ABAT,ADORA2A,AGT,AGTR2,CTNNB1,DRD1,DRD2,DRD3,NPC1,PPP3CB,SNCA
544	GO: Biological Process	GO:0009165	nucleotide biosynthetic process	GeneOntologyBiologicalProcess_GO:0009165_nucleotide biosynthetic process	10	ADORA2A,ADRB2,APOE,DRD1,DRD2,DRD3,DRD4,DRD5,GNAS,GRM7,NOS1,PRKCA
545	GO: Biological Process	GO:1901615	organic hydroxy compound metabolic process	GeneOntologyBiologicalProcess_GO:1901615_organic hydroxy compound metabolic process	10	ABAT,ADH1C,AGTR2,APOE,APP,ATP2B2,BCL2,CHAT,COMT,DBH,DRD1,DRD2,DRD3,DRD4,GRIN2A,HDC,IGF1,KCNMA1,MAOA,MECP2,NPC1,PAFAH1B1,RELN,SLC6A3,SNCA,SOD1,SYNJ1,TH,TPH2,TYR,VLDLR
546	GO: Biological Process	GO:0015718	monocarboxylic acid transport	GeneOntologyBiologicalProcess_GO:0015718_monocarboxylic acid transport	10	ABAT,ACE,AGTR2,APOE,DRD2,DRD3,DRD4,GRIK1,PAK1
547	GO: Biological Process	GO:0031346	positive regulation of cell projection organization	GeneOntologyBiologicalProcess_GO:0031346_positive regulation of cell projection organization	10	APOE,BDNF,BRAF,FMR1,IL1RAPL1,KALRN,MAPT,NGF,NLGN1,NTRK1,NTRK2,PAFAH1B1,PSEN1,RELN,VLDLR
548	GO: Biological Process	GO:0001101	response to acid chemical	GeneOntologyBiologicalProcess_GO:0001101_response to acid chemical	10	ADH1C,BCL2,BDNF,CASP3,DRD1,GNAS,GRIN2A,NGF,NTRK1,NTRK2,SLC1A3,SLC6A4,SYNJ1,TH
549	GO: Biological Process	GO:2000463	positive regulation of excitatory postsynaptic potential	GeneOntologyBiologicalProcess_GO:2000463_positive regulation of excitatory postsynaptic potential	10	DLG4,DRD4,GRIN1,GRIN2A,NLGN1,RELN
550	GO: Biological Process	GO:0051248	negative regulation of protein metabolic process	GeneOntologyBiologicalProcess_GO:0051248_negative regulation of protein metabolic process	10	ACE2,ADORA2A,AGT,APOE,APP,CASP3,CDK5,CTNNB1,DLG3,DRD1,DRD5,FMR1,GRIN2A,IGF1,LRRK2,MECP2,NGF,NOS1,PAFAH1B1,PRKCA,PSEN1,PSEN2,SNCA,TSC2
551	GO: Biological Process	GO:0045981	positive regulation of nucleotide metabolic process	GeneOntologyBiologicalProcess_GO:0045981_positive regulation of nucleotide metabolic process	10	ADORA2A,ADRB2,APOE,DRD1,DRD5,GNAS,IGF1,NOS1,PRKCA
552	GO: Biological Process	GO:0072503	cellular divalent inorganic cation homeostasis	GeneOntologyBiologicalProcess_GO:0072503_cellular divalent inorganic cation homeostasis	10	AGT,APOE,APP,ATP2B2,BCL2,CASR,CHRNA7,DLG4,DRD1,DRD2,DRD3,DRD4,DRD5,GRIK2,GRIN1,ITPR3,NGF,NOS1,PRKCA,PSEN1,PSEN2,SNCA
553	GO: Biological Process	GO:0030001	metal ion transport	GeneOntologyBiologicalProcess_GO:0030001_metal ion transport	10	ACE,ADORA1,ADORA2A,ADRB2,AGT,ATP2B2,BCL2,CASR,CDK5,CHRNA4,CHRNA7,CTNNB1,DRD1,DRD2,DRD3,DRD4,FMR1,GNAS,GRIN1,GRIN2A,GRIN2B,GRM7,IGF1,IL1RAPL1,ITPR3,KCNAB1,KCND2,KCNMA1,NGF,NOS1,PSEN1,PSEN2,SCN1A,SNAP25,SNCA
554	GO: Biological Process	GO:0071310	cellular response to organic substance	GeneOntologyBiologicalProcess_GO:0071310_cellular response to organic substance	10	AGT,AGTR2,APP,AR,BCL2,BDNF,CASP3,CTNNB1,DRD1,DRD5,GNAS,GRIN2A,IGF1,ITPR3,KRAS,LRRK2,MT-ND3,NGF,NKX2-1,NOS1,NPC1,NTRK1,NTRK2,PAFAH1B1,PAK1,PPP3CB,PRKCA,SLC6A4,SNCA,SOD1,TH,TSC2,VLDLR
555	GO: Biological Process	GO:0055082	cellular chemical homeostasis	GeneOntologyBiologicalProcess_GO:0055082_cellular chemical homeostasis	10	AGT,AGTR2,APOE,APP,ATP2B2,BCL2,CASR,CHRNA7,DLG4,DRD1,DRD2,DRD3,DRD4,DRD5,GRIK2,GRIN1,IGF1,ITPR3,KCNMA1,LRRK2,NGF,NOS1,PPP3CB,PRKCA,PSEN1,PSEN2,SNCA,SOD1,TH
556	GO: Biological Process	GO:0048167	regulation of synaptic plasticity	GeneOntologyBiologicalProcess_GO:0048167_regulation of synaptic plasticity	10	ADORA1,ADORA2A,AGT,APOE,ATP2B2,BDNF,BRAF,CDK5,DLG4,DRD1,DRD2,DRD5,FMR1,GRIA1,GRIK1,GRIK2,GRIN1,GRIN2A,GRIN2B,ITPR3,KRAS,MAPT,MECP2,NLGN1,NOS1,NTRK2,PAK1,PPP3CB,PSEN1,PSEN2,RELN,SNAP25,SNCA
557	GO: Biological Process	GO:0023051	regulation of signaling	GeneOntologyBiologicalProcess_GO:0023051_regulation of signaling	10	ABAT,ACE2,ADORA1,ADORA2A,ADRB2,AGT,AGTR2,APOE,APP,AR,ATP2B2,BCL2,BDNF,BRAF,CASR,CDK5,CDK5R1,CHAT,CHRNA4,CHRNA7,CTNNB1,DBH,DLG4,DRD1,DRD2,DRD3,DRD4,DRD5,DYRK1A,FMR1,GNAS,GRIA1,GRIA3,GRIK1,GRIK2,GRIN1,GRIN2A,GRIN2B,GRM7,IGF1,ITPR3,KALRN,KRAS,LRRK2,MAPT,MECP2,NGF,NKX2-1,NLGN1,NOS1,NTRK1,NTRK2,PAFAH1B1,PAK1,PPP3CB,PRKCA,PSEN1,PSEN2,RELN,SLC1A3,SLC6A4,SNAP25,SNCA,SOD1,SYN1,SYNJ1,TSC2,WWC1
558	GO: Biological Process	GO:0048583	regulation of response to stimulus	GeneOntologyBiologicalProcess_GO:0048583_regulation of response to stimulus	10	ABAT,ACE,ACE2,ADORA1,ADORA2A,ADRB2,AGT,AGTR2,APOE,APP,AR,BCL2,BDNF,BRAF,CASP3,CASR,CDK5,CDK5R1,CHRNA4,CHRNA7,CTNNB1,DBH,DLG4,DRD1,DRD2,DRD3,DRD4,DYRK1A,FMR1,GNAS,GRIK2,GRIN1,GRIN2A,GRIN2B,IGF1,KALRN,KRAS,LRRK2,NGB,NGF,NKX2-1,NLGN1,NOS1,NPC1,NTRK1,NTRK2,PACS1,PAFAH1B1,PAK1,PEX13,PPP3CB,PRKCA,PSEN1,PSEN2,RELN,SCN1A,SLC1A3,SLC6A3,SNCA,SOD1,TSC2,WWC1
560	GO: Biological Process	GO:0006939	smooth muscle contraction	GeneOntologyBiologicalProcess_GO:0006939_smooth muscle contraction	10	ABAT,ADORA1,ADRB2,AGT,DRD1,DRD2,KCNMA1,SOD1
561	GO: Biological Process	GO:0009259	ribonucleotide metabolic process	GeneOntologyBiologicalProcess_GO:0009259_ribonucleotide metabolic process	10	ADORA2A,ADRB2,APOE,ATP2B2,BDNF,DLG3,DLG4,DRD1,DRD2,DRD3,DRD4,DRD5,GNAS,GRM7,IGF1,LRRK2,MECP2,NOS1,PRKCA,SNCA
562	GO: Biological Process	GO:0010243	response to organonitrogen compound	GeneOntologyBiologicalProcess_GO:0010243_response to organonitrogen compound	10	ABAT,ADORA2A,ADRB2,AGT,AGTR2,APP,BCL2,BRAF,CASP3,CDK5,CHRNA4,CHRNA7,CTNNB1,DBH,DLG4,DRD1,DRD2,DRD3,DRD4,DRD5,GNAS,GRIN1,GRIN2A,IGF1,ITPR3,KALRN,LRRK2,NOS1,NTRK1,NTRK2,PAK1,PRKCA,SLC18A2,SLC1A3,SLC6A3,SLC6A4,SNCA,SOD1,SRR,TH,TSC2,TYR,VLDLR
563	GO: Biological Process	GO:0043627	response to estrogen	GeneOntologyBiologicalProcess_GO:0043627_response to estrogen	10	ADRB2,CASP3,CTNNB1,DRD1,IGF1,KCNMA1,MECP2,NOS1,PRKCA,SLC6A4,TH,TPH2
564	GO: Biological Process	GO:0021766	hippocampus development	GeneOntologyBiologicalProcess_GO:0021766_hippocampus development	10	CASP3,CDK5,CDK5R1,DRD1,NKX2-1,PAFAH1B1,RELN
565	GO: Biological Process	GO:0000165	MAPK cascade	GeneOntologyBiologicalProcess_GO:0000165_MAPK cascade	10	ACE2,ADORA1,ADRB2,AGT,APOE,AR,BRAF,CASR,CHRNA7,CTNNB1,DLG4,DRD2,DRD4,GRIK2,GRIN1,GRIN2A,GRIN2B,GRIN2D,IGF1,KRAS,LRRK2,NGF,NTRK1,NTRK2,PAFAH1B1,PAK1,PRKCA,PSEN1,SOD1,TSC2,WWC1
567	GO: Biological Process	GO:0050877	nervous system process	GeneOntologyBiologicalProcess_GO:0050877_nervous system process	10	ACE,ACE2,ADORA1,ADORA2A,ADRB2,AGT,AGTR2,APP,ATP2B2,BDNF,BRAF,CASP3,CDK5,CHAT,CHRNA4,CHRNA7,COMT,DBH,DLG4,DRD1,DRD2,DRD3,DRD4,DRD5,FMR1,GNAS,GRIA1,GRIK2,GRIN1,GRIN2A,GRIN2B,GRIN2D,GRM7,IGF1,ITPR3,KALRN,KCNAB1,KCND2,KCNMA1,KRAS,MECP2,NGB,NGF,NLGN1,NOS1,NTF4,NTRK1,NTRK2,PAFAH1B1,PAK1,PBX3,PPP3CB,PRKCA,PSEN1,PSEN2,RELN,SCN1A,SLC1A3,SLC6A3,SLC6A4,SNAP25,SOD1,SYNJ1,TH,TYR,VLDLR
568	GO: Biological Process	GO:0050433	regulation of catecholamine secretion	GeneOntologyBiologicalProcess_GO:0050433_regulation of catecholamine secretion	10	ABAT,ADORA2A,AGT,AGTR2,CHRNA4,CHRNA7,DRD2,DRD3,SNCA
570	GO: Biological Process	GO:0022037	metencephalon development	GeneOntologyBiologicalProcess_GO:0022037_metencephalon development	10	ABAT,AGTR2,ATP2B2,BCL2,CDK5,CDK5R1,GRIN1,MECP2
571	GO: Biological Process	GO:0046942	carboxylic acid transport	GeneOntologyBiologicalProcess_GO:0046942_carboxylic acid transport	10	ABAT,ACE,ACE2,ADORA1,ADORA2A,AGT,AGTR2,APOE,BDNF,DRD2,DRD3,DRD4,GRIK1,GRIN2B,GRM7,NTRK2,PAK1,PSEN1,SLC1A3,SNAP25,SNCA
572	GO: Biological Process	GO:0097061	dendritic spine organization	GeneOntologyBiologicalProcess_GO:0097061_dendritic spine organization	10	APOE,CDK5,CDK5R1,DLG4,KALRN,LRRK2,NLGN1,PAFAH1B1,RELN
573	GO: Biological Process	GO:0060292	long term synaptic depression	GeneOntologyBiologicalProcess_GO:0060292_long term synaptic depression	10	ADORA1,DRD1,DRD5,FMR1,GRIA1,MAPT
574	GO: Biological Process	GO:0099536	synaptic signaling	GeneOntologyBiologicalProcess_GO:0099536_synaptic signaling	10	ABAT,ADORA1,ADORA2A,ADRB2,AGT,APOE,ATP2B2,BDNF,BRAF,CDK5,CDK5R1,CHAT,CHRNA4,CHRNA7,CTNNB1,DBH,DLG3,DLG4,DRD1,DRD2,DRD3,DRD4,DRD5,FMR1,GABRA2,GAD1,GRIA1,GRIA3,GRIK1,GRIK2,GRIN1,GRIN2A,GRIN2B,GRIN2D,GRM7,ITPR3,KALRN,KCND2,KCNMA1,KRAS,LRRK2,MAPT,MECP2,NGF,NLGN1,NOS1,NTRK1,NTRK2,PAFAH1B1,PAK1,PPP3CB,PSEN1,PSEN2,RELN,SLC18A2,SLC1A3,SLC6A3,SLC6A4,SNAP25,SNCA,SYN1,SYNJ1,TH
575	GO: Biological Process	GO:1901214	regulation of neuron death	GeneOntologyBiologicalProcess_GO:1901214_regulation of neuron death	10	ADORA2A,AGT,AGTR2,APOE,BCL2,BDNF,BRAF,CASP3,CDK5,CDK5R1,CTNNB1,GRIK2,GRIN1,GRM7,IGF1,KCNMA1,KRAS,LRRK2,MECP2,NGF,NOS1,NTF4,NTRK1,NTRK2,PSEN1,SNCA,SOD1
576	GO: Biological Process	GO:0002791	regulation of peptide secretion	GeneOntologyBiologicalProcess_GO:0002791_regulation of peptide secretion	10	ABAT,ADORA1,CASR,DRD2,GNAS,ITPR3,NOS1,PPP3CB,PRKCA,SNAP25
577	GO: Biological Process	GO:0002028	regulation of sodium ion transport	GeneOntologyBiologicalProcess_GO:0002028_regulation of sodium ion transport	10	ADRB2,AGT,DRD2,DRD3,DRD4,GNAS,NOS1
578	GO: Biological Process	GO:0008217	regulation of blood pressure	GeneOntologyBiologicalProcess_GO:0008217_regulation of blood pressure	10	ABAT,ACE,ACE2,ADORA1,ADRB2,AGT,AGTR2,AR,CHRNA7,DRD2,DRD3,DRD5,GNAS,MECP2,NKX2-1,NOS1,SOD1
579	GO: Biological Process	GO:0043549	regulation of kinase activity	GeneOntologyBiologicalProcess_GO:0043549_regulation of kinase activity	10	ACE,ADORA1,ADORA2A,ADRB2,AGT,APOE,APP,BRAF,CASP3,CDK5,CDK5R1,CHRNA7,DRD1,DRD2,DRD4,DRD5,IGF1,KRAS,LRRK2,NGF,NTRK1,PAK1,PRKCA,PSEN1,PSEN2,RELN,SNCA,SOD1,TSC2,VLDLR
580	GO: Biological Process	GO:0043278	response to morphine	GeneOntologyBiologicalProcess_GO:0043278_response to morphine	10	DRD1,DRD2,DRD3,GRIN1,SRR
581	GO: Biological Process	GO:0006979	response to oxidative stress	GeneOntologyBiologicalProcess_GO:0006979_response to oxidative stress	10	APOE,APP,BCL2,CASP3,CHRNA4,LRRK2,MAPT,MT-ND1,MT-ND3,NGB,NOS1,PRKCA,PSEN1,SNCA,SOD1
582	GO: Biological Process	GO:0032845	negative regulation of homeostatic process	GeneOntologyBiologicalProcess_GO:0032845_negative regulation of homeostatic process	10	ADORA1,BCL2,COMT,DRD1,DRD2,GNAS,ITPR3,NGF,NOS1,SNCA
583	GO: Biological Process	GO:0097479	synaptic vesicle localization	GeneOntologyBiologicalProcess_GO:0097479_synaptic vesicle localization	10	BRAF,CDK5,CTNNB1,FMR1,LRRK2,NLGN1,PSEN1,SNAP25,SNCA,SYN1,SYNJ1
584	GO: Biological Process	GO:1903531	negative regulation of secretion by cell	GeneOntologyBiologicalProcess_GO:1903531_negative regulation of secretion by cell	10	ABAT,ADORA1,AGTR2,BRAF,DRD2,DRD3,DRD4,FMR1,GRM7,IL1RAPL1,NOS1,SNCA
585	GO: Biological Process	GO:0051339	regulation of lyase activity	GeneOntologyBiologicalProcess_GO:0051339_regulation of lyase activity	10	ADORA2A,ADRB2,DRD1,DRD2,DRD3,DRD4,DRD5,GNAS,GRM7,NOS1,PRKCA
586	GO: Biological Process	GO:0019098	reproductive behavior	GeneOntologyBiologicalProcess_GO:0019098_reproductive behavior	10	APP,AR,DBH,DRD1,DRD5,GRIN1,TH
587	GO: Biological Process	GO:0030003	cellular cation homeostasis	GeneOntologyBiologicalProcess_GO:0030003_cellular cation homeostasis	10	AGT,AGTR2,APOE,APP,ATP2B2,BCL2,CASR,CHRNA7,DLG4,DRD1,DRD2,DRD3,DRD4,DRD5,GRIK2,GRIN1,ITPR3,KCNMA1,LRRK2,NGF,NOS1,PRKCA,PSEN1,PSEN2,SNCA,SOD1
588	GO: Biological Process	GO:0045187	regulation of circadian sleep/wake cycle, sleep	GeneOntologyBiologicalProcess_GO:0045187_regulation of circadian sleep/wake cycle, sleep	10	ADORA1,ADORA2A,DRD1,DRD2,DRD3
590	GO: Biological Process	GO:0006811	ion transport	GeneOntologyBiologicalProcess_GO:0006811_ion transport	10	ABAT,ACE,ACE2,ADORA1,ADORA2A,ADRB2,AGT,AGTR2,APOE,ATP2B2,BCL2,BDNF,CASR,CDK5,CHRNA4,CHRNA7,CTNNB1,DLG3,DLG4,DRD1,DRD2,DRD3,DRD4,FMR1,GABRA2,GNAS,GRIA1,GRIA3,GRIK1,GRIK2,GRIN1,GRIN2A,GRIN2B,GRIN2D,GRM7,IGF1,IL1RAPL1,ITPR3,KCNAB1,KCND2,KCNMA1,NGF,NLGN1,NOS1,NTRK2,PAK1,PSEN1,PSEN2,RELN,SCN1A,SLC18A2,SLC1A3,SLC6A3,SLC6A4,SNAP25,SNCA
591	GO: Biological Process	GO:0040007	growth	GeneOntologyBiologicalProcess_GO:0040007_growth	10	ADRB2,AGT,AGTR2,APOE,APP,AR,BCL2,BDNF,CDK5,CDK5R1,CHAT,CTNNB1,DRD2,DRD3,GNAS,IGF1,MAPT,NGF,PAFAH1B1,PPP3CB,SLC6A3,SLC6A4,SOD1,WWC1
592	GO: Biological Process	GO:0035640	exploration behavior	GeneOntologyBiologicalProcess_GO:0035640_exploration behavior	10	ABAT,AGTR2,CHRNA4,DLG4,GAD1,LRRK2
593	GO: Biological Process	GO:0044085	cellular component biogenesis	GeneOntologyBiologicalProcess_GO:0044085_cellular component biogenesis	10	ACE,ACE2,ADRB2,AGT,APOE,APP,AR,BCL2,BDNF,BRAF,CDK5,CHRNA4,CTNNB1,DACH1,DLG4,DRD1,DRD2,FMR1,GRIA1,GRIN1,GRIN2A,IL1RAPL1,ITPR3,KCND2,KCNMA1,LRRK2,MAPT,MECP2,NLGN1,NTRK1,NTRK2,PAFAH1B1,PAK1,PRKCA,PSEN1,PSEN2,RELN,SLC6A4,SNAP25,SNCA,SRR,SYNJ1,TSC2
594	GO: Biological Process	GO:0051046	regulation of secretion	GeneOntologyBiologicalProcess_GO:0051046_regulation of secretion	10	ABAT,ADORA1,ADORA2A,AGT,AGTR2,BRAF,CASR,CDK5,CHRNA4,CHRNA7,COMT,DRD2,DRD3,DRD4,FMR1,GNAS,GRIK1,GRIN2B,GRM7,IGF1,IL1RAPL1,ITPR3,LRRK2,NGF,NLGN1,NOS1,NTRK2,PPP3CB,PRKCA,SNAP25,SNCA,SYN1
595	GO: Biological Process	GO:0048812	neuron projection morphogenesis	GeneOntologyBiologicalProcess_GO:0048812_neuron projection morphogenesis	10	ADORA2A,APOE,APP,BCL2,BDNF,BRAF,CDK5,CDK5R1,DLG4,DRD2,GRIN1,IL1RAPL1,KALRN,KRAS,LRRK2,MAPT,NGF,NKX2-1,NLGN1,NTF4,NTRK1,NTRK2,PAFAH1B1,PAK1,PPP3CB,PRKCA,PSEN1,RELN,VLDLR
596	GO: Biological Process	GO:0023057	negative regulation of signaling	GeneOntologyBiologicalProcess_GO:0023057_negative regulation of signaling	10	ACE2,ADORA1,ADRB2,AGT,AGTR2,APOE,AR,BCL2,BDNF,BRAF,CTNNB1,DRD1,DRD2,DRD3,DRD5,DYRK1A,FMR1,GRIA1,GRIK1,GRIK2,IGF1,LRRK2,MAPT,NKX2-1,NOS1,PAFAH1B1,PRKCA,PSEN1,PSEN2,SLC6A4,SNCA,TSC2,WWC1
597	GO: Biological Process	GO:0007617	mating behavior	GeneOntologyBiologicalProcess_GO:0007617_mating behavior	10	APP,AR,DRD1,DRD5,GRIN1,TH
598	GO: Biological Process	GO:0030801	positive regulation of cyclic nucleotide metabolic process	GeneOntologyBiologicalProcess_GO:0030801_positive regulation of cyclic nucleotide metabolic process	10	ADORA2A,ADRB2,APOE,DRD1,DRD5,GNAS,NOS1,PRKCA
600	GO: Biological Process	GO:0098815	modulation of excitatory postsynaptic potential	GeneOntologyBiologicalProcess_GO:0098815_modulation of excitatory postsynaptic potential	10	DLG4,DRD4,GRIN1,GRIN2A,LRRK2,NLGN1,RELN
601	GO: Biological Process	GO:0032386	regulation of intracellular transport	GeneOntologyBiologicalProcess_GO:0032386_regulation of intracellular transport	10	AGTR2,BCL2,BRAF,CDK5,CDK5R1,DRD1,FMR1,IGF1,LRRK2,MAPT,NGF,NLGN1,NOS1,PPP3CB,SNCA,SYN1,SYNJ1,WWC1
602	GO: Biological Process	GO:0009653	anatomical structure morphogenesis	GeneOntologyBiologicalProcess_GO:0009653_anatomical structure morphogenesis	10	ACE,ADORA2A,ADRB2,AGT,AGTR2,APOE,APP,AR,ATP2B2,BCL2,BDNF,BRAF,CASP3,CASR,CDK5,CDK5R1,CHRNA7,CTNNB1,DLG3,DLG4,DRD2,GNAS,GRIN1,IGF1,IL1RAPL1,KALRN,KRAS,LRRK2,MAPT,NGF,NKX2-1,NLGN1,NOS1,NTF4,NTRK1,NTRK2,PAFAH1B1,PAK1,PPP3CB,PRKCA,PSEN1,PSEN2,RELN,SLC1A3,SLC6A4,SOD1,TH,TSC2,VLDLR
603	GO: Biological Process	GO:0061001	regulation of dendritic spine morphogenesis	GeneOntologyBiologicalProcess_GO:0061001_regulation of dendritic spine morphogenesis	10	CDK5,CDK5R1,KALRN,LRRK2,NLGN1,PAFAH1B1,RELN
604	GO: Biological Process	GO:0015837	amine transport	GeneOntologyBiologicalProcess_GO:0015837_amine transport	10	ABAT,ADORA1,ADORA2A,AGT,AGTR2,CHRNA4,CHRNA7,DRD1,DRD2,DRD3,DRD4,GRIK1,GRIN2B,GRM7,SLC18A2,SNCA,TH
605	GO: Biological Process	GO:1901566	organonitrogen compound biosynthetic process	GeneOntologyBiologicalProcess_GO:1901566_organonitrogen compound biosynthetic process	10	ABAT,ADORA2A,ADRB2,AGTR2,APOE,APP,CHAT,DBH,DRD1,DRD2,DRD3,DRD4,DRD5,FMR1,GAD1,GNAS,GRM7,HDC,IGF1,NOS1,PRKCA,SLC1A3,SLC6A3,SNCA,SRR,TH,TPH2
606	GO: Biological Process	GO:0009628	response to abiotic stimulus	GeneOntologyBiologicalProcess_GO:0009628_response to abiotic stimulus	10	ABAT,ADORA1,ADRB2,AGT,APP,ATP2B2,BCL2,BRAF,CASP3,CDK5,CHAT,CHRNA4,CHRNA7,CTNNB1,DBH,DRD1,DRD2,DRD3,DRD4,DRD5,FMR1,GRIN1,GRIN2A,GRIN2B,GRIN2D,IGF1,KCND2,KCNMA1,KRAS,MECP2,NKX2-1,NOS1,NTRK1,NTRK2,PAK1,PSEN2,SLC1A3,SLC6A4,SOD1,TH,TSC2,TYR,VLDLR
607	GO: Biological Process	GO:0051674	localization of cell	GeneOntologyBiologicalProcess_GO:0051674_localization of cell	10	ACE,ADORA1,AGT,AGTR2,APOE,BCL2,BRAF,CDK5,CDK5R1,CHRNA7,CTNNB1,DACH1,DBH,DRD1,DRD2,DRD5,IGF1,KRAS,LRRK2,MAPT,NKX2-1,NTRK2,PAFAH1B1,PAK1,PEX13,PRKCA,PSEN1,RELN,WWC1
608	GO: Biological Process	GO:0003016	respiratory system process	GeneOntologyBiologicalProcess_GO:0003016_respiratory system process	10	ADORA1,ADRB2,MECP2,NLGN1,PBX3
609	GO: Biological Process	GO:0050795	regulation of behavior	GeneOntologyBiologicalProcess_GO:0050795_regulation of behavior	10	ADORA1,ADORA2A,DLG4,DRD1,DRD2,DRD3,NLGN1,RELN
610	GO: Biological Process	GO:0071867	response to monoamine	GeneOntologyBiologicalProcess_GO:0071867_response to monoamine	10	ADRB2,APP,DRD1,DRD5,GNAS,LRRK2,NOS1,SNCA
611	GO: Biological Process	GO:0098655	cation transmembrane transport	GeneOntologyBiologicalProcess_GO:0098655_cation transmembrane transport	10	AGT,ATP2B2,CHRNA4,CHRNA7,DRD1,DRD2,DRD3,DRD4,FMR1,GRIN1,GRIN2A,GRIN2D,GRM7,IL1RAPL1,ITPR3,KCNAB1,KCND2,KCNMA1,NGF,NOS1,PSEN1,SCN1A,SLC6A3,SNAP25,SNCA
612	GO: Biological Process	GO:1900006	positive regulation of dendrite development	GeneOntologyBiologicalProcess_GO:1900006_positive regulation of dendrite development	10	APOE,FMR1,IL1RAPL1,KALRN,NLGN1,PAFAH1B1,PSEN1,RELN,VLDLR
613	GO: Biological Process	GO:1902533	positive regulation of intracellular signal transduction	GeneOntologyBiologicalProcess_GO:1902533_positive regulation of intracellular signal transduction	10	ADORA1,ADRB2,AGT,AR,BCL2,BRAF,CHRNA7,CTNNB1,DRD2,DRD4,GNAS,IGF1,KRAS,LRRK2,NGF,NLGN1,NTRK1,NTRK2,PAK1,PRKCA,PSEN1,RELN,SOD1,WWC1
615	GO: Biological Process	GO:0043065	positive regulation of apoptotic process	GeneOntologyBiologicalProcess_GO:0043065_positive regulation of apoptotic process	10	ACE,ADORA2A,ADRB2,AGT,AGTR2,BCL2,CASP3,CDK5,CDK5R1,CTNNB1,GRIK2,GRIN1,GRIN2A,KALRN,KCNMA1,NGF,PSEN1,PSEN2,SNCA,SOD1
616	GO: Biological Process	GO:0032890	regulation of organic acid transport	GeneOntologyBiologicalProcess_GO:0032890_regulation of organic acid transport	10	ABAT,ADORA1,ADORA2A,AGT,AGTR2,GRIK1,GRIN2B,GRM7,SNCA
617	GO: Biological Process	GO:0051957	positive regulation of amino acid transport	GeneOntologyBiologicalProcess_GO:0051957_positive regulation of amino acid transport	10	ABAT,ADORA2A,AGT,GRIK1,GRIN2B
618	GO: Biological Process	GO:0032940	secretion by cell	GeneOntologyBiologicalProcess_GO:0032940_secretion by cell	10	ABAT,ADORA1,ADORA2A,AGT,AGTR2,APP,BDNF,BRAF,CASR,CDK5,CHAT,CHRNA4,CHRNA7,DRD2,DRD3,DRD4,FMR1,GAD1,GNAS,GRIN2B,GRM7,IGF1,IL1RAPL1,ITPR3,LRRK2,MECP2,NGF,NLGN1,NOS1,NTRK2,PAFAH1B1,PAK1,PPP3CB,PRKCA,PSEN1,SLC18A2,SLC1A3,SNAP25,SNCA,SOD1,SYN1,SYNJ1
619	GO: Biological Process	GO:0009636	response to toxic substance	GeneOntologyBiologicalProcess_GO:0009636_response to toxic substance	10	APOE,BCL2,CASP3,DRD2,GRIA1,GRIA3,GRIN1,SLC18A2,SLC1A3,SLC6A4,SOD1,TH
620	GO: Biological Process	GO:0060291	long-term synaptic potentiation	GeneOntologyBiologicalProcess_GO:0060291_long-term synaptic potentiation	10	BRAF,DRD1,DRD2,GRIN2A,GRIN2B,ITPR3,MECP2,NLGN1,NOS1,NTRK2,PAK1,RELN,SNAP25,SNCA
621	GO: Biological Process	GO:0021543	pallium development	GeneOntologyBiologicalProcess_GO:0021543_pallium development	10	CASP3,CDK5,CDK5R1,CTNNB1,DRD1,GRIN1,NKX2-1,NTRK2,PAFAH1B1,PEX13,PSEN1,RELN,TH,VLDLR
623	GO: Biological Process	GO:0060078	regulation of postsynaptic membrane potential	GeneOntologyBiologicalProcess_GO:0060078_regulation of postsynaptic membrane potential	10	ABAT,ADORA1,ADORA2A,ADRB2,BDNF,CDK5,CHRNA4,DLG4,DRD4,GRIK1,GRIK2,GRIN1,GRIN2A,GRIN2B,GRIN2D,LRRK2,MECP2,NLGN1,RELN,SCN1A,SNCA
625	GO: Biological Process	GO:0031279	regulation of cyclase activity	GeneOntologyBiologicalProcess_GO:0031279_regulation of cyclase activity	10	ADORA2A,ADRB2,DRD1,DRD2,DRD3,DRD4,DRD5,GNAS,GRM7,NOS1,PRKCA
626	GO: Biological Process	GO:0042490	mechanoreceptor differentiation	GeneOntologyBiologicalProcess_GO:0042490_mechanoreceptor differentiation	10	ATP2B2,BDNF,KCNMA1,NTF4,NTRK1,NTRK2,PAFAH1B1,SOD1
627	GO: Biological Process	GO:0032844	regulation of homeostatic process	GeneOntologyBiologicalProcess_GO:0032844_regulation of homeostatic process	10	ABAT,ADORA1,ADORA2A,AGT,AGTR2,BCL2,COMT,CTNNB1,DRD1,DRD2,DRD3,GNAS,ITPR3,LRRK2,NGF,NOS1,NPC1,PPP3CB,SNCA
628	GO: Biological Process	GO:0044062	regulation of excretion	GeneOntologyBiologicalProcess_GO:0044062_regulation of excretion	10	ADORA1,ADORA2A,AGT,AGTR2,COMT,DRD2,DRD3,GNAS
629	GO: Biological Process	GO:0061138	morphogenesis of a branching epithelium	GeneOntologyBiologicalProcess_GO:0061138_morphogenesis of a branching epithelium	10	AGT,AGTR2,AR,BCL2,CASR,CTNNB1,IGF1,KRAS,NKX2-1,PAK1
631	GO: Biological Process	GO:0050886	endocrine process	GeneOntologyBiologicalProcess_GO:0050886_endocrine process	10	ACE,ACE2,AGT,AGTR2,DRD3,DRD5,GNAS,KRAS,NKX2-1
632	GO: Biological Process	GO:0006810	transport	GeneOntologyBiologicalProcess_GO:0006810_transport	10	ABAT,ACE,ACE2,ADORA1,ADORA2A,ADRB2,AGT,AGTR2,APOE,APP,AR,ATP2B2,BCL2,BDNF,BRAF,CASR,CDK5,CDK5R1,CHAT,CHRNA4,CHRNA7,COMT,CTNNB1,DLG3,DLG4,DRD1,DRD2,DRD3,DRD4,FMR1,GABRA2,GAD1,GNAS,GRIA1,GRIA3,GRIK1,GRIK2,GRIN1,GRIN2A,GRIN2B,GRIN2D,GRM7,IGF1,IL1RAPL1,ITPR3,KALRN,KCNAB1,KCND2,KCNMA1,LRRK2,MAPT,MECP2,MT-ND1,MT-ND3,NGB,NGF,NLGN1,NOS1,NPC1,NTRK2,PACS1,PAFAH1B1,PAK1,PEX13,PPP3CB,PRKCA,PSEN1,PSEN2,RELN,S…
633	GO: Biological Process	GO:0071248	cellular response to metal ion	GeneOntologyBiologicalProcess_GO:0071248_cellular response to metal ion	10	BRAF,CTNNB1,GRIN1,GRIN2A,LRRK2,SNCA,SOD1,TH,TPH2
635	GO: Biological Process	GO:0015849	organic acid transport	GeneOntologyBiologicalProcess_GO:0015849_organic acid transport	10	ABAT,ACE,ACE2,ADORA1,ADORA2A,AGT,AGTR2,APOE,BDNF,DRD2,DRD3,DRD4,GRIK1,GRIN2B,GRM7,NTRK2,PAK1,PSEN1,SLC1A3,SNAP25,SNCA
636	GO: Biological Process	GO:0009892	negative regulation of metabolic process	GeneOntologyBiologicalProcess_GO:0009892_negative regulation of metabolic process	10	ACE,ACE2,ADORA1,ADORA2A,AGT,APOE,APP,AR,BCL2,CASP3,CDK5,CDK5R1,COMT,CTNNB1,DACH1,DLG3,DLG4,DRD1,DRD2,DRD3,DRD4,DRD5,DYRK1A,FMR1,GRIN2A,GRM7,IGF1,LRRK2,MECP2,NGF,NKX2-1,NOS1,NPC1,PAFAH1B1,PRKCA,PSEN1,PSEN2,SLC18A2,SNCA,SOD1,TSC2,VLDLR,WWC1
637	GO: Biological Process	GO:0001775	cell activation	GeneOntologyBiologicalProcess_GO:0001775_cell activation	10	ABAT,ADORA2A,ADRB2,AGT,APOE,BCL2,BMX,BRAF,CASP3,CHRNA4,CHRNA7,CTNNB1,GNAS,IGF1,ITPR3,NTRK1,PAK1,PPP3CB,PRKCA,PSEN1,PSEN2,SNCA,SOD1
638	GO: Biological Process	GO:0048858	cell projection morphogenesis	GeneOntologyBiologicalProcess_GO:0048858_cell projection morphogenesis	10	ADORA2A,APOE,APP,BCL2,BDNF,BRAF,CDK5,CDK5R1,DLG4,DRD2,GRIN1,IL1RAPL1,KALRN,KRAS,LRRK2,MAPT,NGF,NKX2-1,NLGN1,NTF4,NTRK1,NTRK2,PAFAH1B1,PAK1,PPP3CB,PRKCA,PSEN1,RELN,VLDLR
639	GO: Biological Process	GO:0048148	behavioral response to cocaine	GeneOntologyBiologicalProcess_GO:0048148_behavioral response to cocaine	10	ABAT,CDK5,DRD1,DRD2,DRD3,DRD4,KALRN,NOS1,SNCA
640	GO: Biological Process	GO:0070482	response to oxygen levels	GeneOntologyBiologicalProcess_GO:0070482_response to oxygen levels	10	ABAT,ADORA1,ADRB2,BCL2,CASP3,CHAT,CHRNA4,CHRNA7,DRD1,DRD2,IGF1,KCND2,KCNMA1,MECP2,NOS1,PAK1,PSEN2,SLC6A4,TH,TSC2,VLDLR
641	GO: Biological Process	GO:0015672	monovalent inorganic cation transport	GeneOntologyBiologicalProcess_GO:0015672_monovalent inorganic cation transport	10	ABAT,ADORA1,ADORA2A,ADRB2,AGT,CHRNA4,DRD1,DRD2,DRD3,DRD4,GNAS,KCNAB1,KCND2,KCNMA1,NOS1,PSEN1,SCN1A,SLC18A2,SLC6A3,SLC6A4,SNAP25,SNCA
642	GO: Biological Process	GO:0032413	negative regulation of ion transmembrane transporter activity	GeneOntologyBiologicalProcess_GO:0032413_negative regulation of ion transmembrane transporter activity	10	AGT,DRD2,DRD3,DRD4,FMR1,KCNAB1
643	GO: Biological Process	GO:0045762	positive regulation of adenylate cyclase activity	GeneOntologyBiologicalProcess_GO:0045762_positive regulation of adenylate cyclase activity	10	ADORA2A,ADRB2,DRD1,DRD5,GNAS,PRKCA
644	GO: Biological Process	GO:0055086	nucleobase-containing small molecule metabolic process	GeneOntologyBiologicalProcess_GO:0055086_nucleobase-containing small molecule metabolic process	10	ADORA2A,ADRB2,APOE,ATP2B2,BDNF,DLG3,DLG4,DRD1,DRD2,DRD3,DRD4,DRD5,GNAS,GRM7,IGF1,LRRK2,MECP2,NOS1,PRKCA,SNCA
645	GO: Biological Process	GO:0034763	negative regulation of transmembrane transport	GeneOntologyBiologicalProcess_GO:0034763_negative regulation of transmembrane transport	10	ACE,AGT,DRD2,DRD3,DRD4,FMR1,KCNAB1
646	GO: Biological Process	GO:1901701	cellular response to oxygen-containing compound	GeneOntologyBiologicalProcess_GO:1901701_cellular response to oxygen-containing compound	10	AGT,AGTR2,APP,CDK5R1,CTNNB1,DRD1,DRD5,GNAS,GRIN2A,IGF1,ITPR3,LRRK2,NGB,NOS1,NTRK2,PAK1,PPP3CB,PRKCA,SLC6A4,SNCA,SOD1,TH,TSC2,VLDLR
647	GO: Biological Process	GO:0009891	positive regulation of biosynthetic process	GeneOntologyBiologicalProcess_GO:0009891_positive regulation of biosynthetic process	10	ADORA2A,ADRB2,AGT,AGTR2,APOE,APP,AR,BDNF,CTNNB1,DRD1,DRD2,DRD3,DRD5,FMR1,GNAS,GRIN1,IGF1,KRAS,MECP2,NGF,NKX2-1,NOS1,NTRK1,PBX3,PPP3CB,PRKCA,PSEN1,RELN,SNCA,TSC2
648	GO: Biological Process	GO:0051650	establishment of vesicle localization	GeneOntologyBiologicalProcess_GO:0051650_establishment of vesicle localization	10	BRAF,CDK5,CTNNB1,FMR1,GRIA1,LRRK2,NLGN1,PAFAH1B1,PSEN1,SNAP25,SNCA,SYN1,SYNJ1
649	GO: Biological Process	GO:0042981	regulation of apoptotic process	GeneOntologyBiologicalProcess_GO:0042981_regulation of apoptotic process	10	ACE,ADORA1,ADORA2A,ADRB2,AGT,AGTR2,APOE,AR,BCL2,BDNF,BRAF,CASP3,CDK5,CDK5R1,CTNNB1,DBH,GRIK2,GRIN1,GRIN2A,IGF1,KALRN,KCNMA1,KRAS,LRRK2,MECP2,NGF,NOS1,NTF4,NTRK1,NTRK2,PRKCA,PSEN1,PSEN2,SNCA,SOD1
650	GO: Biological Process	GO:0007188	adenylate cyclase-modulating G-protein coupled receptor signaling pathway	GeneOntologyBiologicalProcess_GO:0007188_adenylate cyclase-modulating G-protein coupled receptor signaling pathway	10	ADORA1,ADORA2A,ADRB2,CASR,DRD1,DRD2,DRD3,DRD4,DRD5,GNAS,GRM7
651	GO: Biological Process	GO:0048667	cell morphogenesis involved in neuron differentiation	GeneOntologyBiologicalProcess_GO:0048667_cell morphogenesis involved in neuron differentiation	10	APOE,APP,ATP2B2,BCL2,BDNF,BRAF,CDK5,CDK5R1,DLG4,DRD2,GRIN1,IL1RAPL1,KALRN,KRAS,LRRK2,MAPT,NGF,NKX2-1,NLGN1,NTRK1,NTRK2,PAFAH1B1,PAK1,PPP3CB,PRKCA,PSEN1,RELN,SLC1A3,SOD1,VLDLR
653	GO: Biological Process	GO:0006928	movement of cell or subcellular component	GeneOntologyBiologicalProcess_GO:0006928_movement of cell or subcellular component	10	ACE,ADORA1,AGT,AGTR2,APOE,APP,BCL2,BDNF,BRAF,CDK5,CDK5R1,CHRNA7,CTNNB1,DACH1,DBH,DRD1,DRD2,DRD5,IGF1,KRAS,LRRK2,MAPT,NGF,NKX2-1,NTRK1,NTRK2,PAFAH1B1,PAK1,PEX13,PRKCA,PSEN1,RELN,SOD1,WWC1
654	GO: Biological Process	GO:0021885	forebrain cell migration	GeneOntologyBiologicalProcess_GO:0021885_forebrain cell migration	10	CDK5,CDK5R1,CTNNB1,DRD1,DRD2,LRRK2,NKX2-1,PAFAH1B1,PEX13,PSEN1,RELN
655	GO: Biological Process	GO:1903522	regulation of blood circulation	GeneOntologyBiologicalProcess_GO:1903522_regulation of blood circulation	10	ACE,ACE2,ADORA1,ADRB2,AGT,AGTR2,ATP2B2,CASR,CHRNA7,DBH,DRD1,DRD2,ITPR3,KCND2,KCNMA1,NOS1,PRKCA,TH
656	GO: Biological Process	GO:0043523	regulation of neuron apoptotic process	GeneOntologyBiologicalProcess_GO:0043523_regulation of neuron apoptotic process	10	ADORA2A,AGT,AGTR2,APOE,BCL2,BDNF,BRAF,CASP3,CDK5,CDK5R1,CTNNB1,GRIK2,GRIN1,KCNMA1,KRAS,MECP2,NGF,NTF4,NTRK1,NTRK2,PSEN1,SNCA,SOD1
657	GO: Biological Process	GO:0001990	regulation of systemic arterial blood pressure by hormone	GeneOntologyBiologicalProcess_GO:0001990_regulation of systemic arterial blood pressure by hormone	10	ACE,ACE2,AGT,AGTR2,DRD3,DRD5,NKX2-1
658	GO: Biological Process	GO:0034613	cellular protein localization	GeneOntologyBiologicalProcess_GO:0034613_cellular protein localization	10	ADORA1,AGT,AGTR2,APOE,AR,BCL2,BRAF,CDK5,CDK5R1,CTNNB1,DLG3,DLG4,DRD1,GRIK2,GRIN2B,IGF1,KALRN,LRRK2,NLGN1,NPC1,PACS1,PAK1,PEX13,PPP3CB,RELN,TSC2
659	GO: Biological Process	GO:0051384	response to glucocorticoid	GeneOntologyBiologicalProcess_GO:0051384_response to glucocorticoid	10	ADRB2,AGTR2,BCL2,CASP3,IGF1,KRAS,MT-ND3,SLC18A2,TH,TPH2
660	GO: Biological Process	GO:1903793	positive regulation of anion transport	GeneOntologyBiologicalProcess_GO:1903793_positive regulation of anion transport	10	ABAT,ADORA2A,AGT,APOE,CHRNA4,DRD2,DRD4,GRIK1,GRIN2B
662	GO: Biological Process	GO:0051940	regulation of catecholamine uptake involved in synaptic transmission	GeneOntologyBiologicalProcess_GO:0051940_regulation of catecholamine uptake involved in synaptic transmission	10	DRD1,DRD2,DRD3,DRD4,SNCA
663	GO: Biological Process	GO:0003014	renal system process	GeneOntologyBiologicalProcess_GO:0003014_renal system process	10	ADORA1,ADORA2A,ADRB2,AGT,AGTR2,BCL2,COMT,DRD2,DRD3,GNAS,KCNMA1
664	GO: Biological Process	GO:0006629	lipid metabolic process	GeneOntologyBiologicalProcess_GO:0006629_lipid metabolic process	10	ADH1C,ADORA1,ADRB2,AGT,APOE,APP,CHAT,COMT,DRD1,DRD2,DRD3,FAAH,IGF1,KCNMA1,MECP2,NKX2-1,NPC1,PAFAH1B1,PEX13,SNCA,SOD1,SYNJ1,TH,VLDLR
665	GO: Biological Process	GO:1901293	nucleoside phosphate biosynthetic process	GeneOntologyBiologicalProcess_GO:1901293_nucleoside phosphate biosynthetic process	10	ADORA2A,ADRB2,APOE,DRD1,DRD2,DRD3,DRD4,DRD5,GNAS,GRM7,NOS1,PRKCA
666	GO: Biological Process	GO:0048814	regulation of dendrite morphogenesis	GeneOntologyBiologicalProcess_GO:0048814_regulation of dendrite morphogenesis	10	CDK5,CDK5R1,GRIN1,IL1RAPL1,KALRN,LRRK2,NLGN1,PAFAH1B1,RELN
667	GO: Biological Process	GO:0033554	cellular response to stress	GeneOntologyBiologicalProcess_GO:0033554_cellular response to stress	10	ADRB2,AGT,APOE,BCL2,BRAF,CASP3,CASR,CDK5,CDK5R1,CHRNA4,COMT,DRD1,DYRK1A,FMR1,GRIK2,KCND2,KRAS,LRRK2,MAPT,NGB,NPC1,PAFAH1B1,PAK1,PEX13,PSEN1,SLC1A3,SNCA,SOD1,TSC2,VLDLR
668	GO: Biological Process	GO:0070727	cellular macromolecule localization	GeneOntologyBiologicalProcess_GO:0070727_cellular macromolecule localization	10	ADORA1,AGT,AGTR2,APOE,AR,BCL2,BRAF,CDK5,CDK5R1,CTNNB1,DLG3,DLG4,DRD1,GRIK2,GRIN2B,IGF1,KALRN,LRRK2,NLGN1,NPC1,PACS1,PAK1,PEX13,PPP3CB,RELN,TSC2
669	GO: Biological Process	GO:0051051	negative regulation of transport	GeneOntologyBiologicalProcess_GO:0051051_negative regulation of transport	10	ABAT,ACE,ADORA1,AGT,AGTR2,APOE,BCL2,BRAF,CDK5,COMT,DLG4,DRD2,DRD3,DRD4,FMR1,GNAS,GRM7,IL1RAPL1,KCNAB1,LRRK2,MAPT,NOS1,PRKCA,SLC18A2,SNCA
671	GO: Biological Process	GO:1903421	regulation of synaptic vesicle recycling	GeneOntologyBiologicalProcess_GO:1903421_regulation of synaptic vesicle recycling	10	CDK5,NLGN1,SNCA,SYNJ1
672	GO: Biological Process	GO:0009190	cyclic nucleotide biosynthetic process	GeneOntologyBiologicalProcess_GO:0009190_cyclic nucleotide biosynthetic process	10	ADORA2A,ADRB2,APOE,DRD1,DRD2,DRD3,DRD4,DRD5,GNAS,GRM7,NOS1,PRKCA
673	GO: Biological Process	GO:1903532	positive regulation of secretion by cell	GeneOntologyBiologicalProcess_GO:1903532_positive regulation of secretion by cell	10	ABAT,ADORA2A,AGT,AGTR2,CASR,CDK5,CHRNA4,DRD2,GRIN2B,IGF1,NLGN1,PPP3CB,PRKCA,SNAP25,SNCA
674	GO: Biological Process	GO:0042326	negative regulation of phosphorylation	GeneOntologyBiologicalProcess_GO:0042326_negative regulation of phosphorylation	10	ACE2,ADORA2A,APOE,CASP3,DRD1,DRD5,IGF1,LRRK2,NOS1,PAFAH1B1,PRKCA,PSEN1,PSEN2,SNCA,TSC2
675	GO: Biological Process	GO:0035815	positive regulation of renal sodium excretion	GeneOntologyBiologicalProcess_GO:0035815_positive regulation of renal sodium excretion	10	ADORA2A,AGT,AGTR2,DRD2,DRD3
676	GO: Biological Process	GO:0051234	establishment of localization	GeneOntologyBiologicalProcess_GO:0051234_establishment of localization	10	ABAT,ACE,ACE2,ADORA1,ADORA2A,ADRB2,AGT,AGTR2,APOE,APP,AR,ATP2B2,BCL2,BDNF,BRAF,CASR,CDK5,CDK5R1,CHAT,CHRNA4,CHRNA7,COMT,CTNNB1,DLG3,DLG4,DRD1,DRD2,DRD3,DRD4,FMR1,GABRA2,GAD1,GNAS,GRIA1,GRIA3,GRIK1,GRIK2,GRIN1,GRIN2A,GRIN2B,GRIN2D,GRM7,IGF1,IL1RAPL1,ITPR3,KALRN,KCNAB1,KCND2,KCNMA1,LRRK2,MAPT,MECP2,MT-ND1,MT-ND3,NGB,NGF,NLGN1,NOS1,NPC1,NTRK2,PACS1,PAFAH1B1,PAK1,PEX13,PPP3CB,PRKCA,PSEN1,PSEN2,RELN,S…
677	GO: Biological Process	GO:0008344	adult locomotory behavior	GeneOntologyBiologicalProcess_GO:0008344_adult locomotory behavior	10	APP,CHAT,DRD1,DRD2,DRD4,GRIN1,GRIN2D,KCNMA1,MAPT,MECP2,NGF,NPC1,NTF4,PAFAH1B1,PBX3,SCN1A,SNCA
678	GO: Biological Process	GO:0051246	regulation of protein metabolic process	GeneOntologyBiologicalProcess_GO:0051246_regulation of protein metabolic process	10	ACE,ACE2,ADORA1,ADORA2A,ADRB2,AGT,AGTR2,APOE,APP,AR,BCL2,BDNF,BRAF,CASP3,CDK5,CDK5R1,CHRNA7,CTNNB1,DLG3,DRD1,DRD2,DRD4,DRD5,DYRK1A,FMR1,GNAS,GRIK2,GRIN2A,GRIN2B,IGF1,KRAS,LRRK2,MECP2,NGF,NOS1,NTRK1,NTRK2,PAFAH1B1,PAK1,PRKCA,PSEN1,PSEN2,RELN,SNCA,SOD1,TSC2,VLDLR,WWC1
679	GO: Biological Process	GO:0051047	positive regulation of secretion	GeneOntologyBiologicalProcess_GO:0051047_positive regulation of secretion	10	ABAT,ADORA1,ADORA2A,AGT,AGTR2,CASR,CDK5,CHRNA4,DRD2,DRD3,GRIK1,GRIN2B,IGF1,NLGN1,PPP3CB,PRKCA,SNAP25,SNCA
681	GO: Biological Process	GO:0051640	organelle localization	GeneOntologyBiologicalProcess_GO:0051640_organelle localization	10	BRAF,CDK5,CTNNB1,FMR1,GRIA1,LRRK2,MAPT,NLGN1,PAFAH1B1,PEX13,PSEN1,SNAP25,SNCA,SYN1,SYNJ1
682	GO: Biological Process	GO:0048589	developmental growth	GeneOntologyBiologicalProcess_GO:0048589_developmental growth	10	ADRB2,AGT,AGTR2,APOE,APP,AR,BCL2,BDNF,CDK5,CDK5R1,CHAT,CTNNB1,DRD2,DRD3,GNAS,IGF1,MAPT,NGF,PAFAH1B1,PPP3CB,SLC6A3,SLC6A4,SOD1,WWC1
683	GO: Biological Process	GO:0019614	catechol-containing compound catabolic process	GeneOntologyBiologicalProcess_GO:0019614_catechol-containing compound catabolic process	10	COMT,DBH,MAOA,SLC6A3
684	GO: Biological Process	GO:0071702	organic substance transport	GeneOntologyBiologicalProcess_GO:0071702_organic substance transport	10	ABAT,ACE,ACE2,ADORA1,ADORA2A,AGT,AGTR2,APOE,BDNF,BRAF,CASR,CDK5,CDK5R1,CHRNA4,CHRNA7,CTNNB1,DRD1,DRD2,DRD3,DRD4,FMR1,GNAS,GRIK1,GRIK2,GRIN2B,GRM7,IGF1,ITPR3,LRRK2,MECP2,NLGN1,NOS1,NPC1,NTRK2,PACS1,PAFAH1B1,PAK1,PEX13,PPP3CB,PRKCA,PSEN1,PSEN2,SLC18A2,SLC1A3,SLC6A3,SLC6A4,SNAP25,SNCA,TH,TSC2,VLDLR
685	GO: Biological Process	GO:0071870	cellular response to catecholamine stimulus	GeneOntologyBiologicalProcess_GO:0071870_cellular response to catecholamine stimulus	10	APP,DRD1,DRD5,GNAS,LRRK2,NOS1,SNCA
686	GO: Biological Process	GO:0009719	response to endogenous stimulus	GeneOntologyBiologicalProcess_GO:0009719_response to endogenous stimulus	10	ABAT,ADH1C,ADORA2A,ADRB2,AGT,AGTR2,APP,AR,BCL2,BDNF,BRAF,CASP3,CDK5,CHRNA4,CHRNA7,CTNNB1,DBH,DLG4,DRD1,DRD2,DRD3,DRD4,DRD5,GNAS,GRIN1,GRIN2A,IGF1,ITPR3,KALRN,KCNMA1,KRAS,LRRK2,MECP2,MT-ND3,NGF,NKX2-1,NOS1,NPC1,NTRK1,NTRK2,PAK1,PRKCA,SLC18A2,SLC1A3,SLC6A3,SLC6A4,SNCA,SOD1,SRR,TH,TPH2,TSC2,TYR,VLDLR
687	GO: Biological Process	GO:0071241	cellular response to inorganic substance	GeneOntologyBiologicalProcess_GO:0071241_cellular response to inorganic substance	10	BRAF,CTNNB1,FMR1,GRIN1,GRIN2A,LRRK2,SNCA,SOD1,TH,TPH2
688	GO: Biological Process	GO:0031175	neuron projection development	GeneOntologyBiologicalProcess_GO:0031175_neuron projection development	10	ADORA2A,APOE,APP,BCL2,BDNF,BRAF,CDK5,CDK5R1,CHAT,DLG4,DRD2,FMR1,GRIN1,IL1RAPL1,KALRN,KRAS,LRRK2,MAPT,MECP2,NGB,NGF,NKX2-1,NLGN1,NTF4,NTRK1,NTRK2,PAFAH1B1,PAK1,PPP3CB,PRKCA,PSEN1,RELN,SNAP25,VLDLR
689	GO: Biological Process	GO:0009968	negative regulation of signal transduction	GeneOntologyBiologicalProcess_GO:0009968_negative regulation of signal transduction	10	ACE2,ADRB2,AGT,AGTR2,APOE,AR,BCL2,CTNNB1,DRD2,DRD3,DYRK1A,IGF1,LRRK2,NKX2-1,NOS1,PAFAH1B1,PRKCA,PSEN1,PSEN2,SNCA,TSC2,WWC1
690	GO: Biological Process	GO:0016192	vesicle-mediated transport	GeneOntologyBiologicalProcess_GO:0016192_vesicle-mediated transport	10	ADORA1,ADORA2A,ADRB2,APOE,APP,BRAF,CDK5,CHRNA7,CTNNB1,DLG4,DRD2,DRD3,FMR1,GRIA1,IGF1,IL1RAPL1,KALRN,LRRK2,NLGN1,NPC1,PACS1,PAK1,PPP3CB,PRKCA,PSEN1,SLC18A2,SNAP25,SNCA,SOD1,SYN1,SYNJ1,TSC2,VLDLR
691	GO: Biological Process	GO:0051937	catecholamine transport	GeneOntologyBiologicalProcess_GO:0051937_catecholamine transport	10	ABAT,ADORA2A,AGT,AGTR2,CHRNA4,CHRNA7,DRD1,DRD2,DRD3,DRD4,MECP2,SLC18A2,SLC6A3,SNCA
692	GO: Biological Process	GO:0002209	behavioral defense response	GeneOntologyBiologicalProcess_GO:0002209_behavioral defense response	10	BCL2,BDNF,DRD1,DRD4,GRIK2,GRIN2B,GRM7,KALRN,MECP2
693	GO: Biological Process	GO:0050768	negative regulation of neurogenesis	GeneOntologyBiologicalProcess_GO:0050768_negative regulation of neurogenesis	10	APOE,APP,BDNF,CDK5,CDK5R1,CTNNB1,DRD3,MECP2,NLGN1,PAFAH1B1,PSEN1,SLC6A4
694	GO: Biological Process	GO:0008542	visual learning	GeneOntologyBiologicalProcess_GO:0008542_visual learning	10	APP,BRAF,CDK5,DBH,DRD1,DRD2,DRD3,DRD5,GRIN1,GRIN2A,KRAS,MECP2
695	GO: Biological Process	GO:0043271	negative regulation of ion transport	GeneOntologyBiologicalProcess_GO:0043271_negative regulation of ion transport	10	ABAT,ACE,ADORA1,AGT,AGTR2,APOE,BCL2,DRD2,DRD3,DRD4,FMR1,GRM7,KCNAB1,NOS1,SNCA
696	GO: Biological Process	GO:0033555	multicellular organismal response to stress	GeneOntologyBiologicalProcess_GO:0033555_multicellular organismal response to stress	10	BCL2,BDNF,COMT,DBH,DRD1,DRD4,GRIK1,GRIK2,GRIN2B,GRM7,KALRN,MECP2,NOS1,NTRK1,RELN
697	GO: Biological Process	GO:0022607	cellular component assembly	GeneOntologyBiologicalProcess_GO:0022607_cellular component assembly	10	ACE,ACE2,ADRB2,AGT,APOE,APP,AR,BCL2,BDNF,BRAF,CDK5,CHRNA4,CTNNB1,DACH1,DLG4,DRD1,DRD2,FMR1,GRIA1,GRIN1,GRIN2A,IL1RAPL1,ITPR3,KCND2,KCNMA1,LRRK2,MAPT,MECP2,NLGN1,NTRK1,NTRK2,PAFAH1B1,PAK1,PRKCA,PSEN1,PSEN2,RELN,SLC6A4,SNAP25,SNCA,SRR,SYNJ1,TSC2
698	GO: Biological Process	GO:0050806	positive regulation of synaptic transmission	GeneOntologyBiologicalProcess_GO:0050806_positive regulation of synaptic transmission	10	ABAT,ADORA1,ADORA2A,BRAF,DLG4,DRD1,DRD2,DRD4,FMR1,GRIA1,GRIK1,GRIK2,GRIN1,GRIN2A,GRIN2B,ITPR3,MECP2,NLGN1,NOS1,NTRK1,NTRK2,PAK1,RELN,SLC1A3,SNAP25,SNCA,SYNJ1
700	GO: Biological Process	GO:0006066	alcohol metabolic process	GeneOntologyBiologicalProcess_GO:0006066_alcohol metabolic process	10	ADH1C,APOE,APP,CHAT,DBH,IGF1,KCNMA1,MECP2,NPC1,PAFAH1B1,SNCA,SOD1,SYNJ1,VLDLR
702	GO: Biological Process	GO:0006796	phosphate-containing compound metabolic process	GeneOntologyBiologicalProcess_GO:0006796_phosphate-containing compound metabolic process	10	ACE,ACE2,ADORA1,ADORA2A,ADRB2,AGT,AGTR2,ANKK1,APOE,APP,AR,ATP2B2,BCL2,BDNF,BMX,BRAF,CASP3,CASR,CDK5,CDK5R1,CHAT,CHRNA7,CTNNB1,DLG3,DLG4,DRD1,DRD2,DRD3,DRD4,DRD5,DYRK1A,FMR1,GNAS,GRIK2,GRIN1,GRIN2A,GRIN2B,GRIN2D,GRM7,IGF1,KALRN,KRAS,LRRK2,MECP2,NGF,NKX2-1,NOS1,NTRK1,NTRK2,PAFAH1B1,PAK1,PPP3CB,PRKCA,PSEN1,PSEN2,RELN,SNCA,SOD1,SYNJ1,TSC2,VLDLR,WWC1
703	GO: Biological Process	GO:0032101	regulation of response to external stimulus	GeneOntologyBiologicalProcess_GO:0032101_regulation of response to external stimulus	10	ABAT,ACE,ACE2,ADORA1,ADORA2A,ADRB2,AGT,APOE,BRAF,CASP3,CASR,CDK5,CDK5R1,CHRNA7,DRD1,DRD2,DRD3,GRIN1,LRRK2,NPC1,PACS1,PEX13,PRKCA,SCN1A,SLC1A3,SLC6A3,TSC2
705	GO: Biological Process	GO:0098609	cell-cell adhesion	GeneOntologyBiologicalProcess_GO:0098609_cell-cell adhesion	10	ABAT,ADORA2A,ADRB2,BCL2,BMX,BRAF,CASP3,CDK5R1,CHRNA7,CTNNB1,GNAS,IGF1,IL1RAPL1,NLGN1,PAK1,PPP3CB,PRKCA,PSEN1,PSEN2,SOD1
706	GO: Biological Process	GO:0048638	regulation of developmental growth	GeneOntologyBiologicalProcess_GO:0048638_regulation of developmental growth	10	ADRB2,AGT,APOE,APP,AR,BCL2,BDNF,CDK5,CDK5R1,DRD2,DRD3,GNAS,IGF1,MAPT,NGF,PAFAH1B1,SLC6A3,SLC6A4,SOD1,WWC1
707	GO: Biological Process	GO:0001933	negative regulation of protein phosphorylation	GeneOntologyBiologicalProcess_GO:0001933_negative regulation of protein phosphorylation	10	ACE2,ADORA2A,APOE,CASP3,DRD1,DRD5,IGF1,LRRK2,NOS1,PAFAH1B1,PRKCA,PSEN1,PSEN2,SNCA,TSC2
708	GO: Biological Process	GO:0034765	regulation of ion transmembrane transport	GeneOntologyBiologicalProcess_GO:0034765_regulation of ion transmembrane transport	10	ACE,AGT,CASR,CHRNA4,CTNNB1,DLG4,DRD1,DRD2,DRD3,DRD4,FMR1,GRIK1,GRIN1,GRIN2A,GRIN2D,KCNAB1,KCND2,KCNMA1,NGF,NLGN1,NOS1,RELN,SCN1A,SNCA
709	GO: Biological Process	GO:0030030	cell projection organization	GeneOntologyBiologicalProcess_GO:0030030_cell projection organization	10	ADORA2A,APOE,APP,ATP2B2,BCL2,BDNF,BRAF,CDK5,CDK5R1,CHAT,DLG4,DRD2,FMR1,GRIN1,IL1RAPL1,KALRN,KRAS,LRRK2,MAPT,MECP2,NGB,NGF,NKX2-1,NLGN1,NTF4,NTRK1,NTRK2,PAFAH1B1,PAK1,PPP3CB,PRKCA,PSEN1,RELN,SNAP25,SOD1,TSC2,VLDLR
710	GO: Biological Process	GO:0097190	apoptotic signaling pathway	GeneOntologyBiologicalProcess_GO:0097190_apoptotic signaling pathway	10	ADORA1,ADORA2A,AGT,AGTR2,AR,BCL2,CASP3,CTNNB1,DBH,IGF1,LRRK2,MAPT,NGF,PRKCA,PSEN1,PSEN2,SOD1
711	GO: Biological Process	GO:0003073	regulation of systemic arterial blood pressure	GeneOntologyBiologicalProcess_GO:0003073_regulation of systemic arterial blood pressure	10	ACE,ACE2,ADORA1,ADRB2,AGT,AGTR2,AR,CHRNA7,DRD2,DRD3,DRD5,MECP2,NKX2-1
712	GO: Biological Process	GO:0045597	positive regulation of cell differentiation	GeneOntologyBiologicalProcess_GO:0045597_positive regulation of cell differentiation	10	ACE,AGT,APOE,AR,BCL2,BDNF,BRAF,CTNNB1,DRD2,FMR1,GNAS,IGF1,IL1RAPL1,KALRN,MAPT,NGF,NLGN1,NTRK1,NTRK2,PAFAH1B1,PRKCA,PSEN1,RELN,SYNJ1,VLDLR
713	GO: Biological Process	GO:0051341	regulation of oxidoreductase activity	GeneOntologyBiologicalProcess_GO:0051341_regulation of oxidoreductase activity	5.98882	AGT,AGTR2,APOE,DRD5,KRAS,LRRK2,SNCA
714	GO: Biological Process	GO:0051270	regulation of cellular component movement	GeneOntologyBiologicalProcess_GO:0051270_regulation of cellular component movement	5.98592	ACE,ADORA1,AGT,AGTR2,APOE,BCL2,BRAF,CDK5,DACH1,DRD1,DRD2,DRD5,IGF1,MAPT,NKX2-1,PAK1,PRKCA,RELN
715	GO: Biological Process	GO:0060562	epithelial tube morphogenesis	GeneOntologyBiologicalProcess_GO:0060562_epithelial tube morphogenesis	5.9836	AGT,AGTR2,AR,BCL2,CASR,CTNNB1,IGF1,KRAS,NKX2-1,PAK1,PSEN1,TSC2
716	GO: Biological Process	GO:0046777	protein autophosphorylation	GeneOntologyBiologicalProcess_GO:0046777_protein autophosphorylation	5.98097	ACE,BMX,CDK5,DYRK1A,LRRK2,NGF,NTRK1,NTRK2,PAK1,PRKCA
717	GO: Biological Process	GO:1901605	alpha-amino acid metabolic process	GeneOntologyBiologicalProcess_GO:1901605_alpha-amino acid metabolic process	5.94896	COMT,GAD1,HDC,MECP2,NOS1,SLC1A3,SRR,TH,TPH2,TYR
718	GO: Biological Process	GO:0021799	cerebral cortex radially oriented cell migration	GeneOntologyBiologicalProcess_GO:0021799_cerebral cortex radially oriented cell migration	5.93948	CDK5,CDK5R1,CTNNB1,PAFAH1B1,RELN
719	GO: Biological Process	GO:0009894	regulation of catabolic process	GeneOntologyBiologicalProcess_GO:0009894_regulation of catabolic process	5.93039	ADORA1,ADRB2,APOE,BCL2,CASP3,CDK5,CDK5R1,FMR1,GRIN2A,IGF1,LRRK2,MAPT,NPC1,PSEN1,PSEN2,SNCA,TSC2
720	GO: Biological Process	GO:1901137	carbohydrate derivative biosynthetic process	GeneOntologyBiologicalProcess_GO:1901137_carbohydrate derivative biosynthetic process	5.89989	ADORA2A,ADRB2,APOE,BCL2,CTNNB1,DRD1,DRD2,DRD3,DRD4,DRD5,GNAS,GRM7,IGF1,NOS1,NPC1,PRKCA,PSEN1
721	GO: Biological Process	GO:0045596	negative regulation of cell differentiation	GeneOntologyBiologicalProcess_GO:0045596_negative regulation of cell differentiation	5.89406	APOE,APP,BCL2,BDNF,CDK5,CDK5R1,CTNNB1,DRD3,IGF1,KRAS,MECP2,NKX2-1,NLGN1,PAFAH1B1,PSEN1,SLC6A4
722	GO: Biological Process	GO:0090407	organophosphate biosynthetic process	GeneOntologyBiologicalProcess_GO:0090407_organophosphate biosynthetic process	5.86518	ADORA2A,ADRB2,APOE,CHAT,DRD1,DRD2,DRD3,DRD4,DRD5,GNAS,GRM7,NOS1,PRKCA,SNCA,SYNJ1
723	GO: Biological Process	GO:0050796	regulation of insulin secretion	GeneOntologyBiologicalProcess_GO:0050796_regulation of insulin secretion	5.83225	ABAT,CASR,DRD2,GNAS,ITPR3,NOS1,PPP3CB,PRKCA,SNAP25
724	GO: Biological Process	GO:0044065	regulation of respiratory system process	GeneOntologyBiologicalProcess_GO:0044065_regulation of respiratory system process	5.81643	ADORA1,MECP2,NLGN1,PBX3
725	GO: Biological Process	GO:0050966	detection of mechanical stimulus involved in sensory perception of pain	GeneOntologyBiologicalProcess_GO:0050966_detection of mechanical stimulus involved in sensory perception of pain	5.81643	GRIN2A,GRIN2B,GRIN2D,NTRK1
726	GO: Biological Process	GO:1901160	primary amino compound metabolic process	GeneOntologyBiologicalProcess_GO:1901160_primary amino compound metabolic process	5.81643	ATP2B2,GRIN2A,MAOA,TPH2
727	GO: Biological Process	GO:0001881	receptor recycling	GeneOntologyBiologicalProcess_GO:0001881_receptor recycling	5.8114	GRIA1,GRIA3,PSEN1,PSEN2,SNCA
728	GO: Biological Process	GO:2000145	regulation of cell motility	GeneOntologyBiologicalProcess_GO:2000145_regulation of cell motility	5.80956	ACE,ADORA1,AGT,AGTR2,APOE,BCL2,BRAF,CDK5,DACH1,DRD1,DRD2,DRD5,IGF1,NKX2-1,PAK1,PRKCA,RELN
729	GO: Biological Process	GO:0050885	neuromuscular process controlling balance	GeneOntologyBiologicalProcess_GO:0050885_neuromuscular process controlling balance	5.80488	APP,ATP2B2,DLG4,KCNMA1,PAFAH1B1,SLC1A3
730	GO: Biological Process	GO:0051259	protein oligomerization	GeneOntologyBiologicalProcess_GO:0051259_protein oligomerization	5.80021	APP,AR,BRAF,CHRNA4,CTNNB1,GRIN1,GRIN2A,ITPR3,KCND2,KCNMA1,NLGN1,SLC6A4,SRR,TSC2
733	GO: Biological Process	GO:0009448	gamma-aminobutyric acid metabolic process	GeneOntologyBiologicalProcess_GO:0009448_gamma-aminobutyric acid metabolic process	5.78783	ABAT,GAD1,SLC1A3
735	GO: Biological Process	GO:0071902	positive regulation of protein serine/threonine kinase activity	GeneOntologyBiologicalProcess_GO:0071902_positive regulation of protein serine/threonine kinase activity	5.78596	AGT,CDK5R1,CHRNA7,DRD4,IGF1,KRAS,LRRK2,PAK1,PSEN1,SNCA,SOD1
736	GO: Biological Process	GO:1903409	reactive oxygen species biosynthetic process	GeneOntologyBiologicalProcess_GO:1903409_reactive oxygen species biosynthetic process	5.75352	AGT,AGTR2,IGF1,NOS1,SLC18A2,SNCA,SOD1
737	GO: Biological Process	GO:0030516	regulation of axon extension	GeneOntologyBiologicalProcess_GO:0030516_regulation of axon extension	5.75352	APOE,BDNF,CDK5,CDK5R1,MAPT,NGF,PAFAH1B1
738	GO: Biological Process	GO:0010039	response to iron ion	GeneOntologyBiologicalProcess_GO:0010039_response to iron ion	5.75025	ABAT,BCL2,DRD2,SLC6A3,SNCA
739	GO: Biological Process	GO:1904063	negative regulation of cation transmembrane transport	GeneOntologyBiologicalProcess_GO:1904063_negative regulation of cation transmembrane transport	5.72662	AGT,DRD2,DRD3,DRD4,FMR1,KCNAB1
740	GO: Biological Process	GO:0048646	anatomical structure formation involved in morphogenesis	GeneOntologyBiologicalProcess_GO:0048646_anatomical structure formation involved in morphogenesis	5.71119	ACE,ADRB2,AGT,AR,ATP2B2,CASP3,CDK5,CDK5R1,CHRNA7,CTNNB1,GNAS,NKX2-1,NOS1,NTF4,NTRK1,PAFAH1B1,PPP3CB,PRKCA,PSEN1,PSEN2,RELN,TSC2
741	GO: Biological Process	GO:0032355	response to estradiol	GeneOntologyBiologicalProcess_GO:0032355_response to estradiol	5.69432	CASP3,CTNNB1,DRD1,IGF1,MECP2,PRKCA,SLC6A4,TH
742	GO: Biological Process	GO:0030818	negative regulation of cAMP biosynthetic process	GeneOntologyBiologicalProcess_GO:0030818_negative regulation of cAMP biosynthetic process	5.69089	DRD2,DRD3,DRD4,GRM7,PRKCA
743	GO: Biological Process	GO:0017157	regulation of exocytosis	GeneOntologyBiologicalProcess_GO:0017157_regulation of exocytosis	5.6893	BRAF,CDK5,FMR1,IL1RAPL1,LRRK2,NLGN1,PRKCA,SNCA,SYN1
744	GO: Biological Process	GO:1900543	negative regulation of purine nucleotide metabolic process	GeneOntologyBiologicalProcess_GO:1900543_negative regulation of purine nucleotide metabolic process	5.68844	DRD2,DRD3,DRD4,GRM7,PRKCA,SNCA
745	GO: Biological Process	GO:0043525	positive regulation of neuron apoptotic process	GeneOntologyBiologicalProcess_GO:0043525_positive regulation of neuron apoptotic process	5.68844	CASP3,CDK5,CDK5R1,CTNNB1,GRIK2,KCNMA1
746	GO: Biological Process	GO:0010506	regulation of autophagy	GeneOntologyBiologicalProcess_GO:0010506_regulation of autophagy	5.68834	ADRB2,BCL2,CASP3,CDK5,CDK5R1,LRRK2,MAPT,NPC1,SNCA,TSC2
748	GO: Biological Process	GO:1901652	response to peptide	GeneOntologyBiologicalProcess_GO:1901652_response to peptide	5.64233	AGT,AGTR2,BRAF,CTNNB1,DRD1,GNAS,IGF1,NOS1,PAK1,PRKCA,TH,TSC2,VLDLR
749	GO: Biological Process	GO:0042445	hormone metabolic process	GeneOntologyBiologicalProcess_GO:0042445_hormone metabolic process	5.63732	ACE,ACE2,ADH1C,AGT,COMT,IGF1,KCNMA1,NGF,RELN
750	GO: Biological Process	GO:0007155	cell adhesion	GeneOntologyBiologicalProcess_GO:0007155_cell adhesion	5.6335	ABAT,ADORA2A,ADRB2,AGT,APP,BCL2,BMX,BRAF,CASP3,CDK5,CDK5R1,CHRNA7,CTNNB1,GNAS,IGF1,IL1RAPL1,NLGN1,PAK1,PPP3CB,PRKCA,PSEN1,PSEN2,RELN,SOD1
751	GO: Biological Process	GO:0051271	negative regulation of cellular component movement	GeneOntologyBiologicalProcess_GO:0051271_negative regulation of cellular component movement	5.62982	ADORA1,AGTR2,APOE,BCL2,BRAF,DACH1,DRD1,DRD2,DRD5,NKX2-1
752	GO: Biological Process	GO:0045980	negative regulation of nucleotide metabolic process	GeneOntologyBiologicalProcess_GO:0045980_negative regulation of nucleotide metabolic process	5.61389	DRD2,DRD3,DRD4,GRM7,PRKCA,SNCA
753	GO: Biological Process	GO:0016049	cell growth	GeneOntologyBiologicalProcess_GO:0016049_cell growth	5.58843	AGT,AGTR2,APOE,APP,AR,BCL2,BDNF,CDK5,CDK5R1,IGF1,MAPT,NGF,PAFAH1B1,PPP3CB
754	GO: Biological Process	GO:0030803	negative regulation of cyclic nucleotide biosynthetic process	GeneOntologyBiologicalProcess_GO:0030803_negative regulation of cyclic nucleotide biosynthetic process	5.57712	DRD2,DRD3,DRD4,GRM7,PRKCA
755	GO: Biological Process	GO:0032309	icosanoid secretion	GeneOntologyBiologicalProcess_GO:0032309_icosanoid secretion	5.57712	ACE,AGTR2,DRD2,DRD3,DRD4
756	GO: Biological Process	GO:0007190	activation of adenylate cyclase activity	GeneOntologyBiologicalProcess_GO:0007190_activation of adenylate cyclase activity	5.57712	ADRB2,DRD1,DRD5,GNAS,PRKCA
757	GO: Biological Process	GO:2001233	regulation of apoptotic signaling pathway	GeneOntologyBiologicalProcess_GO:2001233_regulation of apoptotic signaling pathway	5.56777	ADORA2A,AGT,AGTR2,AR,BCL2,CTNNB1,DBH,IGF1,LRRK2,PSEN1,PSEN2,SOD1
758	GO: Biological Process	GO:0010628	positive regulation of gene expression	GeneOntologyBiologicalProcess_GO:0010628_positive regulation of gene expression	5.55458	ADRB2,AGT,AGTR2,APP,AR,BDNF,BRAF,CASR,CTNNB1,DRD2,DRD3,FMR1,GRIN1,IGF1,KRAS,MECP2,NGF,NKX2-1,NOS1,NTRK1,NTRK2,PBX3,PPP3CB,PSEN1,RELN,SLC6A4,TSC2
759	GO: Biological Process	GO:0008544	epidermis development	GeneOntologyBiologicalProcess_GO:0008544_epidermis development	5.54464	ATP2B2,BCL2,CASP3,CTNNB1,GNAS,KCNMA1,NTF4,PAFAH1B1,PSEN1,PSEN2,SOD1
760	GO: Biological Process	GO:0032496	response to lipopolysaccharide	GeneOntologyBiologicalProcess_GO:0032496_response to lipopolysaccharide	5.52016	ACE,CASP3,COMT,IGF1,NKX2-1,NOS1,PRKCA,SNCA,SRR,TH,VLDLR
761	GO: Biological Process	GO:0051345	positive regulation of hydrolase activity	GeneOntologyBiologicalProcess_GO:0051345_positive regulation of hydrolase activity	5.51098	ADRB2,AGT,AGTR2,APP,CASP3,CASR,DLG4,GNAS,GRIN1,GRIN2A,GRIN2B,GRIN2D,KALRN,LRRK2,NGF,NTRK1,SNCA,TSC2
762	GO: Biological Process	GO:0035239	tube morphogenesis	GeneOntologyBiologicalProcess_GO:0035239_tube morphogenesis	5.50272	AGT,AGTR2,AR,BCL2,CASR,CTNNB1,IGF1,KRAS,NKX2-1,PAK1,PSEN1,TSC2
763	GO: Biological Process	GO:0009888	tissue development	GeneOntologyBiologicalProcess_GO:0009888_tissue development	5.49073	ADRB2,AGT,AGTR2,AR,ATP2B2,BCL2,BDNF,BMX,CASP3,CASR,CDK5,CTNNB1,DLG3,GNAS,IGF1,KCNAB1,KCNMA1,KRAS,NKX2-1,NTF4,NTRK1,PAFAH1B1,PAK1,PRKCA,PSEN1,PSEN2,SOD1,TSC2
765	GO: Biological Process	GO:0001661	conditioned taste aversion	GeneOntologyBiologicalProcess_GO:0001661_conditioned taste aversion	5.48855	DRD1,GRIN1,GRM7
767	GO: Biological Process	GO:0007193	adenylate cyclase-inhibiting G-protein coupled receptor signaling pathway	GeneOntologyBiologicalProcess_GO:0007193_adenylate cyclase-inhibiting G-protein coupled receptor signaling pathway	5.47154	ADORA1,CASR,DRD2,DRD3,DRD4,GRM7
768	GO: Biological Process	GO:0030815	negative regulation of cAMP metabolic process	GeneOntologyBiologicalProcess_GO:0030815_negative regulation of cAMP metabolic process	5.4694	DRD2,DRD3,DRD4,GRM7,PRKCA
769	GO: Biological Process	GO:0032892	positive regulation of organic acid transport	GeneOntologyBiologicalProcess_GO:0032892_positive regulation of organic acid transport	5.4694	ABAT,ADORA2A,AGT,GRIK1,GRIN2B
770	GO: Biological Process	GO:0006937	regulation of muscle contraction	GeneOntologyBiologicalProcess_GO:0006937_regulation of muscle contraction	5.46767	ABAT,ACE2,ADORA1,ADRB2,KCNMA1,NOS1,PRKCA,SOD1
771	GO: Biological Process	GO:0031329	regulation of cellular catabolic process	GeneOntologyBiologicalProcess_GO:0031329_regulation of cellular catabolic process	5.44697	ADRB2,APOE,BCL2,CASP3,CDK5,CDK5R1,FMR1,IGF1,LRRK2,MAPT,NPC1,PSEN1,PSEN2,SNCA,TSC2
772	GO: Biological Process	GO:0030072	peptide hormone secretion	GeneOntologyBiologicalProcess_GO:0030072_peptide hormone secretion	5.4327	ABAT,CASR,DRD2,GNAS,ITPR3,NOS1,PPP3CB,PRKCA,SLC18A2,SNAP25
773	GO: Biological Process	GO:0030809	negative regulation of nucleotide biosynthetic process	GeneOntologyBiologicalProcess_GO:0030809_negative regulation of nucleotide biosynthetic process	5.41762	DRD2,DRD3,DRD4,GRM7,PRKCA
774	GO: Biological Process	GO:1900372	negative regulation of purine nucleotide biosynthetic process	GeneOntologyBiologicalProcess_GO:1900372_negative regulation of purine nucleotide biosynthetic process	5.41762	DRD2,DRD3,DRD4,GRM7,PRKCA
775	GO: Biological Process	GO:0006813	potassium ion transport	GeneOntologyBiologicalProcess_GO:0006813_potassium ion transport	5.40553	ADORA1,ADRB2,DRD1,DRD2,KCNAB1,KCND2,KCNMA1,NOS1,SNAP25
776	GO: Biological Process	GO:0007635	chemosensory behavior	GeneOntologyBiologicalProcess_GO:0007635_chemosensory behavior	5.3986	CASR,DRD4,GRIN1,NTRK1
777	GO: Biological Process	GO:0014821	phasic smooth muscle contraction	GeneOntologyBiologicalProcess_GO:0014821_phasic smooth muscle contraction	5.3986	AGT,DRD1,DRD2,KCNMA1
778	GO: Biological Process	GO:1990138	neuron projection extension	GeneOntologyBiologicalProcess_GO:1990138_neuron projection extension	5.38948	APOE,BDNF,CDK5,CDK5R1,MAPT,NGF,PAFAH1B1,PPP3CB
779	GO: Biological Process	GO:0061387	regulation of extent of cell growth	GeneOntologyBiologicalProcess_GO:0061387_regulation of extent of cell growth	5.38616	APOE,BDNF,CDK5,CDK5R1,MAPT,NGF,PAFAH1B1
780	GO: Biological Process	GO:0071715	icosanoid transport	GeneOntologyBiologicalProcess_GO:0071715_icosanoid transport	5.36713	ACE,AGTR2,DRD2,DRD3,DRD4
781	GO: Biological Process	GO:1901571	fatty acid derivative transport	GeneOntologyBiologicalProcess_GO:1901571_fatty acid derivative transport	5.36713	ACE,AGTR2,DRD2,DRD3,DRD4
782	GO: Biological Process	GO:0042110	T cell activation	GeneOntologyBiologicalProcess_GO:0042110_T cell activation	5.36229	ADORA2A,BCL2,BMX,BRAF,CASP3,CHRNA7,CTNNB1,IGF1,PAK1,PPP3CB,PSEN1,PSEN2,SOD1
783	GO: Biological Process	GO:0070489	T cell aggregation	GeneOntologyBiologicalProcess_GO:0070489_T cell aggregation	5.36229	ADORA2A,BCL2,BMX,BRAF,CASP3,CHRNA7,CTNNB1,IGF1,PAK1,PPP3CB,PSEN1,PSEN2,SOD1
784	GO: Biological Process	GO:0071593	lymphocyte aggregation	GeneOntologyBiologicalProcess_GO:0071593_lymphocyte aggregation	5.35298	ADORA2A,BCL2,BMX,BRAF,CASP3,CHRNA7,CTNNB1,IGF1,PAK1,PPP3CB,PSEN1,PSEN2,SOD1
785	GO: Biological Process	GO:0006914	autophagy	GeneOntologyBiologicalProcess_GO:0006914_autophagy	5.34464	ADRB2,BCL2,CASP3,CDK5,CDK5R1,LRRK2,MAPT,NPC1,PEX13,PSEN1,SCN1A,SLC1A3,SNCA,TSC2
786	GO: Biological Process	GO:0060627	regulation of vesicle-mediated transport	GeneOntologyBiologicalProcess_GO:0060627_regulation of vesicle-mediated transport	5.3437	BRAF,CDK5,DLG4,DRD2,FMR1,IL1RAPL1,LRRK2,NLGN1,PRKCA,SNCA,SYN1,SYNJ1,TSC2
787	GO: Biological Process	GO:0015833	peptide transport	GeneOntologyBiologicalProcess_GO:0015833_peptide transport	5.34182	ABAT,ADORA1,CASR,DRD2,GNAS,ITPR3,NOS1,PPP3CB,PRKCA,SLC18A2,SNAP25
788	GO: Biological Process	GO:0090087	regulation of peptide transport	GeneOntologyBiologicalProcess_GO:0090087_regulation of peptide transport	5.33836	ABAT,ADORA1,CASR,DRD2,GNAS,ITPR3,NOS1,PPP3CB,PRKCA,SNAP25
789	GO: Biological Process	GO:0048678	response to axon injury	GeneOntologyBiologicalProcess_GO:0048678_response to axon injury	5.33736	APOE,BCL2,BRAF,DRD2,NTRK1,SOD1
790	GO: Biological Process	GO:0032870	cellular response to hormone stimulus	GeneOntologyBiologicalProcess_GO:0032870_cellular response to hormone stimulus	5.33694	AGT,AGTR2,AR,BDNF,CTNNB1,DRD1,GNAS,IGF1,MT-ND3,NPC1,NTRK2,PAK1,PRKCA,TSC2,VLDLR
791	GO: Biological Process	GO:0002237	response to molecule of bacterial origin	GeneOntologyBiologicalProcess_GO:0002237_response to molecule of bacterial origin	5.33025	ACE,CASP3,COMT,IGF1,NKX2-1,NOS1,PRKCA,SNCA,SRR,TH,VLDLR
792	GO: Biological Process	GO:0072358	cardiovascular system development	GeneOntologyBiologicalProcess_GO:0072358_cardiovascular system development	5.32131	ACE,ADRB2,AGT,AGTR2,APOE,CASP3,CHRNA7,CTNNB1,IGF1,KCNAB1,MECP2,NTRK1,NTRK2,PPP3CB,PRKCA,PSEN1,TH,TSC2,VLDLR
793	GO: Biological Process	GO:0072359	circulatory system development	GeneOntologyBiologicalProcess_GO:0072359_circulatory system development	5.32131	ACE,ADRB2,AGT,AGTR2,APOE,CASP3,CHRNA7,CTNNB1,IGF1,KCNAB1,MECP2,NTRK1,NTRK2,PPP3CB,PRKCA,PSEN1,TH,TSC2,VLDLR
794	GO: Biological Process	GO:0030800	negative regulation of cyclic nucleotide metabolic process	GeneOntologyBiologicalProcess_GO:0030800_negative regulation of cyclic nucleotide metabolic process	5.31788	DRD2,DRD3,DRD4,GRM7,PRKCA
795	GO: Biological Process	GO:0045773	positive regulation of axon extension	GeneOntologyBiologicalProcess_GO:0045773_positive regulation of axon extension	5.31788	APOE,BDNF,MAPT,NGF,PAFAH1B1
796	GO: Biological Process	GO:0090279	regulation of calcium ion import	GeneOntologyBiologicalProcess_GO:0090279_regulation of calcium ion import	5.31372	ACE,CASR,CTNNB1,DRD1,NGF,NOS1,SNCA
797	GO: Biological Process	GO:0007423	sensory organ development	GeneOntologyBiologicalProcess_GO:0007423_sensory organ development	5.31099	ATP2B2,BCL2,BDNF,CTNNB1,DRD4,GRIN2B,IGF1,KCNMA1,NTF4,NTRK2,PAFAH1B1,PSEN1,SOD1,TH
798	GO: Biological Process	GO:0045986	negative regulation of smooth muscle contraction	GeneOntologyBiologicalProcess_GO:0045986_negative regulation of smooth muscle contraction	5.30867	ADORA1,ADRB2,KCNMA1,SOD1
799	GO: Biological Process	GO:0048488	synaptic vesicle endocytosis	GeneOntologyBiologicalProcess_GO:0048488_synaptic vesicle endocytosis	5.30867	CDK5,NLGN1,SNCA,SYNJ1
800	GO: Biological Process	GO:0014061	regulation of norepinephrine secretion	GeneOntologyBiologicalProcess_GO:0014061_regulation of norepinephrine secretion	5.30867	ADORA2A,AGT,AGTR2,CHRNA7
801	GO: Biological Process	GO:0032469	endoplasmic reticulum calcium ion homeostasis	GeneOntologyBiologicalProcess_GO:0032469_endoplasmic reticulum calcium ion homeostasis	5.30867	APP,BCL2,PSEN1,PSEN2
802	GO: Biological Process	GO:0033145	positive regulation of intracellular steroid hormone receptor signaling pathway	GeneOntologyBiologicalProcess_GO:0033145_positive regulation of intracellular steroid hormone receptor signaling pathway	5.30867	AR,BDNF,NTRK2,PAK1
803	GO: Biological Process	GO:0070486	leukocyte aggregation	GeneOntologyBiologicalProcess_GO:0070486_leukocyte aggregation	5.28848	ADORA2A,BCL2,BMX,BRAF,CASP3,CHRNA7,CTNNB1,IGF1,PAK1,PPP3CB,PSEN1,PSEN2,SOD1
804	GO: Biological Process	GO:0035295	tube development	GeneOntologyBiologicalProcess_GO:0035295_tube development	5.26773	ACE,AGT,AGTR2,AR,BCL2,BDNF,CASR,CTNNB1,IGF1,KRAS,NKX2-1,PAK1,PSEN1,PSEN2,TSC2
805	GO: Biological Process	GO:1901386	negative regulation of voltage-gated calcium channel activity	GeneOntologyBiologicalProcess_GO:1901386_negative regulation of voltage-gated calcium channel activity	5.24726	DRD2,DRD4,FMR1
806	GO: Biological Process	GO:0048243	norepinephrine secretion	GeneOntologyBiologicalProcess_GO:0048243_norepinephrine secretion	5.22337	ADORA2A,AGT,AGTR2,CHRNA7
808	GO: Biological Process	GO:0001991	regulation of systemic arterial blood pressure by circulatory renin-angiotensin	GeneOntologyBiologicalProcess_GO:0001991_regulation of systemic arterial blood pressure by circulatory renin-angiotensin	5.22337	ACE,ACE2,AGT,AGTR2
809	GO: Biological Process	GO:1903963	arachidonate transport	GeneOntologyBiologicalProcess_GO:1903963_arachidonate transport	5.22337	ACE,DRD2,DRD3,DRD4
810	GO: Biological Process	GO:0050482	arachidonic acid secretion	GeneOntologyBiologicalProcess_GO:0050482_arachidonic acid secretion	5.22337	ACE,DRD2,DRD3,DRD4
811	GO: Biological Process	GO:0042551	neuron maturation	GeneOntologyBiologicalProcess_GO:0042551_neuron maturation	5.22286	APP,BCL2,LRRK2,MECP2,NGF
812	GO: Biological Process	GO:0045744	negative regulation of G-protein coupled receptor protein signaling pathway	GeneOntologyBiologicalProcess_GO:0045744_negative regulation of G-protein coupled receptor protein signaling pathway	5.22286	ADRB2,DRD2,DRD3,NOS1,SNCA
813	GO: Biological Process	GO:0090276	regulation of peptide hormone secretion	GeneOntologyBiologicalProcess_GO:0090276_regulation of peptide hormone secretion	5.20481	ABAT,CASR,DRD2,GNAS,ITPR3,NOS1,PPP3CB,PRKCA,SNAP25
814	GO: Biological Process	GO:2000377	regulation of reactive oxygen species metabolic process	GeneOntologyBiologicalProcess_GO:2000377_regulation of reactive oxygen species metabolic process	5.20289	ACE2,AGT,AGTR2,BCL2,IGF1,SLC18A2,SNCA,SOD1
815	GO: Biological Process	GO:0002009	morphogenesis of an epithelium	GeneOntologyBiologicalProcess_GO:0002009_morphogenesis of an epithelium	5.18729	AGT,AGTR2,AR,BCL2,CASR,CTNNB1,DLG3,IGF1,KRAS,NKX2-1,PAFAH1B1,PAK1,PSEN1,TSC2
816	GO: Biological Process	GO:0007186	G-protein coupled receptor signaling pathway	GeneOntologyBiologicalProcess_GO:0007186_G-protein coupled receptor signaling pathway	5.16966	ADORA1,ADORA2A,ADRB2,AGT,AGTR2,APOE,BDNF,CASR,CDK5R1,DRD1,DRD2,DRD3,DRD4,DRD5,GABRA2,GNAS,GRM7,ITPR3,LRRK2,NOS1,SNCA
817	GO: Biological Process	GO:0051707	response to other organism	GeneOntologyBiologicalProcess_GO:0051707_response to other organism	5.15236	ACE,APP,BCL2,CASP3,COMT,FMR1,IGF1,NKX2-1,NOS1,PACS1,PEX13,PRKCA,SCN1A,SLC1A3,SNCA,SRR,TH,VLDLR
818	GO: Biological Process	GO:0043207	response to external biotic stimulus	GeneOntologyBiologicalProcess_GO:0043207_response to external biotic stimulus	5.15236	ACE,APP,BCL2,CASP3,COMT,FMR1,IGF1,NKX2-1,NOS1,PACS1,PEX13,PRKCA,SCN1A,SLC1A3,SNCA,SRR,TH,VLDLR
819	GO: Biological Process	GO:0014002	astrocyte development	GeneOntologyBiologicalProcess_GO:0014002_astrocyte development	5.14224	ADORA2A,AGT,DRD1,KRAS
820	GO: Biological Process	GO:0050730	regulation of peptidyl-tyrosine phosphorylation	GeneOntologyBiologicalProcess_GO:0050730_regulation of peptidyl-tyrosine phosphorylation	5.13098	ACE,ADORA1,AGT,APP,IGF1,PRKCA,PSEN1,PSEN2,RELN
821	GO: Biological Process	GO:0051480	regulation of cytosolic calcium ion concentration	GeneOntologyBiologicalProcess_GO:0051480_regulation of cytosolic calcium ion concentration	5.11996	AGT,ATP2B2,BCL2,DLG4,DRD1,DRD2,ITPR3,NGF,NOS1,SNCA
822	GO: Biological Process	GO:0021954	central nervous system neuron development	GeneOntologyBiologicalProcess_GO:0021954_central nervous system neuron development	5.11977	CDK5,DRD1,DRD2,NTRK2,PAFAH1B1,PRKCA
823	GO: Biological Process	GO:0030819	positive regulation of cAMP biosynthetic process	GeneOntologyBiologicalProcess_GO:0030819_positive regulation of cAMP biosynthetic process	5.11977	ADORA2A,ADRB2,DRD1,DRD5,GNAS,PRKCA
824	GO: Biological Process	GO:0048259	regulation of receptor-mediated endocytosis	GeneOntologyBiologicalProcess_GO:0048259_regulation of receptor-mediated endocytosis	5.11977	DLG4,DRD2,FMR1,NLGN1,PRKCA,SYNJ1
825	GO: Biological Process	GO:0006576	cellular biogenic amine metabolic process	GeneOntologyBiologicalProcess_GO:0006576_cellular biogenic amine metabolic process	5.10783	CHAT,DBH,HDC,MAOA,MECP2,PAFAH1B1,TPH2
826	GO: Biological Process	GO:0048871	multicellular organismal homeostasis	GeneOntologyBiologicalProcess_GO:0048871_multicellular organismal homeostasis	5.10659	ABAT,ADORA1,ADRB2,BCL2,CTNNB1,DBH,DRD1,DRD2,GNAS,KRAS,SOD1
827	GO: Biological Process	GO:0060560	developmental growth involved in morphogenesis	GeneOntologyBiologicalProcess_GO:0060560_developmental growth involved in morphogenesis	5.10195	APOE,APP,BDNF,CDK5,CDK5R1,MAPT,NGF,PAFAH1B1,PPP3CB
828	GO: Biological Process	GO:0046649	lymphocyte activation	GeneOntologyBiologicalProcess_GO:0046649_lymphocyte activation	5.09599	ADORA2A,BCL2,BMX,BRAF,CASP3,CHRNA4,CHRNA7,CTNNB1,IGF1,NTRK1,PAK1,PPP3CB,PSEN1,PSEN2,SOD1
829	GO: Biological Process	GO:0055114	oxidation-reduction process	GeneOntologyBiologicalProcess_GO:0055114_oxidation-reduction process	5.0923	ADH1C,BDNF,DBH,GNAS,IGF1,KCNAB1,MAOA,MECP2,MT-ND1,MT-ND3,NOS1,PEX13,SLC1A3,SNCA,SOD1,TH,TPH2,TYR
830	GO: Biological Process	GO:0008347	glial cell migration	GeneOntologyBiologicalProcess_GO:0008347_glial cell migration	5.0883	CDK5,CDK5R1,CTNNB1,PAFAH1B1,RELN
831	GO: Biological Process	GO:0051353	positive regulation of oxidoreductase activity	GeneOntologyBiologicalProcess_GO:0051353_positive regulation of oxidoreductase activity	5.0883	AGT,AGTR2,APOE,KRAS,SNCA
832	GO: Biological Process	GO:0035315	hair cell differentiation	GeneOntologyBiologicalProcess_GO:0035315_hair cell differentiation	5.0883	ATP2B2,CTNNB1,KCNMA1,PAFAH1B1,SOD1
833	GO: Biological Process	GO:0007528	neuromuscular junction development	GeneOntologyBiologicalProcess_GO:0007528_neuromuscular junction development	5.0883	APP,CHAT,LRRK2,NTRK2,PAK1
834	GO: Biological Process	GO:0043933	macromolecular complex subunit organization	GeneOntologyBiologicalProcess_GO:0043933_macromolecular complex subunit organization	5.07024	ADRB2,AGT,APOE,APP,AR,BCL2,BRAF,CHRNA4,CTNNB1,DACH1,DLG4,FMR1,GRIA1,GRIN1,GRIN2A,ITPR3,KCND2,KCNMA1,LRRK2,MAPT,MECP2,NLGN1,NOS1,PAFAH1B1,PAK1,PRKCA,PSEN2,SLC6A4,SNAP25,SNCA,SRR,SYNJ1,TSC2
835	GO: Biological Process	GO:0032891	negative regulation of organic acid transport	GeneOntologyBiologicalProcess_GO:0032891_negative regulation of organic acid transport	5.06491	ABAT,ADORA1,AGTR2,GRM7
836	GO: Biological Process	GO:0007263	nitric oxide mediated signal transduction	GeneOntologyBiologicalProcess_GO:0007263_nitric oxide mediated signal transduction	5.06491	AGT,AGTR2,APOE,NOS1
837	GO: Biological Process	GO:0018107	peptidyl-threonine phosphorylation	GeneOntologyBiologicalProcess_GO:0018107_peptidyl-threonine phosphorylation	5.0612	BCL2,CDK5,CDK5R1,DYRK1A,LRRK2,PRKCA
838	GO: Biological Process	GO:0019752	carboxylic acid metabolic process	GeneOntologyBiologicalProcess_GO:0019752_carboxylic acid metabolic process	5.05074	ABAT,ADH1C,AGT,COMT,FAAH,GAD1,HDC,IGF1,MECP2,NOS1,NPC1,PEX13,SLC1A3,SNCA,SRR,TH,TPH2,TYR
839	GO: Biological Process	GO:0002035	brain renin-angiotensin system	GeneOntologyBiologicalProcess_GO:0002035_brain renin-angiotensin system	5.04489	ACE2,AGT,AGTR2
841	GO: Biological Process	GO:0060087	relaxation of vascular smooth muscle	GeneOntologyBiologicalProcess_GO:0060087_relaxation of vascular smooth muscle	5.04489	ADORA1,KCNMA1,SOD1
842	GO: Biological Process	GO:0010578	regulation of adenylate cyclase activity involved in G-protein coupled receptor signaling pathway	GeneOntologyBiologicalProcess_GO:0010578_regulation of adenylate cyclase activity involved in G-protein coupled receptor signaling pathway	5.04489	ADORA2A,DRD1,DRD5
843	GO: Biological Process	GO:0042321	negative regulation of circadian sleep/wake cycle, sleep	GeneOntologyBiologicalProcess_GO:0042321_negative regulation of circadian sleep/wake cycle, sleep	5.04489	ADORA1,DRD1,DRD2
844	GO: Biological Process	GO:0035814	negative regulation of renal sodium excretion	GeneOntologyBiologicalProcess_GO:0035814_negative regulation of renal sodium excretion	5.04489	ADORA1,COMT,GNAS
845	GO: Biological Process	GO:0032229	negative regulation of synaptic transmission, GABAergic	GeneOntologyBiologicalProcess_GO:0032229_negative regulation of synaptic transmission, GABAergic	5.04489	ADORA1,BDNF,GRIK1
846	GO: Biological Process	GO:1903169	regulation of calcium ion transmembrane transport	GeneOntologyBiologicalProcess_GO:1903169_regulation of calcium ion transmembrane transport	5.0427	DRD1,DRD2,DRD4,FMR1,NGF,NOS1,SNCA
847	GO: Biological Process	GO:0042886	amide transport	GeneOntologyBiologicalProcess_GO:0042886_amide transport	5.04224	ABAT,ADORA1,CASR,DRD2,GNAS,ITPR3,NOS1,PPP3CB,PRKCA,SLC18A2,SNAP25
848	GO: Biological Process	GO:0046323	glucose import	GeneOntologyBiologicalProcess_GO:0046323_glucose import	5.03246	ACE,AGT,DRD1,IGF1,PRKCA,TSC2
849	GO: Biological Process	GO:0097191	extrinsic apoptotic signaling pathway	GeneOntologyBiologicalProcess_GO:0097191_extrinsic apoptotic signaling pathway	5.03056	AGT,AGTR2,AR,BCL2,CASP3,DBH,IGF1,NGF,PSEN2
850	GO: Biological Process	GO:0008202	steroid metabolic process	GeneOntologyBiologicalProcess_GO:0008202_steroid metabolic process	5.02207	AGT,APOE,APP,COMT,IGF1,KCNMA1,MECP2,NPC1,SOD1,VLDLR
851	GO: Biological Process	GO:0021782	glial cell development	GeneOntologyBiologicalProcess_GO:0021782_glial cell development	5.00409	ADORA2A,AGT,CDK5,DRD1,KRAS,SOD1
852	GO: Biological Process	GO:0031623	receptor internalization	GeneOntologyBiologicalProcess_GO:0031623_receptor internalization	5.00409	DLG4,DRD2,DRD3,FMR1,GRIA1,SNCA
853	GO: Biological Process	GO:0006469	negative regulation of protein kinase activity	GeneOntologyBiologicalProcess_GO:0006469_negative regulation of protein kinase activity	5.00248	ADORA2A,APOE,CASP3,DRD1,DRD5,PRKCA,PSEN1,PSEN2,TSC2
854	GO: Biological Process	GO:0043436	oxoacid metabolic process	GeneOntologyBiologicalProcess_GO:0043436_oxoacid metabolic process	5.00097	ABAT,ADH1C,AGT,COMT,CTNNB1,FAAH,GAD1,HDC,IGF1,MECP2,NOS1,NPC1,PEX13,SLC1A3,SNCA,SRR,TH,TPH2,TYR
855	GO: Biological Process	GO:0007176	regulation of epidermal growth factor-activated receptor activity	GeneOntologyBiologicalProcess_GO:0007176_regulation of epidermal growth factor-activated receptor activity	4.99103	ADORA1,APP,PSEN1,PSEN2
856	GO: Biological Process	GO:0007159	leukocyte cell-cell adhesion	GeneOntologyBiologicalProcess_GO:0007159_leukocyte cell-cell adhesion	4.98994	ADORA2A,BCL2,BMX,BRAF,CASP3,CHRNA7,CTNNB1,IGF1,PAK1,PPP3CB,PSEN1,PSEN2,SOD1
857	GO: Biological Process	GO:0031347	regulation of defense response	GeneOntologyBiologicalProcess_GO:0031347_regulation of defense response	4.97021	ACE,ACE2,ADORA1,ADORA2A,ADRB2,AGT,APOE,CHRNA7,DRD2,KRAS,PACS1,PAK1,PEX13,PRKCA,SCN1A,SLC1A3
858	GO: Biological Process	GO:0000302	response to reactive oxygen species	GeneOntologyBiologicalProcess_GO:0000302_response to reactive oxygen species	4.96083	APOE,BCL2,CASP3,LRRK2,NGB,NOS1,PRKCA,SNCA,SOD1
859	GO: Biological Process	GO:0015908	fatty acid transport	GeneOntologyBiologicalProcess_GO:0015908_fatty acid transport	4.94837	ACE,AGTR2,APOE,DRD2,DRD3,DRD4
860	GO: Biological Process	GO:0043266	regulation of potassium ion transport	GeneOntologyBiologicalProcess_GO:0043266_regulation of potassium ion transport	4.94837	ADORA1,ADRB2,DRD1,DRD2,KCNAB1,NOS1
861	GO: Biological Process	GO:0018210	peptidyl-threonine modification	GeneOntologyBiologicalProcess_GO:0018210_peptidyl-threonine modification	4.94837	BCL2,CDK5,CDK5R1,DYRK1A,LRRK2,PRKCA
862	GO: Biological Process	GO:0070271	protein complex biogenesis	GeneOntologyBiologicalProcess_GO:0070271_protein complex biogenesis	4.94779	ADRB2,APP,AR,BRAF,CHRNA4,CTNNB1,DLG4,GRIA1,GRIN1,GRIN2A,ITPR3,KCND2,KCNMA1,LRRK2,MAPT,NLGN1,PSEN2,SLC6A4,SNAP25,SNCA,SRR,SYNJ1,TSC2
863	GO: Biological Process	GO:0006461	protein complex assembly	GeneOntologyBiologicalProcess_GO:0006461_protein complex assembly	4.94779	ADRB2,APP,AR,BRAF,CHRNA4,CTNNB1,DLG4,GRIA1,GRIN1,GRIN2A,ITPR3,KCND2,KCNMA1,LRRK2,MAPT,NLGN1,PSEN2,SLC6A4,SNAP25,SNCA,SRR,SYNJ1,TSC2
864	GO: Biological Process	GO:0008284	positive regulation of cell proliferation	GeneOntologyBiologicalProcess_GO:0008284_positive regulation of cell proliferation	4.92623	ADRB2,AGT,AGTR2,AR,BCL2,CASR,CHRNA7,CTNNB1,DRD2,DRD3,GNAS,IGF1,KRAS,MECP2,NGF,NTRK2,PRKCA
865	GO: Biological Process	GO:0045822	negative regulation of heart contraction	GeneOntologyBiologicalProcess_GO:0045822_negative regulation of heart contraction	4.92033	ADORA1,AGTR2,NOS1,PRKCA
866	GO: Biological Process	GO:0045321	leukocyte activation	GeneOntologyBiologicalProcess_GO:0045321_leukocyte activation	4.91785	ADORA2A,BCL2,BMX,BRAF,CASP3,CHRNA4,CHRNA7,CTNNB1,IGF1,NTRK1,PAK1,PPP3CB,PSEN1,PSEN2,SNCA,SOD1
867	GO: Biological Process	GO:0009607	response to biotic stimulus	GeneOntologyBiologicalProcess_GO:0009607_response to biotic stimulus	4.91118	ACE,APP,BCL2,CASP3,COMT,FMR1,IGF1,NKX2-1,NOS1,PACS1,PEX13,PRKCA,SCN1A,SLC1A3,SNCA,SRR,TH,VLDLR
868	GO: Biological Process	GO:0006082	organic acid metabolic process	GeneOntologyBiologicalProcess_GO:0006082_organic acid metabolic process	4.90807	ABAT,ADH1C,AGT,COMT,CTNNB1,FAAH,GAD1,HDC,IGF1,MECP2,NOS1,NPC1,PEX13,SLC1A3,SNCA,SRR,TH,TPH2,TYR
869	GO: Biological Process	GO:0071375	cellular response to peptide hormone stimulus	GeneOntologyBiologicalProcess_GO:0071375_cellular response to peptide hormone stimulus	4.90376	AGT,AGTR2,CTNNB1,DRD1,GNAS,IGF1,PAK1,PRKCA,TSC2,VLDLR
870	GO: Biological Process	GO:0033238	regulation of cellular amine metabolic process	GeneOntologyBiologicalProcess_GO:0033238_regulation of cellular amine metabolic process	4.86728	ABAT,COMT,DRD1,DRD4,SLC6A3,SNCA
871	GO: Biological Process	GO:0030816	positive regulation of cAMP metabolic process	GeneOntologyBiologicalProcess_GO:0030816_positive regulation of cAMP metabolic process	4.86728	ADORA2A,ADRB2,DRD1,DRD5,GNAS,PRKCA
872	GO: Biological Process	GO:0006520	cellular amino acid metabolic process	GeneOntologyBiologicalProcess_GO:0006520_cellular amino acid metabolic process	4.85623	ABAT,COMT,GAD1,HDC,MECP2,NOS1,SLC1A3,SRR,TH,TPH2,TYR
873	GO: Biological Process	GO:0042430	indole-containing compound metabolic process	GeneOntologyBiologicalProcess_GO:0042430_indole-containing compound metabolic process	4.85254	ATP2B2,GRIN2A,MAOA,TPH2
874	GO: Biological Process	GO:0045745	positive regulation of G-protein coupled receptor protein signaling pathway	GeneOntologyBiologicalProcess_GO:0045745_positive regulation of G-protein coupled receptor protein signaling pathway	4.85254	DRD2,DRD3,LRRK2,NOS1
875	GO: Biological Process	GO:0017158	regulation of calcium ion-dependent exocytosis	GeneOntologyBiologicalProcess_GO:0017158_regulation of calcium ion-dependent exocytosis	4.84088	BRAF,CDK5,FMR1,LRRK2,NLGN1,SYN1
876	GO: Biological Process	GO:2000177	regulation of neural precursor cell proliferation	GeneOntologyBiologicalProcess_GO:2000177_regulation of neural precursor cell proliferation	4.84088	BDNF,CTNNB1,DRD2,IGF1,LRRK2,SLC6A4
877	GO: Biological Process	GO:0065003	macromolecular complex assembly	GeneOntologyBiologicalProcess_GO:0065003_macromolecular complex assembly	4.8242	ADRB2,APOE,APP,AR,BRAF,CHRNA4,CTNNB1,DACH1,DLG4,GRIA1,GRIN1,GRIN2A,ITPR3,KCND2,KCNMA1,LRRK2,MAPT,NLGN1,PSEN2,SLC6A4,SNAP25,SNCA,SRR,SYNJ1,TSC2
878	GO: Biological Process	GO:0050818	regulation of coagulation	GeneOntologyBiologicalProcess_GO:0050818_regulation of coagulation	4.81479	ABAT,ADRB2,APOE,PRKCA,PSEN1,PSEN2
879	GO: Biological Process	GO:0071396	cellular response to lipid	GeneOntologyBiologicalProcess_GO:0071396_cellular response to lipid	4.79279	AGTR2,AR,BDNF,CTNNB1,GNAS,IGF1,MT-ND3,NPC1,NTRK2,PAK1,PRKCA,SLC6A4,VLDLR
880	GO: Biological Process	GO:0071875	adrenergic receptor signaling pathway	GeneOntologyBiologicalProcess_GO:0071875_adrenergic receptor signaling pathway	4.78744	ADRB2,DRD2,GNAS,NOS1
881	GO: Biological Process	GO:0046683	response to organophosphorus	GeneOntologyBiologicalProcess_GO:0046683_response to organophosphorus	4.77833	APP,BRAF,ITPR3,SLC6A3,SLC6A4,SOD1,TYR
882	GO: Biological Process	GO:1902532	negative regulation of intracellular signal transduction	GeneOntologyBiologicalProcess_GO:1902532_negative regulation of intracellular signal transduction	4.77472	ACE2,APOE,BCL2,DRD2,DRD3,DYRK1A,IGF1,LRRK2,PAFAH1B1,PRKCA,TSC2,WWC1
883	GO: Biological Process	GO:0001974	blood vessel remodeling	GeneOntologyBiologicalProcess_GO:0001974_blood vessel remodeling	4.76853	ACE,AGT,AGTR2,DBH,IGF1
884	GO: Biological Process	GO:0015909	long-chain fatty acid transport	GeneOntologyBiologicalProcess_GO:0015909_long-chain fatty acid transport	4.76853	ACE,APOE,DRD2,DRD3,DRD4
885	GO: Biological Process	GO:0045926	negative regulation of growth	GeneOntologyBiologicalProcess_GO:0045926_negative regulation of growth	4.73527	ADRB2,AGT,AGTR2,BCL2,CDK5,CDK5R1,GNAS,SLC6A4,WWC1
886	GO: Biological Process	GO:0019953	sexual reproduction	GeneOntologyBiologicalProcess_GO:0019953_sexual reproduction	4.73349	ABAT,ACE,AGT,APP,AR,BCL2,CTNNB1,DRD1,DRD4,DRD5,GRIN1,IGF1,PAFAH1B1,SLC6A4,SOD1,TH
887	GO: Biological Process	GO:0060688	regulation of morphogenesis of a branching structure	GeneOntologyBiologicalProcess_GO:0060688_regulation of morphogenesis of a branching structure	4.73197	AGT,AGTR2,AR,CTNNB1,LRRK2
888	GO: Biological Process	GO:0007620	copulation	GeneOntologyBiologicalProcess_GO:0007620_copulation	4.72483	ABAT,AR,DRD4,SLC6A4
889	GO: Biological Process	GO:1901653	cellular response to peptide	GeneOntologyBiologicalProcess_GO:1901653_cellular response to peptide	4.72322	AGT,AGTR2,CTNNB1,DRD1,GNAS,IGF1,PAK1,PRKCA,TSC2,VLDLR
890	GO: Biological Process	GO:0060402	calcium ion transport into cytosol	GeneOntologyBiologicalProcess_GO:0060402_calcium ion transport into cytosol	4.72107	BCL2,DRD1,DRD2,ITPR3,NGF,NOS1,SNCA
892	GO: Biological Process	GO:0071287	cellular response to manganese ion	GeneOntologyBiologicalProcess_GO:0071287_cellular response to manganese ion	4.7174	GRIN1,LRRK2,TH
893	GO: Biological Process	GO:1900452	regulation of long term synaptic depression	GeneOntologyBiologicalProcess_GO:1900452_regulation of long term synaptic depression	4.7174	ADORA1,FMR1,MAPT
895	GO: Biological Process	GO:0044557	relaxation of smooth muscle	GeneOntologyBiologicalProcess_GO:0044557_relaxation of smooth muscle	4.7174	ADORA1,KCNMA1,SOD1
896	GO: Biological Process	GO:0030432	peristalsis	GeneOntologyBiologicalProcess_GO:0030432_peristalsis	4.7174	AGT,DRD1,DRD2
897	GO: Biological Process	GO:0060401	cytosolic calcium ion transport	GeneOntologyBiologicalProcess_GO:0060401_cytosolic calcium ion transport	4.68361	BCL2,DRD1,DRD2,ITPR3,NGF,NOS1,SNCA
898	GO: Biological Process	GO:0051291	protein heterooligomerization	GeneOntologyBiologicalProcess_GO:0051291_protein heterooligomerization	4.68361	BRAF,CHRNA4,CTNNB1,ITPR3,KCND2,NLGN1,TSC2
899	GO: Biological Process	GO:0048015	phosphatidylinositol-mediated signaling	GeneOntologyBiologicalProcess_GO:0048015_phosphatidylinositol-mediated signaling	4.67773	AGT,IGF1,NGF,NTRK1,NTRK2,RELN,SYNJ1,TSC2
900	GO: Biological Process	GO:0016236	macroautophagy	GeneOntologyBiologicalProcess_GO:0016236_macroautophagy	4.67055	ADRB2,CASP3,CDK5,CDK5R1,LRRK2,NPC1,PEX13,PSEN1,SCN1A,SLC1A3,TSC2
901	GO: Biological Process	GO:0051099	positive regulation of binding	GeneOntologyBiologicalProcess_GO:0051099_positive regulation of binding	4.66509	ACE,CDK5,FMR1,IGF1,LRRK2,NGF,PACS1
902	GO: Biological Process	GO:0045932	negative regulation of muscle contraction	GeneOntologyBiologicalProcess_GO:0045932_negative regulation of muscle contraction	4.66452	ADORA1,ADRB2,KCNMA1,SOD1
903	GO: Biological Process	GO:0071695	anatomical structure maturation	GeneOntologyBiologicalProcess_GO:0071695_anatomical structure maturation	4.66084	CDK5R1,GRIN1,IGF1,PSEN1,PSEN2
904	GO: Biological Process	GO:0007405	neuroblast proliferation	GeneOntologyBiologicalProcess_GO:0007405_neuroblast proliferation	4.66084	BDNF,CTNNB1,DRD2,LRRK2,PAFAH1B1
905	GO: Biological Process	GO:0033673	negative regulation of kinase activity	GeneOntologyBiologicalProcess_GO:0033673_negative regulation of kinase activity	4.65961	ADORA2A,APOE,CASP3,DRD1,DRD5,PRKCA,PSEN1,PSEN2,TSC2
906	GO: Biological Process	GO:0048017	inositol lipid-mediated signaling	GeneOntologyBiologicalProcess_GO:0048017_inositol lipid-mediated signaling	4.63328	AGT,IGF1,NGF,NTRK1,NTRK2,RELN,SYNJ1,TSC2
907	GO: Biological Process	GO:0048640	negative regulation of developmental growth	GeneOntologyBiologicalProcess_GO:0048640_negative regulation of developmental growth	4.61627	ADRB2,CDK5,CDK5R1,GNAS,SLC6A4,WWC1
908	GO: Biological Process	GO:0051899	membrane depolarization	GeneOntologyBiologicalProcess_GO:0051899_membrane depolarization	4.61627	ADORA2A,BCL2,CHRNA4,GRIK1,LRRK2,SCN1A
909	GO: Biological Process	GO:0071822	protein complex subunit organization	GeneOntologyBiologicalProcess_GO:0071822_protein complex subunit organization	4.59957	ADRB2,APP,AR,BCL2,BRAF,CHRNA4,CTNNB1,DLG4,GRIA1,GRIN1,GRIN2A,ITPR3,KCND2,KCNMA1,LRRK2,MAPT,NLGN1,PAFAH1B1,PAK1,PSEN2,SLC6A4,SNAP25,SNCA,SRR,SYNJ1,TSC2
910	GO: Biological Process	GO:0007204	positive regulation of cytosolic calcium ion concentration	GeneOntologyBiologicalProcess_GO:0007204_positive regulation of cytosolic calcium ion concentration	4.59803	AGT,BCL2,DLG4,DRD1,DRD2,ITPR3,NGF,NOS1,SNCA
911	GO: Biological Process	GO:0009581	detection of external stimulus	GeneOntologyBiologicalProcess_GO:0009581_detection of external stimulus	4.59236	ADORA1,ATP2B2,GRIN2A,GRIN2B,GRIN2D,IGF1,NTRK1
912	GO: Biological Process	GO:0045893	positive regulation of transcription, DNA-templated	GeneOntologyBiologicalProcess_GO:0045893_positive regulation of transcription, DNA-templated	4.58804	ADRB2,AGT,AGTR2,APP,AR,BDNF,CTNNB1,DRD2,DRD3,GRIN1,IGF1,KRAS,MECP2,NGF,NKX2-1,NOS1,NTRK1,PBX3,PPP3CB,PSEN1,RELN,TSC2
913	GO: Biological Process	GO:1903508	positive regulation of nucleic acid-templated transcription	GeneOntologyBiologicalProcess_GO:1903508_positive regulation of nucleic acid-templated transcription	4.58804	ADRB2,AGT,AGTR2,APP,AR,BDNF,CTNNB1,DRD2,DRD3,GRIN1,IGF1,KRAS,MECP2,NGF,NKX2-1,NOS1,NTRK1,PBX3,PPP3CB,PSEN1,RELN,TSC2
914	GO: Biological Process	GO:0051386	regulation of neurotrophin TRK receptor signaling pathway	GeneOntologyBiologicalProcess_GO:0051386_regulation of neurotrophin TRK receptor signaling pathway	4.58085	AGT,AGTR2,NGF
915	GO: Biological Process	GO:0002003	angiotensin maturation	GeneOntologyBiologicalProcess_GO:0002003_angiotensin maturation	4.58085	ACE,ACE2,AGT
916	GO: Biological Process	GO:0014041	regulation of neuron maturation	GeneOntologyBiologicalProcess_GO:0014041_regulation of neuron maturation	4.58085	BCL2,LRRK2,NGF
917	GO: Biological Process	GO:0007614	short-term memory	GeneOntologyBiologicalProcess_GO:0007614_short-term memory	4.58085	COMT,DRD4,GRM7
918	GO: Biological Process	GO:0034776	response to histamine	GeneOntologyBiologicalProcess_GO:0034776_response to histamine	4.58085	DRD2,DRD3,DRD4
919	GO: Biological Process	GO:0016241	regulation of macroautophagy	GeneOntologyBiologicalProcess_GO:0016241_regulation of macroautophagy	4.55678	ADRB2,CASP3,CDK5,CDK5R1,LRRK2,NPC1,TSC2
920	GO: Biological Process	GO:1902692	regulation of neuroblast proliferation	GeneOntologyBiologicalProcess_GO:1902692_regulation of neuroblast proliferation	4.55022	BDNF,CTNNB1,DRD2,LRRK2
921	GO: Biological Process	GO:0045920	negative regulation of exocytosis	GeneOntologyBiologicalProcess_GO:0045920_negative regulation of exocytosis	4.55022	BRAF,FMR1,IL1RAPL1,SNCA
922	GO: Biological Process	GO:0016486	peptide hormone processing	GeneOntologyBiologicalProcess_GO:0016486_peptide hormone processing	4.55022	ACE,ACE2,AGT,NGF
923	GO: Biological Process	GO:0006814	sodium ion transport	GeneOntologyBiologicalProcess_GO:0006814_sodium ion transport	4.54651	ADRB2,AGT,DRD2,DRD3,DRD4,GNAS,NOS1,SCN1A
924	GO: Biological Process	GO:0009582	detection of abiotic stimulus	GeneOntologyBiologicalProcess_GO:0009582_detection of abiotic stimulus	4.53918	ADORA1,ATP2B2,GRIN2A,GRIN2B,GRIN2D,IGF1,NTRK1
925	GO: Biological Process	GO:1900453	negative regulation of long term synaptic depression	GeneOntologyBiologicalProcess_GO:1900453_negative regulation of long term synaptic depression	4.51626	ADORA1,FMR1
926	GO: Biological Process	GO:0046960	sensitization	GeneOntologyBiologicalProcess_GO:0046960_sensitization	4.51626	DRD1,DRD5
927	GO: Biological Process	GO:0061193	taste bud development	GeneOntologyBiologicalProcess_GO:0061193_taste bud development	4.51626	BDNF,NTF4
928	GO: Biological Process	GO:0051563	smooth endoplasmic reticulum calcium ion homeostasis	GeneOntologyBiologicalProcess_GO:0051563_smooth endoplasmic reticulum calcium ion homeostasis	4.51626	APP,PSEN1
929	GO: Biological Process	GO:1902680	positive regulation of RNA biosynthetic process	GeneOntologyBiologicalProcess_GO:1902680_positive regulation of RNA biosynthetic process	4.51011	ADRB2,AGT,AGTR2,APP,AR,BDNF,CTNNB1,DRD2,DRD3,GRIN1,IGF1,KRAS,MECP2,NGF,NKX2-1,NOS1,NTRK1,PBX3,PPP3CB,PSEN1,RELN,TSC2
930	GO: Biological Process	GO:0032387	negative regulation of intracellular transport	GeneOntologyBiologicalProcess_GO:0032387_negative regulation of intracellular transport	4.50436	BCL2,BRAF,CDK5,FMR1,LRRK2,MAPT,NOS1
931	GO: Biological Process	GO:0071383	cellular response to steroid hormone stimulus	GeneOntologyBiologicalProcess_GO:0071383_cellular response to steroid hormone stimulus	4.47867	AGTR2,AR,BDNF,CTNNB1,IGF1,MT-ND3,NPC1,NTRK2,PAK1
932	GO: Biological Process	GO:0010468	regulation of gene expression	GeneOntologyBiologicalProcess_GO:0010468_regulation of gene expression	4.47022	ACE,ADORA2A,ADRB2,AGT,AGTR2,APOE,APP,AR,BCL2,BDNF,BRAF,CASR,CDK5,CDK5R1,CTNNB1,DACH1,DRD2,DRD3,DYRK1A,FMR1,GNAS,GRIN1,IGF1,KRAS,LRRK2,MECP2,NGF,NKX2-1,NOS1,NTRK1,NTRK2,PAK1,PBX3,PPP3CB,PRKCA,PSEN1,PSEN2,RELN,SLC6A4,SNCA,TSC2,VLDLR,WWC1
933	GO: Biological Process	GO:0019722	calcium-mediated signaling	GeneOntologyBiologicalProcess_GO:0019722_calcium-mediated signaling	4.47002	DRD1,DRD4,IGF1,LRRK2,NOS1,NTRK2,PPP3CB
934	GO: Biological Process	GO:0007605	sensory perception of sound	GeneOntologyBiologicalProcess_GO:0007605_sensory perception of sound	4.47002	ATP2B2,CASP3,GRM7,KCNMA1,SLC1A3,SOD1,TH
935	GO: Biological Process	GO:1903779	regulation of cardiac conduction	GeneOntologyBiologicalProcess_GO:1903779_regulation of cardiac conduction	4.46182	ACE2,AGT,ATP2B2,ITPR3,NOS1
936	GO: Biological Process	GO:1901565	organonitrogen compound catabolic process	GeneOntologyBiologicalProcess_GO:1901565_organonitrogen compound catabolic process	4.4606	ABAT,ACE,ACE2,COMT,DBH,GAD1,HDC,MAOA,NOS1,SLC6A3
937	GO: Biological Process	GO:0021892	cerebral cortex GABAergic interneuron differentiation	GeneOntologyBiologicalProcess_GO:0021892_cerebral cortex GABAergic interneuron differentiation	4.45766	DRD1,DRD2,NKX2-1
938	GO: Biological Process	GO:0016264	gap junction assembly	GeneOntologyBiologicalProcess_GO:0016264_gap junction assembly	4.45766	ACE,ACE2,AGT
939	GO: Biological Process	GO:0031987	locomotion involved in locomotory behavior	GeneOntologyBiologicalProcess_GO:0031987_locomotion involved in locomotory behavior	4.45766	DRD2,DRD3,PPP3CB
940	GO: Biological Process	GO:0021549	cerebellum development	GeneOntologyBiologicalProcess_GO:0021549_cerebellum development	4.45598	ABAT,AGTR2,ATP2B2,CDK5,CDK5R1,MECP2
941	GO: Biological Process	GO:0072091	regulation of stem cell proliferation	GeneOntologyBiologicalProcess_GO:0072091_regulation of stem cell proliferation	4.45598	ACE,BDNF,CTNNB1,DRD2,LRRK2,NGF
942	GO: Biological Process	GO:0045861	negative regulation of proteolysis	GeneOntologyBiologicalProcess_GO:0045861_negative regulation of proteolysis	4.45055	ADORA2A,AGT,APP,CDK5,IGF1,LRRK2,NGF,PSEN1,PSEN2,SNCA
943	GO: Biological Process	GO:0001558	regulation of cell growth	GeneOntologyBiologicalProcess_GO:0001558_regulation of cell growth	4.45016	AGT,AGTR2,APOE,BCL2,BDNF,CDK5,CDK5R1,IGF1,MAPT,NGF,PAFAH1B1
945	GO: Biological Process	GO:0001941	postsynaptic membrane organization	GeneOntologyBiologicalProcess_GO:0001941_postsynaptic membrane organization	4.44344	APOE,DLG4,NLGN1,RELN
946	GO: Biological Process	GO:0030100	regulation of endocytosis	GeneOntologyBiologicalProcess_GO:0030100_regulation of endocytosis	4.43502	DLG4,DRD2,FMR1,NLGN1,PRKCA,SNCA,SYNJ1,TSC2
947	GO: Biological Process	GO:0002521	leukocyte differentiation	GeneOntologyBiologicalProcess_GO:0002521_leukocyte differentiation	4.42468	BCL2,BMX,BRAF,CTNNB1,GNAS,NTRK1,PAFAH1B1,PPP3CB,PRKCA,PSEN1,PSEN2,SOD1
948	GO: Biological Process	GO:0045665	negative regulation of neuron differentiation	GeneOntologyBiologicalProcess_GO:0045665_negative regulation of neuron differentiation	4.42141	APOE,APP,CDK5,CDK5R1,NLGN1,PAFAH1B1,PSEN1,SLC6A4
949	GO: Biological Process	GO:0015758	glucose transport	GeneOntologyBiologicalProcess_GO:0015758_glucose transport	4.41941	ACE,AGT,BRAF,DRD1,IGF1,PRKCA,TSC2
950	GO: Biological Process	GO:0061351	neural precursor cell proliferation	GeneOntologyBiologicalProcess_GO:0061351_neural precursor cell proliferation	4.41941	BDNF,CTNNB1,DRD2,IGF1,LRRK2,PAFAH1B1,SLC6A4
951	GO: Biological Process	GO:0006940	regulation of smooth muscle contraction	GeneOntologyBiologicalProcess_GO:0006940_regulation of smooth muscle contraction	4.39978	ABAT,ADORA1,ADRB2,KCNMA1,SOD1
952	GO: Biological Process	GO:0010543	regulation of platelet activation	GeneOntologyBiologicalProcess_GO:0010543_regulation of platelet activation	4.39257	ABAT,ADRB2,APOE,PRKCA
953	GO: Biological Process	GO:0008645	hexose transport	GeneOntologyBiologicalProcess_GO:0008645_hexose transport	4.38624	ACE,AGT,BRAF,DRD1,IGF1,PRKCA,TSC2
954	GO: Biological Process	GO:0072089	stem cell proliferation	GeneOntologyBiologicalProcess_GO:0072089_stem cell proliferation	4.38624	ACE,BDNF,CTNNB1,DRD2,LRRK2,NGF,PAFAH1B1
955	GO: Biological Process	GO:1901362	organic cyclic compound biosynthetic process	GeneOntologyBiologicalProcess_GO:1901362_organic cyclic compound biosynthetic process	4.38338	ADORA2A,ADRB2,AGT,AGTR2,APOE,APP,AR,BDNF,CDK5,CDK5R1,CTNNB1,DACH1,DBH,DRD1,DRD2,DRD3,DRD4,DRD5,GNAS,GRIN1,GRM7,HDC,IGF1,KRAS,MECP2,NGF,NKX2-1,NOS1,NTRK1,PBX3,PPP3CB,PRKCA,PSEN1,PSEN2,RELN,SLC6A3,SNCA,SOD1,TH,TPH2,TSC2,TYR,VLDLR,WWC1
956	GO: Biological Process	GO:0050878	regulation of body fluid levels	GeneOntologyBiologicalProcess_GO:0050878_regulation of body fluid levels	4.37752	ABAT,ADORA1,ADORA2A,ADRB2,APOE,ATP2B2,DRD2,GNAS,ITPR3,KCNMA1,PRKCA,SLC6A3
957	GO: Biological Process	GO:0006605	protein targeting	GeneOntologyBiologicalProcess_GO:0006605_protein targeting	4.35887	ADORA1,AGT,AGTR2,CDK5,CDK5R1,CTNNB1,DRD1,IGF1,LRRK2,NLGN1,PACS1,PEX13,PPP3CB,TSC2
958	GO: Biological Process	GO:0043406	positive regulation of MAP kinase activity	GeneOntologyBiologicalProcess_GO:0043406_positive regulation of MAP kinase activity	4.35437	CHRNA7,DRD4,IGF1,KRAS,LRRK2,PAK1,PSEN1,SOD1
959	GO: Biological Process	GO:0030307	positive regulation of cell growth	GeneOntologyBiologicalProcess_GO:0030307_positive regulation of cell growth	4.35351	APOE,BCL2,BDNF,IGF1,MAPT,NGF,PAFAH1B1
960	GO: Biological Process	GO:0015749	monosaccharide transport	GeneOntologyBiologicalProcess_GO:0015749_monosaccharide transport	4.35351	ACE,AGT,BRAF,DRD1,IGF1,PRKCA,TSC2
961	GO: Biological Process	GO:0021548	pons development	GeneOntologyBiologicalProcess_GO:0021548_pons development	4.34546	BCL2,CDK5R1,GRIN1
962	GO: Biological Process	GO:0002002	regulation of angiotensin levels in blood	GeneOntologyBiologicalProcess_GO:0002002_regulation of angiotensin levels in blood	4.34546	ACE,ACE2,AGT
963	GO: Biological Process	GO:0040019	positive regulation of embryonic development	GeneOntologyBiologicalProcess_GO:0040019_positive regulation of embryonic development	4.34327	AR,CTNNB1,IGF1,PAFAH1B1
964	GO: Biological Process	GO:2001258	negative regulation of cation channel activity	GeneOntologyBiologicalProcess_GO:2001258_negative regulation of cation channel activity	4.34327	DRD2,DRD4,FMR1,KCNAB1
965	GO: Biological Process	GO:0032535	regulation of cellular component size	GeneOntologyBiologicalProcess_GO:0032535_regulation of cellular component size	4.34215	APOE,ATP2B2,BDNF,CDK5,CDK5R1,KCNMA1,MAPT,NGF,PAFAH1B1,TSC2
966	GO: Biological Process	GO:0048708	astrocyte differentiation	GeneOntologyBiologicalProcess_GO:0048708_astrocyte differentiation	4.33968	ADORA2A,AGT,DRD1,KRAS,MECP2
967	GO: Biological Process	GO:0019438	aromatic compound biosynthetic process	GeneOntologyBiologicalProcess_GO:0019438_aromatic compound biosynthetic process	4.33092	ADORA2A,ADRB2,AGT,AGTR2,APOE,APP,AR,BDNF,CDK5,CDK5R1,CTNNB1,DACH1,DBH,DRD1,DRD2,DRD3,DRD4,DRD5,GNAS,GRIN1,GRM7,HDC,IGF1,KRAS,MECP2,NGF,NKX2-1,NOS1,NTRK1,PBX3,PPP3CB,PRKCA,PSEN1,PSEN2,RELN,SLC6A3,SNCA,TH,TPH2,TSC2,TYR,VLDLR,WWC1
968	GO: Biological Process	GO:0051254	positive regulation of RNA metabolic process	GeneOntologyBiologicalProcess_GO:0051254_positive regulation of RNA metabolic process	4.31285	ADRB2,AGT,AGTR2,APP,AR,BDNF,CTNNB1,DRD2,DRD3,GRIN1,IGF1,KRAS,MECP2,NGF,NKX2-1,NOS1,NTRK1,PBX3,PPP3CB,PSEN1,RELN,TSC2
969	GO: Biological Process	GO:0033143	regulation of intracellular steroid hormone receptor signaling pathway	GeneOntologyBiologicalProcess_GO:0033143_regulation of intracellular steroid hormone receptor signaling pathway	4.31032	AR,BDNF,IGF1,NTRK2,PAK1
970	GO: Biological Process	GO:2001236	regulation of extrinsic apoptotic signaling pathway	GeneOntologyBiologicalProcess_GO:2001236_regulation of extrinsic apoptotic signaling pathway	4.30524	AGT,AGTR2,AR,BCL2,DBH,IGF1,PSEN2
971	GO: Biological Process	GO:0009895	negative regulation of catabolic process	GeneOntologyBiologicalProcess_GO:0009895_negative regulation of catabolic process	4.289	ADORA1,BCL2,GRIN2A,LRRK2,NPC1,PSEN1,PSEN2,SNCA
972	GO: Biological Process	GO:0050865	regulation of cell activation	GeneOntologyBiologicalProcess_GO:0050865_regulation of cell activation	4.28517	ABAT,ADORA2A,ADRB2,APOE,BCL2,CASP3,CTNNB1,IGF1,PAK1,PRKCA,SNCA,SOD1
974	GO: Biological Process	GO:0051283	negative regulation of sequestering of calcium ion	GeneOntologyBiologicalProcess_GO:0051283_negative regulation of sequestering of calcium ion	4.26568	DRD1,DRD2,ITPR3,NGF,NOS1,SNCA
975	GO: Biological Process	GO:0051209	release of sequestered calcium ion into cytosol	GeneOntologyBiologicalProcess_GO:0051209_release of sequestered calcium ion into cytosol	4.26568	DRD1,DRD2,ITPR3,NGF,NOS1,SNCA
976	GO: Biological Process	GO:0007548	sex differentiation	GeneOntologyBiologicalProcess_GO:0007548_sex differentiation	4.2648	AGT,AR,BCL2,CHAT,CTNNB1,DACH1,NKX2-1,NTRK1,SOD1
977	GO: Biological Process	GO:0048469	cell maturation	GeneOntologyBiologicalProcess_GO:0048469_cell maturation	4.25792	APP,BCL2,CTNNB1,KCNMA1,LRRK2,MECP2,NGF
978	GO: Biological Process	GO:0007411	axon guidance	GeneOntologyBiologicalProcess_GO:0007411_axon guidance	4.25054	APP,BDNF,CDK5,CDK5R1,KRAS,NKX2-1,NTRK1,RELN
979	GO: Biological Process	GO:1990090	cellular response to nerve growth factor stimulus	GeneOntologyBiologicalProcess_GO:1990090_cellular response to nerve growth factor stimulus	4.24896	APP,NGF,NTRK1,NTRK2
980	GO: Biological Process	GO:0051282	regulation of sequestering of calcium ion	GeneOntologyBiologicalProcess_GO:0051282_regulation of sequestering of calcium ion	4.24553	DRD1,DRD2,ITPR3,NGF,NOS1,SNCA
981	GO: Biological Process	GO:0035641	locomotory exploration behavior	GeneOntologyBiologicalProcess_GO:0035641_locomotory exploration behavior	4.24248	DLG4,GAD1,LRRK2
982	GO: Biological Process	GO:0060177	regulation of angiotensin metabolic process	GeneOntologyBiologicalProcess_GO:0060177_regulation of angiotensin metabolic process	4.24248	ACE,ACE2,AGT
983	GO: Biological Process	GO:0097485	neuron projection guidance	GeneOntologyBiologicalProcess_GO:0097485_neuron projection guidance	4.23785	APP,BDNF,CDK5,CDK5R1,KRAS,NKX2-1,NTRK1,RELN
985	GO: Biological Process	GO:0097553	calcium ion transmembrane import into cytosol	GeneOntologyBiologicalProcess_GO:0097553_calcium ion transmembrane import into cytosol	4.22556	DRD1,DRD2,ITPR3,NGF,NOS1,SNCA
986	GO: Biological Process	GO:1902656	calcium ion import into cytosol	GeneOntologyBiologicalProcess_GO:1902656_calcium ion import into cytosol	4.22556	DRD1,DRD2,ITPR3,NGF,NOS1,SNCA
987	GO: Biological Process	GO:0014897	striated muscle hypertrophy	GeneOntologyBiologicalProcess_GO:0014897_striated muscle hypertrophy	4.22486	AGT,AGTR2,AR,IGF1,PRKCA
988	GO: Biological Process	GO:1903034	regulation of response to wounding	GeneOntologyBiologicalProcess_GO:1903034_regulation of response to wounding	4.21917	ABAT,ACE,ACE2,ADORA1,ADORA2A,ADRB2,AGT,APOE,BRAF,CHRNA7,PRKCA
989	GO: Biological Process	GO:0021675	nerve development	GeneOntologyBiologicalProcess_GO:0021675_nerve development	4.1972	BDNF,CTNNB1,NTF4,NTRK1,SLC1A3
991	GO: Biological Process	GO:0051208	sequestering of calcium ion	GeneOntologyBiologicalProcess_GO:0051208_sequestering of calcium ion	4.18616	DRD1,DRD2,ITPR3,NGF,NOS1,SNCA
992	GO: Biological Process	GO:0048771	tissue remodeling	GeneOntologyBiologicalProcess_GO:0048771_tissue remodeling	4.18106	ACE,ADRB2,AGT,AGTR2,CTNNB1,DBH,IGF1
993	GO: Biological Process	GO:0014896	muscle hypertrophy	GeneOntologyBiologicalProcess_GO:0014896_muscle hypertrophy	4.16994	AGT,AGTR2,AR,IGF1,PRKCA
994	GO: Biological Process	GO:0032388	positive regulation of intracellular transport	GeneOntologyBiologicalProcess_GO:0032388_positive regulation of intracellular transport	4.16372	BCL2,CDK5,CDK5R1,DRD1,FMR1,IGF1,NLGN1,PPP3CB,SNCA,SYNJ1
995	GO: Biological Process	GO:0051091	positive regulation of DNA binding transcription factor activity	GeneOntologyBiologicalProcess_GO:0051091_positive regulation of DNA binding transcription factor activity	4.16296	AGT,AR,BDNF,CTNNB1,KRAS,NGF,NTRK1,RELN
996	GO: Biological Process	GO:0061098	positive regulation of protein tyrosine kinase activity	GeneOntologyBiologicalProcess_GO:0061098_positive regulation of protein tyrosine kinase activity	4.15989	ACE,ADORA1,AGT,RELN
997	GO: Biological Process	GO:0051592	response to calcium ion	GeneOntologyBiologicalProcess_GO:0051592_response to calcium ion	4.14747	BRAF,CASR,GRIN1,ITPR3,KCNMA1,TPH2
998	GO: Biological Process	GO:0001921	positive regulation of receptor recycling	GeneOntologyBiologicalProcess_GO:0001921_positive regulation of receptor recycling	4.14732	PSEN1,PSEN2,SNCA
999	GO: Biological Process	GO:0097154	GABAergic neuron differentiation	GeneOntologyBiologicalProcess_GO:0097154_GABAergic neuron differentiation	4.14732	DRD1,DRD2,NKX2-1
1000	GO: Biological Process	GO:0097090	presynaptic membrane organization	GeneOntologyBiologicalProcess_GO:0097090_presynaptic membrane organization	4.14732	APOE,IL1RAPL1,NLGN1
1001	GO: Biological Process	GO:0051956	negative regulation of amino acid transport	GeneOntologyBiologicalProcess_GO:0051956_negative regulation of amino acid transport	4.14732	ABAT,ADORA1,GRM7
1002	GO: Biological Process	GO:0032104	regulation of response to extracellular stimulus	GeneOntologyBiologicalProcess_GO:0032104_regulation of response to extracellular stimulus	4.1361	ADRB2,CASP3,CDK5,CDK5R1,LRRK2,NPC1,TSC2
1003	GO: Biological Process	GO:0032107	regulation of response to nutrient levels	GeneOntologyBiologicalProcess_GO:0032107_regulation of response to nutrient levels	4.1361	ADRB2,CASP3,CDK5,CDK5R1,LRRK2,NPC1,TSC2
1004	GO: Biological Process	GO:0040018	positive regulation of multicellular organism growth	GeneOntologyBiologicalProcess_GO:0040018_positive regulation of multicellular organism growth	4.11715	AGT,BCL2,DRD2,SLC6A3
1005	GO: Biological Process	GO:1990089	response to nerve growth factor	GeneOntologyBiologicalProcess_GO:1990089_response to nerve growth factor	4.11715	APP,NGF,NTRK1,NTRK2
1006	GO: Biological Process	GO:0048729	tissue morphogenesis	GeneOntologyBiologicalProcess_GO:0048729_tissue morphogenesis	4.11377	AGT,AGTR2,AR,BCL2,CASR,CTNNB1,DLG3,IGF1,KRAS,NKX2-1,PAFAH1B1,PAK1,PSEN1,TSC2
1007	GO: Biological Process	GO:0034109	homotypic cell-cell adhesion	GeneOntologyBiologicalProcess_GO:0034109_homotypic cell-cell adhesion	4.10954	ABAT,ADORA2A,ADRB2,CASP3,CTNNB1,GNAS,IGF1,PAK1,PRKCA,SOD1
1008	GO: Biological Process	GO:0006869	lipid transport	GeneOntologyBiologicalProcess_GO:0006869_lipid transport	4.10677	ACE,AGT,AGTR2,APOE,DRD2,DRD3,DRD4,NPC1,VLDLR
1009	GO: Biological Process	GO:0048660	regulation of smooth muscle cell proliferation	GeneOntologyBiologicalProcess_GO:0048660_regulation of smooth muscle cell proliferation	4.09071	ACE2,AGT,COMT,CTNNB1,IGF1,PRKCA
1010	GO: Biological Process	GO:0007422	peripheral nervous system development	GeneOntologyBiologicalProcess_GO:0007422_peripheral nervous system development	4.09043	AGT,CDK5,NGF,NTRK2,SOD1
1011	GO: Biological Process	GO:0019216	regulation of lipid metabolic process	GeneOntologyBiologicalProcess_GO:0019216_regulation of lipid metabolic process	4.07623	ADORA1,ADRB2,AGT,APOE,DRD3,IGF1,KCNMA1,SNCA,SOD1
1012	GO: Biological Process	GO:0042491	inner ear auditory receptor cell differentiation	GeneOntologyBiologicalProcess_GO:0042491_inner ear auditory receptor cell differentiation	4.07553	ATP2B2,KCNMA1,PAFAH1B1,SOD1
1013	GO: Biological Process	GO:0008088	axo-dendritic transport	GeneOntologyBiologicalProcess_GO:0008088_axo-dendritic transport	4.07553	APP,MAPT,PAFAH1B1,SOD1
1014	GO: Biological Process	GO:0050775	positive regulation of dendrite morphogenesis	GeneOntologyBiologicalProcess_GO:0050775_positive regulation of dendrite morphogenesis	4.07553	IL1RAPL1,KALRN,PAFAH1B1,RELN
1015	GO: Biological Process	GO:0006509	membrane protein ectodomain proteolysis	GeneOntologyBiologicalProcess_GO:0006509_membrane protein ectodomain proteolysis	4.07553	APOE,BACE1,PSEN1,PSEN2
1016	GO: Biological Process	GO:0010771	negative regulation of cell morphogenesis involved in differentiation	GeneOntologyBiologicalProcess_GO:0010771_negative regulation of cell morphogenesis involved in differentiation	4.07212	CDK5,CDK5R1,CTNNB1,NKX2-1,NLGN1,PSEN1
1017	GO: Biological Process	GO:0050714	positive regulation of protein secretion	GeneOntologyBiologicalProcess_GO:0050714_positive regulation of protein secretion	4.06638	ABAT,ADORA2A,AGT,AGTR2,CASR,DRD2,IGF1,PPP3CB
1018	GO: Biological Process	GO:0010557	positive regulation of macromolecule biosynthetic process	GeneOntologyBiologicalProcess_GO:0010557_positive regulation of macromolecule biosynthetic process	4.0646	ADRB2,AGT,AGTR2,APP,AR,BDNF,CTNNB1,DRD2,DRD3,FMR1,GRIN1,IGF1,KRAS,MECP2,NGF,NKX2-1,NOS1,NTRK1,PBX3,PPP3CB,PSEN1,RELN,TSC2
1019	GO: Biological Process	GO:2000310	regulation of NMDA receptor activity	GeneOntologyBiologicalProcess_GO:2000310_regulation of NMDA receptor activity	4.05889	DLG4,NLGN1,RELN
1020	GO: Biological Process	GO:0014051	gamma-aminobutyric acid secretion	GeneOntologyBiologicalProcess_GO:0014051_gamma-aminobutyric acid secretion	4.05889	ABAT,GRIK1,PAK1
1021	GO: Biological Process	GO:0048172	regulation of short-term neuronal synaptic plasticity	GeneOntologyBiologicalProcess_GO:0048172_regulation of short-term neuronal synaptic plasticity	4.05889	BDNF,GRIK1,GRIK2
1023	GO: Biological Process	GO:0032230	positive regulation of synaptic transmission, GABAergic	GeneOntologyBiologicalProcess_GO:0032230_positive regulation of synaptic transmission, GABAergic	4.05889	ADORA2A,GRIK1,NLGN1
1024	GO: Biological Process	GO:0045137	development of primary sexual characteristics	GeneOntologyBiologicalProcess_GO:0045137_development of primary sexual characteristics	4.05456	AGT,AR,BCL2,CHAT,DACH1,NKX2-1,NTRK1,SOD1
1025	GO: Biological Process	GO:0046545	development of primary female sexual characteristics	GeneOntologyBiologicalProcess_GO:0046545_development of primary female sexual characteristics	4.05369	AGT,BCL2,CHAT,DACH1,NKX2-1,SOD1
1026	GO: Biological Process	GO:0061337	cardiac conduction	GeneOntologyBiologicalProcess_GO:0061337_cardiac conduction	4.05369	ACE2,AGT,ATP2B2,ITPR3,KCND2,NOS1
1028	GO: Biological Process	GO:0045914	negative regulation of catecholamine metabolic process	GeneOntologyBiologicalProcess_GO:0045914_negative regulation of catecholamine metabolic process	4.04309	COMT,SNCA
1029	GO: Biological Process	GO:0008355	olfactory learning	GeneOntologyBiologicalProcess_GO:0008355_olfactory learning	4.04309	DRD4,GRIN1
1031	GO: Biological Process	GO:1903598	positive regulation of gap junction assembly	GeneOntologyBiologicalProcess_GO:1903598_positive regulation of gap junction assembly	4.04309	ACE2,AGT
1032	GO: Biological Process	GO:0003051	angiotensin-mediated drinking behavior	GeneOntologyBiologicalProcess_GO:0003051_angiotensin-mediated drinking behavior	4.04309	ACE2,AGT
1035	GO: Biological Process	GO:0021586	pons maturation	GeneOntologyBiologicalProcess_GO:0021586_pons maturation	4.04309	CDK5R1,GRIN1
1036	GO: Biological Process	GO:2000468	regulation of peroxidase activity	GeneOntologyBiologicalProcess_GO:2000468_regulation of peroxidase activity	4.04309	LRRK2,SNCA
1037	GO: Biological Process	GO:0002005	angiotensin catabolic process in blood	GeneOntologyBiologicalProcess_GO:0002005_angiotensin catabolic process in blood	4.04309	ACE,ACE2
1038	GO: Biological Process	GO:0007173	epidermal growth factor receptor signaling pathway	GeneOntologyBiologicalProcess_GO:0007173_epidermal growth factor receptor signaling pathway	4.03542	ADORA1,AGT,APP,KRAS,PSEN1,PSEN2
1039	GO: Biological Process	GO:1903650	negative regulation of cytoplasmic transport	GeneOntologyBiologicalProcess_GO:1903650_negative regulation of cytoplasmic transport	4.0173	BCL2,BRAF,CDK5,FMR1,LRRK2,NOS1
1040	GO: Biological Process	GO:0048659	smooth muscle cell proliferation	GeneOntologyBiologicalProcess_GO:0048659_smooth muscle cell proliferation	4.0173	ACE2,AGT,COMT,CTNNB1,IGF1,PRKCA
1041	GO: Biological Process	GO:0032092	positive regulation of protein binding	GeneOntologyBiologicalProcess_GO:0032092_positive regulation of protein binding	4.01415	ACE,CDK5,LRRK2,NGF,PACS1
1042	GO: Biological Process	GO:1903426	regulation of reactive oxygen species biosynthetic process	GeneOntologyBiologicalProcess_GO:1903426_regulation of reactive oxygen species biosynthetic process	4.01415	AGT,AGTR2,IGF1,SLC18A2,SNCA
1043	GO: Biological Process	GO:0048854	brain morphogenesis	GeneOntologyBiologicalProcess_GO:0048854_brain morphogenesis	3.99541	PAFAH1B1,PSEN1,PSEN2,SLC6A4
1044	GO: Biological Process	GO:0010765	positive regulation of sodium ion transport	GeneOntologyBiologicalProcess_GO:0010765_positive regulation of sodium ion transport	3.99541	ADRB2,DRD4,GNAS,NOS1
1045	GO: Biological Process	GO:0009617	response to bacterium	GeneOntologyBiologicalProcess_GO:0009617_response to bacterium	3.99504	ACE,APP,CASP3,COMT,IGF1,NKX2-1,NOS1,PRKCA,SNCA,SRR,TH,VLDLR
1046	GO: Biological Process	GO:0051171	regulation of nitrogen compound metabolic process	GeneOntologyBiologicalProcess_GO:0051171_regulation of nitrogen compound metabolic process	3.99154	ABAT,ADORA2A,ADRB2,AGT,AGTR2,APOE,APP,AR,BDNF,CDK5,CDK5R1,COMT,CTNNB1,DACH1,DRD1,DRD2,DRD3,DRD4,DRD5,DYRK1A,FMR1,GNAS,GRIN1,GRM7,IGF1,KRAS,MECP2,NGF,NKX2-1,NOS1,NTRK1,PBX3,PPP3CB,PRKCA,PSEN1,PSEN2,RELN,SLC6A3,SNCA,TSC2,VLDLR,WWC1
1047	GO: Biological Process	GO:0061003	positive regulation of dendritic spine morphogenesis	GeneOntologyBiologicalProcess_GO:0061003_positive regulation of dendritic spine morphogenesis	3.97631	KALRN,PAFAH1B1,RELN
1048	GO: Biological Process	GO:0007507	heart development	GeneOntologyBiologicalProcess_GO:0007507_heart development	3.97431	ACE,AGT,AGTR2,CASP3,CTNNB1,KCNAB1,MECP2,PPP3CB,PSEN1,TH,TSC2,VLDLR
1049	GO: Biological Process	GO:0043087	regulation of GTPase activity	GeneOntologyBiologicalProcess_GO:0043087_regulation of GTPase activity	3.96995	DLG4,GNAS,GRIN1,GRIN2A,GRIN2B,GRIN2D,KALRN,LRRK2,NTRK1,NTRK2,PAFAH1B1,SOD1,TSC2
1050	GO: Biological Process	GO:0016485	protein processing	GeneOntologyBiologicalProcess_GO:0016485_protein processing	3.96705	ACE,ACE2,AGT,CASP3,LRRK2,NGF,PSEN1,PSEN2,SNCA
1051	GO: Biological Process	GO:0042058	regulation of epidermal growth factor receptor signaling pathway	GeneOntologyBiologicalProcess_GO:0042058_regulation of epidermal growth factor receptor signaling pathway	3.96496	ADORA1,AGT,APP,PSEN1,PSEN2
1052	GO: Biological Process	GO:0030518	intracellular steroid hormone receptor signaling pathway	GeneOntologyBiologicalProcess_GO:0030518_intracellular steroid hormone receptor signaling pathway	3.96386	AR,BDNF,CTNNB1,IGF1,NTRK2,PAK1
1053	GO: Biological Process	GO:1903523	negative regulation of blood circulation	GeneOntologyBiologicalProcess_GO:1903523_negative regulation of blood circulation	3.95683	ADORA1,AGTR2,NOS1,PRKCA
1054	GO: Biological Process	GO:0008277	regulation of G-protein coupled receptor protein signaling pathway	GeneOntologyBiologicalProcess_GO:0008277_regulation of G-protein coupled receptor protein signaling pathway	3.94634	ADRB2,DRD2,DRD3,LRRK2,NOS1,SNCA
1056	GO: Biological Process	GO:0051238	sequestering of metal ion	GeneOntologyBiologicalProcess_GO:0051238_sequestering of metal ion	3.92897	DRD1,DRD2,ITPR3,NGF,NOS1,SNCA
1057	GO: Biological Process	GO:0042698	ovulation cycle	GeneOntologyBiologicalProcess_GO:0042698_ovulation cycle	3.92897	ADRB2,AGT,BCL2,CHAT,CHRNA7,SOD1
1058	GO: Biological Process	GO:0051057	positive regulation of small GTPase mediated signal transduction	GeneOntologyBiologicalProcess_GO:0051057_positive regulation of small GTPase mediated signal transduction	3.91916	IGF1,KRAS,NTRK1,RELN
1059	GO: Biological Process	GO:0048534	hematopoietic or lymphoid organ development	GeneOntologyBiologicalProcess_GO:0048534_hematopoietic or lymphoid organ development	3.91582	ACE,BCL2,BMX,BRAF,CASP3,CTNNB1,GNAS,NTRK1,PAFAH1B1,PPP3CB,PRKCA,PSEN1,PSEN2,SOD1,TYR
1060	GO: Biological Process	GO:0090330	regulation of platelet aggregation	GeneOntologyBiologicalProcess_GO:0090330_regulation of platelet aggregation	3.89888	ABAT,ADRB2,PRKCA
1061	GO: Biological Process	GO:0010042	response to manganese ion	GeneOntologyBiologicalProcess_GO:0010042_response to manganese ion	3.89888	GRIN1,LRRK2,TH
1062	GO: Biological Process	GO:0033604	negative regulation of catecholamine secretion	GeneOntologyBiologicalProcess_GO:0033604_negative regulation of catecholamine secretion	3.89888	ABAT,AGTR2,DRD2
1063	GO: Biological Process	GO:1901184	regulation of ERBB signaling pathway	GeneOntologyBiologicalProcess_GO:1901184_regulation of ERBB signaling pathway	3.89352	ADORA1,AGT,APP,PSEN1,PSEN2
1064	GO: Biological Process	GO:0031099	regeneration	GeneOntologyBiologicalProcess_GO:0031099_regeneration	3.883	ACE,ADRB2,APOE,BCL2,BDNF,BRAF,IGF1
1065	GO: Biological Process	GO:0034110	regulation of homotypic cell-cell adhesion	GeneOntologyBiologicalProcess_GO:0034110_regulation of homotypic cell-cell adhesion	3.87149	ABAT,ADORA2A,ADRB2,CASP3,CTNNB1,IGF1,PAK1,PRKCA,SOD1
1066	GO: Biological Process	GO:0045165	cell fate commitment	GeneOntologyBiologicalProcess_GO:0045165_cell fate commitment	3.85069	AR,BCL2,CASP3,CTNNB1,NKX2-1,NTF4,PSEN1,PSEN2
1067	GO: Biological Process	GO:0060563	neuroepithelial cell differentiation	GeneOntologyBiologicalProcess_GO:0060563_neuroepithelial cell differentiation	3.84738	ATP2B2,BCL2,KCNMA1,PAFAH1B1,SOD1
1068	GO: Biological Process	GO:0017038	protein import	GeneOntologyBiologicalProcess_GO:0017038_protein import	3.84348	AGT,AGTR2,APOE,CTNNB1,DRD1,IGF1,PEX13,PPP3CB,TSC2
1069	GO: Biological Process	GO:0031331	positive regulation of cellular catabolic process	GeneOntologyBiologicalProcess_GO:0031331_positive regulation of cellular catabolic process	3.8342	ADRB2,APOE,FMR1,IGF1,LRRK2,PSEN1,PSEN2,SNCA,TSC2
1070	GO: Biological Process	GO:1903305	regulation of regulated secretory pathway	GeneOntologyBiologicalProcess_GO:1903305_regulation of regulated secretory pathway	3.82763	BRAF,CDK5,FMR1,LRRK2,NLGN1,SYN1
1071	GO: Biological Process	GO:0010544	negative regulation of platelet activation	GeneOntologyBiologicalProcess_GO:0010544_negative regulation of platelet activation	3.82599	ABAT,ADRB2,APOE
1072	GO: Biological Process	GO:0042754	negative regulation of circadian rhythm	GeneOntologyBiologicalProcess_GO:0042754_negative regulation of circadian rhythm	3.82599	ADORA1,DRD1,DRD2
1073	GO: Biological Process	GO:0010638	positive regulation of organelle organization	GeneOntologyBiologicalProcess_GO:0010638_positive regulation of organelle organization	3.81979	ADRB2,BCL2,BRAF,CDK5,CTNNB1,DRD3,FMR1,IGF1,MAPT,NOS1,PAK1,SYNJ1
1074	GO: Biological Process	GO:0032787	monocarboxylic acid metabolic process	GeneOntologyBiologicalProcess_GO:0032787_monocarboxylic acid metabolic process	3.81325	ABAT,ADH1C,AGT,FAAH,GAD1,IGF1,NPC1,PEX13,SLC1A3,SNCA,SRR,TH
1075	GO: Biological Process	GO:0001655	urogenital system development	GeneOntologyBiologicalProcess_GO:0001655_urogenital system development	3.80658	ACE,AGT,AGTR2,AR,BCL2,BDNF,CTNNB1,IGF1,LRRK2
1076	GO: Biological Process	GO:0032869	cellular response to insulin stimulus	GeneOntologyBiologicalProcess_GO:0032869_cellular response to insulin stimulus	3.80439	AGT,DRD1,IGF1,PAK1,PRKCA,TSC2,VLDLR
1077	GO: Biological Process	GO:0046660	female sex differentiation	GeneOntologyBiologicalProcess_GO:0046660_female sex differentiation	3.79491	AGT,BCL2,CHAT,DACH1,NKX2-1,SOD1
1078	GO: Biological Process	GO:0007584	response to nutrient	GeneOntologyBiologicalProcess_GO:0007584_response to nutrient	3.79155	CHAT,IGF1,MAPT,NOS1,SLC6A4,TYR,VLDLR
1079	GO: Biological Process	GO:0008643	carbohydrate transport	GeneOntologyBiologicalProcess_GO:0008643_carbohydrate transport	3.79155	ACE,AGT,BRAF,DRD1,IGF1,PRKCA,TSC2
1080	GO: Biological Process	GO:0010876	lipid localization	GeneOntologyBiologicalProcess_GO:0010876_lipid localization	3.77018	ACE,AGT,AGTR2,APOE,DRD2,DRD3,DRD4,NPC1,VLDLR
1081	GO: Biological Process	GO:0019218	regulation of steroid metabolic process	GeneOntologyBiologicalProcess_GO:0019218_regulation of steroid metabolic process	3.75841	AGT,APOE,IGF1,KCNMA1,SOD1
1082	GO: Biological Process	GO:0048709	oligodendrocyte differentiation	GeneOntologyBiologicalProcess_GO:0048709_oligodendrocyte differentiation	3.75841	CDK5,CTNNB1,DRD3,NKX2-1,NTRK2
1083	GO: Biological Process	GO:0007200	phospholipase C-activating G-protein coupled receptor signaling pathway	GeneOntologyBiologicalProcess_GO:0007200_phospholipase C-activating G-protein coupled receptor signaling pathway	3.75841	AGT,CASR,DRD1,DRD2,DRD5
1084	GO: Biological Process	GO:0015812	gamma-aminobutyric acid transport	GeneOntologyBiologicalProcess_GO:0015812_gamma-aminobutyric acid transport	3.75716	ABAT,GRIK1,PAK1
1085	GO: Biological Process	GO:0003084	positive regulation of systemic arterial blood pressure	GeneOntologyBiologicalProcess_GO:0003084_positive regulation of systemic arterial blood pressure	3.75716	ACE,AGT,CHRNA7
1086	GO: Biological Process	GO:0007625	grooming behavior	GeneOntologyBiologicalProcess_GO:0007625_grooming behavior	3.75716	DLG4,DRD1,DRD2
1087	GO: Biological Process	GO:0009889	regulation of biosynthetic process	GeneOntologyBiologicalProcess_GO:0009889_regulation of biosynthetic process	3.74719	ADORA2A,ADRB2,AGT,AGTR2,APOE,APP,AR,BCL2,BDNF,CDK5,CDK5R1,CTNNB1,DACH1,DRD1,DRD2,DRD3,DRD4,DRD5,FMR1,GNAS,GRIN1,GRM7,IGF1,KRAS,MECP2,NGF,NKX2-1,NOS1,NTRK1,PBX3,PPP3CB,PRKCA,PSEN1,PSEN2,RELN,SLC18A2,SNCA,SOD1,TSC2,VLDLR,WWC1
1088	GO: Biological Process	GO:0060244	negative regulation of cell proliferation involved in contact inhibition	GeneOntologyBiologicalProcess_GO:0060244_negative regulation of cell proliferation involved in contact inhibition	3.74363	DACH1,PAK1
1090	GO: Biological Process	GO:0044266	multicellular organismal macromolecule catabolic process	GeneOntologyBiologicalProcess_GO:0044266_multicellular organismal macromolecule catabolic process	3.74363	ACE,ACE2
1091	GO: Biological Process	GO:0002018	renin-angiotensin regulation of aldosterone production	GeneOntologyBiologicalProcess_GO:0002018_renin-angiotensin regulation of aldosterone production	3.74363	AGT,AGTR2
1092	GO: Biological Process	GO:0021769	orbitofrontal cortex development	GeneOntologyBiologicalProcess_GO:0021769_orbitofrontal cortex development	3.74363	DRD1,DRD2
1093	GO: Biological Process	GO:1903423	positive regulation of synaptic vesicle recycling	GeneOntologyBiologicalProcess_GO:1903423_positive regulation of synaptic vesicle recycling	3.74363	NLGN1,SYNJ1
1094	GO: Biological Process	GO:0038026	reelin-mediated signaling pathway	GeneOntologyBiologicalProcess_GO:0038026_reelin-mediated signaling pathway	3.74363	RELN,VLDLR
1095	GO: Biological Process	GO:0044254	multicellular organismal protein catabolic process	GeneOntologyBiologicalProcess_GO:0044254_multicellular organismal protein catabolic process	3.74363	ACE,ACE2
1098	GO: Biological Process	GO:0002019	regulation of renal output by angiotensin	GeneOntologyBiologicalProcess_GO:0002019_regulation of renal output by angiotensin	3.74363	ACE,AGT
1099	GO: Biological Process	GO:0090325	regulation of locomotion involved in locomotory behavior	GeneOntologyBiologicalProcess_GO:0090325_regulation of locomotion involved in locomotory behavior	3.74363	DRD2,DRD3
1101	GO: Biological Process	GO:0051944	positive regulation of catecholamine uptake involved in synaptic transmission	GeneOntologyBiologicalProcess_GO:0051944_positive regulation of catecholamine uptake involved in synaptic transmission	3.74363	DRD2,DRD4
1102	GO: Biological Process	GO:0044256	protein digestion	GeneOntologyBiologicalProcess_GO:0044256_protein digestion	3.74363	ACE,ACE2
1104	GO: Biological Process	GO:0007271	synaptic transmission, cholinergic	GeneOntologyBiologicalProcess_GO:0007271_synaptic transmission, cholinergic	3.74327	ADORA2A,APOE,CHRNA4,CHRNA7
1105	GO: Biological Process	GO:0038127	ERBB signaling pathway	GeneOntologyBiologicalProcess_GO:0038127_ERBB signaling pathway	3.71529	ADORA1,AGT,APP,KRAS,PSEN1,PSEN2
1106	GO: Biological Process	GO:0072583	clathrin-dependent endocytosis	GeneOntologyBiologicalProcess_GO:0072583_clathrin-dependent endocytosis	3.71035	CDK5,NLGN1,SNCA,SYNJ1
1107	GO: Biological Process	GO:0051604	protein maturation	GeneOntologyBiologicalProcess_GO:0051604_protein maturation	3.70768	ACE,ACE2,AGT,CASP3,LRRK2,NGF,PSEN1,PSEN2,SNCA
1108	GO: Biological Process	GO:0010977	negative regulation of neuron projection development	GeneOntologyBiologicalProcess_GO:0010977_negative regulation of neuron projection development	3.69973	APOE,CDK5,CDK5R1,NLGN1,PAFAH1B1,PSEN1
1109	GO: Biological Process	GO:0034767	positive regulation of ion transmembrane transport	GeneOntologyBiologicalProcess_GO:0034767_positive regulation of ion transmembrane transport	3.69973	CASR,DRD1,DRD4,NOS1,RELN,SNCA
1110	GO: Biological Process	GO:0042762	regulation of sulfur metabolic process	GeneOntologyBiologicalProcess_GO:0042762_regulation of sulfur metabolic process	3.69196	COMT,CTNNB1,SNCA
1111	GO: Biological Process	GO:0071880	adenylate cyclase-activating adrenergic receptor signaling pathway	GeneOntologyBiologicalProcess_GO:0071880_adenylate cyclase-activating adrenergic receptor signaling pathway	3.69196	ADRB2,DRD2,GNAS
1112	GO: Biological Process	GO:1903429	regulation of cell maturation	GeneOntologyBiologicalProcess_GO:1903429_regulation of cell maturation	3.69196	BCL2,LRRK2,NGF
1113	GO: Biological Process	GO:0010288	response to lead ion	GeneOntologyBiologicalProcess_GO:0010288_response to lead ion	3.69196	APP,MECP2,NOS1
1114	GO: Biological Process	GO:0042987	amyloid precursor protein catabolic process	GeneOntologyBiologicalProcess_GO:0042987_amyloid precursor protein catabolic process	3.69196	APOE,PSEN1,PSEN2
1115	GO: Biological Process	GO:0050817	coagulation	GeneOntologyBiologicalProcess_GO:0050817_coagulation	3.69009	ABAT,ADORA2A,ADRB2,APOE,GNAS,ITPR3,PRKCA,PSEN1,PSEN2
1116	GO: Biological Process	GO:0009890	negative regulation of biosynthetic process	GeneOntologyBiologicalProcess_GO:0009890_negative regulation of biosynthetic process	3.68303	APOE,AR,CDK5,CDK5R1,CTNNB1,DACH1,DRD2,DRD3,DRD4,FMR1,GRM7,MECP2,NKX2-1,PRKCA,PSEN1,PSEN2,SLC18A2,SNCA,SOD1,VLDLR,WWC1
1117	GO: Biological Process	GO:0048260	positive regulation of receptor-mediated endocytosis	GeneOntologyBiologicalProcess_GO:0048260_positive regulation of receptor-mediated endocytosis	3.67811	DRD2,FMR1,NLGN1,SYNJ1
1118	GO: Biological Process	GO:1902305	regulation of sodium ion transmembrane transport	GeneOntologyBiologicalProcess_GO:1902305_regulation of sodium ion transmembrane transport	3.67811	AGT,DRD3,DRD4,NOS1
1119	GO: Biological Process	GO:0044282	small molecule catabolic process	GeneOntologyBiologicalProcess_GO:0044282_small molecule catabolic process	3.67262	ABAT,ADH1C,APOE,FAAH,GAD1,HDC,NOS1,PEX13,SYNJ1
1120	GO: Biological Process	GO:0051172	negative regulation of nitrogen compound metabolic process	GeneOntologyBiologicalProcess_GO:0051172_negative regulation of nitrogen compound metabolic process	3.66477	APOE,AR,CDK5,CDK5R1,COMT,CTNNB1,DACH1,DRD2,DRD3,DRD4,DYRK1A,FMR1,GRM7,MECP2,NKX2-1,PRKCA,PSEN1,PSEN2,SNCA,VLDLR,WWC1
1122	GO: Biological Process	GO:0019219	regulation of nucleobase-containing compound metabolic process	GeneOntologyBiologicalProcess_GO:0019219_regulation of nucleobase-containing compound metabolic process	3.65306	ADORA2A,ADRB2,AGT,AGTR2,APOE,APP,AR,BDNF,CDK5,CDK5R1,CTNNB1,DACH1,DRD1,DRD2,DRD3,DRD4,DRD5,DYRK1A,FMR1,GNAS,GRIN1,GRM7,IGF1,KRAS,MECP2,NGF,NKX2-1,NOS1,NTRK1,PBX3,PPP3CB,PRKCA,PSEN1,PSEN2,RELN,SNCA,TSC2,VLDLR,WWC1
1123	GO: Biological Process	GO:0022405	hair cycle process	GeneOntologyBiologicalProcess_GO:0022405_hair cycle process	3.65293	BCL2,CTNNB1,GNAS,PSEN1,PSEN2
1124	GO: Biological Process	GO:0022404	molting cycle process	GeneOntologyBiologicalProcess_GO:0022404_molting cycle process	3.65293	BCL2,CTNNB1,GNAS,PSEN1,PSEN2
1125	GO: Biological Process	GO:0001942	hair follicle development	GeneOntologyBiologicalProcess_GO:0001942_hair follicle development	3.65293	BCL2,CTNNB1,GNAS,PSEN1,PSEN2
1126	GO: Biological Process	GO:0071363	cellular response to growth factor stimulus	GeneOntologyBiologicalProcess_GO:0071363_cellular response to growth factor stimulus	3.64782	AGT,AGTR2,APP,CASP3,CTNNB1,NGF,NKX2-1,NOS1,NTRK1,NTRK2,SNCA,TH
1127	GO: Biological Process	GO:2001257	regulation of cation channel activity	GeneOntologyBiologicalProcess_GO:2001257_regulation of cation channel activity	3.63255	DRD2,DRD4,FMR1,KCNAB1,NOS1
1128	GO: Biological Process	GO:0048266	behavioral response to pain	GeneOntologyBiologicalProcess_GO:0048266_behavioral response to pain	3.63003	GRIK1,GRIN2B,NTRK1
1129	GO: Biological Process	GO:0060117	auditory receptor cell development	GeneOntologyBiologicalProcess_GO:0060117_auditory receptor cell development	3.63003	ATP2B2,PAFAH1B1,SOD1
1130	GO: Biological Process	GO:0051000	positive regulation of nitric-oxide synthase activity	GeneOntologyBiologicalProcess_GO:0051000_positive regulation of nitric-oxide synthase activity	3.63003	AGTR2,APOE,KRAS
1131	GO: Biological Process	GO:0033619	membrane protein proteolysis	GeneOntologyBiologicalProcess_GO:0033619_membrane protein proteolysis	3.61557	APOE,BACE1,PSEN1,PSEN2
1132	GO: Biological Process	GO:0030097	hemopoiesis	GeneOntologyBiologicalProcess_GO:0030097_hemopoiesis	3.61295	ACE,BCL2,BMX,BRAF,CASP3,CTNNB1,GNAS,NTRK1,PAFAH1B1,PPP3CB,PRKCA,PSEN1,PSEN2,SOD1
1133	GO: Biological Process	GO:0048145	regulation of fibroblast proliferation	GeneOntologyBiologicalProcess_GO:0048145_regulation of fibroblast proliferation	3.6124	AGT,AGTR2,CTNNB1,DACH1,IGF1
1134	GO: Biological Process	GO:0060993	kidney morphogenesis	GeneOntologyBiologicalProcess_GO:0060993_kidney morphogenesis	3.6124	AGT,AGTR2,BCL2,CTNNB1,LRRK2
1135	GO: Biological Process	GO:0098773	skin epidermis development	GeneOntologyBiologicalProcess_GO:0098773_skin epidermis development	3.6124	BCL2,CTNNB1,GNAS,PSEN1,PSEN2
1136	GO: Biological Process	GO:2000379	positive regulation of reactive oxygen species metabolic process	GeneOntologyBiologicalProcess_GO:2000379_positive regulation of reactive oxygen species metabolic process	3.6124	ACE2,AGT,AGTR2,SNCA,SOD1
1137	GO: Biological Process	GO:0090150	establishment of protein localization to membrane	GeneOntologyBiologicalProcess_GO:0090150_establishment of protein localization to membrane	3.61239	ADORA1,AR,BCL2,BRAF,CDK5,CDK5R1,NPC1,PACS1,TSC2
1138	GO: Biological Process	GO:0051348	negative regulation of transferase activity	GeneOntologyBiologicalProcess_GO:0051348_negative regulation of transferase activity	3.6039	ADORA2A,APOE,CASP3,DRD1,DRD5,PRKCA,PSEN1,PSEN2,TSC2
1139	GO: Biological Process	GO:0033043	regulation of organelle organization	GeneOntologyBiologicalProcess_GO:0033043_regulation of organelle organization	3.58409	ADRB2,BCL2,BRAF,CDK5,CDK5R1,CTNNB1,DRD3,FMR1,IGF1,LRRK2,MAPT,MECP2,NOS1,PAFAH1B1,PAK1,SNCA,SYNJ1
1140	GO: Biological Process	GO:0051260	protein homooligomerization	GeneOntologyBiologicalProcess_GO:0051260_protein homooligomerization	3.58291	APP,ITPR3,KCND2,KCNMA1,NLGN1,SLC6A4,SRR,TSC2
1141	GO: Biological Process	GO:0034764	positive regulation of transmembrane transport	GeneOntologyBiologicalProcess_GO:0034764_positive regulation of transmembrane transport	3.57931	CASR,DRD1,DRD4,NOS1,RELN,SNCA
1142	GO: Biological Process	GO:0045862	positive regulation of proteolysis	GeneOntologyBiologicalProcess_GO:0045862_positive regulation of proteolysis	3.57859	APOE,APP,CASP3,FMR1,LRRK2,NGF,PSEN1,PSEN2,SNCA
1143	GO: Biological Process	GO:0035809	regulation of urine volume	GeneOntologyBiologicalProcess_GO:0035809_regulation of urine volume	3.57108	ADORA2A,ADRB2,DRD2
1144	GO: Biological Process	GO:0010996	response to auditory stimulus	GeneOntologyBiologicalProcess_GO:0010996_response to auditory stimulus	3.57108	DRD2,NTRK2,SLC1A3
1145	GO: Biological Process	GO:0061061	muscle structure development	GeneOntologyBiologicalProcess_GO:0061061_muscle structure development	3.56239	ADRB2,AGT,AGTR2,BCL2,BDNF,CDK5,CHAT,CTNNB1,IGF1,KCNAB1,KRAS,NOS1
1146	GO: Biological Process	GO:2001234	negative regulation of apoptotic signaling pathway	GeneOntologyBiologicalProcess_GO:2001234_negative regulation of apoptotic signaling pathway	3.56038	AR,BCL2,CTNNB1,IGF1,LRRK2,PSEN1,PSEN2
1147	GO: Biological Process	GO:0048144	fibroblast proliferation	GeneOntologyBiologicalProcess_GO:0048144_fibroblast proliferation	3.55324	AGT,AGTR2,CTNNB1,DACH1,IGF1
1148	GO: Biological Process	GO:0030162	regulation of proteolysis	GeneOntologyBiologicalProcess_GO:0030162_regulation of proteolysis	3.54611	ADORA2A,AGT,APOE,APP,CASP3,CDK5,FMR1,IGF1,LRRK2,NGF,PSEN1,PSEN2,SNCA
1149	GO: Biological Process	GO:1904951	positive regulation of establishment of protein localization	GeneOntologyBiologicalProcess_GO:1904951_positive regulation of establishment of protein localization	3.53599	ABAT,ADORA2A,AGT,AGTR2,BCL2,CASR,CDK5,CDK5R1,DRD2,IGF1,PPP3CB
1150	GO: Biological Process	GO:0001657	ureteric bud development	GeneOntologyBiologicalProcess_GO:0001657_ureteric bud development	3.53394	AGT,AGTR2,BCL2,BDNF,CTNNB1
1151	GO: Biological Process	GO:0030855	epithelial cell differentiation	GeneOntologyBiologicalProcess_GO:0030855_epithelial cell differentiation	3.53247	AGT,AR,ATP2B2,BCL2,CASP3,CTNNB1,IGF1,KCNMA1,NKX2-1,NTRK1,PAFAH1B1,SOD1
1152	GO: Biological Process	GO:0048286	lung alveolus development	GeneOntologyBiologicalProcess_GO:0048286_lung alveolus development	3.52627	ACE,IGF1,NKX2-1,PSEN2
1153	GO: Biological Process	GO:0051387	negative regulation of neurotrophin TRK receptor signaling pathway	GeneOntologyBiologicalProcess_GO:0051387_negative regulation of neurotrophin TRK receptor signaling pathway	3.52336	AGT,AGTR2
1154	GO: Biological Process	GO:0034465	response to carbon monoxide	GeneOntologyBiologicalProcess_GO:0034465_response to carbon monoxide	3.52336	KCNMA1,SOD1
1156	GO: Biological Process	GO:0014042	positive regulation of neuron maturation	GeneOntologyBiologicalProcess_GO:0014042_positive regulation of neuron maturation	3.52336	BCL2,NGF
1157	GO: Biological Process	GO:0016080	synaptic vesicle targeting	GeneOntologyBiologicalProcess_GO:0016080_synaptic vesicle targeting	3.52336	NLGN1,PSEN1
1159	GO: Biological Process	GO:0048143	astrocyte activation	GeneOntologyBiologicalProcess_GO:0048143_astrocyte activation	3.52336	ADORA2A,AGT
1160	GO: Biological Process	GO:2000301	negative regulation of synaptic vesicle exocytosis	GeneOntologyBiologicalProcess_GO:2000301_negative regulation of synaptic vesicle exocytosis	3.52336	BRAF,FMR1
1161	GO: Biological Process	GO:0090206	negative regulation of cholesterol metabolic process	GeneOntologyBiologicalProcess_GO:0090206_negative regulation of cholesterol metabolic process	3.52336	APOE,SOD1
1163	GO: Biological Process	GO:0045541	negative regulation of cholesterol biosynthetic process	GeneOntologyBiologicalProcess_GO:0045541_negative regulation of cholesterol biosynthetic process	3.52336	APOE,SOD1
1164	GO: Biological Process	GO:0035564	regulation of kidney size	GeneOntologyBiologicalProcess_GO:0035564_regulation of kidney size	3.52336	AGTR2,LRRK2
1165	GO: Biological Process	GO:0044268	multicellular organismal protein metabolic process	GeneOntologyBiologicalProcess_GO:0044268_multicellular organismal protein metabolic process	3.52336	ACE,ACE2
1166	GO: Biological Process	GO:0030004	cellular monovalent inorganic cation homeostasis	GeneOntologyBiologicalProcess_GO:0030004_cellular monovalent inorganic cation homeostasis	3.51485	AGT,AGTR2,BCL2,KCNMA1,LRRK2
1167	GO: Biological Process	GO:0072164	mesonephric tubule development	GeneOntologyBiologicalProcess_GO:0072164_mesonephric tubule development	3.51485	AGT,AGTR2,BCL2,BDNF,CTNNB1
1168	GO: Biological Process	GO:0072163	mesonephric epithelium development	GeneOntologyBiologicalProcess_GO:0072163_mesonephric epithelium development	3.51485	AGT,AGTR2,BCL2,BDNF,CTNNB1
1169	GO: Biological Process	GO:0010522	regulation of calcium ion transport into cytosol	GeneOntologyBiologicalProcess_GO:0010522_regulation of calcium ion transport into cytosol	3.51485	BCL2,DRD1,NGF,NOS1,SNCA
1170	GO: Biological Process	GO:0002029	desensitization of G-protein coupled receptor protein signaling pathway	GeneOntologyBiologicalProcess_GO:0002029_desensitization of G-protein coupled receptor protein signaling pathway	3.51483	ADRB2,DRD2,DRD3
1171	GO: Biological Process	GO:0043586	tongue development	GeneOntologyBiologicalProcess_GO:0043586_tongue development	3.51483	BDNF,CTNNB1,NTF4
1172	GO: Biological Process	GO:0048521	negative regulation of behavior	GeneOntologyBiologicalProcess_GO:0048521_negative regulation of behavior	3.51483	ADORA1,DRD1,DRD2
1173	GO: Biological Process	GO:0022401	negative adaptation of signaling pathway	GeneOntologyBiologicalProcess_GO:0022401_negative adaptation of signaling pathway	3.51483	ADRB2,DRD2,DRD3
1174	GO: Biological Process	GO:0042060	wound healing	GeneOntologyBiologicalProcess_GO:0042060_wound healing	3.50344	ABAT,ADORA2A,ADRB2,APOE,CASP3,DRD5,GNAS,IGF1,ITPR3,PAK1,PRKCA
1175	GO: Biological Process	GO:0070527	platelet aggregation	GeneOntologyBiologicalProcess_GO:0070527_platelet aggregation	3.49761	ABAT,ADRB2,GNAS,PRKCA
1176	GO: Biological Process	GO:0043409	negative regulation of MAPK cascade	GeneOntologyBiologicalProcess_GO:0043409_negative regulation of MAPK cascade	3.49343	ACE2,APOE,IGF1,PAFAH1B1,PRKCA,TSC2
1177	GO: Biological Process	GO:0070848	response to growth factor	GeneOntologyBiologicalProcess_GO:0070848_response to growth factor	3.47937	AGT,AGTR2,APP,CASP3,CTNNB1,NGF,NKX2-1,NOS1,NTRK1,NTRK2,SNCA,TH
1178	GO: Biological Process	GO:0006935	chemotaxis	GeneOntologyBiologicalProcess_GO:0006935_chemotaxis	3.47126	APP,BDNF,CASR,CDK5,CDK5R1,KRAS,NKX2-1,NTRK1,PRKCA,RELN,TSC2
1179	GO: Biological Process	GO:0009266	response to temperature stimulus	GeneOntologyBiologicalProcess_GO:0009266_response to temperature stimulus	3.46976	ADORA1,ADRB2,AGT,IGF1,NOS1,NTRK1,SOD1
1180	GO: Biological Process	GO:0030168	platelet activation	GeneOntologyBiologicalProcess_GO:0030168_platelet activation	3.4656	ABAT,ADRB2,APOE,GNAS,ITPR3,PRKCA
1181	GO: Biological Process	GO:0051591	response to cAMP	GeneOntologyBiologicalProcess_GO:0051591_response to cAMP	3.45876	APP,BRAF,ITPR3,SLC6A3,TYR
1182	GO: Biological Process	GO:0042330	taxis	GeneOntologyBiologicalProcess_GO:0042330_taxis	3.45849	APP,BDNF,CASR,CDK5,CDK5R1,KRAS,NKX2-1,NTRK1,PRKCA,RELN,TSC2
1183	GO: Biological Process	GO:0001944	vasculature development	GeneOntologyBiologicalProcess_GO:0001944_vasculature development	3.4445	ACE,ADRB2,AGT,APOE,CHRNA7,CTNNB1,IGF1,NTRK1,NTRK2,PPP3CB,PRKCA,PSEN1
1184	GO: Biological Process	GO:0032768	regulation of monooxygenase activity	GeneOntologyBiologicalProcess_GO:0032768_regulation of monooxygenase activity	3.44187	AGTR2,APOE,KRAS,SNCA
1185	GO: Biological Process	GO:0001823	mesonephros development	GeneOntologyBiologicalProcess_GO:0001823_mesonephros development	3.44045	AGT,AGTR2,BCL2,BDNF,CTNNB1
1186	GO: Biological Process	GO:0022602	ovulation cycle process	GeneOntologyBiologicalProcess_GO:0022602_ovulation cycle process	3.44045	AGT,BCL2,CHAT,CHRNA7,SOD1
1187	GO: Biological Process	GO:0043583	ear development	GeneOntologyBiologicalProcess_GO:0043583_ear development	3.43671	ATP2B2,BCL2,BDNF,IGF1,KCNMA1,PAFAH1B1,SOD1
1188	GO: Biological Process	GO:0051235	maintenance of location	GeneOntologyBiologicalProcess_GO:0051235_maintenance of location	3.43173	APOE,DRD1,DRD2,ITPR3,NGF,NOS1,SLC18A2,SNCA
1189	GO: Biological Process	GO:0010507	negative regulation of autophagy	GeneOntologyBiologicalProcess_GO:0010507_negative regulation of autophagy	3.41474	BCL2,LRRK2,NPC1,SNCA
1190	GO: Biological Process	GO:0051881	regulation of mitochondrial membrane potential	GeneOntologyBiologicalProcess_GO:0051881_regulation of mitochondrial membrane potential	3.41474	ADORA2A,BCL2,LRRK2,SOD1
1191	GO: Biological Process	GO:0031348	negative regulation of defense response	GeneOntologyBiologicalProcess_GO:0031348_negative regulation of defense response	3.41107	ADORA1,ADORA2A,ADRB2,APOE,CHRNA7,DRD2
1192	GO: Biological Process	GO:0023058	adaptation of signaling pathway	GeneOntologyBiologicalProcess_GO:0023058_adaptation of signaling pathway	3.40956	ADRB2,DRD2,DRD3
1193	GO: Biological Process	GO:0048643	positive regulation of skeletal muscle tissue development	GeneOntologyBiologicalProcess_GO:0048643_positive regulation of skeletal muscle tissue development	3.40956	ADRB2,BCL2,CTNNB1
1194	GO: Biological Process	GO:1901020	negative regulation of calcium ion transmembrane transporter activity	GeneOntologyBiologicalProcess_GO:1901020_negative regulation of calcium ion transmembrane transporter activity	3.40956	DRD2,DRD4,FMR1
1195	GO: Biological Process	GO:0001658	branching involved in ureteric bud morphogenesis	GeneOntologyBiologicalProcess_GO:0001658_branching involved in ureteric bud morphogenesis	3.3619	AGT,AGTR2,BCL2,CTNNB1
1196	GO: Biological Process	GO:0002064	epithelial cell development	GeneOntologyBiologicalProcess_GO:0002064_epithelial cell development	3.36148	AGT,AR,ATP2B2,CTNNB1,NTRK1,PAFAH1B1,SOD1
1197	GO: Biological Process	GO:0042753	positive regulation of circadian rhythm	GeneOntologyBiologicalProcess_GO:0042753_positive regulation of circadian rhythm	3.36015	ADORA2A,NKX2-1,NLGN1
1198	GO: Biological Process	GO:1901385	regulation of voltage-gated calcium channel activity	GeneOntologyBiologicalProcess_GO:1901385_regulation of voltage-gated calcium channel activity	3.36015	DRD2,DRD4,FMR1
1199	GO: Biological Process	GO:0014742	positive regulation of muscle hypertrophy	GeneOntologyBiologicalProcess_GO:0014742_positive regulation of muscle hypertrophy	3.36015	AGT,IGF1,PRKCA
1200	GO: Biological Process	GO:0010613	positive regulation of cardiac muscle hypertrophy	GeneOntologyBiologicalProcess_GO:0010613_positive regulation of cardiac muscle hypertrophy	3.36015	AGT,IGF1,PRKCA
1201	GO: Biological Process	GO:0034447	very-low-density lipoprotein particle clearance	GeneOntologyBiologicalProcess_GO:0034447_very-low-density lipoprotein particle clearance	3.34884	APOE,VLDLR
1202	GO: Biological Process	GO:2000324	positive regulation of glucocorticoid receptor signaling pathway	GeneOntologyBiologicalProcess_GO:2000324_positive regulation of glucocorticoid receptor signaling pathway	3.34884	BDNF,NTRK2
1203	GO: Biological Process	GO:1990314	cellular response to insulin-like growth factor stimulus	GeneOntologyBiologicalProcess_GO:1990314_cellular response to insulin-like growth factor stimulus	3.34884	CTNNB1,IGF1
1204	GO: Biological Process	GO:0021853	cerebral cortex GABAergic interneuron migration	GeneOntologyBiologicalProcess_GO:0021853_cerebral cortex GABAergic interneuron migration	3.34884	DRD1,DRD2
1205	GO: Biological Process	GO:1902804	negative regulation of synaptic vesicle transport	GeneOntologyBiologicalProcess_GO:1902804_negative regulation of synaptic vesicle transport	3.34884	BRAF,FMR1
1206	GO: Biological Process	GO:0007199	G-protein coupled receptor signaling pathway coupled to cGMP nucleotide second messenger	GeneOntologyBiologicalProcess_GO:0007199_G-protein coupled receptor signaling pathway coupled to cGMP nucleotide second messenger	3.34884	AGT,AGTR2
1208	GO: Biological Process	GO:1904936	interneuron migration	GeneOntologyBiologicalProcess_GO:1904936_interneuron migration	3.34884	DRD1,DRD2
1209	GO: Biological Process	GO:0002034	regulation of blood vessel diameter by renin-angiotensin	GeneOntologyBiologicalProcess_GO:0002034_regulation of blood vessel diameter by renin-angiotensin	3.34884	AGT,AGTR2
1210	GO: Biological Process	GO:0046958	nonassociative learning	GeneOntologyBiologicalProcess_GO:0046958_nonassociative learning	3.34884	DRD1,DRD5
1211	GO: Biological Process	GO:1902805	positive regulation of synaptic vesicle transport	GeneOntologyBiologicalProcess_GO:1902805_positive regulation of synaptic vesicle transport	3.34884	NLGN1,SYNJ1
1212	GO: Biological Process	GO:0003072	renal control of peripheral vascular resistance involved in regulation of systemic arterial blood pressure	GeneOntologyBiologicalProcess_GO:0003072_renal control of peripheral vascular resistance involved in regulation of systemic arterial blood pressure	3.34884	AGT,AGTR2
1213	GO: Biological Process	GO:0002793	positive regulation of peptide secretion	GeneOntologyBiologicalProcess_GO:0002793_positive regulation of peptide secretion	3.33437	ABAT,ADORA1,CASR,DRD2,PPP3CB
1214	GO: Biological Process	GO:0031345	negative regulation of cell projection organization	GeneOntologyBiologicalProcess_GO:0031345_negative regulation of cell projection organization	3.31909	APOE,CDK5,CDK5R1,NLGN1,PAFAH1B1,PSEN1
1215	GO: Biological Process	GO:0009896	positive regulation of catabolic process	GeneOntologyBiologicalProcess_GO:0009896_positive regulation of catabolic process	3.31573	ADRB2,APOE,FMR1,IGF1,LRRK2,PSEN1,PSEN2,SNCA,TSC2
1216	GO: Biological Process	GO:0003071	renal system process involved in regulation of systemic arterial blood pressure	GeneOntologyBiologicalProcess_GO:0003071_renal system process involved in regulation of systemic arterial blood pressure	3.31268	ADORA1,AGT,AGTR2
1217	GO: Biological Process	GO:0009651	response to salt stress	GeneOntologyBiologicalProcess_GO:0009651_response to salt stress	3.31268	AGT,NKX2-1,TH
1218	GO: Biological Process	GO:0051354	negative regulation of oxidoreductase activity	GeneOntologyBiologicalProcess_GO:0051354_negative regulation of oxidoreductase activity	3.31268	DRD5,LRRK2,SNCA
1219	GO: Biological Process	GO:0060425	lung morphogenesis	GeneOntologyBiologicalProcess_GO:0060425_lung morphogenesis	3.31083	CTNNB1,IGF1,KRAS,NKX2-1
1220	GO: Biological Process	GO:0008406	gonad development	GeneOntologyBiologicalProcess_GO:0008406_gonad development	3.3093	AGT,AR,BCL2,CHAT,NKX2-1,NTRK1,SOD1
1221	GO: Biological Process	GO:0051222	positive regulation of protein transport	GeneOntologyBiologicalProcess_GO:0051222_positive regulation of protein transport	3.29943	ABAT,ADORA2A,AGT,AGTR2,CASR,CDK5,CDK5R1,DRD2,IGF1,PPP3CB
1222	GO: Biological Process	GO:0043900	regulation of multi-organism process	GeneOntologyBiologicalProcess_GO:0043900_regulation of multi-organism process	3.29943	APOE,BCL2,DRD4,FMR1,IGF1,PACS1,PEX13,PRKCA,SCN1A,SLC1A3
1223	GO: Biological Process	GO:0051346	negative regulation of hydrolase activity	GeneOntologyBiologicalProcess_GO:0051346_negative regulation of hydrolase activity	3.29315	ADORA2A,AGT,APP,DLG3,IGF1,LRRK2,NGF,NOS1,SNCA
1224	GO: Biological Process	GO:0060541	respiratory system development	GeneOntologyBiologicalProcess_GO:0060541_respiratory system development	3.27859	ACE,CTNNB1,IGF1,KCNAB1,KRAS,NKX2-1,PSEN2
1225	GO: Biological Process	GO:0010629	negative regulation of gene expression	GeneOntologyBiologicalProcess_GO:0010629_negative regulation of gene expression	3.2737	ACE,AGT,AR,CDK5,CDK5R1,CTNNB1,DACH1,DRD3,DYRK1A,FMR1,IGF1,LRRK2,MECP2,NKX2-1,PRKCA,PSEN1,PSEN2,SNCA,VLDLR,WWC1
1226	GO: Biological Process	GO:0042303	molting cycle	GeneOntologyBiologicalProcess_GO:0042303_molting cycle	3.26704	BCL2,CTNNB1,GNAS,PSEN1,PSEN2
1227	GO: Biological Process	GO:0042633	hair cycle	GeneOntologyBiologicalProcess_GO:0042633_hair cycle	3.26704	BCL2,CTNNB1,GNAS,PSEN1,PSEN2
1228	GO: Biological Process	GO:0032770	positive regulation of monooxygenase activity	GeneOntologyBiologicalProcess_GO:0032770_positive regulation of monooxygenase activity	3.26699	AGTR2,APOE,KRAS
1229	GO: Biological Process	GO:0015800	acidic amino acid transport	GeneOntologyBiologicalProcess_GO:0015800_acidic amino acid transport	3.26699	ABAT,PSEN1,SLC1A3
1231	GO: Biological Process	GO:1903035	negative regulation of response to wounding	GeneOntologyBiologicalProcess_GO:1903035_negative regulation of response to wounding	3.24352	ABAT,ADORA1,ADORA2A,ADRB2,APOE,CHRNA7
1232	GO: Biological Process	GO:1900407	regulation of cellular response to oxidative stress	GeneOntologyBiologicalProcess_GO:1900407_regulation of cellular response to oxidative stress	3.23734	LRRK2,NGB,SNCA,SOD1
1233	GO: Biological Process	GO:0031326	regulation of cellular biosynthetic process	GeneOntologyBiologicalProcess_GO:0031326_regulation of cellular biosynthetic process	3.22547	ADORA2A,ADRB2,AGT,AGTR2,APOE,APP,AR,BCL2,BDNF,CDK5,CDK5R1,CTNNB1,DACH1,DRD1,DRD2,DRD3,DRD4,DRD5,FMR1,GNAS,GRIN1,GRM7,IGF1,KRAS,MECP2,NGF,NKX2-1,NOS1,NTRK1,PBX3,PPP3CB,PRKCA,PSEN1,PSEN2,RELN,SNCA,TSC2,VLDLR,WWC1
1234	GO: Biological Process	GO:0009072	aromatic amino acid family metabolic process	GeneOntologyBiologicalProcess_GO:0009072_aromatic amino acid family metabolic process	3.22298	TH,TPH2,TYR
1235	GO: Biological Process	GO:0090075	relaxation of muscle	GeneOntologyBiologicalProcess_GO:0090075_relaxation of muscle	3.22298	ADORA1,KCNMA1,SOD1
1236	GO: Biological Process	GO:0048520	positive regulation of behavior	GeneOntologyBiologicalProcess_GO:0048520_positive regulation of behavior	3.22298	ADORA2A,DRD1,NLGN1
1237	GO: Biological Process	GO:0045686	negative regulation of glial cell differentiation	GeneOntologyBiologicalProcess_GO:0045686_negative regulation of glial cell differentiation	3.22298	CTNNB1,DRD3,MECP2
1238	GO: Biological Process	GO:0048668	collateral sprouting	GeneOntologyBiologicalProcess_GO:0048668_collateral sprouting	3.22298	APP,BDNF,NGF
1239	GO: Biological Process	GO:0031330	negative regulation of cellular catabolic process	GeneOntologyBiologicalProcess_GO:0031330_negative regulation of cellular catabolic process	3.21897	BCL2,LRRK2,NPC1,PSEN1,PSEN2,SNCA
1240	GO: Biological Process	GO:0033002	muscle cell proliferation	GeneOntologyBiologicalProcess_GO:0033002_muscle cell proliferation	3.21897	ACE2,AGT,COMT,CTNNB1,IGF1,PRKCA
1241	GO: Biological Process	GO:0014068	positive regulation of phosphatidylinositol 3-kinase signaling	GeneOntologyBiologicalProcess_GO:0014068_positive regulation of phosphatidylinositol 3-kinase signaling	3.21362	AGT,IGF1,NTRK2,RELN
1242	GO: Biological Process	GO:0060675	ureteric bud morphogenesis	GeneOntologyBiologicalProcess_GO:0060675_ureteric bud morphogenesis	3.21362	AGT,AGTR2,BCL2,CTNNB1
1243	GO: Biological Process	GO:2000858	regulation of aldosterone secretion	GeneOntologyBiologicalProcess_GO:2000858_regulation of aldosterone secretion	3.20428	AGT,AGTR2
1244	GO: Biological Process	GO:0035932	aldosterone secretion	GeneOntologyBiologicalProcess_GO:0035932_aldosterone secretion	3.20428	AGT,AGTR2
1245	GO: Biological Process	GO:0051176	positive regulation of sulfur metabolic process	GeneOntologyBiologicalProcess_GO:0051176_positive regulation of sulfur metabolic process	3.20428	COMT,CTNNB1
1246	GO: Biological Process	GO:1901631	positive regulation of presynaptic membrane organization	GeneOntologyBiologicalProcess_GO:1901631_positive regulation of presynaptic membrane organization	3.20428	APOE,NLGN1
1247	GO: Biological Process	GO:0021626	central nervous system maturation	GeneOntologyBiologicalProcess_GO:0021626_central nervous system maturation	3.20428	CDK5R1,GRIN1
1248	GO: Biological Process	GO:0031547	brain-derived neurotrophic factor receptor signaling pathway	GeneOntologyBiologicalProcess_GO:0031547_brain-derived neurotrophic factor receptor signaling pathway	3.20428	BDNF,NTRK2
1249	GO: Biological Process	GO:0021578	hindbrain maturation	GeneOntologyBiologicalProcess_GO:0021578_hindbrain maturation	3.20428	CDK5R1,GRIN1
1250	GO: Biological Process	GO:0032415	regulation of sodium:proton antiporter activity	GeneOntologyBiologicalProcess_GO:0032415_regulation of sodium:proton antiporter activity	3.20428	DRD3,DRD4
1251	GO: Biological Process	GO:2000855	regulation of mineralocorticoid secretion	GeneOntologyBiologicalProcess_GO:2000855_regulation of mineralocorticoid secretion	3.20428	AGT,AGTR2
1252	GO: Biological Process	GO:0060789	hair follicle placode formation	GeneOntologyBiologicalProcess_GO:0060789_hair follicle placode formation	3.20428	CTNNB1,GNAS
1253	GO: Biological Process	GO:0033239	negative regulation of cellular amine metabolic process	GeneOntologyBiologicalProcess_GO:0033239_negative regulation of cellular amine metabolic process	3.20428	COMT,SNCA
1254	GO: Biological Process	GO:0035931	mineralocorticoid secretion	GeneOntologyBiologicalProcess_GO:0035931_mineralocorticoid secretion	3.20428	AGT,AGTR2
1255	GO: Biological Process	GO:0071316	cellular response to nicotine	GeneOntologyBiologicalProcess_GO:0071316_cellular response to nicotine	3.20428	NTRK1,TH
1256	GO: Biological Process	GO:0060510	Type II pneumocyte differentiation	GeneOntologyBiologicalProcess_GO:0060510_Type II pneumocyte differentiation	3.20428	IGF1,NKX2-1
1257	GO: Biological Process	GO:0022407	regulation of cell-cell adhesion	GeneOntologyBiologicalProcess_GO:0022407_regulation of cell-cell adhesion	3.19766	ABAT,ADORA2A,ADRB2,CASP3,CTNNB1,IGF1,PAK1,PRKCA,SOD1
1258	GO: Biological Process	GO:0043401	steroid hormone mediated signaling pathway	GeneOntologyBiologicalProcess_GO:0043401_steroid hormone mediated signaling pathway	3.19472	AR,BDNF,CTNNB1,IGF1,NTRK2,PAK1
1259	GO: Biological Process	GO:0009064	glutamine family amino acid metabolic process	GeneOntologyBiologicalProcess_GO:0009064_glutamine family amino acid metabolic process	3.19027	GAD1,MECP2,NOS1,SLC1A3
1260	GO: Biological Process	GO:0072171	mesonephric tubule morphogenesis	GeneOntologyBiologicalProcess_GO:0072171_mesonephric tubule morphogenesis	3.19027	AGT,AGTR2,BCL2,CTNNB1
1261	GO: Biological Process	GO:0014910	regulation of smooth muscle cell migration	GeneOntologyBiologicalProcess_GO:0014910_regulation of smooth muscle cell migration	3.19027	ACE,AGT,BCL2,IGF1
1262	GO: Biological Process	GO:0009791	post-embryonic development	GeneOntologyBiologicalProcess_GO:0009791_post-embryonic development	3.17066	BCL2,GNAS,MECP2,PSEN1,SLC18A2
1263	GO: Biological Process	GO:0003300	cardiac muscle hypertrophy	GeneOntologyBiologicalProcess_GO:0003300_cardiac muscle hypertrophy	3.16728	AGT,AGTR2,IGF1,PRKCA
1264	GO: Biological Process	GO:0060113	inner ear receptor cell differentiation	GeneOntologyBiologicalProcess_GO:0060113_inner ear receptor cell differentiation	3.16728	ATP2B2,KCNMA1,PAFAH1B1,SOD1
1265	GO: Biological Process	GO:0032868	response to insulin	GeneOntologyBiologicalProcess_GO:0032868_response to insulin	3.15997	AGT,DRD1,IGF1,PAK1,PRKCA,TSC2,VLDLR
1266	GO: Biological Process	GO:2001235	positive regulation of apoptotic signaling pathway	GeneOntologyBiologicalProcess_GO:2001235_positive regulation of apoptotic signaling pathway	3.14712	ADORA2A,AGT,AGTR2,BCL2,PSEN2,SOD1
1267	GO: Biological Process	GO:1903170	negative regulation of calcium ion transmembrane transport	GeneOntologyBiologicalProcess_GO:1903170_negative regulation of calcium ion transmembrane transport	3.13951	DRD2,DRD4,FMR1
1269	GO: Biological Process	GO:0044255	cellular lipid metabolic process	GeneOntologyBiologicalProcess_GO:0044255_cellular lipid metabolic process	3.13163	ADH1C,ADRB2,AGT,APOE,CHAT,DRD1,DRD2,FAAH,MECP2,NKX2-1,PAFAH1B1,PEX13,SNCA,SYNJ1,TH
1270	GO: Biological Process	GO:0043200	response to amino acid	GeneOntologyBiologicalProcess_GO:0043200_response to amino acid	3.12441	CASP3,DRD1,GRIN2A,NTRK2,SLC1A3
1271	GO: Biological Process	GO:0045787	positive regulation of cell cycle	GeneOntologyBiologicalProcess_GO:0045787_positive regulation of cell cycle	3.12355	APP,CDK5R1,DRD2,DRD3,IGF1,PAFAH1B1,PRKCA,SLC6A4
1272	GO: Biological Process	GO:1901019	regulation of calcium ion transmembrane transporter activity	GeneOntologyBiologicalProcess_GO:1901019_regulation of calcium ion transmembrane transporter activity	3.12234	DRD2,DRD4,FMR1,NOS1
1273	GO: Biological Process	GO:0006518	peptide metabolic process	GeneOntologyBiologicalProcess_GO:0006518_peptide metabolic process	3.10228	ACE,ACE2,AGT,APOE,APP,BACE1,FMR1,IGF1,NGF,PRKCA,PSEN1,PSEN2,SOD1
1274	GO: Biological Process	GO:0006809	nitric oxide biosynthetic process	GeneOntologyBiologicalProcess_GO:0006809_nitric oxide biosynthetic process	3.10037	AGT,AGTR2,IGF1,NOS1
1275	GO: Biological Process	GO:1902882	regulation of response to oxidative stress	GeneOntologyBiologicalProcess_GO:1902882_regulation of response to oxidative stress	3.10037	LRRK2,NGB,SNCA,SOD1
1276	GO: Biological Process	GO:0046324	regulation of glucose import	GeneOntologyBiologicalProcess_GO:0046324_regulation of glucose import	3.10037	ACE,AGT,IGF1,PRKCA
1277	GO: Biological Process	GO:0002026	regulation of the force of heart contraction	GeneOntologyBiologicalProcess_GO:0002026_regulation of the force of heart contraction	3.09986	ADRB2,NOS1,PRKCA
1278	GO: Biological Process	GO:0042982	amyloid precursor protein metabolic process	GeneOntologyBiologicalProcess_GO:0042982_amyloid precursor protein metabolic process	3.09986	APOE,PSEN1,PSEN2
1279	GO: Biological Process	GO:0021894	cerebral cortex GABAergic interneuron development	GeneOntologyBiologicalProcess_GO:0021894_cerebral cortex GABAergic interneuron development	3.08091	DRD1,DRD2
1280	GO: Biological Process	GO:1903431	positive regulation of cell maturation	GeneOntologyBiologicalProcess_GO:1903431_positive regulation of cell maturation	3.08091	BCL2,NGF
1281	GO: Biological Process	GO:0042421	norepinephrine biosynthetic process	GeneOntologyBiologicalProcess_GO:0042421_norepinephrine biosynthetic process	3.08091	DBH,TH
1282	GO: Biological Process	GO:0008090	retrograde axonal transport	GeneOntologyBiologicalProcess_GO:0008090_retrograde axonal transport	3.08091	PAFAH1B1,SOD1
1284	GO: Biological Process	GO:0003321	positive regulation of blood pressure by epinephrine-norepinephrine	GeneOntologyBiologicalProcess_GO:0003321_positive regulation of blood pressure by epinephrine-norepinephrine	3.08091	ADRB2,DRD5
1285	GO: Biological Process	GO:0033860	regulation of NAD(P)H oxidase activity	GeneOntologyBiologicalProcess_GO:0033860_regulation of NAD(P)H oxidase activity	3.08091	AGT,DRD5
1286	GO: Biological Process	GO:0060179	male mating behavior	GeneOntologyBiologicalProcess_GO:0060179_male mating behavior	3.08091	AR,GRIN1
1287	GO: Biological Process	GO:0035725	sodium ion transmembrane transport	GeneOntologyBiologicalProcess_GO:0035725_sodium ion transmembrane transport	3.07937	AGT,DRD3,DRD4,NOS1,SCN1A
1288	GO: Biological Process	GO:0045931	positive regulation of mitotic cell cycle	GeneOntologyBiologicalProcess_GO:0045931_positive regulation of mitotic cell cycle	3.07937	APP,DRD3,IGF1,PAFAH1B1,PRKCA
1289	GO: Biological Process	GO:0009913	epidermal cell differentiation	GeneOntologyBiologicalProcess_GO:0009913_epidermal cell differentiation	3.06654	ATP2B2,CASP3,CTNNB1,KCNMA1,PAFAH1B1,SOD1
1290	GO: Biological Process	GO:0034329	cell junction assembly	GeneOntologyBiologicalProcess_GO:0034329_cell junction assembly	3.06654	ACE,ACE2,AGT,BCL2,CTNNB1,PRKCA
1291	GO: Biological Process	GO:0045940	positive regulation of steroid metabolic process	GeneOntologyBiologicalProcess_GO:0045940_positive regulation of steroid metabolic process	3.06148	AGT,APOE,IGF1
1292	GO: Biological Process	GO:0060479	lung cell differentiation	GeneOntologyBiologicalProcess_GO:0060479_lung cell differentiation	3.06148	CTNNB1,IGF1,NKX2-1
1293	GO: Biological Process	GO:0014909	smooth muscle cell migration	GeneOntologyBiologicalProcess_GO:0014909_smooth muscle cell migration	3.05739	ACE,AGT,BCL2,IGF1
1294	GO: Biological Process	GO:1901654	response to ketone	GeneOntologyBiologicalProcess_GO:1901654_response to ketone	3.0553	ADH1C,ADRB2,AGTR2,GNAS,SLC18A2,TH
1295	GO: Biological Process	GO:0045807	positive regulation of endocytosis	GeneOntologyBiologicalProcess_GO:0045807_positive regulation of endocytosis	3.04999	DRD2,FMR1,NLGN1,SNCA,SYNJ1
1296	GO: Biological Process	GO:0008203	cholesterol metabolic process	GeneOntologyBiologicalProcess_GO:0008203_cholesterol metabolic process	3.04999	APOE,APP,NPC1,SOD1,VLDLR
1297	GO: Biological Process	GO:0006970	response to osmotic stress	GeneOntologyBiologicalProcess_GO:0006970_response to osmotic stress	3.03636	AGT,KCNMA1,NKX2-1,TH
1298	GO: Biological Process	GO:0035690	cellular response to drug	GeneOntologyBiologicalProcess_GO:0035690_cellular response to drug	3.03636	BRAF,PPP3CB,SLC18A2,TH
1299	GO: Biological Process	GO:0051896	regulation of protein kinase B signaling	GeneOntologyBiologicalProcess_GO:0051896_regulation of protein kinase B signaling	3.03548	DRD2,DRD3,IGF1,NTRK2,TSC2
1300	GO: Biological Process	GO:0046209	nitric oxide metabolic process	GeneOntologyBiologicalProcess_GO:0046209_nitric oxide metabolic process	3.01562	AGT,AGTR2,IGF1,NOS1
1301	GO: Biological Process	GO:0072078	nephron tubule morphogenesis	GeneOntologyBiologicalProcess_GO:0072078_nephron tubule morphogenesis	3.01562	AGT,AGTR2,BCL2,CTNNB1
1302	GO: Biological Process	GO:0071229	cellular response to acid chemical	GeneOntologyBiologicalProcess_GO:0071229_cellular response to acid chemical	3.00008	BDNF,GNAS,GRIN2A,NGF,NTRK2,SLC6A4
1303	GO: Biological Process	GO:0070371	ERK1 and ERK2 cascade	GeneOntologyBiologicalProcess_GO:0070371_ERK1 and ERK2 cascade	2.99374	ACE2,AGT,BRAF,DRD2,IGF1,NTRK1,PRKCA
1304	GO: Biological Process	GO:0051385	response to mineralocorticoid	GeneOntologyBiologicalProcess_GO:0051385_response to mineralocorticoid	2.98825	KRAS,SLC18A2,TH
1305	GO: Biological Process	GO:0060441	epithelial tube branching involved in lung morphogenesis	GeneOntologyBiologicalProcess_GO:0060441_epithelial tube branching involved in lung morphogenesis	2.98825	CTNNB1,KRAS,NKX2-1
1306	GO: Biological Process	GO:0003002	regionalization	GeneOntologyBiologicalProcess_GO:0003002_regionalization	2.98388	AR,CTNNB1,NKX2-1,NTF4,PBX3,PSEN1,PSEN2,RELN
1307	GO: Biological Process	GO:0018130	heterocycle biosynthetic process	GeneOntologyBiologicalProcess_GO:0018130_heterocycle biosynthetic process	2.98168	ADORA2A,ADRB2,AGT,AGTR2,APOE,APP,AR,BDNF,CDK5,CDK5R1,CTNNB1,DACH1,DRD1,DRD2,DRD3,DRD4,DRD5,GNAS,GRIN1,GRM7,HDC,IGF1,KRAS,MECP2,NGF,NKX2-1,NOS1,NTRK1,PBX3,PPP3CB,PRKCA,PSEN1,PSEN2,RELN,SNCA,TPH2,TSC2,VLDLR,WWC1
1308	GO: Biological Process	GO:1902652	secondary alcohol metabolic process	GeneOntologyBiologicalProcess_GO:1902652_secondary alcohol metabolic process	2.97868	APOE,APP,NPC1,SOD1,VLDLR
1309	GO: Biological Process	GO:0072088	nephron epithelium morphogenesis	GeneOntologyBiologicalProcess_GO:0072088_nephron epithelium morphogenesis	2.97501	AGT,AGTR2,BCL2,CTNNB1
1310	GO: Biological Process	GO:0010873	positive regulation of cholesterol esterification	GeneOntologyBiologicalProcess_GO:0010873_positive regulation of cholesterol esterification	2.97334	AGT,APOE
1312	GO: Biological Process	GO:0097105	presynaptic membrane assembly	GeneOntologyBiologicalProcess_GO:0097105_presynaptic membrane assembly	2.97334	IL1RAPL1,NLGN1
1313	GO: Biological Process	GO:0035095	behavioral response to nicotine	GeneOntologyBiologicalProcess_GO:0035095_behavioral response to nicotine	2.97334	CHRNA4,CHRNA7
1314	GO: Biological Process	GO:0021830	interneuron migration from the subpallium to the cortex	GeneOntologyBiologicalProcess_GO:0021830_interneuron migration from the subpallium to the cortex	2.97334	DRD1,DRD2
1315	GO: Biological Process	GO:0038180	nerve growth factor signaling pathway	GeneOntologyBiologicalProcess_GO:0038180_nerve growth factor signaling pathway	2.97334	NGF,NTRK1
1316	GO: Biological Process	GO:0060242	contact inhibition	GeneOntologyBiologicalProcess_GO:0060242_contact inhibition	2.97334	DACH1,PAK1
1317	GO: Biological Process	GO:0001993	regulation of systemic arterial blood pressure by norepinephrine-epinephrine	GeneOntologyBiologicalProcess_GO:0001993_regulation of systemic arterial blood pressure by norepinephrine-epinephrine	2.97334	ADRB2,DRD5
1319	GO: Biological Process	GO:0006886	intracellular protein transport	GeneOntologyBiologicalProcess_GO:0006886_intracellular protein transport	2.96507	ADORA1,AGT,AGTR2,CDK5,CDK5R1,CTNNB1,DRD1,GRIK2,IGF1,LRRK2,NLGN1,PACS1,PEX13,PPP3CB,TSC2
1320	GO: Biological Process	GO:0048839	inner ear development	GeneOntologyBiologicalProcess_GO:0048839_inner ear development	2.95704	ATP2B2,BDNF,IGF1,KCNMA1,PAFAH1B1,SOD1
1321	GO: Biological Process	GO:0008038	neuron recognition	GeneOntologyBiologicalProcess_GO:0008038_neuron recognition	2.95327	APP,BDNF,CDK5R1
1322	GO: Biological Process	GO:0048016	inositol phosphate-mediated signaling	GeneOntologyBiologicalProcess_GO:0048016_inositol phosphate-mediated signaling	2.95327	IGF1,ITPR3,PPP3CB
1323	GO: Biological Process	GO:0071496	cellular response to external stimulus	GeneOntologyBiologicalProcess_GO:0071496_cellular response to external stimulus	2.94117	AGT,BCL2,COMT,CTNNB1,LRRK2,NOS1,VLDLR
1324	GO: Biological Process	GO:1903320	regulation of protein modification by small protein conjugation or removal	GeneOntologyBiologicalProcess_GO:1903320_regulation of protein modification by small protein conjugation or removal	2.94117	ADRB2,CDK5,CTNNB1,LRRK2,NGF,PSEN1,PSEN2
1325	GO: Biological Process	GO:2001057	reactive nitrogen species metabolic process	GeneOntologyBiologicalProcess_GO:2001057_reactive nitrogen species metabolic process	2.93551	AGT,AGTR2,IGF1,NOS1
1326	GO: Biological Process	GO:0021536	diencephalon development	GeneOntologyBiologicalProcess_GO:0021536_diencephalon development	2.93551	DRD2,NKX2-1,SLC6A3,SLC6A4
1327	GO: Biological Process	GO:0097192	extrinsic apoptotic signaling pathway in absence of ligand	GeneOntologyBiologicalProcess_GO:0097192_extrinsic apoptotic signaling pathway in absence of ligand	2.93551	BCL2,CASP3,IGF1,NGF
1328	GO: Biological Process	GO:0038034	signal transduction in absence of ligand	GeneOntologyBiologicalProcess_GO:0038034_signal transduction in absence of ligand	2.93551	BCL2,CASP3,IGF1,NGF
1329	GO: Biological Process	GO:0072028	nephron morphogenesis	GeneOntologyBiologicalProcess_GO:0072028_nephron morphogenesis	2.93551	AGT,AGTR2,BCL2,CTNNB1
1330	GO: Biological Process	GO:0001822	kidney development	GeneOntologyBiologicalProcess_GO:0001822_kidney development	2.93254	ACE,AGT,AGTR2,BCL2,BDNF,CTNNB1,LRRK2
1331	GO: Biological Process	GO:0071456	cellular response to hypoxia	GeneOntologyBiologicalProcess_GO:0071456_cellular response to hypoxia	2.92372	ADRB2,BCL2,DRD1,KCND2,VLDLR
1332	GO: Biological Process	GO:0070507	regulation of microtubule cytoskeleton organization	GeneOntologyBiologicalProcess_GO:0070507_regulation of microtubule cytoskeleton organization	2.92372	CDK5R1,CTNNB1,MAPT,PAFAH1B1,SNCA
1333	GO: Biological Process	GO:0061333	renal tubule morphogenesis	GeneOntologyBiologicalProcess_GO:0061333_renal tubule morphogenesis	2.91615	AGT,AGTR2,BCL2,CTNNB1
1334	GO: Biological Process	GO:0002573	myeloid leukocyte differentiation	GeneOntologyBiologicalProcess_GO:0002573_myeloid leukocyte differentiation	2.9046	CTNNB1,GNAS,PAFAH1B1,PRKCA,PSEN1,PSEN2
1335	GO: Biological Process	GO:0051056	regulation of small GTPase mediated signal transduction	GeneOntologyBiologicalProcess_GO:0051056_regulation of small GTPase mediated signal transduction	2.89839	APOE,IGF1,KALRN,KRAS,NTRK1,RELN,TSC2
1336	GO: Biological Process	GO:0050848	regulation of calcium-mediated signaling	GeneOntologyBiologicalProcess_GO:0050848_regulation of calcium-mediated signaling	2.89704	DRD4,IGF1,LRRK2,NOS1
1337	GO: Biological Process	GO:0031056	regulation of histone modification	GeneOntologyBiologicalProcess_GO:0031056_regulation of histone modification	2.89691	CTNNB1,FMR1,MECP2,NOS1,SNCA
1338	GO: Biological Process	GO:0072594	establishment of protein localization to organelle	GeneOntologyBiologicalProcess_GO:0072594_establishment of protein localization to organelle	2.89221	AGT,AGTR2,BCL2,CTNNB1,DRD1,IGF1,LRRK2,PACS1,PEX13,PPP3CB,TSC2
1339	GO: Biological Process	GO:0090596	sensory organ morphogenesis	GeneOntologyBiologicalProcess_GO:0090596_sensory organ morphogenesis	2.88994	ATP2B2,BCL2,BDNF,CTNNB1,NTRK2,SOD1,TH
1340	GO: Biological Process	GO:0051726	regulation of cell cycle	GeneOntologyBiologicalProcess_GO:0051726_regulation of cell cycle	2.88779	APP,BCL2,CASP3,CDK5,CDK5R1,CTNNB1,DACH1,DRD2,DRD3,IGF1,PAFAH1B1,PRKCA,SLC6A4,TSC2
1341	GO: Biological Process	GO:0031128	developmental induction	GeneOntologyBiologicalProcess_GO:0031128_developmental induction	2.88627	AR,CTNNB1,NKX2-1
1342	GO: Biological Process	GO:0044848	biological phase	GeneOntologyBiologicalProcess_GO:0044848_biological phase	2.88627	NKX2-1,PSEN1,PSEN2
1343	GO: Biological Process	GO:0048009	insulin-like growth factor receptor signaling pathway	GeneOntologyBiologicalProcess_GO:0048009_insulin-like growth factor receptor signaling pathway	2.88627	AR,IGF1,TSC2
1344	GO: Biological Process	GO:0010559	regulation of glycoprotein biosynthetic process	GeneOntologyBiologicalProcess_GO:0010559_regulation of glycoprotein biosynthetic process	2.88627	BCL2,CTNNB1,IGF1
1345	GO: Biological Process	GO:0042542	response to hydrogen peroxide	GeneOntologyBiologicalProcess_GO:0042542_response to hydrogen peroxide	2.88366	BCL2,CASP3,LRRK2,NGB,SOD1
1346	GO: Biological Process	GO:2000059	negative regulation of protein ubiquitination involved in ubiquitin-dependent protein catabolic process	GeneOntologyBiologicalProcess_GO:2000059_negative regulation of protein ubiquitination involved in ubiquitin-dependent protein catabolic process	2.87799	PSEN1,PSEN2
1347	GO: Biological Process	GO:0014052	regulation of gamma-aminobutyric acid secretion	GeneOntologyBiologicalProcess_GO:0014052_regulation of gamma-aminobutyric acid secretion	2.87799	ABAT,GRIK1
1348	GO: Biological Process	GO:1901629	regulation of presynaptic membrane organization	GeneOntologyBiologicalProcess_GO:1901629_regulation of presynaptic membrane organization	2.87799	APOE,NLGN1
1349	GO: Biological Process	GO:0097119	postsynaptic density protein 95 clustering	GeneOntologyBiologicalProcess_GO:0097119_postsynaptic density protein 95 clustering	2.87799	NLGN1,RELN
1350	GO: Biological Process	GO:0031223	auditory behavior	GeneOntologyBiologicalProcess_GO:0031223_auditory behavior	2.87799	DRD2,SLC1A3
1351	GO: Biological Process	GO:0042048	olfactory behavior	GeneOntologyBiologicalProcess_GO:0042048_olfactory behavior	2.87799	DRD4,GRIN1
1352	GO: Biological Process	GO:0007175	negative regulation of epidermal growth factor-activated receptor activity	GeneOntologyBiologicalProcess_GO:0007175_negative regulation of epidermal growth factor-activated receptor activity	2.87799	PSEN1,PSEN2
1353	GO: Biological Process	GO:0009635	response to herbicide	GeneOntologyBiologicalProcess_GO:0009635_response to herbicide	2.87799	SLC18A2,TH
1354	GO: Biological Process	GO:0016125	sterol metabolic process	GeneOntologyBiologicalProcess_GO:0016125_sterol metabolic process	2.87051	APOE,APP,NPC1,SOD1,VLDLR
1355	GO: Biological Process	GO:0051279	regulation of release of sequestered calcium ion into cytosol	GeneOntologyBiologicalProcess_GO:0051279_regulation of release of sequestered calcium ion into cytosol	2.85958	DRD1,NGF,NOS1,SNCA
1356	GO: Biological Process	GO:0072073	kidney epithelium development	GeneOntologyBiologicalProcess_GO:0072073_kidney epithelium development	2.85747	AGT,AGTR2,BCL2,BDNF,CTNNB1
1357	GO: Biological Process	GO:0051898	negative regulation of protein kinase B signaling	GeneOntologyBiologicalProcess_GO:0051898_negative regulation of protein kinase B signaling	2.85415	DRD2,DRD3,TSC2
1358	GO: Biological Process	GO:0046579	positive regulation of Ras protein signal transduction	GeneOntologyBiologicalProcess_GO:0046579_positive regulation of Ras protein signal transduction	2.85415	IGF1,KRAS,NTRK1
1359	GO: Biological Process	GO:0030865	cortical cytoskeleton organization	GeneOntologyBiologicalProcess_GO:0030865_cortical cytoskeleton organization	2.85415	CDK5,NLGN1,PAFAH1B1
1360	GO: Biological Process	GO:0002090	regulation of receptor internalization	GeneOntologyBiologicalProcess_GO:0002090_regulation of receptor internalization	2.85415	DLG4,DRD2,FMR1
1361	GO: Biological Process	GO:0048608	reproductive structure development	GeneOntologyBiologicalProcess_GO:0048608_reproductive structure development	2.84381	AGT,AR,BCL2,CHAT,CTNNB1,IGF1,NKX2-1,NTRK1,SOD1
1362	GO: Biological Process	GO:0030324	lung development	GeneOntologyBiologicalProcess_GO:0030324_lung development	2.84356	ACE,CTNNB1,IGF1,KRAS,NKX2-1,PSEN2
1363	GO: Biological Process	GO:0006606	protein import into nucleus	GeneOntologyBiologicalProcess_GO:0006606_protein import into nucleus	2.83997	AGT,AGTR2,CTNNB1,DRD1,IGF1,PPP3CB,TSC2
1364	GO: Biological Process	GO:0045934	negative regulation of nucleobase-containing compound metabolic process	GeneOntologyBiologicalProcess_GO:0045934_negative regulation of nucleobase-containing compound metabolic process	2.83325	AR,CDK5,CDK5R1,CTNNB1,DACH1,DRD2,DRD3,DRD4,DYRK1A,GRM7,MECP2,NKX2-1,PRKCA,PSEN1,PSEN2,SNCA,VLDLR,WWC1
1365	GO: Biological Process	GO:0016042	lipid catabolic process	GeneOntologyBiologicalProcess_GO:0016042_lipid catabolic process	2.83176	ADORA1,ADRB2,APOE,DRD1,FAAH,PAFAH1B1,PEX13
1366	GO: Biological Process	GO:0036294	cellular response to decreased oxygen levels	GeneOntologyBiologicalProcess_GO:0036294_cellular response to decreased oxygen levels	2.8317	ADRB2,BCL2,DRD1,KCND2,VLDLR
1367	GO: Biological Process	GO:0014066	regulation of phosphatidylinositol 3-kinase signaling	GeneOntologyBiologicalProcess_GO:0014066_regulation of phosphatidylinositol 3-kinase signaling	2.8317	AGT,IGF1,NTRK2,RELN,TSC2
1368	GO: Biological Process	GO:0014812	muscle cell migration	GeneOntologyBiologicalProcess_GO:0014812_muscle cell migration	2.82306	ACE,AGT,BCL2,IGF1
1369	GO: Biological Process	GO:0001708	cell fate specification	GeneOntologyBiologicalProcess_GO:0001708_cell fate specification	2.82306	AR,CTNNB1,PSEN1,PSEN2
1370	GO: Biological Process	GO:0045823	positive regulation of heart contraction	GeneOntologyBiologicalProcess_GO:0045823_positive regulation of heart contraction	2.82289	ACE2,ADRB2,CHRNA7
1371	GO: Biological Process	GO:0061458	reproductive system development	GeneOntologyBiologicalProcess_GO:0061458_reproductive system development	2.81919	AGT,AR,BCL2,CHAT,CTNNB1,IGF1,NKX2-1,NTRK1,SOD1
1372	GO: Biological Process	GO:0051262	protein tetramerization	GeneOntologyBiologicalProcess_GO:0051262_protein tetramerization	2.80631	GRIN1,GRIN2A,KCNMA1,NLGN1,SRR
1373	GO: Biological Process	GO:0046887	positive regulation of hormone secretion	GeneOntologyBiologicalProcess_GO:0046887_positive regulation of hormone secretion	2.80631	ABAT,CASR,DRD2,PPP3CB,SNAP25
1374	GO: Biological Process	GO:0032091	negative regulation of protein binding	GeneOntologyBiologicalProcess_GO:0032091_negative regulation of protein binding	2.80515	ACE,ADRB2,LRRK2,PSEN2
1375	GO: Biological Process	GO:0030323	respiratory tube development	GeneOntologyBiologicalProcess_GO:0030323_respiratory tube development	2.80396	ACE,CTNNB1,IGF1,KRAS,NKX2-1,PSEN2
1376	GO: Biological Process	GO:0051090	regulation of DNA binding transcription factor activity	GeneOntologyBiologicalProcess_GO:0051090_regulation of DNA binding transcription factor activity	2.80361	AGT,AR,BDNF,CTNNB1,KRAS,NGF,NTRK1,RELN
1377	GO: Biological Process	GO:0051224	negative regulation of protein transport	GeneOntologyBiologicalProcess_GO:0051224_negative regulation of protein transport	2.7942	CDK5,DRD2,DRD3,DRD4,LRRK2,NOS1
1378	GO: Biological Process	GO:0002065	columnar/cuboidal epithelial cell differentiation	GeneOntologyBiologicalProcess_GO:0002065_columnar/cuboidal epithelial cell differentiation	2.79377	ATP2B2,BCL2,KCNMA1,PAFAH1B1,SOD1
1379	GO: Biological Process	GO:0014014	negative regulation of gliogenesis	GeneOntologyBiologicalProcess_GO:0014014_negative regulation of gliogenesis	2.79244	CTNNB1,DRD3,MECP2
1380	GO: Biological Process	GO:0042755	eating behavior	GeneOntologyBiologicalProcess_GO:0042755_eating behavior	2.79244	ACE,ADORA2A,TH
1381	GO: Biological Process	GO:0048672	positive regulation of collateral sprouting	GeneOntologyBiologicalProcess_GO:0048672_positive regulation of collateral sprouting	2.79241	BDNF,NGF
1382	GO: Biological Process	GO:0015810	aspartate transport	GeneOntologyBiologicalProcess_GO:0015810_aspartate transport	2.79241	ABAT,SLC1A3
1383	GO: Biological Process	GO:0090331	negative regulation of platelet aggregation	GeneOntologyBiologicalProcess_GO:0090331_negative regulation of platelet aggregation	2.79241	ABAT,ADRB2
1384	GO: Biological Process	GO:0018119	peptidyl-cysteine S-nitrosylation	GeneOntologyBiologicalProcess_GO:0018119_peptidyl-cysteine S-nitrosylation	2.79241	ACE,NOS1
1385	GO: Biological Process	GO:2000650	negative regulation of sodium ion transmembrane transporter activity	GeneOntologyBiologicalProcess_GO:2000650_negative regulation of sodium ion transmembrane transporter activity	2.79241	AGT,DRD3
1386	GO: Biological Process	GO:0048755	branching morphogenesis of a nerve	GeneOntologyBiologicalProcess_GO:0048755_branching morphogenesis of a nerve	2.79241	DRD2,LRRK2
1387	GO: Biological Process	GO:0010872	regulation of cholesterol esterification	GeneOntologyBiologicalProcess_GO:0010872_regulation of cholesterol esterification	2.79241	AGT,APOE
1388	GO: Biological Process	GO:0043589	skin morphogenesis	GeneOntologyBiologicalProcess_GO:0043589_skin morphogenesis	2.79241	PSEN1,PSEN2
1390	GO: Biological Process	GO:0060992	response to fungicide	GeneOntologyBiologicalProcess_GO:0060992_response to fungicide	2.79241	GRIA3,GRIN1
1391	GO: Biological Process	GO:0034374	low-density lipoprotein particle remodeling	GeneOntologyBiologicalProcess_GO:0034374_low-density lipoprotein particle remodeling	2.79241	AGT,APOE
1392	GO: Biological Process	GO:0006570	tyrosine metabolic process	GeneOntologyBiologicalProcess_GO:0006570_tyrosine metabolic process	2.79241	TH,TYR
1393	GO: Biological Process	GO:0014706	striated muscle tissue development	GeneOntologyBiologicalProcess_GO:0014706_striated muscle tissue development	2.78982	ADRB2,AGT,AGTR2,BCL2,BDNF,CDK5,CTNNB1,KCNAB1
1394	GO: Biological Process	GO:0072001	renal system development	GeneOntologyBiologicalProcess_GO:0072001_renal system development	2.78322	ACE,AGT,AGTR2,BCL2,BDNF,CTNNB1,LRRK2
1395	GO: Biological Process	GO:0006357	regulation of transcription by RNA polymerase II	GeneOntologyBiologicalProcess_GO:0006357_regulation of transcription by RNA polymerase II	2.77914	ADRB2,APP,AR,CTNNB1,DACH1,DRD2,DRD3,GNAS,GRIN1,IGF1,MECP2,NKX2-1,NOS1,PBX3,PPP3CB,PSEN1,PSEN2,SNCA,TSC2,VLDLR,WWC1
1396	GO: Biological Process	GO:0030193	regulation of blood coagulation	GeneOntologyBiologicalProcess_GO:0030193_regulation of blood coagulation	2.76998	ABAT,ADRB2,APOE,PRKCA
1397	GO: Biological Process	GO:1900046	regulation of hemostasis	GeneOntologyBiologicalProcess_GO:1900046_regulation of hemostasis	2.76998	ABAT,ADRB2,APOE,PRKCA
1398	GO: Biological Process	GO:0046620	regulation of organ growth	GeneOntologyBiologicalProcess_GO:0046620_regulation of organ growth	2.76998	AGT,SLC6A4,SOD1,WWC1
1399	GO: Biological Process	GO:0009755	hormone-mediated signaling pathway	GeneOntologyBiologicalProcess_GO:0009755_hormone-mediated signaling pathway	2.76521	AR,BDNF,CTNNB1,IGF1,NTRK2,PAK1
1400	GO: Biological Process	GO:0043268	positive regulation of potassium ion transport	GeneOntologyBiologicalProcess_GO:0043268_positive regulation of potassium ion transport	2.76277	ADORA1,ADRB2,DRD1
1401	GO: Biological Process	GO:0010611	regulation of cardiac muscle hypertrophy	GeneOntologyBiologicalProcess_GO:0010611_regulation of cardiac muscle hypertrophy	2.76277	AGT,IGF1,PRKCA
1402	GO: Biological Process	GO:1901031	regulation of response to reactive oxygen species	GeneOntologyBiologicalProcess_GO:1901031_regulation of response to reactive oxygen species	2.76277	LRRK2,NGB,SNCA
1403	GO: Biological Process	GO:0044088	regulation of vacuole organization	GeneOntologyBiologicalProcess_GO:0044088_regulation of vacuole organization	2.76277	ADRB2,LRRK2,SYNJ1
1404	GO: Biological Process	GO:2000649	regulation of sodium ion transmembrane transporter activity	GeneOntologyBiologicalProcess_GO:2000649_regulation of sodium ion transmembrane transporter activity	2.76277	AGT,DRD3,DRD4
1405	GO: Biological Process	GO:1903827	regulation of cellular protein localization	GeneOntologyBiologicalProcess_GO:1903827_regulation of cellular protein localization	2.75662	AGTR2,AR,BCL2,CDK5,CDK5R1,CTNNB1,IGF1,KALRN,LRRK2,PPP3CB
1406	GO: Biological Process	GO:0045216	cell-cell junction organization	GeneOntologyBiologicalProcess_GO:0045216_cell-cell junction organization	2.75565	ACE,ACE2,AGT,BCL2,CTNNB1,PRKCA
1407	GO: Biological Process	GO:0042439	ethanolamine-containing compound metabolic process	GeneOntologyBiologicalProcess_GO:0042439_ethanolamine-containing compound metabolic process	2.75271	CHAT,DBH,MECP2,PAFAH1B1
1408	GO: Biological Process	GO:0030155	regulation of cell adhesion	GeneOntologyBiologicalProcess_GO:0030155_regulation of cell adhesion	2.75243	ABAT,ADORA2A,ADRB2,BCL2,BRAF,CASP3,CTNNB1,IGF1,PAK1,PRKCA,SOD1
1409	GO: Biological Process	GO:0000187	activation of MAPK activity	GeneOntologyBiologicalProcess_GO:0000187_activation of MAPK activity	2.74452	CHRNA7,DRD4,IGF1,LRRK2,SOD1
1410	GO: Biological Process	GO:0046395	carboxylic acid catabolic process	GeneOntologyBiologicalProcess_GO:0046395_carboxylic acid catabolic process	2.73667	ABAT,FAAH,GAD1,HDC,NOS1,PEX13
1411	GO: Biological Process	GO:0016054	organic acid catabolic process	GeneOntologyBiologicalProcess_GO:0016054_organic acid catabolic process	2.73667	ABAT,FAAH,GAD1,HDC,NOS1,PEX13
1412	GO: Biological Process	GO:0007517	muscle organ development	GeneOntologyBiologicalProcess_GO:0007517_muscle organ development	2.73557	ADRB2,BCL2,BDNF,CDK5,CHAT,CTNNB1,IGF1,KCNAB1
1413	GO: Biological Process	GO:0021983	pituitary gland development	GeneOntologyBiologicalProcess_GO:0021983_pituitary gland development	2.73384	DRD2,NKX2-1,SLC6A3
1414	GO: Biological Process	GO:1903018	regulation of glycoprotein metabolic process	GeneOntologyBiologicalProcess_GO:1903018_regulation of glycoprotein metabolic process	2.73384	BCL2,CTNNB1,IGF1
1415	GO: Biological Process	GO:0071453	cellular response to oxygen levels	GeneOntologyBiologicalProcess_GO:0071453_cellular response to oxygen levels	2.73244	ADRB2,BCL2,DRD1,KCND2,VLDLR
1416	GO: Biological Process	GO:0032941	secretion by tissue	GeneOntologyBiologicalProcess_GO:0032941_secretion by tissue	2.7188	ADORA1,ATP2B2,KCNMA1,SLC6A3
1417	GO: Biological Process	GO:0007043	cell-cell junction assembly	GeneOntologyBiologicalProcess_GO:0007043_cell-cell junction assembly	2.7188	ACE,ACE2,AGT,PRKCA
1419	GO: Biological Process	GO:0042640	anagen	GeneOntologyBiologicalProcess_GO:0042640_anagen	2.7148	PSEN1,PSEN2
1420	GO: Biological Process	GO:2000322	regulation of glucocorticoid receptor signaling pathway	GeneOntologyBiologicalProcess_GO:2000322_regulation of glucocorticoid receptor signaling pathway	2.7148	BDNF,NTRK2
1421	GO: Biological Process	GO:0017014	protein nitrosylation	GeneOntologyBiologicalProcess_GO:0017014_protein nitrosylation	2.7148	ACE,NOS1
1422	GO: Biological Process	GO:1902306	negative regulation of sodium ion transmembrane transport	GeneOntologyBiologicalProcess_GO:1902306_negative regulation of sodium ion transmembrane transport	2.7148	AGT,DRD3
1423	GO: Biological Process	GO:0032930	positive regulation of superoxide anion generation	GeneOntologyBiologicalProcess_GO:0032930_positive regulation of superoxide anion generation	2.7148	AGT,SOD1
1424	GO: Biological Process	GO:0070471	uterine smooth muscle contraction	GeneOntologyBiologicalProcess_GO:0070471_uterine smooth muscle contraction	2.7148	ABAT,AGT
1425	GO: Biological Process	GO:0001973	adenosine receptor signaling pathway	GeneOntologyBiologicalProcess_GO:0001973_adenosine receptor signaling pathway	2.7148	ADORA1,ADORA2A
1426	GO: Biological Process	GO:0034205	amyloid-beta formation	GeneOntologyBiologicalProcess_GO:0034205_amyloid-beta formation	2.7148	APOE,PSEN1
1427	GO: Biological Process	GO:0033148	positive regulation of intracellular estrogen receptor signaling pathway	GeneOntologyBiologicalProcess_GO:0033148_positive regulation of intracellular estrogen receptor signaling pathway	2.7148	AR,PAK1
1428	GO: Biological Process	GO:0007018	microtubule-based movement	GeneOntologyBiologicalProcess_GO:0007018_microtubule-based movement	2.70858	APP,MAPT,NGF,NTRK1,PAFAH1B1,SOD1
1429	GO: Biological Process	GO:1904036	negative regulation of epithelial cell apoptotic process	GeneOntologyBiologicalProcess_GO:1904036_negative regulation of epithelial cell apoptotic process	2.70561	BRAF,IGF1,NGF
1430	GO: Biological Process	GO:0014743	regulation of muscle hypertrophy	GeneOntologyBiologicalProcess_GO:0014743_regulation of muscle hypertrophy	2.70561	AGT,IGF1,PRKCA
1431	GO: Biological Process	GO:0043154	negative regulation of cysteine-type endopeptidase activity involved in apoptotic process	GeneOntologyBiologicalProcess_GO:0043154_negative regulation of cysteine-type endopeptidase activity involved in apoptotic process	2.70214	ADORA2A,IGF1,NGF,SNCA
1432	GO: Biological Process	GO:1904950	negative regulation of establishment of protein localization	GeneOntologyBiologicalProcess_GO:1904950_negative regulation of establishment of protein localization	2.69932	CDK5,DRD2,DRD3,DRD4,LRRK2,NOS1
1433	GO: Biological Process	GO:0043491	protein kinase B signaling	GeneOntologyBiologicalProcess_GO:0043491_protein kinase B signaling	2.69672	DRD2,DRD3,IGF1,NTRK2,TSC2
1434	GO: Biological Process	GO:0006941	striated muscle contraction	GeneOntologyBiologicalProcess_GO:0006941_striated muscle contraction	2.69672	ACE2,ADORA1,ADRB2,NOS1,PSEN2
1435	GO: Biological Process	GO:0051170	nuclear import	GeneOntologyBiologicalProcess_GO:0051170_nuclear import	2.68958	AGT,AGTR2,CTNNB1,DRD1,IGF1,PPP3CB,TSC2
1436	GO: Biological Process	GO:0042692	muscle cell differentiation	GeneOntologyBiologicalProcess_GO:0042692_muscle cell differentiation	2.68922	AGT,AGTR2,BCL2,CTNNB1,IGF1,KCNAB1,KRAS,NOS1
1437	GO: Biological Process	GO:0008652	cellular amino acid biosynthetic process	GeneOntologyBiologicalProcess_GO:0008652_cellular amino acid biosynthetic process	2.68568	ABAT,GAD1,SLC1A3,SRR
1438	GO: Biological Process	GO:1901800	positive regulation of proteasomal protein catabolic process	GeneOntologyBiologicalProcess_GO:1901800_positive regulation of proteasomal protein catabolic process	2.68568	FMR1,LRRK2,PSEN1,PSEN2
1439	GO: Biological Process	GO:0001894	tissue homeostasis	GeneOntologyBiologicalProcess_GO:0001894_tissue homeostasis	2.68093	ADRB2,BCL2,CTNNB1,GNAS,KRAS,SOD1
1440	GO: Biological Process	GO:0046686	response to cadmium ion	GeneOntologyBiologicalProcess_GO:0046686_response to cadmium ion	2.67805	CTNNB1,NPC1,SOD1
1441	GO: Biological Process	GO:2000273	positive regulation of receptor activity	GeneOntologyBiologicalProcess_GO:2000273_positive regulation of receptor activity	2.67805	ADORA1,CDK5,RELN
1442	GO: Biological Process	GO:0045765	regulation of angiogenesis	GeneOntologyBiologicalProcess_GO:0045765_regulation of angiogenesis	2.6718	ADRB2,AGT,CHRNA7,CTNNB1,NTRK1,PRKCA
1443	GO: Biological Process	GO:0060537	muscle tissue development	GeneOntologyBiologicalProcess_GO:0060537_muscle tissue development	2.66967	ADRB2,AGT,AGTR2,BCL2,BDNF,CDK5,CTNNB1,KCNAB1
1444	GO: Biological Process	GO:0002027	regulation of heart rate	GeneOntologyBiologicalProcess_GO:0002027_regulation of heart rate	2.66941	AGT,AGTR2,CHRNA7,DRD2
1445	GO: Biological Process	GO:0072080	nephron tubule development	GeneOntologyBiologicalProcess_GO:0072080_nephron tubule development	2.66941	AGT,AGTR2,BCL2,CTNNB1
1446	GO: Biological Process	GO:0045778	positive regulation of ossification	GeneOntologyBiologicalProcess_GO:0045778_positive regulation of ossification	2.65332	ADRB2,CTNNB1,GNAS,IGF1
1447	GO: Biological Process	GO:2000117	negative regulation of cysteine-type endopeptidase activity	GeneOntologyBiologicalProcess_GO:2000117_negative regulation of cysteine-type endopeptidase activity	2.65332	ADORA2A,IGF1,NGF,SNCA
1448	GO: Biological Process	GO:0021545	cranial nerve development	GeneOntologyBiologicalProcess_GO:0021545_cranial nerve development	2.65114	CTNNB1,NTRK1,SLC1A3
1449	GO: Biological Process	GO:0061140	lung secretory cell differentiation	GeneOntologyBiologicalProcess_GO:0061140_lung secretory cell differentiation	2.64381	IGF1,NKX2-1
1450	GO: Biological Process	GO:0021936	regulation of cerebellar granule cell precursor proliferation	GeneOntologyBiologicalProcess_GO:0021936_regulation of cerebellar granule cell precursor proliferation	2.64381	IGF1,SLC6A4
1451	GO: Biological Process	GO:0061000	negative regulation of dendritic spine development	GeneOntologyBiologicalProcess_GO:0061000_negative regulation of dendritic spine development	2.64381	APOE,NLGN1
1452	GO: Biological Process	GO:0010766	negative regulation of sodium ion transport	GeneOntologyBiologicalProcess_GO:0010766_negative regulation of sodium ion transport	2.64381	AGT,DRD3
1453	GO: Biological Process	GO:0060088	auditory receptor cell stereocilium organization	GeneOntologyBiologicalProcess_GO:0060088_auditory receptor cell stereocilium organization	2.64381	ATP2B2,SOD1
1454	GO: Biological Process	GO:0021826	substrate-independent telencephalic tangential migration	GeneOntologyBiologicalProcess_GO:0021826_substrate-independent telencephalic tangential migration	2.64381	DRD1,DRD2
1455	GO: Biological Process	GO:0044090	positive regulation of vacuole organization	GeneOntologyBiologicalProcess_GO:0044090_positive regulation of vacuole organization	2.64381	ADRB2,SYNJ1
1456	GO: Biological Process	GO:0015740	C4-dicarboxylate transport	GeneOntologyBiologicalProcess_GO:0015740_C4-dicarboxylate transport	2.64381	ABAT,SLC1A3
1457	GO: Biological Process	GO:0021843	substrate-independent telencephalic tangential interneuron migration	GeneOntologyBiologicalProcess_GO:0021843_substrate-independent telencephalic tangential interneuron migration	2.64381	DRD1,DRD2
1459	GO: Biological Process	GO:0046710	GDP metabolic process	GeneOntologyBiologicalProcess_GO:0046710_GDP metabolic process	2.64381	DLG3,DLG4
1460	GO: Biological Process	GO:0007638	mechanosensory behavior	GeneOntologyBiologicalProcess_GO:0007638_mechanosensory behavior	2.64381	DRD2,SLC1A3
1461	GO: Biological Process	GO:0003006	developmental process involved in reproduction	GeneOntologyBiologicalProcess_GO:0003006_developmental process involved in reproduction	2.63873	AGT,AR,BCL2,CHAT,CTNNB1,DACH1,IGF1,NKX2-1,NTRK1,PAFAH1B1,SOD1
1462	GO: Biological Process	GO:0032103	positive regulation of response to external stimulus	GeneOntologyBiologicalProcess_GO:0032103_positive regulation of response to external stimulus	2.63697	ACE,ADRB2,AGT,BRAF,CASR,PRKCA,TSC2
1463	GO: Biological Process	GO:0014065	phosphatidylinositol 3-kinase signaling	GeneOntologyBiologicalProcess_GO:0014065_phosphatidylinositol 3-kinase signaling	2.62757	AGT,IGF1,NTRK2,RELN,TSC2
1464	GO: Biological Process	GO:0043029	T cell homeostasis	GeneOntologyBiologicalProcess_GO:0043029_T cell homeostasis	2.62485	BCL2,CASP3,PPP3CB
1465	GO: Biological Process	GO:0008631	intrinsic apoptotic signaling pathway in response to oxidative stress	GeneOntologyBiologicalProcess_GO:0008631_intrinsic apoptotic signaling pathway in response to oxidative stress	2.62485	BCL2,MAPT,SOD1
1466	GO: Biological Process	GO:0048599	oocyte development	GeneOntologyBiologicalProcess_GO:0048599_oocyte development	2.62485	BCL2,CTNNB1,IGF1
1467	GO: Biological Process	GO:1901068	guanosine-containing compound metabolic process	GeneOntologyBiologicalProcess_GO:1901068_guanosine-containing compound metabolic process	2.62485	DLG3,DLG4,LRRK2
1469	GO: Biological Process	GO:0043500	muscle adaptation	GeneOntologyBiologicalProcess_GO:0043500_muscle adaptation	2.6217	AGT,AR,IGF1,PRKCA
1470	GO: Biological Process	GO:0010951	negative regulation of endopeptidase activity	GeneOntologyBiologicalProcess_GO:0010951_negative regulation of endopeptidase activity	2.61802	ADORA2A,AGT,APP,IGF1,NGF,SNCA
1471	GO: Biological Process	GO:0030217	T cell differentiation	GeneOntologyBiologicalProcess_GO:0030217_T cell differentiation	2.61802	BCL2,BMX,BRAF,CTNNB1,PPP3CB,SOD1
1472	GO: Biological Process	GO:1902275	regulation of chromatin organization	GeneOntologyBiologicalProcess_GO:1902275_regulation of chromatin organization	2.61633	CTNNB1,FMR1,MECP2,NOS1,SNCA
1473	GO: Biological Process	GO:0061326	renal tubule development	GeneOntologyBiologicalProcess_GO:0061326_renal tubule development	2.60615	AGT,AGTR2,BCL2,CTNNB1
1474	GO: Biological Process	GO:0006644	phospholipid metabolic process	GeneOntologyBiologicalProcess_GO:0006644_phospholipid metabolic process	2.60582	CHAT,DRD1,DRD2,MECP2,NKX2-1,PAFAH1B1,SNCA,SYNJ1
1475	GO: Biological Process	GO:0046661	male sex differentiation	GeneOntologyBiologicalProcess_GO:0046661_male sex differentiation	2.60517	AR,BCL2,CTNNB1,NKX2-1,NTRK1
1476	GO: Biological Process	GO:0034599	cellular response to oxidative stress	GeneOntologyBiologicalProcess_GO:0034599_cellular response to oxidative stress	2.60045	BCL2,LRRK2,MAPT,NGB,SNCA,SOD1
1477	GO: Biological Process	GO:0031103	axon regeneration	GeneOntologyBiologicalProcess_GO:0031103_axon regeneration	2.59915	APOE,BCL2,BRAF
1478	GO: Biological Process	GO:0014911	positive regulation of smooth muscle cell migration	GeneOntologyBiologicalProcess_GO:0014911_positive regulation of smooth muscle cell migration	2.59915	AGT,BCL2,IGF1
1479	GO: Biological Process	GO:0051602	response to electrical stimulus	GeneOntologyBiologicalProcess_GO:0051602_response to electrical stimulus	2.59915	IGF1,NTRK1,TH
1480	GO: Biological Process	GO:0042594	response to starvation	GeneOntologyBiologicalProcess_GO:0042594_response to starvation	2.59408	BCL2,COMT,LRRK2,SLC18A2,VLDLR
1481	GO: Biological Process	GO:0032886	regulation of microtubule-based process	GeneOntologyBiologicalProcess_GO:0032886_regulation of microtubule-based process	2.58307	CDK5R1,CTNNB1,MAPT,PAFAH1B1,SNCA
1482	GO: Biological Process	GO:0043547	positive regulation of GTPase activity	GeneOntologyBiologicalProcess_GO:0043547_positive regulation of GTPase activity	2.58191	DLG4,GNAS,GRIN1,GRIN2A,GRIN2B,GRIN2D,KALRN,LRRK2,NTRK1,TSC2
1483	GO: Biological Process	GO:0071872	cellular response to epinephrine stimulus	GeneOntologyBiologicalProcess_GO:0071872_cellular response to epinephrine stimulus	2.57843	NOS1,SNCA
1484	GO: Biological Process	GO:0045955	negative regulation of calcium ion-dependent exocytosis	GeneOntologyBiologicalProcess_GO:0045955_negative regulation of calcium ion-dependent exocytosis	2.57843	BRAF,FMR1
1485	GO: Biological Process	GO:0060736	prostate gland growth	GeneOntologyBiologicalProcess_GO:0060736_prostate gland growth	2.57843	AR,IGF1
1486	GO: Biological Process	GO:0038166	angiotensin-activated signaling pathway	GeneOntologyBiologicalProcess_GO:0038166_angiotensin-activated signaling pathway	2.57843	AGT,AGTR2
1487	GO: Biological Process	GO:0035112	genitalia morphogenesis	GeneOntologyBiologicalProcess_GO:0035112_genitalia morphogenesis	2.57843	AR,CTNNB1
1488	GO: Biological Process	GO:0048715	negative regulation of oligodendrocyte differentiation	GeneOntologyBiologicalProcess_GO:0048715_negative regulation of oligodendrocyte differentiation	2.57843	CTNNB1,DRD3
1489	GO: Biological Process	GO:0043568	positive regulation of insulin-like growth factor receptor signaling pathway	GeneOntologyBiologicalProcess_GO:0043568_positive regulation of insulin-like growth factor receptor signaling pathway	2.57843	AR,IGF1
1490	GO: Biological Process	GO:0045838	positive regulation of membrane potential	GeneOntologyBiologicalProcess_GO:0045838_positive regulation of membrane potential	2.57843	DRD1,GRIA1
1491	GO: Biological Process	GO:0033327	Leydig cell differentiation	GeneOntologyBiologicalProcess_GO:0033327_Leydig cell differentiation	2.57843	AR,NKX2-1
1492	GO: Biological Process	GO:0043473	pigmentation	GeneOntologyBiologicalProcess_GO:0043473_pigmentation	2.57556	BCL2,DRD2,TH,TYR
1493	GO: Biological Process	GO:0022904	respiratory electron transport chain	GeneOntologyBiologicalProcess_GO:0022904_respiratory electron transport chain	2.57556	BDNF,MECP2,SLC1A3,SNCA
1494	GO: Biological Process	GO:0050732	negative regulation of peptidyl-tyrosine phosphorylation	GeneOntologyBiologicalProcess_GO:0050732_negative regulation of peptidyl-tyrosine phosphorylation	2.57401	IGF1,PSEN1,PSEN2
1495	GO: Biological Process	GO:0050999	regulation of nitric-oxide synthase activity	GeneOntologyBiologicalProcess_GO:0050999_regulation of nitric-oxide synthase activity	2.57401	AGTR2,APOE,KRAS
1496	GO: Biological Process	GO:0007589	body fluid secretion	GeneOntologyBiologicalProcess_GO:0007589_body fluid secretion	2.56052	ADORA1,ATP2B2,KCNMA1,SLC6A3
1497	GO: Biological Process	GO:1900047	negative regulation of hemostasis	GeneOntologyBiologicalProcess_GO:1900047_negative regulation of hemostasis	2.54941	ABAT,ADRB2,APOE
1498	GO: Biological Process	GO:0046068	cGMP metabolic process	GeneOntologyBiologicalProcess_GO:0046068_cGMP metabolic process	2.54941	APOE,ATP2B2,NOS1
1499	GO: Biological Process	GO:0030195	negative regulation of blood coagulation	GeneOntologyBiologicalProcess_GO:0030195_negative regulation of blood coagulation	2.54941	ABAT,ADRB2,APOE
1500	GO: Biological Process	GO:0046677	response to antibiotic	GeneOntologyBiologicalProcess_GO:0046677_response to antibiotic	2.54941	CASP3,SLC1A3,SOD1
1501	GO: Biological Process	GO:1901657	glycosyl compound metabolic process	GeneOntologyBiologicalProcess_GO:1901657_glycosyl compound metabolic process	2.54392	BDNF,DLG3,DLG4,IGF1,LRRK2,MECP2,SNCA,TH
1502	GO: Biological Process	GO:0002244	hematopoietic progenitor cell differentiation	GeneOntologyBiologicalProcess_GO:0002244_hematopoietic progenitor cell differentiation	2.53979	ACE,BCL2,BRAF,PSEN1,PSEN2
1503	GO: Biological Process	GO:0031327	negative regulation of cellular biosynthetic process	GeneOntologyBiologicalProcess_GO:0031327_negative regulation of cellular biosynthetic process	2.5354	AR,CDK5,CDK5R1,CTNNB1,DACH1,DRD2,DRD3,DRD4,FMR1,GRM7,MECP2,NKX2-1,PRKCA,PSEN1,PSEN2,SNCA,VLDLR,WWC1
1504	GO: Biological Process	GO:0022900	electron transport chain	GeneOntologyBiologicalProcess_GO:0022900_electron transport chain	2.53092	BDNF,MECP2,SLC1A3,SNCA
1505	GO: Biological Process	GO:0048592	eye morphogenesis	GeneOntologyBiologicalProcess_GO:0048592_eye morphogenesis	2.52916	BCL2,BDNF,CTNNB1,NTRK2,TH
1506	GO: Biological Process	GO:0071242	cellular response to ammonium ion	GeneOntologyBiologicalProcess_GO:0071242_cellular response to ammonium ion	2.52534	CDK5R1,LRRK2,SLC18A2
1507	GO: Biological Process	GO:0060119	inner ear receptor cell development	GeneOntologyBiologicalProcess_GO:0060119_inner ear receptor cell development	2.52534	ATP2B2,PAFAH1B1,SOD1
1508	GO: Biological Process	GO:0009994	oocyte differentiation	GeneOntologyBiologicalProcess_GO:0009994_oocyte differentiation	2.52534	BCL2,CTNNB1,IGF1
1509	GO: Biological Process	GO:1902930	regulation of alcohol biosynthetic process	GeneOntologyBiologicalProcess_GO:1902930_regulation of alcohol biosynthetic process	2.52534	APOE,SNCA,SOD1
1510	GO: Biological Process	GO:0034654	nucleobase-containing compound biosynthetic process	GeneOntologyBiologicalProcess_GO:0034654_nucleobase-containing compound biosynthetic process	2.52118	ADORA2A,ADRB2,AGT,AGTR2,APOE,APP,AR,BDNF,CDK5,CDK5R1,CTNNB1,DACH1,DRD1,DRD2,DRD3,DRD4,DRD5,GNAS,GRIN1,GRM7,IGF1,KRAS,MECP2,NGF,NKX2-1,NOS1,NTRK1,PBX3,PPP3CB,PRKCA,PSEN1,PSEN2,RELN,SNCA,TSC2,VLDLR,WWC1
1511	GO: Biological Process	GO:0050731	positive regulation of peptidyl-tyrosine phosphorylation	GeneOntologyBiologicalProcess_GO:0050731_positive regulation of peptidyl-tyrosine phosphorylation	2.51859	ACE,ADORA1,AGT,IGF1,RELN
1512	GO: Biological Process	GO:0050965	detection of temperature stimulus involved in sensory perception of pain	GeneOntologyBiologicalProcess_GO:0050965_detection of temperature stimulus involved in sensory perception of pain	2.51785	ADORA1,NTRK1
1513	GO: Biological Process	GO:0040015	negative regulation of multicellular organism growth	GeneOntologyBiologicalProcess_GO:0040015_negative regulation of multicellular organism growth	2.51785	ADRB2,GNAS
1514	GO: Biological Process	GO:0021984	adenohypophysis development	GeneOntologyBiologicalProcess_GO:0021984_adenohypophysis development	2.51785	DRD2,SLC6A3
1515	GO: Biological Process	GO:0050961	detection of temperature stimulus involved in sensory perception	GeneOntologyBiologicalProcess_GO:0050961_detection of temperature stimulus involved in sensory perception	2.51785	ADORA1,NTRK1
1516	GO: Biological Process	GO:0042415	norepinephrine metabolic process	GeneOntologyBiologicalProcess_GO:0042415_norepinephrine metabolic process	2.51785	DBH,TH
1517	GO: Biological Process	GO:0042756	drinking behavior	GeneOntologyBiologicalProcess_GO:0042756_drinking behavior	2.51785	ACE2,AGT
1518	GO: Biological Process	GO:0033240	positive regulation of cellular amine metabolic process	GeneOntologyBiologicalProcess_GO:0033240_positive regulation of cellular amine metabolic process	2.51785	ABAT,COMT
1519	GO: Biological Process	GO:0022038	corpus callosum development	GeneOntologyBiologicalProcess_GO:0022038_corpus callosum development	2.51785	CDK5,PAFAH1B1
1520	GO: Biological Process	GO:0034434	sterol esterification	GeneOntologyBiologicalProcess_GO:0034434_sterol esterification	2.51785	AGT,APOE
1521	GO: Biological Process	GO:0002031	G-protein coupled receptor internalization	GeneOntologyBiologicalProcess_GO:0002031_G-protein coupled receptor internalization	2.51785	DRD2,DRD3
1522	GO: Biological Process	GO:0060742	epithelial cell differentiation involved in prostate gland development	GeneOntologyBiologicalProcess_GO:0060742_epithelial cell differentiation involved in prostate gland development	2.51785	AR,CTNNB1
1523	GO: Biological Process	GO:0034433	steroid esterification	GeneOntologyBiologicalProcess_GO:0034433_steroid esterification	2.51785	AGT,APOE
1524	GO: Biological Process	GO:0042711	maternal behavior	GeneOntologyBiologicalProcess_GO:0042711_maternal behavior	2.51785	DBH,DRD1
1525	GO: Biological Process	GO:0034435	cholesterol esterification	GeneOntologyBiologicalProcess_GO:0034435_cholesterol esterification	2.51785	AGT,APOE
1526	GO: Biological Process	GO:0010466	negative regulation of peptidase activity	GeneOntologyBiologicalProcess_GO:0010466_negative regulation of peptidase activity	2.51514	ADORA2A,AGT,APP,IGF1,NGF,SNCA
1527	GO: Biological Process	GO:0034330	cell junction organization	GeneOntologyBiologicalProcess_GO:0034330_cell junction organization	2.50684	ACE,ACE2,AGT,BCL2,CTNNB1,PRKCA
1528	GO: Biological Process	GO:2000179	positive regulation of neural precursor cell proliferation	GeneOntologyBiologicalProcess_GO:2000179_positive regulation of neural precursor cell proliferation	2.50177	CTNNB1,DRD2,IGF1
1529	GO: Biological Process	GO:0050819	negative regulation of coagulation	GeneOntologyBiologicalProcess_GO:0050819_negative regulation of coagulation	2.50177	ABAT,ADRB2,APOE
1530	GO: Biological Process	GO:0050866	negative regulation of cell activation	GeneOntologyBiologicalProcess_GO:0050866_negative regulation of cell activation	2.49767	ABAT,ADORA2A,ADRB2,APOE,CASP3
1531	GO: Biological Process	GO:0001568	blood vessel development	GeneOntologyBiologicalProcess_GO:0001568_blood vessel development	2.48991	ACE,ADRB2,AGT,APOE,CHRNA7,CTNNB1,NTRK1,NTRK2,PRKCA,PSEN1
1532	GO: Biological Process	GO:0051252	regulation of RNA metabolic process	GeneOntologyBiologicalProcess_GO:0051252_regulation of RNA metabolic process	2.48823	ADORA2A,ADRB2,AGT,AGTR2,APP,AR,BDNF,CDK5,CDK5R1,CTNNB1,DACH1,DRD2,DRD3,DYRK1A,FMR1,GNAS,GRIN1,IGF1,KRAS,MECP2,NGF,NKX2-1,NOS1,NTRK1,PBX3,PPP3CB,PSEN1,PSEN2,RELN,SNCA,TSC2,VLDLR,WWC1
1533	GO: Biological Process	GO:0060359	response to ammonium ion	GeneOntologyBiologicalProcess_GO:0060359_response to ammonium ion	2.47867	CDK5R1,LRRK2,SLC18A2
1534	GO: Biological Process	GO:0043535	regulation of blood vessel endothelial cell migration	GeneOntologyBiologicalProcess_GO:0043535_regulation of blood vessel endothelial cell migration	2.47867	AGTR2,APOE,PRKCA
1535	GO: Biological Process	GO:0048641	regulation of skeletal muscle tissue development	GeneOntologyBiologicalProcess_GO:0048641_regulation of skeletal muscle tissue development	2.47867	ADRB2,BCL2,CTNNB1
1536	GO: Biological Process	GO:0007163	establishment or maintenance of cell polarity	GeneOntologyBiologicalProcess_GO:0007163_establishment or maintenance of cell polarity	2.47703	DLG3,DLG4,IGF1,PAFAH1B1,WWC1
1537	GO: Biological Process	GO:0060746	parental behavior	GeneOntologyBiologicalProcess_GO:0060746_parental behavior	2.46142	DBH,DRD1
1538	GO: Biological Process	GO:0007158	neuron cell-cell adhesion	GeneOntologyBiologicalProcess_GO:0007158_neuron cell-cell adhesion	2.46142	CDK5R1,NLGN1
1539	GO: Biological Process	GO:0007220	Notch receptor processing	GeneOntologyBiologicalProcess_GO:0007220_Notch receptor processing	2.46142	PSEN1,PSEN2
1540	GO: Biological Process	GO:0002093	auditory receptor cell morphogenesis	GeneOntologyBiologicalProcess_GO:0002093_auditory receptor cell morphogenesis	2.46142	ATP2B2,SOD1
1541	GO: Biological Process	GO:0032928	regulation of superoxide anion generation	GeneOntologyBiologicalProcess_GO:0032928_regulation of superoxide anion generation	2.46142	AGT,SOD1
1542	GO: Biological Process	GO:0051481	negative regulation of cytosolic calcium ion concentration	GeneOntologyBiologicalProcess_GO:0051481_negative regulation of cytosolic calcium ion concentration	2.46142	DRD2,NOS1
1543	GO: Biological Process	GO:0050884	neuromuscular process controlling posture	GeneOntologyBiologicalProcess_GO:0050884_neuromuscular process controlling posture	2.46142	MECP2,SCN1A
1544	GO: Biological Process	GO:0051482	positive regulation of cytosolic calcium ion concentration involved in phospholipase C-activating G-protein coupled signaling pathway	GeneOntologyBiologicalProcess_GO:0051482_positive regulation of cytosolic calcium ion concentration involved in phospholipase C-activating G-protein coupled signaling pathway	2.46142	DRD1,DRD2
1545	GO: Biological Process	GO:0045540	regulation of cholesterol biosynthetic process	GeneOntologyBiologicalProcess_GO:0045540_regulation of cholesterol biosynthetic process	2.46142	APOE,SOD1
1546	GO: Biological Process	GO:0035810	positive regulation of urine volume	GeneOntologyBiologicalProcess_GO:0035810_positive regulation of urine volume	2.46142	ADORA2A,DRD2
1547	GO: Biological Process	GO:0035067	negative regulation of histone acetylation	GeneOntologyBiologicalProcess_GO:0035067_negative regulation of histone acetylation	2.46142	MECP2,SNCA
1548	GO: Biological Process	GO:1900409	positive regulation of cellular response to oxidative stress	GeneOntologyBiologicalProcess_GO:1900409_positive regulation of cellular response to oxidative stress	2.46142	SNCA,SOD1
1549	GO: Biological Process	GO:0090277	positive regulation of peptide hormone secretion	GeneOntologyBiologicalProcess_GO:0090277_positive regulation of peptide hormone secretion	2.45959	ABAT,CASR,DRD2,PPP3CB
1550	GO: Biological Process	GO:0014013	regulation of gliogenesis	GeneOntologyBiologicalProcess_GO:0014013_regulation of gliogenesis	2.45959	CTNNB1,DRD3,MECP2,SYNJ1
1551	GO: Biological Process	GO:0048514	blood vessel morphogenesis	GeneOntologyBiologicalProcess_GO:0048514_blood vessel morphogenesis	2.45883	ACE,ADRB2,AGT,APOE,CHRNA7,CTNNB1,NTRK1,NTRK2,PRKCA
1552	GO: Biological Process	GO:1901342	regulation of vasculature development	GeneOntologyBiologicalProcess_GO:1901342_regulation of vasculature development	2.45784	ADRB2,AGT,CHRNA7,CTNNB1,NTRK1,PRKCA
1553	GO: Biological Process	GO:0007017	microtubule-based process	GeneOntologyBiologicalProcess_GO:0007017_microtubule-based process	2.45697	APP,CDK5R1,CTNNB1,MAPT,NGF,NTRK1,PAFAH1B1,PEX13,SNCA,SOD1
1555	GO: Biological Process	GO:2001237	negative regulation of extrinsic apoptotic signaling pathway	GeneOntologyBiologicalProcess_GO:2001237_negative regulation of extrinsic apoptotic signaling pathway	2.44576	AR,BCL2,IGF1,PSEN2
1556	GO: Biological Process	GO:0010970	transport along microtubule	GeneOntologyBiologicalProcess_GO:0010970_transport along microtubule	2.44576	APP,MAPT,PAFAH1B1,SOD1
1557	GO: Biological Process	GO:0051493	regulation of cytoskeleton organization	GeneOntologyBiologicalProcess_GO:0051493_regulation of cytoskeleton organization	2.44291	BRAF,CDK5,CDK5R1,CTNNB1,MAPT,PAFAH1B1,PAK1,SNCA
1558	GO: Biological Process	GO:0030098	lymphocyte differentiation	GeneOntologyBiologicalProcess_GO:0030098_lymphocyte differentiation	2.44003	BCL2,BMX,BRAF,CTNNB1,NTRK1,PPP3CB,SOD1
1559	GO: Biological Process	GO:0035065	regulation of histone acetylation	GeneOntologyBiologicalProcess_GO:0035065_regulation of histone acetylation	2.43387	MECP2,NOS1,SNCA
1560	GO: Biological Process	GO:0021695	cerebellar cortex development	GeneOntologyBiologicalProcess_GO:0021695_cerebellar cortex development	2.43387	AGTR2,ATP2B2,CDK5
1561	GO: Biological Process	GO:0031396	regulation of protein ubiquitination	GeneOntologyBiologicalProcess_GO:0031396_regulation of protein ubiquitination	2.43385	ADRB2,CDK5,LRRK2,NGF,PSEN1,PSEN2
1562	GO: Biological Process	GO:0072009	nephron epithelium development	GeneOntologyBiologicalProcess_GO:0072009_nephron epithelium development	2.43207	AGT,AGTR2,BCL2,CTNNB1
1563	GO: Biological Process	GO:0009953	dorsal/ventral pattern formation	GeneOntologyBiologicalProcess_GO:0009953_dorsal/ventral pattern formation	2.43207	CTNNB1,NKX2-1,PSEN1,PSEN2
1564	GO: Biological Process	GO:2000027	regulation of organ morphogenesis	GeneOntologyBiologicalProcess_GO:2000027_regulation of organ morphogenesis	2.42593	AGT,AGTR2,AR,BCL2,BDNF,CTNNB1
1565	GO: Biological Process	GO:0070372	regulation of ERK1 and ERK2 cascade	GeneOntologyBiologicalProcess_GO:0070372_regulation of ERK1 and ERK2 cascade	2.41805	ACE2,BRAF,DRD2,IGF1,NTRK1,PRKCA
1566	GO: Biological Process	GO:0009790	embryo development	GeneOntologyBiologicalProcess_GO:0009790_embryo development	2.41432	AR,ATP2B2,CDK5R1,CTNNB1,GNAS,GRIN2B,IGF1,MECP2,PAFAH1B1,PSEN1,PSEN2,SOD1,TH,TSC2
1567	GO: Biological Process	GO:0044060	regulation of endocrine process	GeneOntologyBiologicalProcess_GO:0044060_regulation of endocrine process	2.41212	AGT,AGTR2,GNAS
1568	GO: Biological Process	GO:0030850	prostate gland development	GeneOntologyBiologicalProcess_GO:0030850_prostate gland development	2.41212	AR,CTNNB1,IGF1
1569	GO: Biological Process	GO:2000811	negative regulation of anoikis	GeneOntologyBiologicalProcess_GO:2000811_negative regulation of anoikis	2.40863	BCL2,NTRK2
1570	GO: Biological Process	GO:2000846	regulation of corticosteroid hormone secretion	GeneOntologyBiologicalProcess_GO:2000846_regulation of corticosteroid hormone secretion	2.40863	AGT,AGTR2
1571	GO: Biological Process	GO:1902884	positive regulation of response to oxidative stress	GeneOntologyBiologicalProcess_GO:1902884_positive regulation of response to oxidative stress	2.40863	SNCA,SOD1
1572	GO: Biological Process	GO:0021542	dentate gyrus development	GeneOntologyBiologicalProcess_GO:0021542_dentate gyrus development	2.40863	DRD1,RELN
1573	GO: Biological Process	GO:0045475	locomotor rhythm	GeneOntologyBiologicalProcess_GO:0045475_locomotor rhythm	2.40863	KCND2,KCNMA1
1574	GO: Biological Process	GO:0051969	regulation of transmission of nerve impulse	GeneOntologyBiologicalProcess_GO:0051969_regulation of transmission of nerve impulse	2.40863	AGT,FMR1
1575	GO: Biological Process	GO:0034349	glial cell apoptotic process	GeneOntologyBiologicalProcess_GO:0034349_glial cell apoptotic process	2.40863	CASP3,PRKCA
1576	GO: Biological Process	GO:0016082	synaptic vesicle priming	GeneOntologyBiologicalProcess_GO:0016082_synaptic vesicle priming	2.40863	SNAP25,SYNJ1
1577	GO: Biological Process	GO:0046128	purine ribonucleoside metabolic process	GeneOntologyBiologicalProcess_GO:0046128_purine ribonucleoside metabolic process	2.40696	BDNF,DLG3,DLG4,IGF1,LRRK2,MECP2,SNCA
1578	GO: Biological Process	GO:0007519	skeletal muscle tissue development	GeneOntologyBiologicalProcess_GO:0007519_skeletal muscle tissue development	2.40686	ADRB2,BCL2,CDK5,CTNNB1,KCNAB1
1579	GO: Biological Process	GO:0009063	cellular amino acid catabolic process	GeneOntologyBiologicalProcess_GO:0009063_cellular amino acid catabolic process	2.4051	ABAT,GAD1,HDC,NOS1
1580	GO: Biological Process	GO:1904064	positive regulation of cation transmembrane transport	GeneOntologyBiologicalProcess_GO:1904064_positive regulation of cation transmembrane transport	2.4051	DRD1,DRD4,NOS1,SNCA
1581	GO: Biological Process	GO:0007596	blood coagulation	GeneOntologyBiologicalProcess_GO:0007596_blood coagulation	2.39389	ABAT,ADORA2A,ADRB2,APOE,GNAS,ITPR3,PRKCA
1582	GO: Biological Process	GO:0034111	negative regulation of homotypic cell-cell adhesion	GeneOntologyBiologicalProcess_GO:0034111_negative regulation of homotypic cell-cell adhesion	2.39181	ABAT,ADORA2A,ADRB2,CASP3
1583	GO: Biological Process	GO:0042278	purine nucleoside metabolic process	GeneOntologyBiologicalProcess_GO:0042278_purine nucleoside metabolic process	2.3874	BDNF,DLG3,DLG4,IGF1,LRRK2,MECP2,SNCA
1584	GO: Biological Process	GO:0030308	negative regulation of cell growth	GeneOntologyBiologicalProcess_GO:0030308_negative regulation of cell growth	2.38739	AGT,AGTR2,BCL2,CDK5,CDK5R1
1585	GO: Biological Process	GO:0043603	cellular amide metabolic process	GeneOntologyBiologicalProcess_GO:0043603_cellular amide metabolic process	2.37916	ACE,ACE2,AGT,APOE,APP,BACE1,FMR1,IGF1,NGF,PRKCA,PSEN1,PSEN2,SOD1
1586	GO: Biological Process	GO:0010827	regulation of glucose transport	GeneOntologyBiologicalProcess_GO:0010827_regulation of glucose transport	2.37865	ACE,AGT,IGF1,PRKCA
1587	GO: Biological Process	GO:0090183	regulation of kidney development	GeneOntologyBiologicalProcess_GO:0090183_regulation of kidney development	2.36985	AGT,AGTR2,CTNNB1
1588	GO: Biological Process	GO:0010043	response to zinc ion	GeneOntologyBiologicalProcess_GO:0010043_response to zinc ion	2.36985	GRIN2A,SLC18A2,TH
1589	GO: Biological Process	GO:0097006	regulation of plasma lipoprotein particle levels	GeneOntologyBiologicalProcess_GO:0097006_regulation of plasma lipoprotein particle levels	2.36985	AGT,APOE,VLDLR
1590	GO: Biological Process	GO:0050918	positive chemotaxis	GeneOntologyBiologicalProcess_GO:0050918_positive chemotaxis	2.36985	CASR,PRKCA,TSC2
1591	GO: Biological Process	GO:0010594	regulation of endothelial cell migration	GeneOntologyBiologicalProcess_GO:0010594_regulation of endothelial cell migration	2.36562	AGT,AGTR2,APOE,PRKCA
1592	GO: Biological Process	GO:0007599	hemostasis	GeneOntologyBiologicalProcess_GO:0007599_hemostasis	2.36165	ABAT,ADORA2A,ADRB2,APOE,GNAS,ITPR3,PRKCA
1593	GO: Biological Process	GO:0009415	response to water	GeneOntologyBiologicalProcess_GO:0009415_response to water	2.35904	NTRK1,TH
1594	GO: Biological Process	GO:0021924	cell proliferation in external granule layer	GeneOntologyBiologicalProcess_GO:0021924_cell proliferation in external granule layer	2.35904	IGF1,SLC6A4
1595	GO: Biological Process	GO:0060572	morphogenesis of an epithelial bud	GeneOntologyBiologicalProcess_GO:0060572_morphogenesis of an epithelial bud	2.35904	AR,CTNNB1
1596	GO: Biological Process	GO:0044851	hair cycle phase	GeneOntologyBiologicalProcess_GO:0044851_hair cycle phase	2.35904	PSEN1,PSEN2
1597	GO: Biological Process	GO:0021756	striatum development	GeneOntologyBiologicalProcess_GO:0021756_striatum development	2.35904	DRD1,DRD2
1598	GO: Biological Process	GO:0010560	positive regulation of glycoprotein biosynthetic process	GeneOntologyBiologicalProcess_GO:0010560_positive regulation of glycoprotein biosynthetic process	2.35904	CTNNB1,IGF1
1599	GO: Biological Process	GO:1902931	negative regulation of alcohol biosynthetic process	GeneOntologyBiologicalProcess_GO:1902931_negative regulation of alcohol biosynthetic process	2.35904	APOE,SOD1
1600	GO: Biological Process	GO:0071871	response to epinephrine	GeneOntologyBiologicalProcess_GO:0071871_response to epinephrine	2.35904	NOS1,SNCA
1601	GO: Biological Process	GO:0035930	corticosteroid hormone secretion	GeneOntologyBiologicalProcess_GO:0035930_corticosteroid hormone secretion	2.35904	AGT,AGTR2
1602	GO: Biological Process	GO:0021930	cerebellar granule cell precursor proliferation	GeneOntologyBiologicalProcess_GO:0021930_cerebellar granule cell precursor proliferation	2.35904	IGF1,SLC6A4
1603	GO: Biological Process	GO:0044283	small molecule biosynthetic process	GeneOntologyBiologicalProcess_GO:0044283_small molecule biosynthetic process	2.35288	ABAT,AGT,APOE,CHAT,GAD1,SLC1A3,SNCA,SOD1,SRR
1604	GO: Biological Process	GO:0031102	neuron projection regeneration	GeneOntologyBiologicalProcess_GO:0031102_neuron projection regeneration	2.3493	APOE,BCL2,BRAF
1605	GO: Biological Process	GO:0060986	endocrine hormone secretion	GeneOntologyBiologicalProcess_GO:0060986_endocrine hormone secretion	2.3493	AGT,AGTR2,GNAS
1606	GO: Biological Process	GO:1903364	positive regulation of cellular protein catabolic process	GeneOntologyBiologicalProcess_GO:1903364_positive regulation of cellular protein catabolic process	2.34917	APOE,FMR1,LRRK2,PSEN1,PSEN2
1607	GO: Biological Process	GO:0043588	skin development	GeneOntologyBiologicalProcess_GO:0043588_skin development	2.34871	BCL2,CASP3,CTNNB1,GNAS,PSEN1,PSEN2
1608	GO: Biological Process	GO:0009167	purine ribonucleoside monophosphate metabolic process	GeneOntologyBiologicalProcess_GO:0009167_purine ribonucleoside monophosphate metabolic process	2.34118	BDNF,DLG3,DLG4,IGF1,MECP2,SNCA
1609	GO: Biological Process	GO:2000112	regulation of cellular macromolecule biosynthetic process	GeneOntologyBiologicalProcess_GO:2000112_regulation of cellular macromolecule biosynthetic process	2.34063	ADORA2A,ADRB2,AGT,AGTR2,APP,AR,BCL2,BDNF,CDK5,CDK5R1,CTNNB1,DACH1,DRD2,DRD3,FMR1,GNAS,GRIN1,IGF1,KRAS,MECP2,NGF,NKX2-1,NOS1,NTRK1,PBX3,PPP3CB,PRKCA,PSEN1,PSEN2,RELN,SNCA,TSC2,VLDLR,WWC1
1610	GO: Biological Process	GO:0009126	purine nucleoside monophosphate metabolic process	GeneOntologyBiologicalProcess_GO:0009126_purine nucleoside monophosphate metabolic process	2.33368	BDNF,DLG3,DLG4,IGF1,MECP2,SNCA
1611	GO: Biological Process	GO:2001238	positive regulation of extrinsic apoptotic signaling pathway	GeneOntologyBiologicalProcess_GO:2001238_positive regulation of extrinsic apoptotic signaling pathway	2.32913	AGT,AGTR2,PSEN2
1612	GO: Biological Process	GO:0051928	positive regulation of calcium ion transport	GeneOntologyBiologicalProcess_GO:0051928_positive regulation of calcium ion transport	2.32728	ATP2B2,CASR,DRD1,SNCA
1613	GO: Biological Process	GO:0060048	cardiac muscle contraction	GeneOntologyBiologicalProcess_GO:0060048_cardiac muscle contraction	2.32728	ACE2,ADORA1,NOS1,PSEN2
1614	GO: Biological Process	GO:0010256	endomembrane system organization	GeneOntologyBiologicalProcess_GO:0010256_endomembrane system organization	2.32361	AR,KALRN,LRRK2,PACS1,PAFAH1B1,PRKCA,SOD1,SYNJ1,TSC2
1615	GO: Biological Process	GO:0045995	regulation of embryonic development	GeneOntologyBiologicalProcess_GO:0045995_regulation of embryonic development	2.31475	AR,CTNNB1,IGF1,PAFAH1B1
1616	GO: Biological Process	GO:0050709	negative regulation of protein secretion	GeneOntologyBiologicalProcess_GO:0050709_negative regulation of protein secretion	2.31475	DRD2,DRD3,DRD4,NOS1
1617	GO: Biological Process	GO:1904385	cellular response to angiotensin	GeneOntologyBiologicalProcess_GO:1904385_cellular response to angiotensin	2.3123	AGT,AGTR2
1618	GO: Biological Process	GO:0071696	ectodermal placode development	GeneOntologyBiologicalProcess_GO:0071696_ectodermal placode development	2.3123	CTNNB1,GNAS
1619	GO: Biological Process	GO:0060788	ectodermal placode formation	GeneOntologyBiologicalProcess_GO:0060788_ectodermal placode formation	2.3123	CTNNB1,GNAS
1620	GO: Biological Process	GO:0071697	ectodermal placode morphogenesis	GeneOntologyBiologicalProcess_GO:0071697_ectodermal placode morphogenesis	2.3123	CTNNB1,GNAS
1621	GO: Biological Process	GO:0021534	cell proliferation in hindbrain	GeneOntologyBiologicalProcess_GO:0021534_cell proliferation in hindbrain	2.3123	IGF1,SLC6A4
1622	GO: Biological Process	GO:0010155	regulation of proton transport	GeneOntologyBiologicalProcess_GO:0010155_regulation of proton transport	2.3123	DRD3,DRD4
1623	GO: Biological Process	GO:0030828	positive regulation of cGMP biosynthetic process	GeneOntologyBiologicalProcess_GO:0030828_positive regulation of cGMP biosynthetic process	2.3123	APOE,NOS1
1624	GO: Biological Process	GO:0043092	L-amino acid import	GeneOntologyBiologicalProcess_GO:0043092_L-amino acid import	2.3123	AGT,SLC1A3
1625	GO: Biological Process	GO:0060538	skeletal muscle organ development	GeneOntologyBiologicalProcess_GO:0060538_skeletal muscle organ development	2.3119	ADRB2,BCL2,CDK5,CTNNB1,KCNAB1
1626	GO: Biological Process	GO:0044242	cellular lipid catabolic process	GeneOntologyBiologicalProcess_GO:0044242_cellular lipid catabolic process	2.3119	ADRB2,APOE,DRD1,FAAH,PEX13
1627	GO: Biological Process	GO:0019748	secondary metabolic process	GeneOntologyBiologicalProcess_GO:0019748_secondary metabolic process	2.30932	BCL2,TH,TYR
1628	GO: Biological Process	GO:2000756	regulation of peptidyl-lysine acetylation	GeneOntologyBiologicalProcess_GO:2000756_regulation of peptidyl-lysine acetylation	2.30932	MECP2,NOS1,SNCA
1629	GO: Biological Process	GO:0002066	columnar/cuboidal epithelial cell development	GeneOntologyBiologicalProcess_GO:0002066_columnar/cuboidal epithelial cell development	2.30932	ATP2B2,PAFAH1B1,SOD1
1630	GO: Biological Process	GO:0040017	positive regulation of locomotion	GeneOntologyBiologicalProcess_GO:0040017_positive regulation of locomotion	2.30331	AGT,BCL2,CASR,DRD1,IGF1,PAK1,PRKCA,RELN
1631	GO: Biological Process	GO:0006366	transcription by RNA polymerase II	GeneOntologyBiologicalProcess_GO:0006366_transcription by RNA polymerase II	2.30181	ADRB2,APP,AR,CTNNB1,DACH1,DRD2,DRD3,GNAS,GRIN1,IGF1,MECP2,NKX2-1,NOS1,PBX3,PPP3CB,PSEN1,PSEN2,SNCA,TSC2,VLDLR,WWC1
1632	GO: Biological Process	GO:0044271	cellular nitrogen compound biosynthetic process	GeneOntologyBiologicalProcess_GO:0044271_cellular nitrogen compound biosynthetic process	2.2944	ADORA2A,ADRB2,AGT,AGTR2,APOE,APP,AR,BDNF,CDK5,CDK5R1,CTNNB1,DACH1,DRD1,DRD2,DRD3,DRD4,DRD5,FMR1,GNAS,GRIN1,GRM7,HDC,IGF1,KRAS,MECP2,NGF,NKX2-1,NOS1,NTRK1,PBX3,PPP3CB,PRKCA,PSEN1,PSEN2,RELN,SNCA,TPH2,TSC2,VLDLR,WWC1
1633	GO: Biological Process	GO:0046578	regulation of Ras protein signal transduction	GeneOntologyBiologicalProcess_GO:0046578_regulation of Ras protein signal transduction	2.2936	APOE,IGF1,KALRN,KRAS,NTRK1
1634	GO: Biological Process	GO:0032526	response to retinoic acid	GeneOntologyBiologicalProcess_GO:0032526_response to retinoic acid	2.29002	ADH1C,DRD1,SLC6A4,SYNJ1
1635	GO: Biological Process	GO:0016202	regulation of striated muscle tissue development	GeneOntologyBiologicalProcess_GO:0016202_regulation of striated muscle tissue development	2.29002	ADRB2,BCL2,BDNF,CTNNB1
1636	GO: Biological Process	GO:0090280	positive regulation of calcium ion import	GeneOntologyBiologicalProcess_GO:0090280_positive regulation of calcium ion import	2.28986	CASR,DRD1,SNCA
1637	GO: Biological Process	GO:2000243	positive regulation of reproductive process	GeneOntologyBiologicalProcess_GO:2000243_positive regulation of reproductive process	2.28986	AR,CTNNB1,DRD4
1638	GO: Biological Process	GO:0015980	energy derivation by oxidation of organic compounds	GeneOntologyBiologicalProcess_GO:0015980_energy derivation by oxidation of organic compounds	2.28941	BDNF,GNAS,IGF1,MECP2,SLC1A3,SNCA
1639	GO: Biological Process	GO:0006508	proteolysis	GeneOntologyBiologicalProcess_GO:0006508_proteolysis	2.28004	ACE,ACE2,ADORA2A,AGT,APOE,APP,BACE1,CASP3,CDK5,CTNNB1,FMR1,IGF1,LRRK2,NGF,PSEN1,PSEN2,RELN,SNCA
1640	GO: Biological Process	GO:0008585	female gonad development	GeneOntologyBiologicalProcess_GO:0008585_female gonad development	2.27783	AGT,BCL2,CHAT,SOD1
1641	GO: Biological Process	GO:0045428	regulation of nitric oxide biosynthetic process	GeneOntologyBiologicalProcess_GO:0045428_regulation of nitric oxide biosynthetic process	2.27073	AGT,AGTR2,IGF1
1642	GO: Biological Process	GO:0070059	intrinsic apoptotic signaling pathway in response to endoplasmic reticulum stress	GeneOntologyBiologicalProcess_GO:0070059_intrinsic apoptotic signaling pathway in response to endoplasmic reticulum stress	2.27073	BCL2,CASP3,LRRK2
1643	GO: Biological Process	GO:0061045	negative regulation of wound healing	GeneOntologyBiologicalProcess_GO:0061045_negative regulation of wound healing	2.27073	ABAT,ADRB2,APOE
1644	GO: Biological Process	GO:0045844	positive regulation of striated muscle tissue development	GeneOntologyBiologicalProcess_GO:0045844_positive regulation of striated muscle tissue development	2.27073	ADRB2,BCL2,CTNNB1
1645	GO: Biological Process	GO:0048636	positive regulation of muscle organ development	GeneOntologyBiologicalProcess_GO:0048636_positive regulation of muscle organ development	2.27073	ADRB2,BCL2,CTNNB1
1646	GO: Biological Process	GO:1990776	response to angiotensin	GeneOntologyBiologicalProcess_GO:1990776_response to angiotensin	2.2681	AGT,AGTR2
1647	GO: Biological Process	GO:0046037	GMP metabolic process	GeneOntologyBiologicalProcess_GO:0046037_GMP metabolic process	2.2681	DLG3,DLG4
1648	GO: Biological Process	GO:0071285	cellular response to lithium ion	GeneOntologyBiologicalProcess_GO:0071285_cellular response to lithium ion	2.2681	CTNNB1,TPH2
1649	GO: Biological Process	GO:0051900	regulation of mitochondrial depolarization	GeneOntologyBiologicalProcess_GO:0051900_regulation of mitochondrial depolarization	2.2681	BCL2,LRRK2
1650	GO: Biological Process	GO:0010738	regulation of protein kinase A signaling	GeneOntologyBiologicalProcess_GO:0010738_regulation of protein kinase A signaling	2.2681	GRIN2B,LRRK2
1651	GO: Biological Process	GO:0006582	melanin metabolic process	GeneOntologyBiologicalProcess_GO:0006582_melanin metabolic process	2.2681	BCL2,TYR
1652	GO: Biological Process	GO:0016048	detection of temperature stimulus	GeneOntologyBiologicalProcess_GO:0016048_detection of temperature stimulus	2.2681	ADORA1,NTRK1
1653	GO: Biological Process	GO:0042921	glucocorticoid receptor signaling pathway	GeneOntologyBiologicalProcess_GO:0042921_glucocorticoid receptor signaling pathway	2.2681	BDNF,NTRK2
1654	GO: Biological Process	GO:0042401	cellular biogenic amine biosynthetic process	GeneOntologyBiologicalProcess_GO:0042401_cellular biogenic amine biosynthetic process	2.2681	HDC,TPH2
1655	GO: Biological Process	GO:1903020	positive regulation of glycoprotein metabolic process	GeneOntologyBiologicalProcess_GO:1903020_positive regulation of glycoprotein metabolic process	2.2681	CTNNB1,IGF1
1656	GO: Biological Process	GO:2000757	negative regulation of peptidyl-lysine acetylation	GeneOntologyBiologicalProcess_GO:2000757_negative regulation of peptidyl-lysine acetylation	2.2681	MECP2,SNCA
1657	GO: Biological Process	GO:0046325	negative regulation of glucose import	GeneOntologyBiologicalProcess_GO:0046325_negative regulation of glucose import	2.2681	ACE,PRKCA
1658	GO: Biological Process	GO:0044788	modulation by host of viral process	GeneOntologyBiologicalProcess_GO:0044788_modulation by host of viral process	2.2681	APOE,FMR1
1659	GO: Biological Process	GO:0048820	hair follicle maturation	GeneOntologyBiologicalProcess_GO:0048820_hair follicle maturation	2.2681	PSEN1,PSEN2
1660	GO: Biological Process	GO:1902307	positive regulation of sodium ion transmembrane transport	GeneOntologyBiologicalProcess_GO:1902307_positive regulation of sodium ion transmembrane transport	2.2681	DRD4,NOS1
1661	GO: Biological Process	GO:0051146	striated muscle cell differentiation	GeneOntologyBiologicalProcess_GO:0051146_striated muscle cell differentiation	2.26771	AGT,AGTR2,BCL2,IGF1,KRAS,NOS1
1662	GO: Biological Process	GO:0048634	regulation of muscle organ development	GeneOntologyBiologicalProcess_GO:0048634_regulation of muscle organ development	2.26575	ADRB2,BCL2,BDNF,CTNNB1
1663	GO: Biological Process	GO:0060514	prostate induction	GeneOntologyBiologicalProcess_GO:0060514_prostate induction	2.25481	AR
1664	GO: Biological Process	GO:0051621	regulation of norepinephrine uptake	GeneOntologyBiologicalProcess_GO:0051621_regulation of norepinephrine uptake	2.25481	SNCA
1665	GO: Biological Process	GO:1903000	regulation of lipid transport across blood brain barrier	GeneOntologyBiologicalProcess_GO:1903000_regulation of lipid transport across blood brain barrier	2.25481	APOE
1666	GO: Biological Process	GO:0018964	propylene metabolic process	GeneOntologyBiologicalProcess_GO:0018964_propylene metabolic process	2.25481	GRIN1
1667	GO: Biological Process	GO:1903282	regulation of glutathione peroxidase activity	GeneOntologyBiologicalProcess_GO:1903282_regulation of glutathione peroxidase activity	2.25481	SNCA
1668	GO: Biological Process	GO:1903285	positive regulation of hydrogen peroxide catabolic process	GeneOntologyBiologicalProcess_GO:1903285_positive regulation of hydrogen peroxide catabolic process	2.25481	SNCA
1669	GO: Biological Process	GO:1901042	positive regulation of L-arginine import	GeneOntologyBiologicalProcess_GO:1901042_positive regulation of L-arginine import	2.25481	AGT
1670	GO: Biological Process	GO:0046186	acetaldehyde biosynthetic process	GeneOntologyBiologicalProcess_GO:0046186_acetaldehyde biosynthetic process	2.25481	ADH1C
1671	GO: Biological Process	GO:2001139	negative regulation of phospholipid transport	GeneOntologyBiologicalProcess_GO:2001139_negative regulation of phospholipid transport	2.25481	APOE
1672	GO: Biological Process	GO:1905010	positive regulation of L-lysine import across plasma membrane	GeneOntologyBiologicalProcess_GO:1905010_positive regulation of L-lysine import across plasma membrane	2.25481	AGT
1673	GO: Biological Process	GO:0040032	post-embryonic body morphogenesis	GeneOntologyBiologicalProcess_GO:0040032_post-embryonic body morphogenesis	2.25481	GNAS
1674	GO: Biological Process	GO:1905008	regulation of L-lysine import across plasma membrane	GeneOntologyBiologicalProcess_GO:1905008_regulation of L-lysine import across plasma membrane	2.25481	AGT
1675	GO: Biological Process	GO:0038002	endocrine signaling	GeneOntologyBiologicalProcess_GO:0038002_endocrine signaling	2.25481	KRAS
1676	GO: Biological Process	GO:0016191	synaptic vesicle uncoating	GeneOntologyBiologicalProcess_GO:0016191_synaptic vesicle uncoating	2.25481	SYNJ1
1677	GO: Biological Process	GO:0070494	regulation of thrombin-activated receptor signaling pathway	GeneOntologyBiologicalProcess_GO:0070494_regulation of thrombin-activated receptor signaling pathway	2.25481	SNCA
1678	GO: Biological Process	GO:0042696	menarche	GeneOntologyBiologicalProcess_GO:0042696_menarche	2.25481	NKX2-1
[truncated: 932 more rows]

## Sheet: For network
Immune system	ACE
Immune system	ADORA1
Immune system	ADORA2A
Immune system	APP
Immune system	BCL2
Immune system	BMX
Immune system	BRAF
Immune system	CASP3
[truncated: 359 more rows]
